# Supplementary material for: An integrated cell atlas of the human lung in health and disease
Source: bioRxiv preprint, doi:10.1101/2022.03.10.483747, version 1 (2022-03-11)
Supplement: Extended Data Table 2 [file 483747_file03.xlsx]

## Sheet: SuppT_sample_overview
sample	HLCA_core_or_extension	study	dataset	subject_ID	age	sex	ethnicity	mixed_ethnicity	smoking_status	BMI	lung_condition	subject_type	cause_of_death	sample_type	single_cell_platform	3'_or_5'	sequencing_platform	cell_ranger_version	fresh_or_frozen	anatomical_region_level_1	anatomical_region_level_2	anatomical_region_level_3	cells_or_nuclei
F01157	core	Banovich_Kropski_2020	Banovich_Kropski_2020	THD0001	36	male	white	nan	active	29.9	healthy	organ_donor	nan	donor_lung	10x_5'_v1	5'	Illumina NovaSeq 6000 S1	v.3.1.0	fresh	parenchyma			cells
F01365	core	Banovich_Kropski_2020	Banovich_Kropski_2020	THD0005	59	male	white	nan	active	30	healthy	organ_donor	nan	donor_lung	10x_5'_v1	5'	Illumina NovaSeq 6000 S1	v.3.1.0	fresh	parenchyma	parenchyma lower lobe	parenchyma left lower lobe	cells
F01366	core	Banovich_Kropski_2020	Banovich_Kropski_2020	THD0005	59	male	white	nan	active	30	healthy	organ_donor	nan	donor_lung	10x_5'_v1	5'	Illumina NovaSeq 6000 S1	v.3.1.0	fresh	parenchyma	parenchyma lower lobe	parenchyma left lower lobe	cells
F01367	core	Banovich_Kropski_2020	Banovich_Kropski_2020	THD0005	59	male	white	nan	active	30	healthy	organ_donor	nan	donor_lung	10x_5'_v1	5'	Illumina NovaSeq 6000 S1	v.3.1.0	fresh	parenchyma	parenchyma lower lobe	parenchyma left lower lobe	cells
F01403	core	Banovich_Kropski_2020	Banovich_Kropski_2020	THD0006	35	male	white	nan	never	28.8	healthy	organ_donor	head trauma	donor_lung	10x_5'_v1	5'	Illumina NovaSeq 6000 S1	v.3.1.0	fresh	parenchyma			cells
F01607	core	Banovich_Kropski_2020	Banovich_Kropski_2020	THD0007	57	male	white	nan	former	25.3	healthy	organ_donor	head trauma	donor_lung	10x_5'_v1	5'	Illumina NovaSeq 6000 S2	v.3.1.0	fresh	parenchyma			cells
F01639	core	Banovich_Kropski_2020	Banovich_Kropski_2020	THD0008	53	male	white	nan	active	33.8	healthy	organ_donor	nan	donor_lung	10x_5'_v1	5'	Illumina NovaSeq 6000 S2	v.3.1.0	fresh	parenchyma			cells
F01641	core	Banovich_Kropski_2020	Banovich_Kropski_2020	THD0009	54	female	white	nan	nan	22.3	healthy	organ_donor	nan	donor_lung	10x_5'_v1	5'	Illumina NovaSeq 6000 S2	v.3.1.0	fresh	parenchyma			cells
F01692	core	Banovich_Kropski_2020	Banovich_Kropski_2020	THD0010	47	male	latino	nan	never	30	healthy	organ_donor	nan	donor_lung	10x_5'_v1	5'	Illumina NovaSeq 6000 S2	v.3.1.0	fresh	parenchyma	parenchyma lower lobe	parenchyma right lower lobe	cells
F01874	core	Banovich_Kropski_2020	Banovich_Kropski_2020	THD0012	40	male	white	nan	former	47.8	healthy	organ_donor	nan	donor_lung	10x_5'_v1	5'	Illumina NovaSeq 6000 S2	v.3.1.0	fresh	parenchyma			cells
F02092	core	Banovich_Kropski_2020	Banovich_Kropski_2020	THD0014	64	male	white	nan	never	21.5	healthy	organ_donor	CVA/stroke	donor_lung	10x_5'_v1	5'	Illumina NovaSeq 6000 SP	v.3.1.0	fresh	parenchyma			cells
F02509	core	Banovich_Kropski_2020	Banovich_Kropski_2020	THD0015	58	male	white	nan	nan	24.8	healthy	organ_donor	nan	donor_lung	10x_5'_v1	5'	Illumina NovaSeq 6000 S4	v.3.1.0	fresh	parenchyma	parenchyma lower lobe	parenchyma right lower lobe	cells
F02730	core	Banovich_Kropski_2020	Banovich_Kropski_2020	THD0017	42	male	white	nan	active	30.9	healthy	organ_donor	nan	donor_lung	10x_5'_v2	5'	Illumina NovaSeq 6000 S4	v.3.1.0	fresh	parenchyma			cells
F02992	core	Banovich_Kropski_2020	Banovich_Kropski_2020	THD0019	55	male	white	nan	active	33.2	healthy	organ_donor	nan	donor_lung	10x_5'_v2	5'	Illumina NovaSeq 6000 S4	v.3.1.0	fresh	parenchyma	parenchyma lower lobe	parenchyma right lower lobe	cells
F03045	core	Banovich_Kropski_2020	Banovich_Kropski_2020	THD0020	40	male	white	nan	active	28.3	healthy	organ_donor	nan	donor_lung	10x_5'_v2	5'	Illumina NovaSeq 6000 S4	v.3.1.0	fresh	parenchyma			cells
F01394	core	Banovich_Kropski_2020	Banovich_Kropski_2020	VUHD071	38	male	white	nan	active	24.1	healthy	organ_donor	nan	donor_lung	10x_5'_v1	5'	Illumina NovaSeq 6000 S1	v.3.1.0	fresh	parenchyma	parenchyma upper lobe	parenchyma right upper lobe	cells
F01483	core	Banovich_Kropski_2020	Banovich_Kropski_2020	VUHD072	71	female	white	nan	active	21.1	healthy	organ_donor	nan	donor_lung	10x_5'_v1	5'	Illumina NovaSeq 6000 S1	v.3.1.0	fresh	parenchyma			cells
F01494	core	Banovich_Kropski_2020	Banovich_Kropski_2020	VUHD073	55	female	white	nan	active	48.9	healthy	organ_donor	nan	donor_lung	10x_5'_v1	5'	Illumina NovaSeq 6000 S1	v.3.1.0	fresh	parenchyma			cells
F01495	core	Banovich_Kropski_2020	Banovich_Kropski_2020	VUHD073	55	female	white	nan	active	48.9	healthy	organ_donor	nan	donor_lung	10x_5'_v1	5'	Illumina NovaSeq 6000 S1	v.3.1.0	fresh	parenchyma			cells
F01506	core	Banovich_Kropski_2020	Banovich_Kropski_2020	VUHD076	15	male	white	nan	never		healthy	organ_donor	nan	donor_lung	10x_5'_v1	5'	Illumina NovaSeq 6000 S1	v.3.1.0	fresh	parenchyma			cells
F01508	core	Banovich_Kropski_2020	Banovich_Kropski_2020	VUHD077	55	female	white	nan	active		healthy	organ_donor	nan	donor_lung	10x_5'_v1	5'	nan	v.3.1.0	fresh	parenchyma			cells
F01511	core	Banovich_Kropski_2020	Banovich_Kropski_2020	VUHD078	27	male	white	nan	former		healthy	organ_donor	nan	donor_lung	10x_5'_v1	5'	Illumina NovaSeq 6000 S1	v.3.1.0	fresh	parenchyma			cells
F01513	core	Banovich_Kropski_2020	Banovich_Kropski_2020	VUHD080	29	male	white	nan	former		healthy	organ_donor	nan	donor_lung	10x_5'_v1	5'	Illumina NovaSeq 6000 S1	v.3.1.0	fresh	parenchyma			cells
VUHD101	core	Banovich_Kropski_2020	Banovich_Kropski_2020	VUHD101	25	male	nan	nan	never		healthy	organ_donor	nan	donor_lung	10x_5'_v1	5'	Illumina NovaSeq 6000 S4	v.3.1.0	fresh	parenchyma			cells
F02617	core	Banovich_Kropski_2020	Banovich_Kropski_2020	VUHD103	55	male	white	nan	never	21.8	healthy	organ_donor	nan	donor_lung	10x_5'_v1	5'	Illumina NovaSeq 6000 S4	v.3.1.0	fresh	parenchyma			cells
F02607	core	Banovich_Kropski_2020	Banovich_Kropski_2020	VUHD104	29	male	black	nan	active		healthy	organ_donor	nan	donor_lung	10x_5'_v1	5'	Illumina NovaSeq 6000 S4	v.3.1.0	fresh	parenchyma			cells
F02609	core	Banovich_Kropski_2020	Banovich_Kropski_2020	VUHD105	58	male	nan	nan	never		healthy	organ_donor	nan	donor_lung	10x_5'_v1	5'	Illumina NovaSeq 6000 S4	v.3.1.0	fresh	parenchyma			cells
F02611	core	Banovich_Kropski_2020	Banovich_Kropski_2020	VUHD106	49	male	white	nan	former		healthy	organ_donor	stroke	donor_lung	10x_5'_v1	5'	Illumina NovaSeq 6000 S4	v.3.1.0	fresh	parenchyma			cells
F02613	core	Banovich_Kropski_2020	Banovich_Kropski_2020	VUHD107	25	male	white	nan	former	34.7	healthy	organ_donor	MVA	donor_lung	10x_5'_v1	5'	Illumina NovaSeq 6000 S4	v.3.1.0	fresh	parenchyma			cells
VUHD66	core	Banovich_Kropski_2020	Banovich_Kropski_2020	VUHD66	30	male	white	nan	active	24.1	healthy	organ_donor	nan	donor_lung	10x_5'_v1	5'	Illumina NovaSeq 6000 S1	v.3.1.0	fresh	parenchyma	parenchyma upper lobe	parenchyma right upper lobe	cells
VUHD67	core	Banovich_Kropski_2020	Banovich_Kropski_2020	VUHD67	30	female	nan	nan	active		healthy	organ_donor	meth overdose	donor_lung	10x_5'_v1	5'	Illumina NovaSeq 6000 S1	v.3.1.0	fresh	parenchyma	parenchyma upper lobe	parenchyma right upper lobe	cells
VUHD68	core	Banovich_Kropski_2020	Banovich_Kropski_2020	VUHD68	41	male	white	nan	former	23.5	healthy	organ_donor	nan	donor_lung	10x_5'_v1	5'	Illumina NovaSeq 6000 S1	v.3.1.0	fresh	parenchyma	parenchyma upper lobe	parenchyma right upper lobe	cells
F00409	core	Banovich_Kropski_2020	Banovich_Kropski_2020	VUHD69	31	female	black	nan	never	38.3	healthy	organ_donor	nan	donor_lung	10x_5'_v1	5'	Illumina NovaSeq 6000 S1	v.3.1.0	fresh	parenchyma			cells
VUHD70	core	Banovich_Kropski_2020	Banovich_Kropski_2020	VUHD70	54	male	white	nan	active	40.2	healthy	organ_donor	Intracerebral hemorrhage	donor_lung	10x_5'_v1	5'	Illumina NovaSeq 6000 S1	v.3.1.0	fresh	parenchyma	parenchyma upper lobe	parenchyma right upper lobe	cells
F01851	core	Banovich_Kropski_2020	Banovich_Kropski_2020	VUHD84	34	female	white	nan	former		healthy	organ_donor	nan	donor_lung	10x_5'_v1	5'	Illumina NovaSeq 6000 S2	v.3.1.0	fresh	parenchyma			cells
F01853	core	Banovich_Kropski_2020	Banovich_Kropski_2020	VUHD85	53	male	black	nan	never		healthy	organ_donor	nan	donor_lung	10x_5'_v1	5'	Illumina NovaSeq 6000 S2	v.3.1.0	fresh	parenchyma			cells
F01869	core	Banovich_Kropski_2020	Banovich_Kropski_2020	VUHD87	53	male	white	nan	former		healthy	organ_donor	nan	donor_lung	10x_5'_v1	5'	Illumina NovaSeq 6000 S2	v.3.1.0	fresh	parenchyma			cells
F02526	core	Banovich_Kropski_2020	Banovich_Kropski_2020	VUHD92	55	male	black	nan	never	31.8	healthy	organ_donor	nan	donor_lung	10x_5'_v1	5'	Illumina NovaSeq 6000 S4	v.3.1.0	fresh	parenchyma			cells
F02524	core	Banovich_Kropski_2020	Banovich_Kropski_2020	VUHD94	62	male	white	nan	never	41.5	healthy	organ_donor	nan	donor_lung	10x_5'_v1	5'	Illumina NovaSeq 6000 S4	v.3.1.0	fresh	parenchyma			cells
F02522	core	Banovich_Kropski_2020	Banovich_Kropski_2020	VUHD95	64	female	white	nan	never	39.4	healthy	organ_donor	nan	donor_lung	10x_5'_v1	5'	Illumina NovaSeq 6000 S4	v.3.1.0	fresh	parenchyma			cells
F02528	core	Banovich_Kropski_2020	Banovich_Kropski_2020	VUHD98	69	male	white	nan	never		healthy	organ_donor	nan	donor_lung	10x_5'_v1	5'	Illumina NovaSeq 6000 S4	v.3.1.0	fresh	parenchyma			cells
D322_Biop_Nas1	core	Barbry_Leroy_2020	Barbry_Leroy_2020	D322	30	female	white	nan	never	28	healthy	alive_healthy	nan	biopsy	10x_3'_v2	3'	Illumina NextSeq 500	v.3.0.2	nan	nose	inferior turbinate	inferior turbinate right nostril	cells
D322_Biop_Pro1	core	Barbry_Leroy_2020	Barbry_Leroy_2020	D322	30	female	white	nan	never	28	healthy	alive_healthy	nan	biopsy	10x_3'_v2	3'	Illumina NextSeq 500	v.3.0.2	nan	airway	trachea		cells
D326_Biop_Int1	core	Barbry_Leroy_2020	Barbry_Leroy_2020	D326	31	male	white	nan	never	26.1	healthy	alive_healthy	nan	biopsy	10x_3'_v2	3'	Illumina NextSeq 500	v.3.0.2	nan	airway	lobular bronchi	lobular bronchi upper left lobe	cells
D326_Biop_Pro1	core	Barbry_Leroy_2020	Barbry_Leroy_2020	D326	31	male	white	nan	never	26.1	healthy	alive_healthy	nan	biopsy	10x_3'_v2	3'	Illumina NextSeq 500	v.3.0.2	nan	airway	trachea		cells
D326_Brus_Dis1	core	Barbry_Leroy_2020	Barbry_Leroy_2020	D326	31	male	white	nan	never	26.1	healthy	alive_healthy	nan	brush	10x_3'_v2	3'	Illumina NextSeq 500	v.3.0.2	nan	airway	distal lobular airways	distal airways upper left lobe	cells
D337_Brus_Dis1	core	Barbry_Leroy_2020	Barbry_Leroy_2020	D337	35	female	white	nan	former	21.3	healthy	alive_healthy	nan	brush	10x_3'_v2	3'	Illumina NextSeq 500	v.3.0.2	nan	airway	distal lobular airways	distal airways lower right lobe	cells
D339_Biop_Int1	core	Barbry_Leroy_2020	Barbry_Leroy_2020	D339	29	male	white	nan	never	27.6	healthy	alive_healthy	nan	biopsy	10x_3'_v2	3'	Illumina NextSeq 500	v.3.0.2	nan	airway	lobular bronchi	lobular bronchi upper left lobe	cells
D339_Biop_Nas1	core	Barbry_Leroy_2020	Barbry_Leroy_2020	D339	29	male	white	nan	never	27.6	healthy	alive_healthy	nan	biopsy	10x_3'_v2	3'	Illumina NextSeq 500	v.3.0.2	nan	nose	inferior turbinate	inferior turbinate right nostril	cells
D339_Biop_Pro1	core	Barbry_Leroy_2020	Barbry_Leroy_2020	D339	29	male	white	nan	never	27.6	healthy	alive_healthy	nan	biopsy	10x_3'_v2	3'	Illumina NextSeq 500	v.3.0.2	nan	airway	trachea		cells
D344_Biop_Int1	core	Barbry_Leroy_2020	Barbry_Leroy_2020	D344	26	female	white	nan	former	20.5	healthy	alive_healthy	nan	biopsy	10x_3'_v2	3'	Illumina NextSeq 500	v.3.0.2	nan	airway	lobular bronchi	lobular bronchi upper right lobe	cells
D344_Biop_Nas1	core	Barbry_Leroy_2020	Barbry_Leroy_2020	D344	26	female	white	nan	former	20.5	healthy	alive_healthy	nan	biopsy	10x_3'_v2	3'	Illumina NextSeq 500	v.3.0.2	nan	nose	inferior turbinate	inferior turbinate right nostril	cells
D344_Biop_Pro1	core	Barbry_Leroy_2020	Barbry_Leroy_2020	D344	26	female	white	nan	former	20.5	healthy	alive_healthy	nan	biopsy	10x_3'_v2	3'	Illumina NextSeq 500	v.3.0.2	nan	airway	trachea		cells
D344_Brus_Dis1	core	Barbry_Leroy_2020	Barbry_Leroy_2020	D344	26	female	white	nan	former	20.5	healthy	alive_healthy	nan	brush	10x_3'_v2	3'	Illumina NextSeq 500	v.3.0.2	nan	airway	distal lobular airways	distal airways lower right lobe	cells
D353_Biop_Int2	core	Barbry_Leroy_2020	Barbry_Leroy_2020	D353	30	female	white	nan	never	20.2	healthy	alive_healthy	nan	biopsy	10x_3'_v2	3'	Illumina NextSeq 500	v.3.0.2	nan	airway	lobular bronchi	lobular bronchi upper right lobe	cells
D353_Biop_Pro1	core	Barbry_Leroy_2020	Barbry_Leroy_2020	D353	30	female	white	nan	never	20.2	healthy	alive_healthy	nan	biopsy	10x_3'_v2	3'	Illumina NextSeq 500	v.3.0.2	nan	airway	trachea		cells
D353_Brus_Dis1	core	Barbry_Leroy_2020	Barbry_Leroy_2020	D353	30	female	white	nan	never	20.2	healthy	alive_healthy	nan	brush	10x_3'_v2	3'	Illumina NextSeq 500	v.3.0.2	nan	airway	distal lobular airways	distal airways middle right lobe	cells
D353_Brus_Nas1	core	Barbry_Leroy_2020	Barbry_Leroy_2020	D353	30	female	white	nan	never	20.2	healthy	alive_healthy	nan	brush	10x_3'_v2	3'	Illumina NextSeq 500	v.3.0.2	nan	nose	inferior turbinate	inferior turbinate left nostril	cells
D354_Biop_Int2	core	Barbry_Leroy_2020	Barbry_Leroy_2020	D354	33	male	white	nan	never	23.8	healthy	alive_healthy	nan	biopsy	10x_3'_v2	3'	Illumina NextSeq 500	v.3.0.2	nan	airway	lobular bronchi	lobular bronchi upper left lobe	cells
D354_Biop_Pro1	core	Barbry_Leroy_2020	Barbry_Leroy_2020	D354	33	male	white	nan	never	23.8	healthy	alive_healthy	nan	biopsy	10x_3'_v2	3'	Illumina NextSeq 500	v.3.0.2	nan	airway	trachea		cells
D354_Brus_Dis1	core	Barbry_Leroy_2020	Barbry_Leroy_2020	D354	33	male	white	nan	never	23.8	healthy	alive_healthy	nan	brush	10x_3'_v2	3'	Illumina NextSeq 500	v.3.0.2	nan	airway	distal lobular airways	distal airways upper right lobe	cells
D363_Biop_Int2	core	Barbry_Leroy_2020	Barbry_Leroy_2020	D363	24	female	white	nan	never	21	healthy	alive_healthy	nan	biopsy	10x_3'_v2	3'	Illumina NextSeq 500	v.3.0.2	nan	airway	lobular bronchi	lobular bronchi lower right lobe	cells
D363_Biop_Pro1	core	Barbry_Leroy_2020	Barbry_Leroy_2020	D363	24	female	white	nan	never	21	healthy	alive_healthy	nan	biopsy	10x_3'_v2	3'	Illumina NextSeq 500	v.3.0.2	nan	airway	trachea		cells
D363_Brus_Dis1	core	Barbry_Leroy_2020	Barbry_Leroy_2020	D363	24	female	white	nan	never	21	healthy	alive_healthy	nan	brush	10x_3'_v2	3'	Illumina NextSeq 500	v.3.0.2	nan	airway	distal lobular airways	distal airways middle right lobe	cells
D363_Brus_Nas1	core	Barbry_Leroy_2020	Barbry_Leroy_2020	D363	24	female	white	nan	never	21	healthy	alive_healthy	nan	brush	10x_3'_v2	3'	Illumina NextSeq 500	v.3.0.2	nan	nose	inferior turbinate		cells
D367_Biop_Int1	core	Barbry_Leroy_2020	Barbry_Leroy_2020	D367	27	male	black	nan	never	20.4	healthy	alive_healthy	nan	biopsy	10x_3'_v2	3'	Illumina NextSeq 500	v.3.0.2	nan	airway	lobular bronchi	lobular bronchi lower left lobe	cells
D367_Biop_Pro1	core	Barbry_Leroy_2020	Barbry_Leroy_2020	D367	27	male	black	nan	never	20.4	healthy	alive_healthy	nan	biopsy	10x_3'_v2	3'	Illumina NextSeq 500	v.3.0.2	nan	airway	trachea		cells
D367_Brus_Dis1	core	Barbry_Leroy_2020	Barbry_Leroy_2020	D367	27	male	black	nan	never	20.4	healthy	alive_healthy	nan	brush	10x_3'_v2	3'	Illumina NextSeq 500	v.3.0.2	nan	airway	distal lobular airways	distal airways lower left lobe	cells
D367_Brus_Nas1	core	Barbry_Leroy_2020	Barbry_Leroy_2020	D367	27	male	black	nan	never	20.4	healthy	alive_healthy	nan	brush	10x_3'_v2	3'	Illumina NextSeq 500	v.3.0.2	nan	nose	inferior turbinate	inferior turbinate left nostril	cells
D372_Biop_Int1	core	Barbry_Leroy_2020	Barbry_Leroy_2020	D372	35	female	white	nan	former	23.7	healthy	alive_healthy	nan	biopsy	10x_3'_v2	3'	Illumina NextSeq 500	v.3.0.2	nan	airway	lobular bronchi	lobular bronchi lower left lobe	cells
D372_Biop_Int2	core	Barbry_Leroy_2020	Barbry_Leroy_2020	D372	35	female	white	nan	former	23.7	healthy	alive_healthy	nan	biopsy	10x_3'_v2	3'	Illumina NextSeq 500	v.3.0.2	nan	airway	lobular bronchi	lobular bronchi lower right lobe	cells
D372_Biop_Pro1	core	Barbry_Leroy_2020	Barbry_Leroy_2020	D372	35	female	white	nan	former	23.7	healthy	alive_healthy	nan	biopsy	10x_3'_v2	3'	Illumina NextSeq 500	v.3.0.2	nan	airway	trachea		cells
D372_Brus_Dis1	core	Barbry_Leroy_2020	Barbry_Leroy_2020	D372	35	female	white	nan	former	23.7	healthy	alive_healthy	nan	brush	10x_3'_v2	3'	Illumina NextSeq 500	v.3.0.2	nan	airway	distal lobular airways	distal airways upper left lobe	cells
D372_Brus_Nas1	core	Barbry_Leroy_2020	Barbry_Leroy_2020	D372	35	female	white	nan	former	23.7	healthy	alive_healthy	nan	brush	10x_3'_v2	3'	Illumina NextSeq 500	v.3.0.2	nan	nose	inferior turbinate	inferior turbinate right nostril	cells
SC172	core	Jain_Misharin_2021	Jain_Misharin_2021_10Xv1	2020-3173-NC002	57	male	asian	nan	never	23	healthy	alive_healthy	nan	scraping	10x_5'_v1	5'	Illumina NovaSeq 6000	v.4.0.0	fresh	nose	inferior turbinate	inferior turbinate right nostril	cells
SC174_SC172	core	Jain_Misharin_2021	Jain_Misharin_2021_10Xv1	2020-3173-NC002	57	male	asian	nan	never	23	healthy	alive_healthy	nan	scraping	10x_5'_v1	5'	Illumina NovaSeq 6000	v.4.0.0	fresh	nose	inferior turbinate	inferior turbinate right nostril	cells
SC173	core	Jain_Misharin_2021	Jain_Misharin_2021_10Xv1	2020-3173-NC008	41	male	white	nan	never	19.9	healthy	alive_healthy	nan	scraping	10x_5'_v1	5'	Illumina NovaSeq 6000	v.4.0.0	fresh	nose	inferior turbinate	inferior turbinate right nostril	cells
SC174_SC173	core	Jain_Misharin_2021	Jain_Misharin_2021_10Xv1	2020-3173-NC008	41	male	white	nan	never	19.9	healthy	alive_healthy	nan	scraping	10x_5'_v1	5'	Illumina NovaSeq 6000	v.4.0.0	fresh	nose	inferior turbinate	inferior turbinate right nostril	cells
SC181	core	Jain_Misharin_2021	Jain_Misharin_2021_10Xv2	2020-3173-NC003	30	male	white	nan	nan	26.4	healthy	alive_healthy	nan	scraping	10x_5'_v2	5'	Illumina NovaSeq 6000	v.4.0.0	fresh	nose	inferior turbinate	inferior turbinate right nostril	cells
SC182	core	Jain_Misharin_2021	Jain_Misharin_2021_10Xv2	2020-3173-NC004	27	female	mixed	white/asian	nan	28.2	healthy	alive_healthy	nan	scraping	10x_5'_v2	5'	Illumina NovaSeq 6000	v.4.0.0	fresh	nose	inferior turbinate	inferior turbinate right nostril	cells
SC183	core	Jain_Misharin_2021	Jain_Misharin_2021_10Xv2	2020-3173-NC005	37	female	black	nan	nan	24.3	healthy	alive_healthy	nan	scraping	10x_5'_v2	5'	Illumina NovaSeq 6000	v.4.0.0	fresh	nose	inferior turbinate	inferior turbinate right nostril	cells
SC184	core	Jain_Misharin_2021	Jain_Misharin_2021_10Xv2	2020-3173-NC006	25	male	latino	nan	nan	25.4	healthy	alive_healthy	nan	scraping	10x_5'_v2	5'	Illumina NovaSeq 6000	v.4.0.0	fresh	nose	inferior turbinate	inferior turbinate right nostril	cells
SC185	core	Jain_Misharin_2021	Jain_Misharin_2021_10Xv2	2020-3173-NC007		female	white	nan	nan		healthy	alive_healthy	nan	scraping	10x_5'_v2	5'	Illumina NovaSeq 6000	v.4.0.0	fresh	nose	inferior turbinate	inferior turbinate right nostril	cells
distal 1a	core	Krasnow_2020	Krasnow_2020	donor 1	75	male	white	nan	former	24.6	non-small cell lung cancer	alive_disease	nan	surgical_resection	10x_3'_v2	3'	Illumina NovaSeq 6000	v.3.1.0	fresh	parenchyma	parenchyma upper lobe	parenchyma left upper lobe	cells
distal 2	core	Krasnow_2020	Krasnow_2020	donor 2	46	male	white	nan	never	33.1	carcinoid	alive_disease	nan	surgical_resection	10x_3'_v2	3'	Illumina NovaSeq 6000	v.3.1.0	fresh	parenchyma	parenchyma right middle lobe		cells
medial 2	core	Krasnow_2020	Krasnow_2020	donor 2	46	male	white	nan	never	33.1	carcinoid	alive_disease	nan	surgical_resection	10x_3'_v2	3'	Illumina NovaSeq 6000	v.3.1.0	fresh	airway	distal lobular airways	distal airways middle right lobe	cells
distal 3	core	Krasnow_2020	Krasnow_2020	donor 3	51	female	nan	nan	never	22	carcinoid	alive_disease	nan	surgical_resection	10x_3'_v2	3'	Illumina NovaSeq 6000	v.3.1.0	fresh	parenchyma	parenchyma lower lobe	parenchyma left lower lobe	cells
proximal 3	core	Krasnow_2020	Krasnow_2020	donor 3	51	female	nan	nan	never	22	carcinoid	alive_disease	nan	surgical_resection	10x_3'_v2	3'	Illumina NovaSeq 6000	v.3.1.0	fresh	airway	segmental bronchi		cells
SC14	core	Lafyatis_Rojas_2019	Lafyatis_Rojas_2019_10Xv1	lafy_donor_1	76	male	asian	nan	never		healthy	organ_donor	nan	donor_lung	10x_3'_v1	3'	Illumina NextSeq 500	nan	fresh	parenchyma			cells
SC31	core	Lafyatis_Rojas_2019	Lafyatis_Rojas_2019_10Xv1	lafy_donor_2	56	male	white	nan	never		healthy	organ_donor	nan	donor_lung	10x_3'_v1	3'	Illumina NextSeq 500	nan	fresh	parenchyma			cells
SC31D	core	Lafyatis_Rojas_2019	Lafyatis_Rojas_2019_10Xv1	lafy_donor_2	56	male	white	nan	never		healthy	organ_donor	nan	donor_lung	10x_3'_v1	3'	Illumina NextSeq 500	nan	fresh	parenchyma			cells
SC45	core	Lafyatis_Rojas_2019	Lafyatis_Rojas_2019_10Xv2	lafy_donor_3	55	male	white	nan	former		healthy	organ_donor	nan	donor_lung	10x_3'_v2	3'	Illumina NextSeq 500	nan	fresh	parenchyma			cells
SC56	core	Lafyatis_Rojas_2019	Lafyatis_Rojas_2019_10Xv2	lafy_donor_4	57	female	white	nan	never		healthy	organ_donor	nan	donor_lung	10x_3'_v2	3'	Illumina NextSeq 500	nan	fresh	parenchyma			cells
SC59	core	Lafyatis_Rojas_2019	Lafyatis_Rojas_2019_10Xv2	lafy_donor_5	18	male	white	nan	never		healthy	organ_donor	nan	donor_lung	10x_3'_v2	3'	Illumina NextSeq 500	nan	fresh	parenchyma			cells
SC155	core	Lafyatis_Rojas_2019	Lafyatis_Rojas_2019_10Xv2	lafy_donor_6	23	female	white	nan	never		healthy	organ_donor	nan	donor_lung	10x_3'_v2	3'	Illumina NextSeq 500	nan	fresh	parenchyma	parenchyma lower lobe		cells
SC156	core	Lafyatis_Rojas_2019	Lafyatis_Rojas_2019_10Xv2	lafy_donor_6	23	female	white	nan	never		healthy	organ_donor	nan	donor_lung	10x_3'_v2	3'	Illumina NextSeq 500	nan	fresh	parenchyma	parenchyma upper lobe		cells
356C_0h	core	Meyer_2019	Meyer_2019	356C	42.5	female	white	nan	never	41	had TB as a child (fully treated over 30+ years)	organ_donor	Intracranial haemorrhage	donor_lung	10x_3'_v2	3'	Illumina HiSeq 4000	v.2.0.2	fresh	parenchyma	parenchyma lower lobe	parenchyma left lower lobe	cells
356C_12h	core	Meyer_2019	Meyer_2019	356C	42.5	female	white	nan	never	41	had TB as a child (fully treated over 30+ years)	organ_donor	Intracranial haemorrhage	donor_lung	10x_3'_v2	3'	Illumina HiSeq 4000	v.2.0.2	fresh	parenchyma	parenchyma lower lobe	parenchyma left lower lobe	cells
356C_24h	core	Meyer_2019	Meyer_2019	356C	42.5	female	white	nan	never	41	had TB as a child (fully treated over 30+ years)	organ_donor	Intracranial haemorrhage	donor_lung	10x_3'_v2	3'	Illumina HiSeq 4000	v.2.0.2	fresh	parenchyma	parenchyma lower lobe	parenchyma left lower lobe	cells
356C_72h	core	Meyer_2019	Meyer_2019	356C	42.5	female	white	nan	never	41	had TB as a child (fully treated over 30+ years)	organ_donor	Intracranial haemorrhage	donor_lung	10x_3'_v2	3'	Illumina HiSeq 4000	v.2.0.2	fresh	parenchyma	parenchyma lower lobe	parenchyma left lower lobe	cells
368C_0h	core	Meyer_2019	Meyer_2019	368C	57.5	male	white	nan	active	22	healthy	organ_donor	Intracranial haemorrhage	donor_lung	10x_3'_v2	3'	Illumina HiSeq 4000	v.2.0.2	fresh	parenchyma	parenchyma lower lobe	parenchyma left lower lobe	cells
368C_12h	core	Meyer_2019	Meyer_2019	368C	57.5	male	white	nan	active	22	healthy	organ_donor	Intracranial haemorrhage	donor_lung	10x_3'_v2	3'	Illumina HiSeq 4000	v.2.0.2	fresh	parenchyma	parenchyma lower lobe	parenchyma left lower lobe	cells
368C_24h	core	Meyer_2019	Meyer_2019	368C	57.5	male	white	nan	active	22	healthy	organ_donor	Intracranial haemorrhage	donor_lung	10x_3'_v2	3'	Illumina HiSeq 4000	v.2.0.2	fresh	parenchyma	parenchyma lower lobe	parenchyma left lower lobe	cells
368C_72h	core	Meyer_2019	Meyer_2019	368C	57.5	male	white	nan	active	22	healthy	organ_donor	Intracranial haemorrhage	donor_lung	10x_3'_v2	3'	Illumina HiSeq 4000	v.2.0.2	fresh	parenchyma	parenchyma lower lobe	parenchyma left lower lobe	cells
390C_0h	core	Meyer_2019	Meyer_2019	390C	67.5	female	white	nan	never	34	healthy	organ_donor	Intracranial haemorrhage	donor_lung	10x_3'_v2	3'	Illumina HiSeq 4000	v.2.0.2	fresh	parenchyma	parenchyma lower lobe	parenchyma left lower lobe	cells
390C_12h	core	Meyer_2019	Meyer_2019	390C	67.5	female	white	nan	never	34	healthy	organ_donor	Intracranial haemorrhage	donor_lung	10x_3'_v2	3'	Illumina HiSeq 4000	v.2.0.2	fresh	parenchyma	parenchyma lower lobe	parenchyma left lower lobe	cells
390C_24h	core	Meyer_2019	Meyer_2019	390C	67.5	female	white	nan	never	34	healthy	organ_donor	Intracranial haemorrhage	donor_lung	10x_3'_v2	3'	Illumina HiSeq 4000	v.2.0.2	fresh	parenchyma	parenchyma lower lobe	parenchyma left lower lobe	cells
390C_72h	core	Meyer_2019	Meyer_2019	390C	67.5	female	white	nan	never	34	healthy	organ_donor	Intracranial haemorrhage	donor_lung	10x_3'_v2	3'	Illumina HiSeq 4000	v.2.0.2	fresh	parenchyma	parenchyma lower lobe	parenchyma left lower lobe	cells
SC84	core	Misharin_2021	Misharin_2021	NU_CZI01	52	male	black	nan	nan	47.7	healthy	organ_donor	stroke, intracranial hemorrhage	donor_lung	10x_3'_v3	3'	Illumina HiSeq 4000	v.3.0.2	fresh	parenchyma	parenchyma upper lobe	parenchyma left upper lobe	cells
SC85	core	Misharin_2021	Misharin_2021	NU_CZI01	52	male	black	nan	nan	47.7	healthy	organ_donor	stroke, intracranial hemorrhage	donor_lung	10x_3'_v3	3'	Illumina HiSeq 4000	v.3.0.2	fresh	parenchyma	parenchyma upper lobe	parenchyma left upper lobe	cells
SC86	core	Misharin_2021	Misharin_2021	NU_CZI01	52	male	black	nan	nan	47.7	healthy	organ_donor	stroke, intracranial hemorrhage	donor_lung	10x_3'_v3	3'	Illumina HiSeq 4000	v.3.0.2	fresh	parenchyma	parenchyma upper lobe	parenchyma left upper lobe	cells
SC87	core	Misharin_2021	Misharin_2021	NU_CZI01	52	male	black	nan	nan	47.7	healthy	organ_donor	stroke, intracranial hemorrhage	donor_lung	10x_3'_v3	3'	Illumina HiSeq 4000	v.3.0.2	fresh	airway	left or right main bronchus		cells
SC88	core	Misharin_2021	Misharin_2021	NU_CZI01	52	male	black	nan	nan	47.7	healthy	organ_donor	stroke, intracranial hemorrhage	donor_lung	10x_3'_v3	3'	Illumina HiSeq 4000	v.3.0.2	fresh	airway	left or right main bronchus		cells
SC89	core	Misharin_2021	Misharin_2021	NU_CZI01	52	male	black	nan	nan	47.7	healthy	organ_donor	stroke, intracranial hemorrhage	donor_lung	10x_3'_v3	3'	Illumina HiSeq 4000	v.3.0.2	fresh	airway	left or right main bronchus		cells
SC141	core	Misharin_2021	Misharin_2021	NU_CZI02	25	male	nan	nan	nan		healthy	organ_donor	head trauma	donor_lung	10x_3'_v3	3'	Illumina NovaSeq 6000	v.3.1.0	fresh	parenchyma			cells
SC142	core	Misharin_2021	Misharin_2021	NU_CZI02	25	male	nan	nan	nan		healthy	organ_donor	head trauma	donor_lung	10x_3'_v3	3'	Illumina NovaSeq 6000	v.3.1.0	fresh	parenchyma			cells
SC143	core	Misharin_2021	Misharin_2021	NU_CZI02	25	male	nan	nan	nan		healthy	organ_donor	head trauma	donor_lung	10x_3'_v3	3'	Illumina NovaSeq 6000	v.3.1.0	fresh	parenchyma			cells
SC144	core	Misharin_2021	Misharin_2021	NU_CZI02	25	male	nan	nan	nan		healthy	organ_donor	head trauma	donor_lung	10x_3'_v3	3'	Illumina NovaSeq 6000	v.3.1.0	fresh	parenchyma			cells
SC07	core	Misharin_Budinger_2018	Misharin_Budinger_2018	Donor_01	63	male	black	nan	never		healthy	organ_donor	stroke	donor_lung	10x_3'_v2	3'	Illumina HiSeq 4000	v.2.0.1	fresh	parenchyma	parenchyma lower lobe		cells
SC10	core	Misharin_Budinger_2018	Misharin_Budinger_2018	Donor_02	55	male	asian	nan	former		healthy	organ_donor	intracranial hemorrhage	donor_lung	10x_3'_v2	3'	Illumina HiSeq 4000	v.1.3.1	fresh	parenchyma	parenchyma lower lobe		cells
SC18	core	Misharin_Budinger_2018	Misharin_Budinger_2018	Donor_03	29	female	black	nan	never		healthy	organ_donor	anoxic brain injury	donor_lung	10x_3'_v2	3'	Illumina HiSeq 4000	v.2.0.1	fresh	parenchyma	parenchyma lower lobe		cells
SC20	core	Misharin_Budinger_2018	Misharin_Budinger_2018	Donor_04	57	female	black	nan	never		healthy	organ_donor	anoxic brain injury	donor_lung	10x_3'_v2	3'	Illumina HiSeq 4000	v.2.0.1	fresh	parenchyma	parenchyma lower lobe		cells
SC22	core	Misharin_Budinger_2018	Misharin_Budinger_2018	Donor_05	49	female	white	nan	active		healthy	organ_donor	intracranial hemorrhage	donor_lung	10x_3'_v2	3'	Illumina HiSeq 4000	v.2.0.1	fresh	parenchyma	parenchyma lower lobe		cells
SC24	core	Misharin_Budinger_2018	Misharin_Budinger_2018	Donor_06	22	female	black	nan	never		healthy	organ_donor	anoxic brain injury after seizure	donor_lung	10x_3'_v2	3'	Illumina HiSeq 4000	v.2.0.1	fresh	parenchyma	parenchyma lower lobe		cells
SC27	core	Misharin_Budinger_2018	Misharin_Budinger_2018	Donor_07	47	female	white	nan	active		healthy	organ_donor	intracranial hemorrhage	donor_lung	10x_3'_v2	3'	Illumina HiSeq 4000	v.2.0.1	fresh	parenchyma	parenchyma lower lobe		cells
SC29	core	Misharin_Budinger_2018	Misharin_Budinger_2018	Donor_08	21	male	black	nan	never		healthy	organ_donor	head trauma from gunshot wound	donor_lung	10x_3'_v2	3'	Illumina HiSeq 4000	v.2.0.1	fresh	parenchyma	parenchyma lower lobe		cells
GRO-01_biopsy	core	Nawijn_2021	Nawijn_2021	GRO-01	41	male	white	nan	never	23.5	healthy	alive_healthy	nan	biopsy	10x_3'_v2	3'	Illumina NovaSeq 6000	v.2.0.2	fresh	airway	lobular bronchi		cells
GRO-01_nasal_brush	core	Nawijn_2021	Nawijn_2021	GRO-01	41	male	white	nan	never	23.5	healthy	alive_healthy	nan	brush	10x_3'_v2	3'	Illumina NovaSeq 6000	v.2.0.2	fresh	nose	inferior turbinate		cells
GRO-02_biopsy	core	Nawijn_2021	Nawijn_2021	GRO-02	61	female	white	nan	never	24.3	healthy	alive_healthy	nan	biopsy	10x_3'_v2	3'	Illumina NovaSeq 6000	v.2.0.2	fresh	airway	lobular bronchi		cells
GRO-03_biopsy	core	Nawijn_2021	Nawijn_2021	GRO-03	57	male	white	nan	never	25.1	healthy	alive_healthy	nan	biopsy	10x_3'_v2	3'	Illumina NovaSeq 6000	v.2.0.2	fresh	airway	lobular bronchi		cells
GRO-03_nasal_brush	core	Nawijn_2021	Nawijn_2021	GRO-03	57	male	white	nan	never	25.1	healthy	alive_healthy	nan	brush	10x_3'_v2	3'	Illumina NovaSeq 6000	v.2.0.2	fresh	nose	inferior turbinate		cells
GRO-04_biopsy	core	Nawijn_2021	Nawijn_2021	GRO-04	52	male	white	nan	never	31	healthy	alive_healthy	nan	biopsy	10x_3'_v2	3'	Illumina NovaSeq 6000	v.2.0.2	fresh	airway	lobular bronchi		cells
GRO-04_nasal_brush	core	Nawijn_2021	Nawijn_2021	GRO-04	52	male	white	nan	never	31	healthy	alive_healthy	nan	brush	10x_3'_v2	3'	Illumina NovaSeq 6000	v.2.0.2	fresh	nose	inferior turbinate		cells
GRO-06_biopsy	core	Nawijn_2021	Nawijn_2021	GRO-06	56	male	white	nan	never	22.4	healthy	alive_healthy	nan	biopsy	10x_3'_v2	3'	Illumina HiSeq 4000	v.2.0.2	fresh	airway	lobular bronchi		cells
GRO-07_biopsy	core	Nawijn_2021	Nawijn_2021	GRO-07	64	male	white	nan	former	32	healthy	alive_healthy	nan	biopsy	10x_3'_v2	3'	Illumina HiSeq 4000	v.2.0.2	fresh	airway	lobular bronchi		cells
GRO-08_biopsy	core	Nawijn_2021	Nawijn_2021	GRO-08	51	male	white	nan	never	23.7	healthy	alive_healthy	nan	biopsy	10x_3'_v2	3'	Illumina HiSeq 4000	v.2.0.2	fresh	airway	lobular bronchi		cells
GRO-09_biopsy	core	Nawijn_2021	Nawijn_2021	GRO-09	50	female	white	nan	former	22.6	healthy	alive_healthy	nan	biopsy	10x_3'_v2	3'	Illumina HiSeq 4000	v.2.0.2	fresh	airway	lobular bronchi		cells
GRO-09_nasal_brush	core	Nawijn_2021	Nawijn_2021	GRO-09	50	female	white	nan	former	22.6	healthy	alive_healthy	nan	brush	10x_3'_v2	3'	Illumina HiSeq 4000	v.2.0.2	fresh	nose	inferior turbinate		cells
GRO-10_biopsy	core	Nawijn_2021	Nawijn_2021	GRO-10	59	male	white	nan	never	28.7	healthy	alive_healthy	nan	biopsy	10x_3'_v2	3'	Illumina HiSeq 4000	v.2.0.2	fresh	airway	lobular bronchi		cells
GRO-10_nasal_brush	core	Nawijn_2021	Nawijn_2021	GRO-10	59	male	white	nan	never	28.7	healthy	alive_healthy	nan	brush	10x_3'_v2	3'	Illumina HiSeq 4000	v.2.0.2	fresh	nose	inferior turbinate		cells
GRO-11_biopsy	core	Nawijn_2021	Nawijn_2021	GRO-11	59	male	white	nan	never	23.5	healthy	alive_healthy	nan	biopsy	10x_3'_v2	3'	Illumina HiSeq 4000	v.2.0.2	fresh	airway	lobular bronchi		cells
T120	core	Seibold_2020	Seibold_2020_10Xv2	T120	57	female	white	nan	active	22.039	healthy	organ_donor	nan	donor_lung	10x_3'_v2	3'	Illumina NovaSeq 6000	v.2	frozen	airway	trachea		cells
T121	core	Seibold_2020	Seibold_2020_10Xv2	T121	23	female	nan	nan	active		healthy	organ_donor	nan	donor_lung	10x_3'_v2	3'	Illumina NovaSeq 6000	v.2	frozen	airway	trachea		cells
T126	core	Seibold_2020	Seibold_2020_10Xv2	T126	35	female	white	nan	never		healthy	organ_donor	nan	donor_lung	10x_3'_v2	3'	Illumina NovaSeq 6000	v.2	frozen	airway	trachea		cells
T137	core	Seibold_2020	Seibold_2020_10Xv2	T137	27	female	latino	nan	never	24.705	healthy	organ_donor	nan	donor_lung	10x_3'_v2	3'	Illumina NovaSeq 6000	v.2	frozen	airway	trachea		cells
T85	core	Seibold_2020	Seibold_2020_10Xv2	T85	59	male	black	nan	active	23.246	healthy	organ_donor	nan	donor_lung	10x_3'_v2	3'	Illumina NovaSeq 6000; Illumina HiSeq 4000	v.2	frozen	airway	trachea		cells
T89	core	Seibold_2020	Seibold_2020_10Xv2	T89	10	female	pacific islander	nan	never	25.333	healthy	organ_donor	nan	donor_lung	10x_3'_v2	3'	Illumina NovaSeq 6000; Illumina HiSeq 4000	v.2	frozen	airway	trachea		cells
T101	core	Seibold_2020	Seibold_2020_10Xv3	T101	55	male	nan	nan	active		healthy	organ_donor	nan	donor_lung	10x_3'_v3	3'	Illumina NovaSeq 6000	v.3	frozen	airway	trachea		cells
T153	core	Seibold_2020	Seibold_2020_10Xv3	T153	38	male	latino	nan	never	28.161	healthy	organ_donor	nan	donor_lung	10x_3'_v3	3'	Illumina NovaSeq 6000	v.3	frozen	airway	trachea		cells
T154	core	Seibold_2020	Seibold_2020_10Xv3	T154	61	male	white	nan	active	26.636	healthy	organ_donor	nan	donor_lung	10x_3'_v3	3'	Illumina NovaSeq 6000	v.3	frozen	airway	trachea		cells
T164	core	Seibold_2020	Seibold_2020_10Xv3	T164	66	male	white	nan	never	28.903	healthy	organ_donor	nan	donor_lung	10x_3'_v3	3'	Illumina NovaSeq 6000	v.3	frozen	airway	trachea		cells
T165	core	Seibold_2020	Seibold_2020_10Xv3	T165	64	male	white	nan	never	24.395	healthy	organ_donor	nan	donor_lung	10x_3'_v3	3'	Illumina NovaSeq 6000	v.3	frozen	airway	trachea		cells
T166	core	Seibold_2020	Seibold_2020_10Xv3	T166	68	female	white	nan	never	21.35	healthy	organ_donor	nan	donor_lung	10x_3'_v3	3'	Illumina NovaSeq 6000	v.3	frozen	airway	trachea		cells
T167	core	Seibold_2020	Seibold_2020_10Xv3	T167	66	female	white	nan	active	24.977	healthy	organ_donor	nan	donor_lung	10x_3'_v3	3'	Illumina NovaSeq 6000	v.3	frozen	airway	trachea		cells
T90	core	Seibold_2020	Seibold_2020_10Xv3	T90	44	male	white	nan	active	31.395	healthy	organ_donor	nan	donor_lung	10x_3'_v3	3'	Illumina NovaSeq 6000	v.3	frozen	airway	trachea		cells
7119452	core	Teichmann_Meyer_2019	Teichmann_Meyer_2019	284C	57.5	male	white	nan	former	26	healthy	organ_donor	accident	donor_lung	10x_3'_v2	3'	Illumina HiSeq 4000	v.2.0.2	fresh	parenchyma	parenchyma lower lobe	parenchyma left lower lobe	cells
7119453	core	Teichmann_Meyer_2019	Teichmann_Meyer_2019	284C	57.5	male	white	nan	former	26	healthy	organ_donor	accident	donor_lung	10x_3'_v2	3'	Illumina HiSeq 4000	v.2.0.2	fresh	parenchyma	parenchyma lower lobe	parenchyma left lower lobe	cells
7135919	core	Teichmann_Meyer_2019	Teichmann_Meyer_2019	290B	62.5	female	mixed	Mixed race; South american	active	28	healthy	organ_donor	drug overdose	donor_lung	10x_3'_v2	3'	Illumina HiSeq 4000	v.2.0.2	fresh	parenchyma	parenchyma lower lobe	parenchyma left lower lobe	cells
7135920	core	Teichmann_Meyer_2019	Teichmann_Meyer_2019	290B	62.5	female	mixed	Mixed race; South american	active	28	healthy	organ_donor	drug overdose	donor_lung	10x_3'_v2	3'	Illumina HiSeq 4000	v.2.0.2	fresh	parenchyma	parenchyma lower lobe	parenchyma left lower lobe	cells
7239213	core	Teichmann_Meyer_2019	Teichmann_Meyer_2019	292B	57.5	male	white	nan	active	27	worsening respiratory function prior to arrest	organ_donor	Intracranial haemorrhage	donor_lung	10x_3'_v2	3'	Illumina HiSeq 4000	v.2.0.2	fresh	parenchyma	parenchyma lower lobe	parenchyma left lower lobe	cells
7185212	core	Teichmann_Meyer_2019	Teichmann_Meyer_2019	296C	32.5	female	white	nan	active	21	healthy	organ_donor	Intracranial haemorrhage	donor_lung	10x_3'_v2	3'	Illumina HiSeq 4000	v.2.0.2	fresh	parenchyma	parenchyma lower lobe	parenchyma left lower lobe	cells
7185213	core	Teichmann_Meyer_2019	Teichmann_Meyer_2019	296C	32.5	female	white	nan	active	21	healthy	organ_donor	Intracranial haemorrhage	donor_lung	10x_3'_v2	3'	Illumina HiSeq 4000	v.2.0.2	fresh	parenchyma	parenchyma lower lobe	parenchyma right lower lobe	cells
7239219	core	Teichmann_Meyer_2019	Teichmann_Meyer_2019	298C	52.5	male	white	nan	former	23	healthy	organ_donor	Intracranial haemorrhage	donor_lung	10x_3'_v2	3'	Illumina HiSeq 4000	v.2.0.2	fresh	parenchyma	parenchyma lower lobe	parenchyma left lower lobe	cells
7239220	core	Teichmann_Meyer_2019	Teichmann_Meyer_2019	298C	52.5	male	white	nan	former	23	healthy	organ_donor	Intracranial haemorrhage	donor_lung	10x_3'_v2	3'	Illumina HiSeq 4000	v.2.0.2	fresh	parenchyma	parenchyma lower lobe	parenchyma right lower lobe	cells
7239217	core	Teichmann_Meyer_2019	Teichmann_Meyer_2019	302C	42.5	male	white	nan	active	34	healthy	organ_donor	known or suspected suicide	donor_lung	10x_3'_v2	3'	Illumina HiSeq 4000	v.2.0.2	fresh	parenchyma	parenchyma lower lobe	parenchyma left lower lobe	cells
7239218	core	Teichmann_Meyer_2019	Teichmann_Meyer_2019	302C	42.5	male	white	nan	active	34	healthy	organ_donor	known or suspected suicide	donor_lung	10x_3'_v2	3'	Illumina HiSeq 4000	v.2.0.2	fresh	parenchyma	parenchyma lower lobe	parenchyma right lower lobe	cells
TILD001	extension	Banovich_Kropski_2020	Banovich_Kropski_2020	TILD001	nan	nan	nan		nan		IPF			lung_explant						nan	nan	nan	cells
TILD006	extension	Banovich_Kropski_2020	Banovich_Kropski_2020	TILD006	nan	nan	nan		nan		IPF			lung_explant						nan	nan	nan	cells
TILD010	extension	Banovich_Kropski_2020	Banovich_Kropski_2020	TILD010	nan	nan	nan		nan		IPF			lung_explant						nan	nan	nan	cells
TILD015	extension	Banovich_Kropski_2020	Banovich_Kropski_2020	TILD015	nan	nan	nan		nan		IPF			lung_explant						nan	nan	nan	cells
TILD019	extension	Banovich_Kropski_2020	Banovich_Kropski_2020	TILD019	nan	nan	nan		nan		ILD			lung_explant						nan	nan	nan	cells
TILD028	extension	Banovich_Kropski_2020	Banovich_Kropski_2020	TILD028	nan	nan	nan		nan		IPF			lung_explant						nan	nan	nan	cells
TILD030	extension	Banovich_Kropski_2020	Banovich_Kropski_2020	TILD030	nan	nan	nan		nan		Sarcoidosis			lung_explant						nan	nan	nan	cells
VUILD48	extension	Banovich_Kropski_2020	Banovich_Kropski_2020	VUILD48	nan	nan	nan		nan		NSIP			lung_explant						nan	nan	nan	cells
VUILD53	extension	Banovich_Kropski_2020	Banovich_Kropski_2020	VUILD53	nan	nan	nan		nan		IPF			lung_explant						nan	nan	nan	cells
VUILD54	extension	Banovich_Kropski_2020	Banovich_Kropski_2020	VUILD54	nan	nan	nan		nan		cHP			lung_explant						nan	nan	nan	cells
VUILD55	extension	Banovich_Kropski_2020	Banovich_Kropski_2020	VUILD55	nan	nan	nan		nan		NSIP			lung_explant						nan	nan	nan	cells
VUILD57	extension	Banovich_Kropski_2020	Banovich_Kropski_2020	VUILD57	nan	nan	nan		nan		Sarcoidosis			lung_explant						nan	nan	nan	cells
VUILD58	extension	Banovich_Kropski_2020	Banovich_Kropski_2020	VUILD58	nan	nan	nan		nan		cHP			lung_explant						nan	nan	nan	cells
VUILD59	extension	Banovich_Kropski_2020	Banovich_Kropski_2020	VUILD59	nan	nan	nan		nan		IPF			lung_explant						nan	nan	nan	cells
VUILD60	extension	Banovich_Kropski_2020	Banovich_Kropski_2020	VUILD60	nan	nan	nan		nan		IPF			lung_explant						nan	nan	nan	cells
VUILD61	extension	Banovich_Kropski_2020	Banovich_Kropski_2020	VUILD61	nan	nan	nan		nan		IPF			lung_explant						nan	nan	nan	cells
VUILD62	extension	Banovich_Kropski_2020	Banovich_Kropski_2020	VUILD62	nan	nan	nan		nan		NSIP			lung_explant						nan	nan	nan	cells
VUILD63	extension	Banovich_Kropski_2020	Banovich_Kropski_2020	VUILD63	nan	nan	nan		nan		IPF			lung_explant						nan	nan	nan	cells
VUILD64	extension	Banovich_Kropski_2020	Banovich_Kropski_2020	VUILD64	nan	nan	nan		nan		IPF			lung_explant						nan	nan	nan	cells
VUILD65	extension	Banovich_Kropski_2020	Banovich_Kropski_2020	VUILD65	nan	nan	nan		nan		IPF			lung_explant						nan	nan	nan	cells
BarbyUnpublished_sample_1	extension	Barbry_unpubl	Barbry_unpubl	D460	nan	nan	nan		nan		IPF			brush						nan	nan	nan	cells
BarbyUnpublished_sample_10	extension	Barbry_unpubl	Barbry_unpubl	D460	nan	nan	nan		nan		IPF			biopsy						nan	nan	nan	cells
BarbyUnpublished_sample_12	extension	Barbry_unpubl	Barbry_unpubl	D460	nan	nan	nan		nan		IPF			brush						nan	nan	nan	cells
BarbyUnpublished_sample_4	extension	Barbry_unpubl	Barbry_unpubl	D460	nan	nan	nan		nan		IPF			biopsy						nan	nan	nan	cells
BarbyUnpublished_sample_5	extension	Barbry_unpubl	Barbry_unpubl	D460	nan	nan	nan		nan		IPF			biopsy						nan	nan	nan	cells
BarbyUnpublished_sample_7	extension	Barbry_unpubl	Barbry_unpubl	D460	nan	nan	nan		nan		IPF			brush						nan	nan	nan	cells
BarbyUnpublished_sample_0	extension	Barbry_unpubl	Barbry_unpubl	D463	nan	nan	nan		nan		IPF			biopsy						nan	nan	nan	cells
BarbyUnpublished_sample_11	extension	Barbry_unpubl	Barbry_unpubl	D463	nan	nan	nan		nan		IPF			brush						nan	nan	nan	cells
BarbyUnpublished_sample_16	extension	Barbry_unpubl	Barbry_unpubl	D463	nan	nan	nan		nan		IPF			brush						nan	nan	nan	cells
BarbyUnpublished_sample_2	extension	Barbry_unpubl	Barbry_unpubl	D463	nan	nan	nan		nan		IPF			biopsy						nan	nan	nan	cells
BarbyUnpublished_sample_3	extension	Barbry_unpubl	Barbry_unpubl	D463	nan	nan	nan		nan		IPF			biopsy						nan	nan	nan	cells
BarbyUnpublished_sample_6	extension	Barbry_unpubl	Barbry_unpubl	D463	nan	nan	nan		nan		IPF			brush						nan	nan	nan	cells
Sample_15	extension	Budinger_2020	Budinger_2020	Case_1	27	female	latino		nan	25.2	COVID-19			autopsy						nan	nan	nan	cells
Sample_16	extension	Budinger_2020	Budinger_2020	Case_1	27	female	latino		nan	25.2	COVID-19			autopsy						nan	nan	nan	cells
Sample_17	extension	Budinger_2020	Budinger_2020	Case_1	27	female	latino		nan	25.2	COVID-19			autopsy						nan	nan	nan	cells
Sample_18	extension	Budinger_2020	Budinger_2020	Case_1	27	female	latino		nan	25.2	COVID-19			autopsy						nan	nan	nan	cells
Sample_10	extension	Budinger_2020	Budinger_2020	PMB_1	53	male	nan		nan		COVID-19			autopsy						nan	nan	nan	cells
Sample_7	extension	Budinger_2020	Budinger_2020	PMB_1	53	male	nan		nan		COVID-19			autopsy						nan	nan	nan	cells
Sample_8	extension	Budinger_2020	Budinger_2020	PMB_1	53	male	nan		nan		COVID-19			autopsy						nan	nan	nan	cells
Sample_9	extension	Budinger_2020	Budinger_2020	PMB_1	53	male	nan		nan		COVID-19			autopsy						nan	nan	nan	cells
Sample_19	extension	Budinger_2020	Budinger_2020	PMB_2	57	female	nan		nan		COVID-19			autopsy						nan	nan	nan	cells
Sample_20	extension	Budinger_2020	Budinger_2020	PMB_2	57	female	nan		nan		COVID-19			autopsy						nan	nan	nan	cells
Sample_21	extension	Budinger_2020	Budinger_2020	PMB_2	57	female	nan		nan		COVID-19			autopsy						nan	nan	nan	cells
Sample_22	extension	Budinger_2020	Budinger_2020	PMB_2	57	female	nan		nan		COVID-19			autopsy						nan	nan	nan	cells
Duong_lungMAP_unpubl_sample_0	extension	Duong_lungMAP_unpubl	Duong_lungMAP_unpubl	D239	37yo	male	black		hist of marijuana use		Healthy			lung_explant						airway	nan	nan	nuclei
Duong_lungMAP_unpubl_sample_1	extension	Duong_lungMAP_unpubl	Duong_lungMAP_unpubl	D239	37yo	male	black		hist of marijuana use		Healthy			lung_explant						airway	nan	nan	nuclei
Duong_lungMAP_unpubl_sample_2	extension	Duong_lungMAP_unpubl	Duong_lungMAP_unpubl	D239	37yo	male	black		hist of marijuana use		Healthy			lung_explant						parenchyma	nan	nan	nuclei
Duong_lungMAP_unpubl_sample_3	extension	Duong_lungMAP_unpubl	Duong_lungMAP_unpubl	D239	37yo	male	black		hist of marijuana use		Healthy			lung_explant						airway	nan	nan	nuclei
Duong_lungMAP_unpubl_sample_4	extension	Duong_lungMAP_unpubl	Duong_lungMAP_unpubl	D239	37yo	male	black		hist of marijuana use		Healthy			lung_explant						airway	nan	nan	nuclei
Duong_lungMAP_unpubl_sample_5	extension	Duong_lungMAP_unpubl	Duong_lungMAP_unpubl	D239	37yo	male	black		hist of marijuana use		Healthy			lung_explant						airway	nan	nan	nuclei
Duong_lungMAP_unpubl_sample_6	extension	Duong_lungMAP_unpubl	Duong_lungMAP_unpubl	D239	37yo	male	black		hist of marijuana use		Healthy			lung_explant						parenchyma	nan	nan	nuclei
Duong_lungMAP_unpubl_sample_7	extension	Duong_lungMAP_unpubl	Duong_lungMAP_unpubl	D239	37yo	male	black		hist of marijuana use		Healthy			lung_explant						parenchyma	nan	nan	nuclei
Duong_lungMAP_unpubl_sample_8	extension	Duong_lungMAP_unpubl	Duong_lungMAP_unpubl	D239	37yo	male	black		hist of marijuana use		Healthy			lung_explant						parenchyma	nan	nan	nuclei
101CV0ng	extension	Eils_2020	Eils_2020	101CV0ng	75	female	nan		never		Healthy			surgical_resection						nan	nan	nan	nuclei
16E0F2ng	extension	Eils_2020	Eils_2020	16E0F2ng	50	female	nan		never		Healthy			surgical_resection						nan	nan	nan	nuclei
1A1DFBng	extension	Eils_2020	Eils_2020	1A1DFBng	47	female	nan		active		Healthy			surgical_resection						nan	nan	nan	nuclei
9JQK55ng	extension	Eils_2020	Eils_2020	9JQK55ng	45	female	nan		active		Healthy			surgical_resection						nan	nan	nan	nuclei
A9LCTZng	extension	Eils_2020	Eils_2020	A9LCTZng	45	female	nan		never		Healthy			surgical_resection						nan	nan	nan	nuclei
JVV9L8ng	extension	Eils_2020	Eils_2020	JVV9L8ng	49	male	nan		never		Healthy			surgical_resection						nan	nan	nan	nuclei
KJYDM1ng	extension	Eils_2020	Eils_2020	KJYDM1ng	45	male	nan		never		Healthy			surgical_resection						nan	nan	nan	nuclei
ODGS1Mng	extension	Eils_2020	Eils_2020	ODGS1Mng	76	female	nan		never		Healthy			surgical_resection						nan	nan	nan	nuclei
QZY9VQng	extension	Eils_2020	Eils_2020	QZY9VQng	44	female	nan		active		Healthy			surgical_resection						nan	nan	nan	nuclei
S4ECX8ng	extension	Eils_2020	Eils_2020	S4ECX8ng	46	male	nan		never		Healthy			surgical_resection						nan	nan	nan	nuclei
SHMI57ng	extension	Eils_2020	Eils_2020	SHMI57ng	56	female	nan		never		Healthy			surgical_resection						nan	nan	nan	nuclei
ZM3KACng	extension	Eils_2020	Eils_2020	ZM3KACng	79	female	nan		never		Healthy			surgical_resection						nan	nan	nan	nuclei
BG9_12	extension	Gomperts_2021	Gomperts2021_UCLA	BG9_12	nan	nan	nan		nan		CF			lung_explant						nan	nan	nan	cells
BG9_18	extension	Gomperts_2021	Gomperts2021_UCLA	BG9_18	nan	nan	nan		nan		CF			lung_explant						nan	nan	nan	cells
BG9_19	extension	Gomperts_2021	Gomperts2021_UCLA	BG9_19	nan	nan	nan		nan		healthy			lung_explant						nan	nan	nan	cells
BG9_2	extension	Gomperts_2021	Gomperts2021_UCLA	BG9_2	nan	nan	nan		nan		healthy			lung_explant						nan	nan	nan	cells
BG9_20	extension	Gomperts_2021	Gomperts2021_UCLA	BG9_20	nan	nan	nan		nan		CF			lung_explant						nan	nan	nan	cells
BG9_21	extension	Gomperts_2021	Gomperts2021_UCLA	BG9_21	nan	nan	nan		nan		healthy			lung_explant						nan	nan	nan	cells
BG9_22	extension	Gomperts_2021	Gomperts2021_UCLA	BG9_22	nan	nan	nan		nan		healthy			lung_explant						nan	nan	nan	cells
BG9_23	extension	Gomperts_2021	Gomperts2021_UCLA	BG9_23	nan	nan	nan		nan		CF			lung_explant						nan	nan	nan	cells
BG9_24	extension	Gomperts_2021	Gomperts2021_UCLA	BG9_24	nan	nan	nan		nan		CF			lung_explant						nan	nan	nan	cells
BG9_25	extension	Gomperts_2021	Gomperts2021_UCLA	BG9_25	nan	nan	nan		nan		healthy			lung_explant						nan	nan	nan	cells
BG9_26	extension	Gomperts_2021	Gomperts2021_UCLA	BG9_26	nan	nan	nan		nan		CF			lung_explant						nan	nan	nan	cells
BG9_27	extension	Gomperts_2021	Gomperts2021_UCLA	BG9_27	nan	nan	nan		nan		CF			lung_explant						nan	nan	nan	cells
BG9_3	extension	Gomperts_2021	Gomperts2021_UCLA	BG9_3	nan	nan	nan		nan		healthy			lung_explant						nan	nan	nan	cells
BG9_30	extension	Gomperts_2021	Gomperts2021_UCLA	BG9_30	nan	nan	nan		nan		CF			lung_explant						nan	nan	nan	cells
BG9_31	extension	Gomperts_2021	Gomperts2021_UCLA	BG9_31	nan	nan	nan		nan		healthy			lung_explant						nan	nan	nan	cells
BG9_33	extension	Gomperts_2021	Gomperts2021_UCLA	BG9_33	nan	nan	nan		nan		healthy			lung_explant						nan	nan	nan	cells
BG9_34	extension	Gomperts_2021	Gomperts2021_UCLA	BG9_34	nan	nan	nan		nan		CF			lung_explant						nan	nan	nan	cells
BG9_35	extension	Gomperts_2021	Gomperts2021_UCLA	BG9_35	nan	nan	nan		nan		CF			lung_explant						nan	nan	nan	cells
BG9_36	extension	Gomperts_2021	Gomperts2021_UCLA	BG9_36	nan	nan	nan		nan		CF			lung_explant						nan	nan	nan	cells
BG9_37	extension	Gomperts_2021	Gomperts2021_UCLA	BG9_37	nan	nan	nan		nan		healthy			lung_explant						nan	nan	nan	cells
BG9_7	extension	Gomperts_2021	Gomperts2021_UCLA	BG9_7	nan	nan	nan		nan		CF			lung_explant						nan	nan	nan	cells
CF301018	extension	Gomperts_2021	Gomperts_2021_CFF	CF301018	nan	nan	nan		nan		CF			lung_explant						nan	nan	nan	cells
ND15656	extension	Gomperts_2021	Gomperts_2021_CFF	ND15656	nan	nan	nan		nan		CF			lung_explant						nan	nan	nan	cells
ND15989	extension	Gomperts_2021	Gomperts_2021_CFF	ND15989	nan	nan	nan		nan		healthy			lung_explant						nan	nan	nan	cells
ND16737	extension	Gomperts_2021	Gomperts_2021_CFF	ND16737	nan	nan	nan		nan		CF			lung_explant						nan	nan	nan	cells
ND17494	extension	Gomperts_2021	Gomperts_2021_CFF	ND17494	nan	nan	nan		nan		healthy			lung_explant						nan	nan	nan	cells
KKCFFT32N	extension	Gomperts_2021	Gomperts_2021_CSMC	KKCFFT32N	nan	nan	nan		nan		CF			lung_explant						nan	nan	nan	cells
KKD019N	extension	Gomperts_2021	Gomperts_2021_CSMC	KKD019N	nan	nan	nan		nan		CF			lung_explant						nan	nan	nan	cells
KKD020N	extension	Gomperts_2021	Gomperts_2021_CSMC	KKD020N	nan	nan	nan		nan		CF			lung_explant						nan	nan	nan	cells
KKD022N	extension	Gomperts_2021	Gomperts_2021_CSMC	KKD022N	nan	nan	nan		nan		CF			lung_explant						nan	nan	nan	cells
KKD023N	extension	Gomperts_2021	Gomperts_2021_CSMC	KKD023N	nan	nan	nan		nan		CF			lung_explant						nan	nan	nan	cells
KKD024N	extension	Gomperts_2021	Gomperts_2021_CSMC	KKD024N	nan	nan	nan		nan		CF			lung_explant						nan	nan	nan	cells
cc01p	extension	Gomperts_2021	Gomperts_2021_CSMC	cc01p	nan	nan	nan		nan		healthy			lung_explant						nan	nan	nan	cells
cc02p	extension	Gomperts_2021	Gomperts_2021_CSMC	cc02p	nan	nan	nan		nan		healthy			lung_explant						nan	nan	nan	cells
cc04p	extension	Gomperts_2021	Gomperts_2021_CSMC	cc04p	nan	nan	nan		nan		healthy			lung_explant						nan	nan	nan	cells
cc05p	extension	Gomperts_2021	Gomperts_2021_CSMC	cc05p	nan	nan	nan		nan		healthy			lung_explant						nan	nan	nan	cells
cf019	extension	Gomperts_2021	Gomperts_2021_CSMC	cf019	nan	nan	nan		nan		CF			lung_explant						nan	nan	nan	cells
dd09p	extension	Gomperts_2021	Gomperts_2021_CSMC	dd09p	nan	nan	nan		nan		healthy			lung_explant						nan	nan	nan	cells
dd10p	extension	Gomperts_2021	Gomperts_2021_CSMC	dd10p	nan	nan	nan		nan		healthy			lung_explant						nan	nan	nan	cells
dd39p	extension	Gomperts_2021	Gomperts_2021_CSMC	dd39p	nan	nan	nan		nan		healthy			lung_explant						nan	nan	nan	cells
dd49p	extension	Gomperts_2021	Gomperts_2021_CSMC	dd49p	nan	nan	nan		nan		healthy			lung_explant						nan	nan	nan	cells
h18	extension	Gomperts_2021	Gomperts_2021_CSMC	h18	nan	nan	nan		nan		healthy			lung_explant						nan	nan	nan	cells
PX10	extension	Janssen_2020	Janssen_2020	GSM4593897	nan	nan	nan		nan		Healthy			balf						nan	nan	nan	cells
PX9	extension	Janssen_2020	Janssen_2020	SAMN15153955	nan	nan	nan		nan		Healthy			balf						nan	nan	nan	cells
PX8	extension	Janssen_2020	Janssen_2020	SAMN15153956	nan	nan	nan		nan		Healthy			balf						nan	nan	nan	cells
PX7	extension	Janssen_2020	Janssen_2020	SAMN15153957	nan	nan	nan		nan		Healthy			balf						nan	nan	nan	cells
PX6	extension	Janssen_2020	Janssen_2020	SAMN15153958	nan	nan	nan		nan		Healthy			balf						nan	nan	nan	cells
PX5	extension	Janssen_2020	Janssen_2020	SAMN15153959	nan	nan	nan		nan		Healthy			balf						nan	nan	nan	cells
PX4	extension	Janssen_2020	Janssen_2020	SAMN15153960	nan	nan	nan		nan		Healthy			balf						nan	nan	nan	cells
PX3	extension	Janssen_2020	Janssen_2020	SAMN15153961	nan	nan	nan		nan		Healthy			balf						nan	nan	nan	cells
PX2	extension	Janssen_2020	Janssen_2020	SAMN15153962	nan	nan	nan		nan		Healthy			balf						nan	nan	nan	cells
PX1	extension	Janssen_2020	Janssen_2020	SAMN15153963	nan	nan	nan		nan		Healthy			balf						nan	nan	nan	cells
001C	extension	Kaminski_2020	Kaminski_2020	001C	nan	nan	nan		nan		healthy			donor_lung						nan	nan	nan	cells
002C	extension	Kaminski_2020	Kaminski_2020	002C	nan	nan	nan		nan		healthy			donor_lung						nan	nan	nan	cells
003C	extension	Kaminski_2020	Kaminski_2020	003C	nan	nan	nan		nan		healthy			donor_lung						nan	nan	nan	cells
010I	extension	Kaminski_2020	Kaminski_2020	010I	nan	nan	nan		nan		IPF			lung_explant						nan	nan	nan	cells
021I	extension	Kaminski_2020	Kaminski_2020	021I	nan	nan	nan		nan		IPF			lung_explant						nan	nan	nan	cells
022I	extension	Kaminski_2020	Kaminski_2020	022I	nan	nan	nan		nan		IPF			lung_explant						nan	nan	nan	cells
025I	extension	Kaminski_2020	Kaminski_2020	025I	nan	nan	nan		nan		IPF			lung_explant						nan	nan	nan	cells
034C	extension	Kaminski_2020	Kaminski_2020	034C	nan	nan	nan		nan		healthy			donor_lung						nan	nan	nan	cells
034I-a	extension	Kaminski_2020	Kaminski_2020	034I	nan	nan	nan		nan		IPF			lung_explant						nan	nan	nan	cells
040I	extension	Kaminski_2020	Kaminski_2020	040I	nan	nan	nan		nan		IPF			lung_explant						nan	nan	nan	cells
040I-b	extension	Kaminski_2020	Kaminski_2020	040I	nan	nan	nan		nan		IPF			lung_explant						nan	nan	nan	cells
041I-b	extension	Kaminski_2020	Kaminski_2020	041I	nan	nan	nan		nan		IPF			lung_explant						nan	nan	nan	cells
051I	extension	Kaminski_2020	Kaminski_2020	051I	nan	nan	nan		nan		IPF			lung_explant						nan	nan	nan	cells
051I-a	extension	Kaminski_2020	Kaminski_2020	051I	nan	nan	nan		nan		IPF			lung_explant						nan	nan	nan	cells
052CO-a	extension	Kaminski_2020	Kaminski_2020	052CO	nan	nan	nan		nan		COPD			lung_explant						nan	nan	nan	cells
053I	extension	Kaminski_2020	Kaminski_2020	053I	nan	nan	nan		nan		IPF			lung_explant						nan	nan	nan	cells
053I-d	extension	Kaminski_2020	Kaminski_2020	053I	nan	nan	nan		nan		IPF			lung_explant						nan	nan	nan	cells
053I-n	extension	Kaminski_2020	Kaminski_2020	053I	nan	nan	nan		nan		IPF			lung_explant						nan	nan	nan	cells
056CO	extension	Kaminski_2020	Kaminski_2020	056CO	nan	nan	nan		nan		COPD			lung_explant						nan	nan	nan	cells
063I-b	extension	Kaminski_2020	Kaminski_2020	063I	nan	nan	nan		nan		IPF			lung_explant						nan	nan	nan	cells
065C	extension	Kaminski_2020	Kaminski_2020	065C	nan	nan	nan		nan		healthy			donor_lung						nan	nan	nan	cells
081C	extension	Kaminski_2020	Kaminski_2020	081C	nan	nan	nan		nan		healthy			donor_lung						nan	nan	nan	cells
084C	extension	Kaminski_2020	Kaminski_2020	084C	nan	nan	nan		nan		healthy			donor_lung						nan	nan	nan	cells
092C	extension	Kaminski_2020	Kaminski_2020	092C	nan	nan	nan		nan		healthy			donor_lung						nan	nan	nan	cells
098C-a	extension	Kaminski_2020	Kaminski_2020	098C	nan	nan	nan		nan		healthy			donor_lung						nan	nan	nan	cells
098C-b	extension	Kaminski_2020	Kaminski_2020	098C	nan	nan	nan		nan		healthy			donor_lung						nan	nan	nan	cells
123I	extension	Kaminski_2020	Kaminski_2020	123I	nan	nan	nan		nan		IPF			lung_explant						nan	nan	nan	cells
133C-a	extension	Kaminski_2020	Kaminski_2020	133C	nan	nan	nan		nan		healthy			donor_lung						nan	nan	nan	cells
135I-a	extension	Kaminski_2020	Kaminski_2020	135I	nan	nan	nan		nan		IPF			lung_explant						nan	nan	nan	cells
135I-b	extension	Kaminski_2020	Kaminski_2020	135I	nan	nan	nan		nan		IPF			lung_explant						nan	nan	nan	cells
137C-a	extension	Kaminski_2020	Kaminski_2020	1372C	nan	nan	nan		nan		healthy			donor_lung						nan	nan	nan	cells
137C-b	extension	Kaminski_2020	Kaminski_2020	1372C	nan	nan	nan		nan		healthy			donor_lung						nan	nan	nan	cells
137C	extension	Kaminski_2020	Kaminski_2020	137C	nan	nan	nan		nan		healthy			donor_lung						nan	nan	nan	cells
137CO	extension	Kaminski_2020	Kaminski_2020	137CO	nan	nan	nan		nan		COPD			lung_explant						nan	nan	nan	cells
138I	extension	Kaminski_2020	Kaminski_2020	138I	nan	nan	nan		nan		IPF			lung_explant						nan	nan	nan	cells
138I-a	extension	Kaminski_2020	Kaminski_2020	138I	nan	nan	nan		nan		IPF			lung_explant						nan	nan	nan	cells
145I-a	extension	Kaminski_2020	Kaminski_2020	145I	nan	nan	nan		nan		IPF			lung_explant						nan	nan	nan	cells
152CO	extension	Kaminski_2020	Kaminski_2020	152CO	nan	nan	nan		nan		COPD			lung_explant						nan	nan	nan	cells
152CO-a	extension	Kaminski_2020	Kaminski_2020	152CO	nan	nan	nan		nan		COPD			lung_explant						nan	nan	nan	cells
153CO-a	extension	Kaminski_2020	Kaminski_2020	153CO	nan	nan	nan		nan		COPD			lung_explant						nan	nan	nan	cells
153CO-b	extension	Kaminski_2020	Kaminski_2020	153CO	nan	nan	nan		nan		COPD			lung_explant						nan	nan	nan	cells
157I	extension	Kaminski_2020	Kaminski_2020	157I	nan	nan	nan		nan		IPF			lung_explant						nan	nan	nan	cells
157I-a	extension	Kaminski_2020	Kaminski_2020	157I	nan	nan	nan		nan		IPF			lung_explant						nan	nan	nan	cells
157I-b	extension	Kaminski_2020	Kaminski_2020	157I	nan	nan	nan		nan		IPF			lung_explant						nan	nan	nan	cells
158I-b	extension	Kaminski_2020	Kaminski_2020	158I	nan	nan	nan		nan		IPF			lung_explant						nan	nan	nan	cells
160C	extension	Kaminski_2020	Kaminski_2020	160C	nan	nan	nan		nan		healthy			donor_lung						nan	nan	nan	cells
166I-a	extension	Kaminski_2020	Kaminski_2020	166I	nan	nan	nan		nan		IPF			lung_explant						nan	nan	nan	cells
174I-a	extension	Kaminski_2020	Kaminski_2020	174I	nan	nan	nan		nan		IPF			lung_explant						nan	nan	nan	cells
177I	extension	Kaminski_2020	Kaminski_2020	177I	nan	nan	nan		nan		IPF			lung_explant						nan	nan	nan	cells
178CO	extension	Kaminski_2020	Kaminski_2020	178CO	nan	nan	nan		nan		COPD			lung_explant						nan	nan	nan	cells
179I	extension	Kaminski_2020	Kaminski_2020	179I	nan	nan	nan		nan		IPF			lung_explant						nan	nan	nan	cells
184CO-a	extension	Kaminski_2020	Kaminski_2020	184CO	nan	nan	nan		nan		COPD			lung_explant						nan	nan	nan	cells
184CO-b	extension	Kaminski_2020	Kaminski_2020	184CO	nan	nan	nan		nan		COPD			lung_explant						nan	nan	nan	cells
186CO-b	extension	Kaminski_2020	Kaminski_2020	186CO	nan	nan	nan		nan		COPD			lung_explant						nan	nan	nan	cells
192C-a	extension	Kaminski_2020	Kaminski_2020	192C	nan	nan	nan		nan		healthy			donor_lung						nan	nan	nan	cells
92C	extension	Kaminski_2020	Kaminski_2020	192C	nan	nan	nan		nan		healthy			donor_lung						nan	nan	nan	cells
192CO	extension	Kaminski_2020	Kaminski_2020	192CO	nan	nan	nan		nan		COPD			lung_explant						nan	nan	nan	cells
192CO-a	extension	Kaminski_2020	Kaminski_2020	192CO	nan	nan	nan		nan		COPD			lung_explant						nan	nan	nan	cells
192CO-b	extension	Kaminski_2020	Kaminski_2020	192CO	nan	nan	nan		nan		COPD			lung_explant						nan	nan	nan	cells
193CO-a	extension	Kaminski_2020	Kaminski_2020	193CO	nan	nan	nan		nan		COPD			lung_explant						nan	nan	nan	cells
193CO-b	extension	Kaminski_2020	Kaminski_2020	193CO	nan	nan	nan		nan		COPD			lung_explant						nan	nan	nan	cells
194CO-a	extension	Kaminski_2020	Kaminski_2020	194CO	nan	nan	nan		nan		COPD			lung_explant						nan	nan	nan	cells
207CO	extension	Kaminski_2020	Kaminski_2020	207CO	nan	nan	nan		nan		COPD			lung_explant						nan	nan	nan	cells
208C	extension	Kaminski_2020	Kaminski_2020	208C	nan	nan	nan		nan		healthy			donor_lung						nan	nan	nan	cells
209I-a	extension	Kaminski_2020	Kaminski_2020	209I	nan	nan	nan		nan		IPF			lung_explant						nan	nan	nan	cells
210CO	extension	Kaminski_2020	Kaminski_2020	210I	nan	nan	nan		nan		IPF			lung_explant						nan	nan	nan	cells
212I-a	extension	Kaminski_2020	Kaminski_2020	212I	nan	nan	nan		nan		IPF			lung_explant						nan	nan	nan	cells
214I-a	extension	Kaminski_2020	Kaminski_2020	214I	nan	nan	nan		nan		IPF			lung_explant						nan	nan	nan	cells
217CO-a	extension	Kaminski_2020	Kaminski_2020	217CO	nan	nan	nan		nan		COPD			lung_explant						nan	nan	nan	cells
218C-a	extension	Kaminski_2020	Kaminski_2020	218C	nan	nan	nan		nan		healthy			donor_lung						nan	nan	nan	cells
218C-b	extension	Kaminski_2020	Kaminski_2020	218C	nan	nan	nan		nan		healthy			donor_lung						nan	nan	nan	cells
219C-a	extension	Kaminski_2020	Kaminski_2020	218C	nan	nan	nan		nan		healthy			donor_lung						nan	nan	nan	cells
219C-b	extension	Kaminski_2020	Kaminski_2020	218C	nan	nan	nan		nan		healthy			donor_lung						nan	nan	nan	cells
221I-a	extension	Kaminski_2020	Kaminski_2020	221I	nan	nan	nan		nan		IPF			lung_explant						nan	nan	nan	cells
022C-a	extension	Kaminski_2020	Kaminski_2020	222C	nan	nan	nan		nan		healthy			donor_lung						nan	nan	nan	cells
022C-b	extension	Kaminski_2020	Kaminski_2020	222C	nan	nan	nan		nan		healthy			donor_lung						nan	nan	nan	cells
222C	extension	Kaminski_2020	Kaminski_2020	222C	nan	nan	nan		nan		healthy			donor_lung						nan	nan	nan	cells
222I-a	extension	Kaminski_2020	Kaminski_2020	222I	nan	nan	nan		nan		IPF			lung_explant						nan	nan	nan	cells
222I-b	extension	Kaminski_2020	Kaminski_2020	222I	nan	nan	nan		nan		IPF			lung_explant						nan	nan	nan	cells
225I-a	extension	Kaminski_2020	Kaminski_2020	225I	nan	nan	nan		nan		IPF			lung_explant						nan	nan	nan	cells
225I-b	extension	Kaminski_2020	Kaminski_2020	225I	nan	nan	nan		nan		IPF			lung_explant						nan	nan	nan	cells
226C-a	extension	Kaminski_2020	Kaminski_2020	226C	nan	nan	nan		nan		healthy			donor_lung						nan	nan	nan	cells
226C-b	extension	Kaminski_2020	Kaminski_2020	226C	nan	nan	nan		nan		healthy			donor_lung						nan	nan	nan	cells
228I-a	extension	Kaminski_2020	Kaminski_2020	228I	nan	nan	nan		nan		IPF			lung_explant						nan	nan	nan	cells
228I-b	extension	Kaminski_2020	Kaminski_2020	228I	nan	nan	nan		nan		IPF			lung_explant						nan	nan	nan	cells
235CO	extension	Kaminski_2020	Kaminski_2020	235CO	nan	nan	nan		nan		COPD			lung_explant						nan	nan	nan	cells
237CO	extension	Kaminski_2020	Kaminski_2020	237CO	nan	nan	nan		nan		COPD			lung_explant						nan	nan	nan	cells
238CO	extension	Kaminski_2020	Kaminski_2020	238CO	nan	nan	nan		nan		COPD			lung_explant						nan	nan	nan	cells
23CO	extension	Kaminski_2020	Kaminski_2020	23CO	nan	nan	nan		nan		COPD			lung_explant						nan	nan	nan	cells
244C	extension	Kaminski_2020	Kaminski_2020	244C	nan	nan	nan		nan		healthy			donor_lung						nan	nan	nan	cells
253C	extension	Kaminski_2020	Kaminski_2020	253C	nan	nan	nan		nan		healthy			donor_lung						nan	nan	nan	cells
296C	extension	Kaminski_2020	Kaminski_2020	296C	nan	nan	nan		nan		healthy			donor_lung						nan	nan	nan	cells
29I	extension	Kaminski_2020	Kaminski_2020	29I	nan	nan	nan		nan		IPF			lung_explant						nan	nan	nan	cells
388C	extension	Kaminski_2020	Kaminski_2020	388C	nan	nan	nan		nan		healthy			donor_lung						nan	nan	nan	cells
396C	extension	Kaminski_2020	Kaminski_2020	396C	nan	nan	nan		nan		healthy			donor_lung						nan	nan	nan	cells
439C	extension	Kaminski_2020	Kaminski_2020	439C	nan	nan	nan		nan		healthy			donor_lung						nan	nan	nan	cells
439C-b	extension	Kaminski_2020	Kaminski_2020	439C	nan	nan	nan		nan		healthy			donor_lung						nan	nan	nan	cells
454C	extension	Kaminski_2020	Kaminski_2020	454C	nan	nan	nan		nan		healthy			donor_lung						nan	nan	nan	cells
465C	extension	Kaminski_2020	Kaminski_2020	465C	nan	nan	nan		nan		healthy			donor_lung						nan	nan	nan	cells
47I-a	extension	Kaminski_2020	Kaminski_2020	47I	nan	nan	nan		nan		IPF			lung_explant						nan	nan	nan	cells
47I-b	extension	Kaminski_2020	Kaminski_2020	47I	nan	nan	nan		nan		IPF			lung_explant						nan	nan	nan	cells
483C	extension	Kaminski_2020	Kaminski_2020	483C	nan	nan	nan		nan		healthy			donor_lung						nan	nan	nan	cells
484C	extension	Kaminski_2020	Kaminski_2020	484C	nan	nan	nan		nan		healthy			donor_lung						nan	nan	nan	cells
49I-a	extension	Kaminski_2020	Kaminski_2020	49I	nan	nan	nan		nan		IPF			lung_explant						nan	nan	nan	cells
49I-b	extension	Kaminski_2020	Kaminski_2020	49I	nan	nan	nan		nan		IPF			lung_explant						nan	nan	nan	cells
59I	extension	Kaminski_2020	Kaminski_2020	59I	nan	nan	nan		nan		IPF			lung_explant						nan	nan	nan	cells
8CO	extension	Kaminski_2020	Kaminski_2020	8CO	nan	nan	nan		nan		COPD			lung_explant						nan	nan	nan	cells
SSC 1	extension	Lafyatis_2019	Lafyatis_2019	SSc_1	67	female	nan		nan		Systematic sclerosis-associated ILD			lung_explant						nan	nan	nan	cells
SSC 2	extension	Lafyatis_2019	Lafyatis_2019	SSc_1	67	female	nan		nan		Systematic sclerosis-associated ILD			lung_explant						nan	nan	nan	cells
SSC 3	extension	Lafyatis_2019	Lafyatis_2019	SSc_2	43	male	nan		nan		Systematic sclerosis-associated ILD			lung_explant						nan	nan	nan	cells
SSC 4	extension	Lafyatis_2019	Lafyatis_2019	SSc_2	43	male	nan		nan		Systematic sclerosis-associated ILD			lung_explant						nan	nan	nan	cells
SSC 5	extension	Lafyatis_2019	Lafyatis_2019	SSc_3	53	male	nan		nan		Systematic sclerosis-associated ILD			lung_explant						nan	nan	nan	cells
SSC 6	extension	Lafyatis_2019	Lafyatis_2019	SSc_3	53	male	nan		nan		Systematic sclerosis-associated ILD			lung_explant						nan	nan	nan	cells
SSC 7	extension	Lafyatis_2019	Lafyatis_2019	SSc_4	64	male	nan		nan		Systematic sclerosis-associated ILD			lung_explant						nan	nan	nan	cells
SSC 8	extension	Lafyatis_2019	Lafyatis_2019	SSc_4	64	male	nan		nan		Systematic sclerosis-associated ILD			lung_explant						nan	nan	nan	cells
BAL001	extension	Lambrechts_2021	Lambrechts_2021	BAL001	nan	nan	nan		nan		Pneumonia non-COVID			balf						nan	nan	nan	cells
BAL002	extension	Lambrechts_2021	Lambrechts_2021	BAL002	nan	nan	nan		nan		Pneumonia non-COVID			balf						nan	nan	nan	cells
BAL003	extension	Lambrechts_2021	Lambrechts_2021	BAL003	nan	nan	nan		nan		Pneumonia non-COVID			balf						nan	nan	nan	cells
BAL009	extension	Lambrechts_2021	Lambrechts_2021	BAL009	nan	nan	nan		nan		COVID-19			balf						nan	nan	nan	cells
BAL010	extension	Lambrechts_2021	Lambrechts_2021	BAL010	nan	nan	nan		nan		Pneumonia non-COVID			balf						nan	nan	nan	cells
BAL011	extension	Lambrechts_2021	Lambrechts_2021	BAL011	nan	nan	nan		nan		Pneumonia non-COVID			balf						nan	nan	nan	cells
BAL012	extension	Lambrechts_2021	Lambrechts_2021	BAL012	nan	nan	nan		nan		COVID-19			balf						nan	nan	nan	cells
BAL013	extension	Lambrechts_2021	Lambrechts_2021	BAL013	nan	nan	nan		nan		COVID-19			balf						nan	nan	nan	cells
BAL014	extension	Lambrechts_2021	Lambrechts_2021	BAL014	nan	nan	nan		nan		COVID-19			balf						nan	nan	nan	cells
BAL015	extension	Lambrechts_2021	Lambrechts_2021	BAL015	nan	nan	nan		nan		COVID-19			balf						nan	nan	nan	cells
BAL016	extension	Lambrechts_2021	Lambrechts_2021	BAL016	nan	nan	nan		nan		COVID-19			balf						nan	nan	nan	cells
BAL017	extension	Lambrechts_2021	Lambrechts_2021	BAL017	nan	nan	nan		nan		Pneumonia non-COVID			balf						nan	nan	nan	cells
BAL018	extension	Lambrechts_2021	Lambrechts_2021	BAL018	nan	nan	nan		nan		Pneumonia non-COVID			balf						nan	nan	nan	cells
BAL019	extension	Lambrechts_2021	Lambrechts_2021	BAL019	nan	nan	nan		nan		Pneumonia non-COVID			balf						nan	nan	nan	cells
BAL020	extension	Lambrechts_2021	Lambrechts_2021	BAL020	nan	nan	nan		nan		COVID-19			balf						nan	nan	nan	cells
BAL021	extension	Lambrechts_2021	Lambrechts_2021	BAL021	nan	nan	nan		nan		COVID-19			balf						nan	nan	nan	cells
BAL022	extension	Lambrechts_2021	Lambrechts_2021	BAL022	nan	nan	nan		nan		COVID-19			balf						nan	nan	nan	cells
BAL023	extension	Lambrechts_2021	Lambrechts_2021	BAL023	nan	nan	nan		nan		COVID-19			balf						nan	nan	nan	cells
BAL024	extension	Lambrechts_2021	Lambrechts_2021	BAL024	nan	nan	nan		nan		COVID-19			balf						nan	nan	nan	cells
BAL025	extension	Lambrechts_2021	Lambrechts_2021	BAL025	nan	nan	nan		nan		COVID-19			balf						nan	nan	nan	cells
BAL026	extension	Lambrechts_2021	Lambrechts_2021	BAL026	nan	nan	nan		nan		COVID-19			balf						nan	nan	nan	cells
BAL027	extension	Lambrechts_2021	Lambrechts_2021	BAL027	nan	nan	nan		nan		COVID-19			balf						nan	nan	nan	cells
BAL028	extension	Lambrechts_2021	Lambrechts_2021	BAL028	nan	nan	nan		nan		Pneumonia non-COVID			balf						nan	nan	nan	cells
BAL029	extension	Lambrechts_2021	Lambrechts_2021	BAL029	nan	nan	nan		nan		Pneumonia non-COVID			balf						nan	nan	nan	cells
BAL030	extension	Lambrechts_2021	Lambrechts_2021	BAL030	nan	nan	nan		nan		Pneumonia non-COVID			balf						nan	nan	nan	cells
BAL031	extension	Lambrechts_2021	Lambrechts_2021	BAL031	nan	nan	nan		nan		COVID-19			balf						nan	nan	nan	cells
BAL032	extension	Lambrechts_2021	Lambrechts_2021	BAL032	nan	nan	nan		nan		COVID-19			balf						nan	nan	nan	cells
BAL033	extension	Lambrechts_2021	Lambrechts_2021	BAL033	nan	nan	nan		nan		COVID-19			balf						nan	nan	nan	cells
BAL034	extension	Lambrechts_2021	Lambrechts_2021	BAL034	nan	nan	nan		nan		COVID-19			balf						nan	nan	nan	cells
BAL035	extension	Lambrechts_2021	Lambrechts_2021	BAL035	nan	nan	nan		nan		COVID-19			balf						nan	nan	nan	cells
BAL036	extension	Lambrechts_2021	Lambrechts_2021	BAL036	nan	nan	nan		nan		Pneumonia non-COVID			balf						nan	nan	nan	cells
BAL037	extension	Lambrechts_2021	Lambrechts_2021	BAL037	nan	nan	nan		nan		COVID-19			balf						nan	nan	nan	cells
BAL038	extension	Lambrechts_2021	Lambrechts_2021	BAL038	nan	nan	nan		nan		Pneumonia non-COVID			balf						nan	nan	nan	cells
BAL039	extension	Lambrechts_2021	Lambrechts_2021	BAL039	nan	nan	nan		nan		COVID-19			balf						nan	nan	nan	cells
BAL040	extension	Lambrechts_2021	Lambrechts_2021	BAL040	nan	nan	nan		nan		COVID-19			balf						nan	nan	nan	cells
A26-LNG-1-SC-45N-5	extension	Meyer_2021	Meyer_2021_3prime	386C	nan	female	white		never	26.5	Healthy			donor_lung						nan	nan	nan	cells
A26-LNG-1-SC-45P-5	extension	Meyer_2021	Meyer_2021_3prime	386C	nan	female	white		never	26.5	Healthy			donor_lung						nan	nan	nan	cells
A26-LNG-1-SC-5	extension	Meyer_2021	Meyer_2021_3prime	386C	nan	female	white		never	26.5	Healthy			donor_lung						nan	nan	nan	cells
A26-LNG-2-SC-45N-5	extension	Meyer_2021	Meyer_2021_3prime	386C	nan	female	white		never	26.5	Healthy			donor_lung						nan	nan	nan	cells
A26-LNG-2-SC-45P-5	extension	Meyer_2021	Meyer_2021_3prime	386C	nan	female	white		never	26.5	Healthy			donor_lung						nan	nan	nan	cells
A26-LNG-2-SC-5	extension	Meyer_2021	Meyer_2021_3prime	386C	nan	female	white		never	26.5	Healthy			donor_lung						nan	nan	nan	cells
HCATisStab7732261	extension	Meyer_2021	Meyer_2021_3prime	386C	nan	female	white		never	26.5	Healthy			donor_lung						nan	nan	nan	cells
HCATisStab7732262	extension	Meyer_2021	Meyer_2021_3prime	386C	nan	female	white		never	26.5	Healthy			donor_lung						nan	nan	nan	cells
HCATisStab7732263	extension	Meyer_2021	Meyer_2021_3prime	386C	nan	female	white		never	26.5	Healthy			donor_lung						nan	nan	nan	cells
HCATisStab7732264	extension	Meyer_2021	Meyer_2021_3prime	386C	nan	female	white		never	26.5	Healthy			donor_lung						nan	nan	nan	cells
A32-LNG-1-SC-45N-1	extension	Meyer_2021	Meyer_2021_3prime	411C	nan	male	white		active	22	Healthy			donor_lung						nan	nan	nan	cells
A32-LNG-1-SC-45P-1	extension	Meyer_2021	Meyer_2021_3prime	411C	nan	male	white		active	22	Healthy			donor_lung						nan	nan	nan	cells
A32-LNG-2-SC-45N-1	extension	Meyer_2021	Meyer_2021_3prime	411C	nan	male	white		active	22	Healthy			donor_lung						nan	nan	nan	cells
A32-LNG-2-SC-45P-1	extension	Meyer_2021	Meyer_2021_3prime	411C	nan	male	white		active	22	Healthy			donor_lung						nan	nan	nan	cells
A37-LNG-1-SC-45N-1	extension	Meyer_2021	Meyer_2021_5prime	428C	nan	female	white		active	21.5	Healthy			donor_lung						nan	nan	nan	cells
A37-LNG-1-SC-45P-1	extension	Meyer_2021	Meyer_2021_5prime	428C	nan	female	white		active	21.5	Healthy			donor_lung						nan	nan	nan	cells
A37-LNG-2-SC-45N-1	extension	Meyer_2021	Meyer_2021_5prime	428C	nan	female	white		active	21.5	Healthy			donor_lung						nan	nan	nan	cells
A37-LNG-3-SC-45N-1	extension	Meyer_2021	Meyer_2021_5prime	428C	nan	female	white		active	21.5	Healthy			donor_lung						nan	nan	nan	cells
A37-LNG-3-SC-45P-1	extension	Meyer_2021	Meyer_2021_5prime	428C	nan	female	white		active	21.5	Healthy			donor_lung						nan	nan	nan	cells
A37-LNG-4-SC-45N-1	extension	Meyer_2021	Meyer_2021_5prime	428C	nan	female	white		active	21.5	Healthy			donor_lung						nan	nan	nan	cells
A37-LNG-4-SC-45N-2	extension	Meyer_2021	Meyer_2021_5prime	428C	nan	female	white		active	21.5	Healthy			donor_lung						nan	nan	nan	cells
A37-LNG-4-SC-45P-1	extension	Meyer_2021	Meyer_2021_5prime	428C	nan	female	white		active	21.5	Healthy			donor_lung						nan	nan	nan	cells
A37-LNG-4-SC-45P-2	extension	Meyer_2021	Meyer_2021_5prime	428C	nan	female	white		active	21.5	Healthy			donor_lung						nan	nan	nan	cells
A37-LNG-5-SC-45N-1	extension	Meyer_2021	Meyer_2021_5prime	428C	nan	female	white		active	21.5	Healthy			donor_lung						nan	nan	nan	cells
A37-LNG-5-SC-45P-1	extension	Meyer_2021	Meyer_2021_5prime	428C	nan	female	white		active	21.5	Healthy			donor_lung						nan	nan	nan	cells
A40-LNG-1-SC-45N-1	extension	Meyer_2021	Meyer_2021_5prime	453C	nan	male	white		active	39.1	Healthy			donor_lung						nan	nan	nan	cells
A40-LNG-1-SC-45P-1	extension	Meyer_2021	Meyer_2021_5prime	453C	nan	male	white		active	39.1	Healthy			donor_lung						nan	nan	nan	cells
A40-LNG-2-SC-45N-1	extension	Meyer_2021	Meyer_2021_5prime	453C	nan	male	white		active	39.1	Healthy			donor_lung						nan	nan	nan	cells
A40-LNG-2-SC-45P-1	extension	Meyer_2021	Meyer_2021_5prime	453C	nan	male	white		active	39.1	Healthy			donor_lung						nan	nan	nan	cells
A40-LNG-3-SC-45N-1	extension	Meyer_2021	Meyer_2021_5prime	453C	nan	male	white		active	39.1	Healthy			donor_lung						nan	nan	nan	cells
A40-LNG-3-SC-45P-1	extension	Meyer_2021	Meyer_2021_5prime	453C	nan	male	white		active	39.1	Healthy			donor_lung						nan	nan	nan	cells
A40-LNG-4-SC-45N-1	extension	Meyer_2021	Meyer_2021_5prime	453C	nan	male	white		active	39.1	Healthy			donor_lung						nan	nan	nan	cells
A40-LNG-4-SC-45P-1	extension	Meyer_2021	Meyer_2021_5prime	453C	nan	male	white		active	39.1	Healthy			donor_lung						nan	nan	nan	cells
A40-LNG-5-SC-45N-1	extension	Meyer_2021	Meyer_2021_5prime	453C	nan	male	white		active	39.1	Healthy			donor_lung						nan	nan	nan	cells
A40-LNG-5-SC-45P-1	extension	Meyer_2021	Meyer_2021_5prime	453C	nan	male	white		active	39.1	Healthy			donor_lung						nan	nan	nan	cells
A43-LNG-1-SC-45N-2	extension	Meyer_2021	Meyer_2021_5prime	464C	nan	male	white		active	21.6	Healthy			donor_lung						nan	nan	nan	cells
A43-LNG-2-SC-45N-2	extension	Meyer_2021	Meyer_2021_5prime	464C	nan	male	white		active	21.6	Healthy			donor_lung						nan	nan	nan	cells
A43-LNG-3-SC-45N-2	extension	Meyer_2021	Meyer_2021_5prime	464C	nan	male	white		active	21.6	Healthy			donor_lung						nan	nan	nan	cells
A43-LNG-5-SC-45N-2	extension	Meyer_2021	Meyer_2021_5prime	464C	nan	male	white		active	21.6	Healthy			donor_lung						nan	nan	nan	cells
A44-LNG-1-SC-45N-1	extension	Meyer_2021	Meyer_2021_5prime	466C	nan	male	white		active	24.5	Healthy			donor_lung						nan	nan	nan	cells
A44-LNG-1-SC-45P-1	extension	Meyer_2021	Meyer_2021_5prime	466C	nan	male	white		active	24.5	Healthy			donor_lung						nan	nan	nan	cells
A44-LNG-2-SC-45N-1	extension	Meyer_2021	Meyer_2021_5prime	466C	nan	male	white		active	24.5	Healthy			donor_lung						nan	nan	nan	cells
A44-LNG-2-SC-45P-1	extension	Meyer_2021	Meyer_2021_5prime	466C	nan	male	white		active	24.5	Healthy			donor_lung						nan	nan	nan	cells
A44-LNG-3-SC-45N-1	extension	Meyer_2021	Meyer_2021_5prime	466C	nan	male	white		active	24.5	Healthy			donor_lung						nan	nan	nan	cells
A44-LNG-3-SC-45P-1	extension	Meyer_2021	Meyer_2021_5prime	466C	nan	male	white		active	24.5	Healthy			donor_lung						nan	nan	nan	cells
A44-LNG-4-SC-45N-1	extension	Meyer_2021	Meyer_2021_5prime	466C	nan	male	white		active	24.5	Healthy			donor_lung						nan	nan	nan	cells
A44-LNG-4-SC-45P-1	extension	Meyer_2021	Meyer_2021_5prime	466C	nan	male	white		active	24.5	Healthy			donor_lung						nan	nan	nan	cells
A44-LNG-5-SC-45N-1	extension	Meyer_2021	Meyer_2021_5prime	466C	nan	male	white		active	24.5	Healthy			donor_lung						nan	nan	nan	cells
A44-LNG-5-SC-45P-1	extension	Meyer_2021	Meyer_2021_5prime	466C	nan	male	white		active	24.5	Healthy			donor_lung						nan	nan	nan	cells
A47-LNG-1-SC-1st-1	extension	Meyer_2021	Meyer_2021_5prime	490C	nan	female	white		never	20.4	Healthy			donor_lung						nan	nan	nan	cells
A47-LNG-1-SC-2nd-1	extension	Meyer_2021	Meyer_2021_5prime	490C	nan	female	white		never	20.4	Healthy			donor_lung						nan	nan	nan	cells
A47-LNG-2-SC-1st-1	extension	Meyer_2021	Meyer_2021_5prime	490C	nan	female	white		never	20.4	Healthy			donor_lung						nan	nan	nan	cells
A47-LNG-2-SC-2nd-1	extension	Meyer_2021	Meyer_2021_5prime	490C	nan	female	white		never	20.4	Healthy			donor_lung						nan	nan	nan	cells
A47-LNG-3-SC-1st-1	extension	Meyer_2021	Meyer_2021_5prime	490C	nan	female	white		never	20.4	Healthy			donor_lung						nan	nan	nan	cells
A47-LNG-3-SC-2nd-1	extension	Meyer_2021	Meyer_2021_5prime	490C	nan	female	white		never	20.4	Healthy			donor_lung						nan	nan	nan	cells
A47-LNG-4-SC-1st-1	extension	Meyer_2021	Meyer_2021_5prime	490C	nan	female	white		never	20.4	Healthy			donor_lung						nan	nan	nan	cells
A47-LNG-4-SC-2nd-1	extension	Meyer_2021	Meyer_2021_5prime	490C	nan	female	white		never	20.4	Healthy			donor_lung						nan	nan	nan	cells
A47-LNG-5-SC-1st-1	extension	Meyer_2021	Meyer_2021_5prime	490C	nan	female	white		never	20.4	Healthy			donor_lung						nan	nan	nan	cells
A47-LNG-5-SC-2nd-1	extension	Meyer_2021	Meyer_2021_5prime	490C	nan	female	white		never	20.4	Healthy			donor_lung						nan	nan	nan	cells
Cryobiopsy_01	extension	Misharin_Budinger_2018	Misharin_Budinger_2018	Cryobiopsy_01	nan	nan	nan		nan		IPF			biopsy_cryopreserved						nan	nan	nan	cells
HP_01	extension	Misharin_Budinger_2018	Misharin_Budinger_2018	HP_01	nan	nan	nan		nan		HP			lung_explant						nan	nan	nan	cells
IPF_01	extension	Misharin_Budinger_2018	Misharin_Budinger_2018	IPF_01	nan	nan	nan		nan		IPF			lung_explant						nan	nan	nan	cells
IPF_02	extension	Misharin_Budinger_2018	Misharin_Budinger_2018	IPF_02	nan	nan	nan		nan		IPF			lung_explant						nan	nan	nan	cells
IPF_03	extension	Misharin_Budinger_2018	Misharin_Budinger_2018	IPF_03	nan	nan	nan		nan		IPF			lung_explant						nan	nan	nan	cells
IPF_04	extension	Misharin_Budinger_2018	Misharin_Budinger_2018	IPF_04	nan	nan	nan		nan		IPF			lung_explant						nan	nan	nan	cells
Myositis-ILD_01	extension	Misharin_Budinger_2018	Misharin_Budinger_2018	Myositis-ILD_01	nan	nan	nan		nan		Myositis-associated ILD			lung_explant						nan	nan	nan	cells
SSc-ILD_01	extension	Misharin_Budinger_2018	Misharin_Budinger_2018	SSc-ILD_01	nan	nan	nan		nan		Systematic sclerosis-associated ILD			lung_explant						nan	nan	nan	cells
SSc-ILD_02	extension	Misharin_Budinger_2018	Misharin_Budinger_2018	SSc-ILD_02	nan	nan	nan		nan		Systematic sclerosis-associated ILD			lung_explant						nan	nan	nan	cells
PeerMassague2020_sample_0	extension	Peer_Massague_2020	Peer_Massague_2020	RU653	nan	nan	nan		nan		Lung adenocarcinoma			surgical_resection						nan	nan	nan	cells
PeerMassague2020_sample_1	extension	Peer_Massague_2020	Peer_Massague_2020	RU661	nan	nan	nan		nan		Lung adenocarcinoma			surgical_resection						nan	nan	nan	cells
PeerMassague2020_sample_3	extension	Peer_Massague_2020	Peer_Massague_2020	RU675	nan	nan	nan		nan		Tumor adjacent normal			surgical_resection						nan	nan	nan	cells
PeerMassague2020_sample_4	extension	Peer_Massague_2020	Peer_Massague_2020	RU675	nan	nan	nan		nan		Lung adenocarcinoma			surgical_resection						nan	nan	nan	cells
PeerMassague2020_sample_5	extension	Peer_Massague_2020	Peer_Massague_2020	RU676	nan	nan	nan		nan		Lung adenocarcinoma			surgical_resection						nan	nan	nan	cells
PeerMassague2020_sample_8	extension	Peer_Massague_2020	Peer_Massague_2020	RU679	nan	nan	nan		nan		Lung adenocarcinoma			surgical_resection						nan	nan	nan	cells
PeerMassague2020_sample_9	extension	Peer_Massague_2020	Peer_Massague_2020	RU680	nan	nan	nan		nan		Lung adenocarcinoma			surgical_resection						nan	nan	nan	cells
PeerMassague2020_sample_11	extension	Peer_Massague_2020	Peer_Massague_2020	RU682	nan	nan	nan		nan		Lung adenocarcinoma			surgical_resection						nan	nan	nan	cells
PeerMassague2020_sample_12	extension	Peer_Massague_2020	Peer_Massague_2020	RU682	nan	nan	nan		nan		Tumor adjacent normal			surgical_resection						nan	nan	nan	cells
PeerMassague2020_sample_13	extension	Peer_Massague_2020	Peer_Massague_2020	RU684	nan	nan	nan		nan		Lung adenocarcinoma			surgical_resection						nan	nan	nan	cells
PeerMassague2020_sample_14	extension	Peer_Massague_2020	Peer_Massague_2020	RU684	nan	nan	nan		nan		Tumor adjacent normal			surgical_resection						nan	nan	nan	cells
PeerMassague2020_sample_15	extension	Peer_Massague_2020	Peer_Massague_2020	RU685	nan	nan	nan		nan		Tumor adjacent normal			surgical_resection						nan	nan	nan	cells
D3_1	extension	Regev_2021	Regev_2021_Cryo	D3	nan	nan	nan		nan		COVID-19			autopsy_cryopreserved						nan	nan	nan	cells
D3_2	extension	Regev_2021	Regev_2021_Cryo	D3	nan	nan	nan		nan		COVID-19			autopsy_cryopreserved						nan	nan	nan	cells
D8_2	extension	Regev_2021	Regev_2021_Cryo	D8	nan	nan	nan		nan		COVID-19			autopsy_cryopreserved						nan	nan	nan	cells
D8_3	extension	Regev_2021	Regev_2021_Cryo	D8	nan	nan	nan		nan		COVID-19			autopsy_cryopreserved						nan	nan	nan	cells
D12_3	extension	Regev_2021	Regev_2021_Fresh	D12	nan	nan	nan		nan		COVID-19			autopsy						nan	nan	nan	cells
D12_4	extension	Regev_2021	Regev_2021_Fresh	D12	nan	nan	nan		nan		COVID-19			autopsy						nan	nan	nan	cells
D12_5	extension	Regev_2021	Regev_2021_Fresh	D12	nan	nan	nan		nan		COVID-19			autopsy						nan	nan	nan	cells
D1	extension	Regev_2021	Regev_2021_Nuclei	D1	nan	nan	nan		nan		COVID-19			autopsy						nan	nan	nan	nuclei
D10	extension	Regev_2021	Regev_2021_Nuclei	D10	nan	nan	nan		nan		COVID-19			autopsy						nan	nan	nan	nuclei
D11	extension	Regev_2021	Regev_2021_Nuclei	D11	nan	nan	nan		nan		COVID-19			autopsy						nan	nan	nan	nuclei
D12_1	extension	Regev_2021	Regev_2021_Nuclei	D12	nan	nan	nan		nan		COVID-19			autopsy						nan	nan	nan	nuclei
D12_2	extension	Regev_2021	Regev_2021_Nuclei	D12	nan	nan	nan		nan		COVID-19			autopsy						nan	nan	nan	nuclei
D13	extension	Regev_2021	Regev_2021_Nuclei	D13	nan	nan	nan		nan		COVID-19			autopsy						nan	nan	nan	nuclei
D14	extension	Regev_2021	Regev_2021_Nuclei	D14	nan	nan	nan		nan		COVID-19			autopsy						nan	nan	nan	nuclei
D15	extension	Regev_2021	Regev_2021_Nuclei	D15	nan	nan	nan		nan		COVID-19			autopsy						nan	nan	nan	nuclei
D16	extension	Regev_2021	Regev_2021_Nuclei	D16	nan	nan	nan		nan		COVID-19			autopsy						nan	nan	nan	nuclei
D17	extension	Regev_2021	Regev_2021_Nuclei	D17	nan	nan	nan		nan		COVID-19			autopsy						nan	nan	nan	nuclei
D2	extension	Regev_2021	Regev_2021_Nuclei	D2	nan	nan	nan		nan		COVID-19			autopsy						nan	nan	nan	nuclei
D3_3	extension	Regev_2021	Regev_2021_Nuclei	D3	nan	nan	nan		nan		COVID-19			autopsy						nan	nan	nan	nuclei
D4	extension	Regev_2021	Regev_2021_Nuclei	D4	nan	nan	nan		nan		COVID-19			autopsy						nan	nan	nan	nuclei
D5	extension	Regev_2021	Regev_2021_Nuclei	D5	nan	nan	nan		nan		COVID-19			autopsy						nan	nan	nan	nuclei
D6	extension	Regev_2021	Regev_2021_Nuclei	D6	nan	nan	nan		nan		COVID-19			autopsy						nan	nan	nan	nuclei
D7	extension	Regev_2021	Regev_2021_Nuclei	D7	nan	nan	nan		nan		COVID-19			autopsy						nan	nan	nan	nuclei
D8_1	extension	Regev_2021	Regev_2021_Nuclei	D8	nan	nan	nan		nan		COVID-19			autopsy						nan	nan	nan	nuclei
muc10380	extension	Schiller_2020	Schiller_2020	muc10380	73	male	nan		nan		healthy			surgical_resection						nan	nan	nan	cells
muc10381	extension	Schiller_2020	Schiller_2020	muc10381	51	male	nan		nan		Endstage lung fibrosis			lung_explant						nan	nan	nan	cells
muc3843	extension	Schiller_2020	Schiller_2020	muc3843	63	male	nan		nan		healthy			surgical_resection						nan	nan	nan	cells
muc4658	extension	Schiller_2020	Schiller_2020	muc4658	59	male	nan		nan		healthy			surgical_resection						nan	nan	nan	cells
muc4659	extension	Schiller_2020	Schiller_2020	muc4659	75	female	nan		nan		healthy			surgical_resection						nan	nan	nan	cells
muc5103	extension	Schiller_2020	Schiller_2020	muc5103	60	male	nan		nan		healthy			surgical_resection						nan	nan	nan	cells
muc5105	extension	Schiller_2020	Schiller_2020	muc5105	65	male	nan		nan		healthy			surgical_resection						nan	nan	nan	cells
muc5212	extension	Schiller_2020	Schiller_2020	muc5212	62	male	nan		nan		healthy			surgical_resection						nan	nan	nan	cells
muc5213	extension	Schiller_2020	Schiller_2020	muc5213	23	female	nan		nan		healthy			surgical_resection						nan	nan	nan	cells
muc5288	extension	Schiller_2020	Schiller_2020	muc5288	76	male	nan		nan		healthy			surgical_resection						nan	nan	nan	cells
muc8257_1	extension	Schiller_2020	Schiller_2020	muc8257	40	female	nan		nan		Endstage lung fibrosis			lung_explant						nan	nan	nan	cells
muc8257_2	extension	Schiller_2020	Schiller_2020	muc8257	40	female	nan		nan		Endstage lung fibrosis			lung_explant						nan	nan	nan	cells
muc9826	extension	Schiller_2020	Schiller_2020	muc9826	57	male	nan		nan		Endstage lung fibrosis			lung_explant						nan	nan	nan	cells
muc9832	extension	Schiller_2020	Schiller_2020	muc9832	81	female	nan		nan		healthy			surgical_resection						nan	nan	nan	cells
muc9833	extension	Schiller_2020	Schiller_2020	muc9833	52	female	nan		nan		healthy			surgical_resection						nan	nan	nan	cells
MUC24276	extension	Schiller_2021	Schiller_2021	Patient_1	21	female	nan		nan		Healthy			surgical_resection						nan	nan	nan	cells
MUC24280	extension	Schiller_2021	Schiller_2021	Patient_2	71	male	nan		nan		Healthy			surgical_resection						nan	nan	nan	cells
MUC28287	extension	Schiller_2021	Schiller_2021	Patient_3	62	female	nan		nan		Healthy			surgical_resection						nan	nan	nan	cells
MUC28289	extension	Schiller_2021	Schiller_2021	Patient_4	72	male	nan		nan		Healthy			surgical_resection						nan	nan	nan	cells
MUC28291	extension	Schiller_2021	Schiller_2021	Patient_5	81	male	nan		nan		Healthy			surgical_resection						nan	nan	nan	cells
MUC28292	extension	Schiller_2021	Schiller_2021	Patient_6	67	female	nan		nan		Healthy			surgical_resection						nan	nan	nan	cells
MUC28294	extension	Schiller_2021	Schiller_2021	Patient_7	65	female	nan		nan		Healthy			surgical_resection						nan	nan	nan	cells
Polyp19AEPI	extension	Shalek_2018	Shalek_2018	Shalek2018_subject_163	51	male	nan		nan		Chronic rhinitis			scraping						nan	nan	nan	cells
Polyp19BEPI	extension	Shalek_2018	Shalek_2018	Shalek2018_subject_163	51	male	nan		nan		Chronic rhinitis			scraping						nan	nan	nan	cells
Polyp1TOT	extension	Shalek_2018	Shalek_2018	Shalek2018_subject_298	56	male	nan		nan		Respiratory system disease			scraping						nan	nan	nan	cells
Polyp2TOT	extension	Shalek_2018	Shalek_2018	Shalek2018_subject_299	34	female	nan		nan		Respiratory system disease			scraping						nan	nan	nan	cells
Polyp3TOT	extension	Shalek_2018	Shalek_2018	Shalek2018_subject_305	31	female	nan		nan		Chronic rhinitis			scraping						nan	nan	nan	cells
Polyp4TOT	extension	Shalek_2018	Shalek_2018	Shalek2018_subject_308	40	female	nan		nan		Chronic rhinitis			scraping						nan	nan	nan	cells
Polyp5TOT	extension	Shalek_2018	Shalek_2018	Shalek2018_subject_310	53	female	nan		nan		Chronic rhinitis			scraping						nan	nan	nan	cells
Polyp6ATOT	extension	Shalek_2018	Shalek_2018	Shalek2018_subject_312	29	female	nan		nan		Chronic rhinitis			scraping						nan	nan	nan	cells
Polyp6BTOT	extension	Shalek_2018	Shalek_2018	Shalek2018_subject_312	29	female	nan		nan		Chronic rhinitis			scraping						nan	nan	nan	cells
Polyp7TOT	extension	Shalek_2018	Shalek_2018	Shalek2018_subject_316	35	female	nan		nan		Chronic rhinitis			scraping						nan	nan	nan	cells
Polyp8TOT	extension	Shalek_2018	Shalek_2018	Shalek2018_subject_317	29	female	nan		nan		Chronic rhinitis			scraping						nan	nan	nan	cells
Polyp9TOT	extension	Shalek_2018	Shalek_2018	Shalek2018_subject_318	31	female	nan		nan		Chronic rhinitis			scraping						nan	nan	nan	cells
Polyp11TOT	extension	Shalek_2018	Shalek_2018	Shalek2018_subject_320	55	female	nan		nan		Respiratory system disease			scraping						nan	nan	nan	cells
Polyp12TOT	extension	Shalek_2018	Shalek_2018	Shalek2018_subject_321	41	male	nan		nan		Chronic rhinitis			scraping						nan	nan	nan	cells
Polyp15AEPI	extension	Shalek_2018	Shalek_2018	Shalek2018_subject_356	24	male	nan		nan		Chronic rhinitis			scraping						nan	nan	nan	cells
Polyp14BEPI	extension	Shalek_2018	Shalek_2018	Shalek2018_subject_358	34	male	nan		nan		Chronic rhinitis			scraping						nan	nan	nan	cells
Polyp16BEPI	extension	Shalek_2018	Shalek_2018	Shalek2018_subject_359	43	female	nan		nan		Chronic rhinitis			scraping						nan	nan	nan	cells
Polyp13AEPI	extension	Shalek_2018	Shalek_2018	Shalek2018_subject_360	29	male	nan		nan		Chronic rhinitis			scraping						nan	nan	nan	cells
Polyp17AEPI	extension	Shalek_2018	Shalek_2018	Shalek2018_subject_361	60	female	nan		nan		Chronic rhinitis			scraping						nan	nan	nan	cells
Polyp17BEPI	extension	Shalek_2018	Shalek_2018	Shalek2018_subject_361	60	female	nan		nan		Chronic rhinitis			scraping						nan	nan	nan	cells
Polyp18CEPI	extension	Shalek_2018	Shalek_2018	Shalek2018_subject_362	24	female	nan		nan		Chronic rhinitis			scraping						nan	nan	nan	cells
IPF1_Lin	extension	Sheppard_2020	Sheppard_2020	IPF1	nan	nan	nan		nan		IPF			donor_lung						nan	nan	nan	cells
IPF2_All	extension	Sheppard_2020	Sheppard_2020	IPF2	nan	nan	nan		nan		IPF			donor_lung						nan	nan	nan	cells
IPF2_Lin	extension	Sheppard_2020	Sheppard_2020	IPF2	nan	nan	nan		nan		IPF			donor_lung						nan	nan	nan	cells
IPF3_All	extension	Sheppard_2020	Sheppard_2020	IPF3	nan	nan	nan		nan		IPF			donor_lung						nan	nan	nan	cells
IPF3_Lin	extension	Sheppard_2020	Sheppard_2020	IPF3	nan	nan	nan		nan		IPF			donor_lung						nan	nan	nan	cells
NML1_All	extension	Sheppard_2020	Sheppard_2020	NML1	nan	nan	nan		nan		Healthy			donor_lung						nan	nan	nan	cells
NML1_Lin	extension	Sheppard_2020	Sheppard_2020	NML1	nan	nan	nan		nan		Healthy			donor_lung						nan	nan	nan	cells
NML2_All	extension	Sheppard_2020	Sheppard_2020	NML2	nan	nan	nan		nan		Healthy			donor_lung						nan	nan	nan	cells
NML2_Lin	extension	Sheppard_2020	Sheppard_2020	NML2	nan	nan	nan		nan		Healthy			donor_lung						nan	nan	nan	cells
NML3_All	extension	Sheppard_2020	Sheppard_2020	NML3	nan	nan	nan		nan		Healthy			donor_lung						nan	nan	nan	cells
NML3_Lin	extension	Sheppard_2020	Sheppard_2020	NML3	nan	nan	nan		nan		Healthy			donor_lung						nan	nan	nan	cells
SCD1_All	extension	Sheppard_2020	Sheppard_2020	SCD1	nan	nan	nan		nan		Scleroderma			donor_lung						nan	nan	nan	cells
SCD1_Lin	extension	Sheppard_2020	Sheppard_2020	SCD1	nan	nan	nan		nan		Scleroderma			donor_lung						nan	nan	nan	cells
SCD2_All	extension	Sheppard_2020	Sheppard_2020	SCD2	nan	nan	nan		nan		Scleroderma			donor_lung						nan	nan	nan	cells
SCD2_Lin	extension	Sheppard_2020	Sheppard_2020	SCD2	nan	nan	nan		nan		Scleroderma			donor_lung						nan	nan	nan	cells
PP001	extension	Sims_2019	Sims_2019	Donor_1	nan	nan	nan		nan		Healthy			donor_lung						nan	nan	nan	cells
PP002	extension	Sims_2019	Sims_2019	Donor_1	nan	nan	nan		nan		anti-CD3 anti-CD28 antibody stimulated			donor_lung						nan	nan	nan	cells
PP009	extension	Sims_2019	Sims_2019	Donor_2	nan	nan	nan		nan		Healthy			donor_lung						nan	nan	nan	cells
PP010	extension	Sims_2019	Sims_2019	Donor_2	nan	nan	nan		nan		anti-CD3 anti-CD28 antibody stimulated			donor_lung						nan	nan	nan	cells
GSM4906351	extension	Sun_2020	Sun_2020_batch1	D139	3	female	nan		nan		Healthy			biopsy						nan	nan	nan	nuclei
GSM4906350	extension	Sun_2020	Sun_2020_batch2	D046	3	male	nan		nan		Healthy			biopsy						nan	nan	nan	nuclei
GSM4906353	extension	Sun_2020	Sun_2020_batch2	D175	31	female	nan		nan		Healthy			biopsy						nan	nan	nan	nuclei
GSM4906349	extension	Sun_2020	Sun_2020_batch3	D032	3	male	nan		nan		Healthy			biopsy						nan	nan	nan	nuclei
GSM4906348	extension	Sun_2020	Sun_2020_batch3	D062	0	male	nan		nan		Healthy			biopsy						nan	nan	nan	nuclei
GSM4906352	extension	Sun_2020	Sun_2020_batch3	D122	31	male	nan		nan		Healthy			biopsy						nan	nan	nan	nuclei
GSM4906347	extension	Sun_2020	Sun_2020_batch4	D088	0	female	nan		nan		Healthy			biopsy						nan	nan	nan	nuclei
GSM4906346	extension	Sun_2020	Sun_2020_batch4	D150	0	male	nan		nan		Healthy			biopsy						nan	nan	nan	nuclei
GSM4906354	extension	Sun_2020	Sun_2020_batch4	D231	31	female	nan		nan		Healthy			biopsy						nan	nan	nan	nuclei
BT1238	extension	Thienpont_2018	Thienpont_2018_10Xv1	lambrechts_1	nan	nan	nan		nan		Squamous Cell Carcinoma			surgical_resection						nan	nan	nan	cells
BT1239	extension	Thienpont_2018	Thienpont_2018_10Xv1	lambrechts_1	nan	nan	nan		nan		Squamous Cell Carcinoma			surgical_resection						nan	nan	nan	cells
BT1240	extension	Thienpont_2018	Thienpont_2018_10Xv1	lambrechts_1	nan	nan	nan		nan		Squamous Cell Carcinoma			surgical_resection						nan	nan	nan	cells
BT1241	extension	Thienpont_2018	Thienpont_2018_10Xv1	lambrechts_1	nan	nan	nan		nan		Squamous Cell Carcinoma			surgical_resection						nan	nan	nan	cells
BT1242	extension	Thienpont_2018	Thienpont_2018_10Xv1	lambrechts_1	nan	nan	nan		nan		Squamous Cell Carcinoma			surgical_resection						nan	nan	nan	cells
BT1243	extension	Thienpont_2018	Thienpont_2018_10Xv1	lambrechts_1	nan	nan	nan		nan		Squamous Cell Carcinoma			surgical_resection						nan	nan	nan	cells
BT1244	extension	Thienpont_2018	Thienpont_2018_10Xv1	lambrechts_2	nan	nan	nan		nan		Squamous Cell Carcinoma			surgical_resection						nan	nan	nan	cells
BT1245	extension	Thienpont_2018	Thienpont_2018_10Xv1	lambrechts_2	nan	nan	nan		nan		Squamous Cell Carcinoma			surgical_resection						nan	nan	nan	cells
BT1246	extension	Thienpont_2018	Thienpont_2018_10Xv1	lambrechts_2	nan	nan	nan		nan		Squamous Cell Carcinoma			surgical_resection						nan	nan	nan	cells
BT1247	extension	Thienpont_2018	Thienpont_2018_10Xv1	lambrechts_2	nan	nan	nan		nan		Squamous Cell Carcinoma			surgical_resection						nan	nan	nan	cells
BT1248	extension	Thienpont_2018	Thienpont_2018_10Xv1	lambrechts_2	nan	nan	nan		nan		Squamous Cell Carcinoma			surgical_resection						nan	nan	nan	cells
BT1249	extension	Thienpont_2018	Thienpont_2018_10Xv1	lambrechts_2	nan	nan	nan		nan		Squamous Cell Carcinoma			surgical_resection						nan	nan	nan	cells
BT1290	extension	Thienpont_2018	Thienpont_2018_10Xv2	lambrechts_3	nan	nan	nan		nan		Adenocarcinoma			surgical_resection						nan	nan	nan	cells
BT1291	extension	Thienpont_2018	Thienpont_2018_10Xv2	lambrechts_3	nan	nan	nan		nan		Adenocarcinoma			surgical_resection						nan	nan	nan	cells
BT1292	extension	Thienpont_2018	Thienpont_2018_10Xv2	lambrechts_3	nan	nan	nan		nan		Adenocarcinoma			surgical_resection						nan	nan	nan	cells
BT1293	extension	Thienpont_2018	Thienpont_2018_10Xv2	lambrechts_3	nan	nan	nan		nan		Adenocarcinoma			surgical_resection						nan	nan	nan	cells
BT1294	extension	Thienpont_2018	Thienpont_2018_10Xv2	lambrechts_4	nan	nan	nan		nan		Adenocarcinoma			surgical_resection						nan	nan	nan	cells
BT1295	extension	Thienpont_2018	Thienpont_2018_10Xv2	lambrechts_4	nan	nan	nan		nan		Adenocarcinoma			surgical_resection						nan	nan	nan	cells
BT1296	extension	Thienpont_2018	Thienpont_2018_10Xv2	lambrechts_4	nan	nan	nan		nan		Adenocarcinoma			surgical_resection						nan	nan	nan	cells
BT1297	extension	Thienpont_2018	Thienpont_2018_10Xv2	lambrechts_4	nan	nan	nan		nan		Adenocarcinoma			surgical_resection						nan	nan	nan	cells
BT1298	extension	Thienpont_2018	Thienpont_2018_10Xv2	lambrechts_5	nan	nan	nan		nan		Large Cell Carcinoma			surgical_resection						nan	nan	nan	cells
BT1299	extension	Thienpont_2018	Thienpont_2018_10Xv2	lambrechts_5	nan	nan	nan		nan		Large Cell Carcinoma			surgical_resection						nan	nan	nan	cells
BT1300	extension	Thienpont_2018	Thienpont_2018_10Xv2	lambrechts_5	nan	nan	nan		nan		Large Cell Carcinoma			surgical_resection						nan	nan	nan	cells
BT1301	extension	Thienpont_2018	Thienpont_2018_10Xv2	lambrechts_5	nan	nan	nan		nan		Large Cell Carcinoma			surgical_resection						nan	nan	nan	cells
BT1375	extension	Thienpont_2018	Thienpont_2018_10Xv2	lambrechts_6	nan	nan	nan		nan		Adenocarcinoma			surgical_resection						nan	nan	nan	cells
BT1376	extension	Thienpont_2018	Thienpont_2018_10Xv2	lambrechts_6	nan	nan	nan		nan		Adenocarcinoma			surgical_resection						nan	nan	nan	cells
BT1377	extension	Thienpont_2018	Thienpont_2018_10Xv2	lambrechts_6	nan	nan	nan		nan		Adenocarcinoma			surgical_resection						nan	nan	nan	cells
BT1378	extension	Thienpont_2018	Thienpont_2018_10Xv2	lambrechts_6	nan	nan	nan		nan		Adenocarcinoma			surgical_resection						nan	nan	nan	cells
scrBT1425	extension	Thienpont_2018	Thienpont_2018_10Xv2	lambrechts_7	nan	nan	nan		nan		Squamous Cell Carcinoma			surgical_resection						nan	nan	nan	cells
scrBT1426	extension	Thienpont_2018	Thienpont_2018_10Xv2	lambrechts_7	nan	nan	nan		nan		Squamous Cell Carcinoma			surgical_resection						nan	nan	nan	cells
scrBT1427	extension	Thienpont_2018	Thienpont_2018_10Xv2	lambrechts_7	nan	nan	nan		nan		Squamous Cell Carcinoma			surgical_resection						nan	nan	nan	cells
scrBT1428	extension	Thienpont_2018	Thienpont_2018_10Xv2	lambrechts_7	nan	nan	nan		nan		Squamous Cell Carcinoma			surgical_resection						nan	nan	nan	cells
scrBT1429	extension	Thienpont_2018	Thienpont_2018_10Xv2	lambrechts_8	nan	nan	nan		nan		Pleiomorphic Carcinoma			surgical_resection						nan	nan	nan	cells
scrBT1430	extension	Thienpont_2018	Thienpont_2018_10Xv2	lambrechts_8	nan	nan	nan		nan		Pleiomorphic Carcinoma			surgical_resection						nan	nan	nan	cells
scrBT1431	extension	Thienpont_2018	Thienpont_2018_10Xv2	lambrechts_8	nan	nan	nan		nan		Pleiomorphic Carcinoma			surgical_resection						nan	nan	nan	cells
scrBT1432	extension	Thienpont_2018	Thienpont_2018_10Xv2	lambrechts_8	nan	nan	nan		nan		Pleiomorphic Carcinoma			surgical_resection						nan	nan	nan	cells
Wunderink2021_sample_17	extension	Wunderink_2021	Wunderink_2021_cryo	Wunderink2021_subject_7	70.3703	female	nan		nan		COVID-19			balf_cryopreserved						nan	nan	nan	cells
Wunderink2021_sample_18	extension	Wunderink_2021	Wunderink_2021_cryo	Wunderink2021_subject_8	21.1164	male	nan		nan		COVID-19			balf_cryopreserved						nan	nan	nan	cells
Wunderink2021_sample_19	extension	Wunderink_2021	Wunderink_2021_cryo	Wunderink2021_subject_8	21.1164	male	nan		nan		COVID-19			balf_cryopreserved						nan	nan	nan	cells
Wunderink2021_sample_12	extension	Wunderink_2021	Wunderink_2021_cryo	Wunderink2021_subject_9	61.6558	female	nan		nan		COVID-19			balf_cryopreserved						nan	nan	nan	cells
Wunderink2021_sample_13	extension	Wunderink_2021	Wunderink_2021_cryo	Wunderink2021_subject_9	61.6558	female	nan		nan		COVID-19			balf_cryopreserved						nan	nan	nan	cells
Wunderink2021_sample_14	extension	Wunderink_2021	Wunderink_2021_cryo	Wunderink2021_subject_A	62.3703	male	nan		nan		COVID-19			balf_cryopreserved						nan	nan	nan	cells
Wunderink2021_sample_16	extension	Wunderink_2021	Wunderink_2021_cryo	Wunderink2021_subject_A	62.3703	male	nan		nan		COVID-19			balf_cryopreserved						nan	nan	nan	cells
Wunderink2021_sample_15	extension	Wunderink_2021	Wunderink_2021_cryo	Wunderink2021_subject_B	48.0542	male	nan		nan		COVID-19			balf_cryopreserved						nan	nan	nan	cells
Wunderink2021_sample_5	extension	Wunderink_2021	Wunderink_2021_fresh	Wunderink2021_subject_1	38.3101	male	nan		nan		COVID-19			balf						nan	nan	nan	cells
Wunderink2021_sample_6	extension	Wunderink_2021	Wunderink_2021_fresh	Wunderink2021_subject_1	38.3101	male	nan		nan		COVID-19			balf						nan	nan	nan	cells
Wunderink2021_sample_7	extension	Wunderink_2021	Wunderink_2021_fresh	Wunderink2021_subject_2	77.1767	male	nan		nan		COVID-19			balf						nan	nan	nan	cells
Wunderink2021_sample_3	extension	Wunderink_2021	Wunderink_2021_fresh	Wunderink2021_subject_3	72.5277	male	nan		nan		COVID-19			balf						nan	nan	nan	cells
Wunderink2021_sample_4	extension	Wunderink_2021	Wunderink_2021_fresh	Wunderink2021_subject_3	72.5277	male	nan		nan		COVID-19			balf						nan	nan	nan	cells
Wunderink2021_sample_1	extension	Wunderink_2021	Wunderink_2021_fresh	Wunderink2021_subject_4	64.0979	male	nan		nan		COVID-19			balf						nan	nan	nan	cells
Wunderink2021_sample_2	extension	Wunderink_2021	Wunderink_2021_fresh	Wunderink2021_subject_5	37.738	male	nan		nan		COVID-19			balf						nan	nan	nan	cells
LAM1	extension	Xu_2020	Xu_2020_LAM1_3	SAMN12574693	72	nan	nan		nan		Lymphangioleiomyomatosis			lung_explant						nan	nan	nan	cells
LAM3	extension	Xu_2020	Xu_2020_LAM1_3	SAMN12574699	50	nan	nan		nan		Lymphangioleiomyomatosis			lung_explant						nan	nan	nan	cells
HC1	extension	Zhang_2021	Zhang_2021	HC1	nan	nan	nan		nan		healthy			balf						nan	nan	nan	cells
HC2	extension	Zhang_2021	Zhang_2021	HC2	nan	nan	nan		nan		healthy			balf						nan	nan	nan	cells
HC3	extension	Zhang_2021	Zhang_2021	HC3	nan	nan	nan		nan		healthy			balf						nan	nan	nan	cells
M1	extension	Zhang_2021	Zhang_2021	M1	nan	nan	nan		nan		COVID-19 moderate			balf						nan	nan	nan	cells
M2	extension	Zhang_2021	Zhang_2021	M2	nan	nan	nan		nan		COVID-19 moderate			balf						nan	nan	nan	cells
M3	extension	Zhang_2021	Zhang_2021	M3	nan	nan	nan		nan		COVID-19 moderate			balf						nan	nan	nan	cells
S1	extension	Zhang_2021	Zhang_2021	S1	nan	nan	nan		nan		COVID-19 severe			balf						nan	nan	nan	cells
S2	extension	Zhang_2021	Zhang_2021	S2	nan	nan	nan		nan		COVID-19 severe			balf						nan	nan	nan	cells
S3	extension	Zhang_2021	Zhang_2021	S3	nan	nan	nan		nan		COVID-19 severe			balf						nan	nan	nan	cells
S4	extension	Zhang_2021	Zhang_2021	S4	nan	nan	nan		nan		COVID-19 severe			balf						nan	nan	nan	cells
S5	extension	Zhang_2021	Zhang_2021	S5	nan	nan	nan		nan		COVID-19 severe			balf						nan	nan	nan	cells
S6	extension	Zhang_2021	Zhang_2021	S6	nan	nan	nan		nan		COVID-19 severe			balf						nan	nan	nan	cells
