# Supplementary material for: An integrated cell atlas of the human lung in health and disease
Source: bioRxiv preprint, doi:10.1101/2022.03.10.483747, version 1 (2022-03-11)
Supplement: Extended Data Table 3 [file 483747_file04.xlsx]

## Sheet: Sheet1
Anatomical region (level 1)	Anatomical region (level 2)	CCF score
nose		0
	inferior turbinate	0
airway		0.36
	trachea	0.36
	trachea	0.36
	left or right main bronchus	0.5
	segmental bronchi	0.64
	lobular bronchi	0.72
	distal lobular airways	0.81
	bronchioles	0.97
parenchyma		0.97
