# Supplementary material for: An integrated cell atlas of the human lung in health and disease
Source: bioRxiv preprint, doi:10.1101/2022.03.10.483747, version 1 (2022-03-11)
Supplement: Extended Data Table 8 [file 483747_file09.xlsx]

## Sheet: Alveolar_fibroblasts
gene	pval	qval	log2fc	mean	zero_mean	grad	coef_mle	coef_sd	ll
CAMK2N1	0	0	-0.458696	1.26206	FALSE	3.36e-07	-0.458696	0.0544655	-4038.01
TINAGL1	0	0	1.51548	0.157854	FALSE	7.76e-08	1.51548	0.1577	-1079.6
MACF1	0	0	-0.772718	0.79313	FALSE	1.19e-06	-0.772718	0.0617077	-3050.88
PLPP3	0	0	-0.638655	1.66191	FALSE	4.96e-07	-0.638655	0.0508859	-4004.96
CTSK	0	0	0.737845	0.691239	FALSE	1.34e-08	0.737845	0.0715019	-2682.53
S100A16	0	0	-0.405568	1.56889	FALSE	9.24e-09	-0.405568	0.0479842	-4079.95
FMO2	0	0	-0.897542	0.379776	FALSE	1.55e-07	-0.897542	0.0921291	-2009.01
QSOX1	0	0	-0.519975	1.2142	FALSE	3.89e-07	-0.519975	0.0508161	-3638.58
RGS16	0	0	1.20422	0.639135	FALSE	7.64e-08	1.20422	0.123107	-2320.12
CSRP1	0	0	-0.42435	1.37283	FALSE	3.28e-07	-0.42435	0.0467495	-3877.29
G0S2	0	0	-1.4137	4.01544	FALSE	5.72e-08	-1.4137	0.0870246	-4728.73
LIMS1	0	0	-0.514101	1.22269	FALSE	9.84e-08	-0.514101	0.0510728	-3483.75
SCN7A	0	0	-0.627564	0.593979	FALSE	6.95e-07	-0.627564	0.0705542	-2598.78
COL3A1	0	0	0.747064	4.56619	FALSE	2.62e-08	0.747064	0.0440702	-6030.2
NABP1	0	0	-0.828624	0.407951	FALSE	5.71e-07	-0.828624	0.084518	-2107.81
FN1	0	0	-0.527214	4.71671	FALSE	3.1e-09	-0.527214	0.0376207	-6483.23
IGFBP2	0	0	1.33865	0.238518	FALSE	2.5e-08	1.33865	0.144349	-1403.92
LIMCH1	0	0	-0.877923	1.38402	FALSE	7.72e-08	-0.877923	0.0542439	-4000.83
IGFBP7	0	0	0.367189	9.51988	FALSE	1.83e-07	0.367189	0.0437628	-8230.74
SFRP2	0	0	1.12686	4.13354	FALSE	1.4e-09	1.12686	0.0653137	-5466.63
CPE	0	0	1.43726	0.254342	FALSE	5.9e-08	1.43726	0.127147	-1466.64
SEPP1	0	0	-0.563539	3.81436	FALSE	6.83e-08	-0.563539	0.0405515	-6283.45
MAP1B	0	0	0.897503	0.35083	FALSE	1.11e-07	0.897503	0.0976197	-1831.67
PDLIM4	0	0	0.945484	0.422231	FALSE	1.74e-07	0.945484	0.102796	-1922.03
SPARC	0	0	0.306698	4.35469	FALSE	3.08e-08	0.306698	0.0339224	-5909.36
FGFR4	0	0	-1.17182	0.420301	FALSE	3.14e-08	-1.17182	0.0821513	-1960.83
LAMA4	0	0	-0.624223	0.757237	FALSE	1.18e-06	-0.624223	0.0617246	-2877.28
TCF21	0	0	-0.469744	1.23504	FALSE	1.29e-08	-0.469744	0.0558651	-3702.42
INMT	0	0	-0.910619	0.591277	FALSE	1.59e-07	-0.910619	0.077786	-2594.8
SFRP4	0	0	1.85488	0.301814	FALSE	1.36e-08	1.85488	0.162888	-1288.44
COL1A2	0	0	0.324969	6.41451	FALSE	1.49e-07	0.324969	0.0327239	-6903.38
ZYX	0	0	-0.505153	1.06909	FALSE	5.05e-07	-0.505153	0.0535275	-3530.35
RARRES2	0	0	-0.340963	8.86569	FALSE	1.23e-07	-0.340963	0.0288604	-7807.76
SAT1	0	0	-0.413227	11.3736	FALSE	1.62e-08	-0.413227	0.0321996	-8446.41
IL13RA2	0	0	-0.929454	0.44809	FALSE	2.03e-08	-0.929454	0.104955	-1803.2
GPC3	0	0	-0.951907	1.6924	FALSE	6.67e-09	-0.951907	0.0548297	-4210.32
BGN	0	0	0.666627	2.23775	FALSE	1.36e-07	0.666627	0.0470914	-4640.13
CA3	0	0	-1.69533	0.7445	FALSE	4.83e-08	-1.69533	0.116477	-2424.79
CTHRC1	0	0	1.13263	0.405249	FALSE	2.86e-08	1.13263	0.105296	-1798.16
ANGPT1	0	0	-0.634182	0.517561	FALSE	3.78e-07	-0.634182	0.0756425	-2444.88
CCL21	0	0	1.99164	0.370513	FALSE	2.11e-08	1.99164	0.192906	-1227.15
ASPN	0	0	1.4143	0.420301	FALSE	5.67e-08	1.4143	0.122659	-1679.16
ADM	0	0	-0.841835	0.968738	FALSE	3.7e-09	-0.841835	0.0855751	-3074.36
CD44	0	0	-0.362455	1.88614	FALSE	4.42e-08	-0.362455	0.0425731	-4358.13
CD82	0	0	-0.496366	1.2995	FALSE	2.38e-07	-0.496366	0.0505101	-3810.46
TAGLN	0	0	0.647056	5.0768	FALSE	1.42e-09	0.647056	0.0477314	-6463.93
THY1	0	0	0.49828	1.97221	FALSE	2.7e-09	0.49828	0.0487364	-4332.85
ADAMTS8	0	0	-0.79917	0.36318	FALSE	4.54e-07	-0.79917	0.0885184	-1942.1
ITGA8	0	0	-0.578931	0.559244	FALSE	5.5e-08	-0.578931	0.0686715	-2478.64
SRGN	0	0	-0.585504	2.4203	FALSE	2e-07	-0.585504	0.0495201	-5003.97
ADIRF	0	0	0.634502	1.37785	FALSE	6.5e-08	0.634502	0.0679729	-4131.22
ACTA2	0	0	0.647608	1.94905	FALSE	3.46e-08	0.647608	0.0653382	-4323.74
CD9	0	0	0.486653	1.11193	FALSE	7.95e-08	0.486653	0.0584157	-3729.67
A2M	0	0	-0.454761	24.3118	FALSE	5.69e-10	-0.454761	0.0278829	-10071.2
SRGAP1	0	0	-0.589344	0.631416	FALSE	1.45e-07	-0.589344	0.0679105	-2548.1
RGCC	0	0	-0.57472	6.12543	FALSE	1.05e-09	-0.57472	0.0446127	-7050.32
THBS1	0	0	-0.489503	3.77499	FALSE	6.98e-08	-0.489503	0.0464662	-6133.95
EMP2	0	0	-0.531712	1.85102	FALSE	4.3e-08	-0.531712	0.045502	-4408.29
CRYM	0	0	283.913	0.00926283	FALSE	0.0499597	283.913	2.22e-162	0
CES1	0	0	-0.578417	3.81976	FALSE	3.52e-07	-0.578417	0.0385114	-5954.18
MYH10	0	0	-0.540707	0.706291	FALSE	9.96e-07	-0.540707	0.0627839	-2813.21
PMP22	0	0	-0.447891	4.17947	FALSE	1.03e-07	-0.447891	0.035372	-6105.5
MFAP4	0	0	-0.529373	6.94905	FALSE	1.65e-07	-0.529373	0.0343012	-7596.86
AOC3	0	0	-0.6727	0.463528	FALSE	2.51e-07	-0.6727	0.0744219	-2305.98
COL1A1	0	0	0.676389	4.17792	FALSE	2.22e-08	0.676389	0.0456463	-5877.49
COLEC12	0	0	-0.715723	0.425318	FALSE	5.42e-08	-0.715723	0.0761716	-2020.86
CST3	0	0	0.311887	6.42339	FALSE	5.13e-08	0.311887	0.0307908	-6948.01
MYL9	0	0	0.394166	2.9726	FALSE	1.35e-08	0.394166	0.0416046	-5514.79
CFD	0	0	-0.424908	18.8514	FALSE	2.84e-08	-0.424908	0.0375024	-9751.76
COMP	0	0	1.20723	0.435353	FALSE	7.24e-10	1.20723	0.142198	-1580.35
SPINT2	0	0	-0.916073	0.257816	FALSE	2.24e-07	-0.916073	0.106579	-1579.41
APOE	0	0	-0.631563	7.11463	FALSE	3.58e-08	-0.631563	0.0647587	-6922.85
MRAP	0	0	-1.49924	0.0930143	FALSE	8.99e-08	-1.49924	0.177854	-746.817
TAGLN2	2.22e-16	3.43e-14	-0.251921	4.1127	FALSE	4.25e-08	-0.251921	0.030743	-5832.15
SPON2	2.22e-16	3.43e-14	0.570844	0.871478	FALSE	4.57e-08	0.570844	0.0690193	-2901.97
WNT2	2.22e-16	3.43e-14	-0.707456	0.3956	FALSE	1.26e-07	-0.707456	0.0855727	-2020.81
AEBP1	4.44e-16	6.76e-14	0.431815	1.14743	FALSE	4.57e-07	0.431815	0.0531853	-3695.11
MAOB	6.66e-16	1e-13	-0.674431	0.362022	FALSE	6.35e-07	-0.674431	0.0835591	-1889.25
PTGDS	8.88e-16	1.32e-13	-0.309986	21.8846	FALSE	8.7e-10	-0.309986	0.0385368	-10214
CHN1	1.55e-15	2.28e-13	0.7974	0.282902	FALSE	2e-08	0.7974	0.0999272	-1703.37
PTMA	1.78e-15	2.57e-13	0.196701	14.8626	FALSE	3.08e-07	0.196701	0.0247427	-8789.49
MYO10	2e-15	2.82e-13	-0.952662	0.171362	FALSE	9.97e-08	-0.952662	0.119923	-1098.79
APLP2	2e-15	2.82e-13	-0.401812	1.05326	FALSE	8e-08	-0.401812	0.0505829	-3400.86
FIGF	2.22e-15	3.06e-13	-1.28119	0.170205	FALSE	1.81e-07	-1.28119	0.161577	-1174.12
LITAF	2.22e-15	3.06e-13	-0.299222	3.27634	FALSE	1.87e-07	-0.299222	0.0377563	-5603.52
FGF2	3.11e-15	4.24e-13	-0.757509	0.371285	FALSE	2.6e-09	-0.757509	0.096044	-1756.08
DNAH17	3.33e-15	4.49e-13	-1.3716	0.141258	FALSE	1.14e-08	-1.3716	0.174173	-921.675
FHL1	4e-15	5.26e-13	-0.34982	2.16789	FALSE	2.55e-07	-0.34982	0.0445203	-4818.16
HIF1A	4e-15	5.26e-13	-0.319608	2.19529	FALSE	8.83e-09	-0.319608	0.0406732	-4544.71
GPX3	8.44e-15	1.1e-12	-0.334362	3.53261	FALSE	1.87e-07	-0.334362	0.0430869	-6135.93
AC093673.5	8.88e-15	1.14e-12	-0.911763	0.177924	FALSE	2.71e-07	-0.911763	0.117583	-1255.08
GLRX	1.13e-14	1.44e-12	-0.6283	0.511	FALSE	1.42e-08	-0.6283	0.0813626	-2241.01
STEAP4	1.27e-14	1.6e-12	1.4971	0.128522	FALSE	2.33e-08	1.4971	0.194184	-915.95
S100A10	1.55e-14	1.94e-12	-0.277041	7.9973	FALSE	1.15e-08	-0.277041	0.0360612	-7455.29
CNN1	1.6e-14	1.97e-12	0.974995	0.343497	FALSE	7.29e-08	0.974995	0.126976	-1704.86
MAP2K3	1.64e-14	2.01e-12	-0.531466	0.653416	FALSE	1.4e-08	-0.531466	0.0692408	-2585.72
CD302	2.13e-14	2.58e-12	-0.533582	0.497877	FALSE	2.65e-07	-0.533582	0.0698236	-2339.48
MGST1	2.33e-14	2.76e-12	-0.434135	1.27055	FALSE	1.8e-07	-0.434135	0.0568894	-3403.22
HIC1	2.31e-14	2.76e-12	-0.774526	0.235044	FALSE	5.87e-08	-0.774526	0.101478	-1447.2
PRDX6	2.71e-14	3.08e-12	-0.298479	1.96025	FALSE	2.05e-07	-0.298479	0.0392165	-4344.25
HSD11B1	2.71e-14	3.08e-12	-0.654075	0.384794	FALSE	1.97e-08	-0.654075	0.0859372	-1883.97
GPNMB	2.66e-14	3.08e-12	0.632268	0.485527	FALSE	3.25e-09	0.632268	0.0830464	-2177.75
SERPING1	2.64e-14	3.08e-12	-0.229288	4.76843	FALSE	3.61e-08	-0.229288	0.0301107	-6283.21
MYADM	3.04e-14	3.43e-12	-0.371076	1.6924	FALSE	5.29e-07	-0.371076	0.0488458	-4290.11
RPS2	3.26e-14	3.64e-12	0.180523	12.5176	FALSE	1.82e-07	0.180523	0.0237933	-7982.19
HAS1	3.97e-14	4.4e-12	1.32308	0.170205	FALSE	5.91e-08	1.32308	0.174964	-934.56
NR4A3	5.15e-14	5.64e-12	-0.536667	0.694327	FALSE	9.84e-09	-0.536667	0.0712892	-2528.02
HSPA1A	8.02e-14	8.64e-12	0.378347	6.47356	FALSE	3.02e-09	0.378347	0.0506482	-7161.87
OGN	8.04e-14	8.64e-12	0.639905	0.455037	FALSE	8.12e-08	0.639905	0.0856655	-2327.88
SPTSSA	1.02e-13	1.09e-11	-0.330092	1.99614	FALSE	3.54e-08	-0.330092	0.0443779	-4593.24
GSN	1.09e-13	1.15e-11	0.365323	2.01274	FALSE	1.04e-07	0.365323	0.0491735	-4594.27
SMPDL3A	1.18e-13	1.24e-11	-0.547998	0.530297	FALSE	2.79e-07	-0.547998	0.0738689	-2428.26
FHL2	1.44e-13	1.5e-11	0.482928	0.801235	FALSE	5.6e-08	0.482928	0.0653272	-3061.78
HSPA1B	2.12e-13	2.18e-11	0.430155	2.47897	FALSE	2.81e-09	0.430155	0.0585947	-4829.14
TM4SF1	2.17e-13	2.21e-11	0.880408	0.61868	FALSE	3.72e-08	0.880408	0.119983	-2204.66
TGFBI	2.35e-13	2.38e-11	1.31895	0.104979	FALSE	1.06e-07	1.31895	0.180011	-798.127
PDGFRL	2.58e-13	2.59e-11	1.4838	0.0771903	FALSE	1.65e-07	1.4838	0.202854	-684.651
CFH	3.09e-13	3.07e-11	0.328307	2.55268	FALSE	1.62e-08	0.328307	0.0450328	-5350.2
ATP2B1	3.55e-13	3.5e-11	-0.550067	0.473562	FALSE	1.6e-07	-0.550067	0.0756467	-2033.95
NAMPT	5.52e-13	5.39e-11	-0.317925	2.1675	FALSE	7.71e-09	-0.317925	0.0440832	-4634.56
ANXA1	6.14e-13	5.94e-11	-0.266047	6.21112	FALSE	3.33e-08	-0.266047	0.0369641	-6723.19
ANGPTL4	6.21e-13	5.97e-11	-0.592482	1.044	FALSE	3.73e-08	-0.592482	0.0823382	-3291.1
LPL	7.49e-13	7.14e-11	-1.00912	0.159012	FALSE	2.37e-08	-1.00912	0.140738	-1050.36
CORO1C	7.56e-13	7.14e-11	-0.645755	0.277885	FALSE	6.97e-07	-0.645755	0.0900764	-1663.25
TGM2	8.76e-13	8.22e-11	-0.358033	1.73755	FALSE	8.86e-09	-0.358033	0.0500839	-4113.28
SGCA	8.91e-13	8.29e-11	-0.654172	0.338865	FALSE	7.76e-07	-0.654172	0.0915394	-1969.83
COL13A1	9.59e-13	8.86e-11	-0.973636	0.138557	FALSE	3.35e-07	-0.973636	0.136436	-1085.32
BMPER	1.05e-12	9.65e-11	-1.24922	0.0910845	FALSE	4.91e-08	-1.24922	0.175369	-769.168
TNFAIP6	1.66e-12	1.51e-10	-0.434386	2.15245	FALSE	4.59e-08	-0.434386	0.0615239	-4368.18
CRABP2	1.96e-12	1.77e-10	1.01765	0.152065	FALSE	1.43e-08	1.01765	0.144612	-1043.64
POSTN	2.81e-12	2.51e-10	0.799301	0.562717	FALSE	6.2e-09	0.799301	0.114399	-2045.55
CLU	2.85e-12	2.53e-10	0.385626	3.4724	FALSE	2.61e-09	0.385626	0.0552085	-5706.19
ZFP36L2	2.92e-12	2.58e-10	-0.341703	2.01698	FALSE	9.76e-08	-0.341703	0.0489455	-4721.98
RGS5	3.05e-12	2.67e-10	1.10565	0.247009	FALSE	1.18e-07	1.10565	0.158508	-1182.31
DPT	3.96e-12	3.44e-10	0.633795	0.528753	FALSE	1.53e-08	0.633795	0.091343	-2442.54
DUSP14	4.12e-12	3.55e-10	-0.508923	0.463142	FALSE	6.9e-08	-0.508923	0.0734048	-2234.03
FOXO3	4.41e-12	3.77e-10	-0.401074	0.815515	FALSE	7.79e-07	-0.401074	0.0579303	-2988.18
EMP1	4.57e-12	3.88e-10	-0.325031	4.4643	FALSE	5.26e-09	-0.325031	0.0469808	-6275.67
DKK3	6.8e-12	5.74e-10	-0.35791	1.19182	FALSE	1.9e-08	-0.35791	0.0521603	-3557.19
MGP	6.95e-12	5.82e-10	0.245496	20.7445	FALSE	2.72e-09	0.245496	0.0357932	-10029.1
MSRB2	7.13e-12	5.92e-10	-0.402616	0.764956	FALSE	1.01e-06	-0.402616	0.0587323	-2924.22
EPS8	7.86e-12	6.49e-10	0.811902	0.185257	FALSE	1.11e-07	0.811902	0.11868	-1261.16
NOTCH3	8.95e-12	7.33e-10	0.971615	0.137013	FALSE	8.54e-08	0.971615	0.142413	-1050.48
NOC2L	9.32e-12	7.59e-10	-0.590575	0.195291	FALSE	0.0251638	-0.590575	0.0866373	0
BMP5	1.09e-11	8.84e-10	-0.541835	0.407179	FALSE	3.95e-07	-0.541835	0.0797555	-2042
DES	1.16e-11	9.32e-10	1.28264	0.120417	FALSE	3.94e-08	1.28264	0.189039	-806.623
SMOC2	1.2e-11	9.58e-10	1.34097	0.0775762	FALSE	3.01e-08	1.34097	0.197782	-696.44
HIVEP3	1.31e-11	1.04e-09	-0.779863	0.190274	FALSE	2.36e-07	-0.779863	0.115236	-1255.26
ST3GAL1	1.32e-11	1.04e-09	-0.596319	0.297569	FALSE	3.65e-07	-0.596319	0.0881353	-1576.97
GDF10	1.38e-11	1.08e-09	-0.887446	0.184485	FALSE	1.36e-08	-0.887446	0.131272	-1172.14
HTRA1	1.75e-11	1.36e-09	0.572495	0.431494	FALSE	4.9e-08	0.572495	0.0851193	-2258.71
SDPR	1.97e-11	1.52e-09	-0.882224	0.165573	FALSE	1.18e-07	-0.882224	0.131514	-1161.98
DAAM1	2.01e-11	1.54e-09	-0.420457	0.703975	FALSE	4.44e-08	-0.420457	0.0627052	-2876.75
SLIT2	2.16e-11	1.65e-09	-0.624118	0.278271	FALSE	7.55e-08	-0.624118	0.093226	-1642.56
CCDC80	3.57e-11	2.7e-09	0.361534	2.13971	FALSE	5.89e-08	0.361534	0.0546047	-4809.8
SFTA1P	3.82e-11	2.86e-09	-0.558353	0.575068	FALSE	4.99e-08	-0.558353	0.0844617	-2682.16
MPHOSPH6	3.82e-11	2.86e-09	-0.553487	0.339251	FALSE	2.48e-07	-0.553487	0.0837226	-1948.85
ADAM17	4.59e-11	3.38e-09	-0.602444	0.283674	FALSE	2.69e-07	-0.602444	0.0915041	-1702.52
EMID1	4.58e-11	3.38e-09	-0.608961	0.259359	FALSE	1.66e-07	-0.608961	0.0924916	-1543.31
PTPRS	4.69e-11	3.44e-09	-0.667196	0.326901	FALSE	1.45e-07	-0.667196	0.101392	-1857.56
COL8A1	5.78e-11	4.21e-09	0.450721	0.936318	FALSE	1.09e-07	0.450721	0.0688183	-2936.39
FGF7	6.22e-11	4.5e-09	-0.284951	3.05403	FALSE	7.1e-09	-0.284951	0.0435823	-5210.74
DNAJB1	6.4e-11	4.6e-09	0.32302	2.76496	FALSE	2.04e-07	0.32302	0.0494363	-5370.41
IGF2BP2	7.62e-11	5.45e-09	-0.949596	0.115014	FALSE	1.26e-08	-0.949596	0.145914	-905.571
DIO2	7.76e-11	5.51e-09	1.18949	0.108066	FALSE	2.02e-08	1.18949	0.182853	-801.35
TNFRSF12A	8.29e-11	5.86e-09	-0.286	2.58433	FALSE	3.27e-07	-0.286	0.0440327	-5214.09
HOPX	1.44e-10	1.01e-08	1.18577	0.0984176	FALSE	5.49e-08	1.18577	0.184941	-759.107
DPYSL2	1.65e-10	1.15e-08	-0.341491	1.07912	FALSE	6.1e-07	-0.341491	0.0534311	-3623.71
GYPC	1.73e-10	1.2e-08	-0.321879	1.14087	FALSE	3.19e-07	-0.321879	0.0504246	-3600.59
DST	1.76e-10	1.21e-08	-0.339467	0.981474	FALSE	6.37e-07	-0.339467	0.0532	-3266.56
NEBL	1.82e-10	1.25e-08	-0.782269	0.165573	FALSE	1.99e-08	-0.782269	0.12269	-1144.64
ACTG1	1.83e-10	1.25e-08	-0.194741	8.63566	FALSE	3.15e-08	-0.194741	0.0305496	-7466.65
PDE4D	2.02e-10	1.37e-08	-0.486231	0.40988	FALSE	3.94e-08	-0.486231	0.0764578	-2032.61
PTX3	2.18e-10	1.47e-08	-0.968985	0.835199	FALSE	2.18e-08	-0.968985	0.152645	-1912.51
CHRDL1	2.2e-10	1.47e-08	-0.521246	0.356619	FALSE	7.11e-07	-0.521246	0.082125	-1830.06
ACSL4	2.75e-10	1.83e-08	-0.536319	0.406793	FALSE	1.65e-08	-0.536319	0.0849684	-1883.5
PYGL	2.94e-10	1.94e-08	-0.867511	0.113856	FALSE	1.78e-07	-0.867511	0.137654	-834.445
MT2A	3.45e-10	2.27e-08	-0.244414	49.1903	FALSE	4.26e-08	-0.244414	0.0389375	-12783
KLF10	3.67e-10	2.39e-08	-0.378208	0.818603	FALSE	3.31e-07	-0.378208	0.0603427	-3161.53
FBXO32	3.65e-10	2.39e-08	1.46334	0.0702431	FALSE	1.02e-09	1.46334	0.23345	-544.254
ELOVL5	3.87e-10	2.51e-08	-0.529544	0.335778	FALSE	2.48e-08	-0.529544	0.0846037	-1768.83
IGLC2	4.02e-10	2.59e-08	-1.78068	0.963721	FALSE	2.07e-08	-1.78068	0.284757	-1029.04
BNIP3	5.02e-10	3.22e-08	-0.522467	0.341567	FALSE	3.35e-07	-0.522467	0.084019	-1827.34
VIM	5.09e-10	3.25e-08	-0.145609	18.7059	FALSE	8.31e-08	-0.145609	0.0234241	-8900.19
CCBE1	5.82e-10	3.69e-08	-0.741977	0.169819	FALSE	5.96e-08	-0.741977	0.119765	-1199.48
DUSP1	6.8e-10	4.28e-08	-0.215477	10.2682	FALSE	2.79e-09	-0.215477	0.034919	-8173.62
LEPR	7.29e-10	4.57e-08	1.11124	0.102277	FALSE	3.68e-08	1.11124	0.180404	-773.1
HSPA2	7.39e-10	4.61e-08	-0.661106	0.218448	FALSE	8.66e-08	-0.661106	0.107366	-1356.55
SEMA3C	7.75e-10	4.81e-08	-0.601029	0.248167	FALSE	3.15e-08	-0.601029	0.0977283	-1450.93
TUBB2A	8.02e-10	4.95e-08	-0.359717	1.13894	FALSE	7.84e-09	-0.359717	0.0585419	-3304.26
CYB5A	8.2e-10	5.03e-08	-0.409929	0.544191	FALSE	1.29e-07	-0.409929	0.0667523	-2445.21
ID4	1.04e-09	6.37e-08	0.676668	0.328831	FALSE	6.95e-08	0.676668	0.110881	-1891.94
VGLL3	1.18e-09	7.17e-08	-0.652328	0.223852	FALSE	2.99e-08	-0.652328	0.10724	-1464.19
MCOLN3	1.3e-09	7.88e-08	-1.1728	0.0741027	FALSE	5.87e-08	-1.1728	0.19331	-689.262
PRG4	1.39e-09	8.38e-08	-0.792326	0.507912	FALSE	3.1e-09	-0.792326	0.13083	-1854.73
RSPO4	1.48e-09	8.83e-08	-1.05127	0.0798919	FALSE	1.67e-07	-1.05127	0.173853	-671.572
ADAMTS4	1.57e-09	9.29e-08	0.595515	0.432651	FALSE	4.36e-08	0.595515	0.0986426	-2051.39
INHBA	1.56e-09	9.29e-08	1.13584	0.233501	FALSE	1.1e-09	1.13584	0.188129	-989.059
SMAD3	1.72e-09	1.01e-07	-0.66934	0.180625	FALSE	2.41e-08	-0.66934	0.111149	-1168.22
LGALS1	1.8e-09	1.06e-07	0.15242	11.0857	FALSE	6.69e-08	0.15242	0.0253407	-7993.09
PPP1R14A	1.97e-09	1.15e-07	-0.352212	1.4203	FALSE	2.99e-07	-0.352212	0.0587028	-4154.56
ELMO1	2.05e-09	1.19e-07	-0.940738	0.0961019	FALSE	2.64e-07	-0.940738	0.156946	-823.112
GRK5	2.06e-09	1.19e-07	-0.638641	0.202239	FALSE	1.19e-07	-0.638641	0.106563	-1285.94
GJA5	2.15e-09	1.24e-07	-0.967615	0.0991895	FALSE	1.91e-08	-0.967615	0.161645	-757.092
ISYNA1	2.18e-09	1.25e-07	0.866886	0.123118	FALSE	1.1e-07	0.866886	0.144873	-977.972
SLC40A1	2.21e-09	1.26e-07	-0.465001	0.479352	FALSE	2.39e-07	-0.465001	0.0777354	-2363.32
B3GNT5	3.04e-09	1.72e-07	-1.15183	0.063296	FALSE	2.81e-08	-1.15183	0.194248	-584.397
HBEGF	3.13e-09	1.77e-07	-0.740928	0.23929	FALSE	2.56e-08	-0.740928	0.125063	-1365.9
ADH1B	3.17e-09	1.78e-07	-0.258131	3.01428	FALSE	1.25e-08	-0.258131	0.0435827	-5577.09
ADARB1	3.26e-09	1.82e-07	-0.726309	0.152065	FALSE	5.67e-07	-0.726309	0.122731	-1135.22
PLN	3.29e-09	1.83e-07	1.47011	0.0524894	FALSE	1.29e-07	1.47011	0.248473	-491.735
B2M	3.37e-09	1.86e-07	0.126921	22.0706	FALSE	1.72e-07	0.126921	0.021467	-9527.62
CLEC11A	4.02e-09	2.21e-07	0.334076	0.894635	FALSE	2.14e-07	0.334076	0.056783	-3249.87
OLFML3	4.19e-09	2.3e-07	-0.267104	1.79467	FALSE	1.09e-07	-0.267104	0.0454538	-4674.39
CHL1	4.37e-09	2.38e-07	-0.719549	0.152451	FALSE	8.19e-08	-0.719549	0.122593	-1015.47
F11R	5.5e-09	2.99e-07	-1.04259	0.0733308	FALSE	9.49e-08	-1.04259	0.178796	-632.969
C1QTNF1	5.83e-09	3.15e-07	0.897264	0.100347	FALSE	6.5e-08	0.897264	0.154128	-843.588
CYR61	6.19e-09	3.33e-07	-0.283812	6.53493	FALSE	5.33e-08	-0.283812	0.0488356	-7273.84
SLC16A7	6.28e-09	3.36e-07	-0.735528	0.153223	FALSE	1e-07	-0.735528	0.126616	-1058.38
LHFP	6.48e-09	3.45e-07	0.386288	0.598997	FALSE	7.62e-08	0.386288	0.0665563	-2665.24
PLS3	8.3e-09	4.4e-07	-0.410046	0.499421	FALSE	7.38e-07	-0.410046	0.0711596	-2323.33
COL12A1	8.47e-09	4.47e-07	1.40606	0.0509456	FALSE	9.67e-09	1.40606	0.244156	-461.814
FEZ1	8.74e-09	4.59e-07	-0.444078	0.424161	FALSE	9.06e-07	-0.444078	0.0771833	-2097.63
SLC25A37	8.91e-09	4.66e-07	-0.517641	0.297954	FALSE	4.35e-08	-0.517641	0.090019	-1692.43
METTL7A	1.05e-08	5.48e-07	-0.511367	0.304902	FALSE	3.23e-07	-0.511367	0.0893657	-1855.97
ALG2	1.07e-08	5.57e-07	-0.558672	0.224624	FALSE	9.16e-08	-0.558672	0.0976909	-1364.32
PHACTR3	1.16e-08	6.01e-07	-2.56684	0.023543	FALSE	5.27e-08	-2.56684	0.44994	-278.971
FBLN5	1.17e-08	6.02e-07	-0.355604	0.693169	FALSE	5.84e-07	-0.355604	0.0623448	-2825.43
SLC1A3	1.22e-08	6.23e-07	-1.00146	0.0779622	FALSE	7.78e-08	-1.00146	0.175774	-695.763
ANGPT2	1.26e-08	6.44e-07	1.70643	0.039753	FALSE	5.27e-09	1.70643	0.299854	-398.589
SERPINF1	1.32e-08	6.66e-07	0.168639	6.97067	FALSE	9.38e-08	0.168639	0.0296704	-7038.43
ICAM1	1.32e-08	6.66e-07	-0.366236	1.16403	FALSE	1.12e-08	-0.366236	0.0644337	-3392.23
CAV2	1.33e-08	6.69e-07	-0.36971	0.598611	FALSE	6.22e-07	-0.36971	0.0650642	-2578.52
AIFM2	1.37e-08	6.85e-07	-0.907261	0.0783481	FALSE	3.76e-08	-0.907261	0.159805	-643.101
SSTR2	1.55e-08	7.75e-07	1.19159	0.0683134	FALSE	2.38e-08	1.19159	0.21069	-610.425
PTP4A3	1.62e-08	8.04e-07	0.917972	0.118873	FALSE	1e-07	0.917972	0.162518	-887.018
TMX2	1.66e-08	8.2e-07	-0.509891	0.266692	FALSE	3.95e-07	-0.509891	0.0903469	-1594.83
IGFBP6	1.66e-08	8.2e-07	0.411992	0.6044	FALSE	8.63e-08	0.411992	0.0730005	-2626.32
ASPA	1.69e-08	8.28e-07	-0.998173	0.0744886	FALSE	4.54e-08	-0.998173	0.176943	-695.028
C12orf75	1.92e-08	9.38e-07	0.973428	0.0849093	FALSE	1.52e-07	0.973428	0.173237	-777.539
MCOLN2	1.97e-08	9.59e-07	-1.63052	0.0347356	FALSE	9.52e-08	-1.63052	0.290417	-367.05
KCNE4	2.01e-08	9.75e-07	1.1728	0.0621382	FALSE	1.95e-07	1.1728	0.209023	-575.534
EPB41L2	2.28e-08	1.1e-06	-0.384681	0.510614	FALSE	2.5e-07	-0.384681	0.0688246	-2372.16
OLFML2B	2.5e-08	1.2e-06	0.95184	0.0868391	FALSE	6.65e-09	0.95184	0.170783	-712.637
PHEX	2.51e-08	1.2e-06	-0.957576	0.0868391	FALSE	1.6e-07	-0.957576	0.171829	-726.407
PNPLA8	2.55e-08	1.22e-06	-0.434736	0.36897	FALSE	4.53e-08	-0.434736	0.0780548	-1846.08
HEBP1	2.71e-08	1.28e-06	-0.397001	0.46044	FALSE	5.43e-07	-0.397001	0.0714105	-2115.08
FHL5	2.83e-08	1.34e-06	1.64854	0.0362794	FALSE	5.23e-08	1.64854	0.296938	-385.557
HLA-B	2.91e-08	1.37e-06	0.235687	2.47202	FALSE	8.01e-07	0.235687	0.0424928	-5104.57
GFPT2	3.04e-08	1.43e-06	-0.45335	0.384408	FALSE	1.61e-07	-0.45335	0.0818444	-1921.34
LAMC1	3.15e-08	1.47e-06	-0.389114	0.473948	FALSE	5.42e-07	-0.389114	0.0703291	-2234.8
CXCL14	3.33e-08	1.55e-06	0.742731	0.749518	FALSE	3.66e-08	0.742731	0.134474	-2307.55
NDUFC2	3.55e-08	1.65e-06	-0.241969	1.36357	FALSE	7.54e-08	-0.241969	0.0439009	-3760.92
OMG	3.75e-08	1.73e-06	-0.73238	0.199923	FALSE	6.49e-08	-0.73238	0.1331	-1333
PDGFRB	3.92e-08	1.8e-06	0.472363	0.364338	FALSE	3.63e-08	0.472363	0.0859738	-1978.14
CXCL12	4.23e-08	1.94e-06	-0.29478	1.22655	FALSE	5.92e-08	-0.29478	0.0537807	-3819.69
VASN	4.36e-08	1.99e-06	-0.412287	0.46237	FALSE	2.61e-07	-0.412287	0.0752928	-2199.15
ADAM9	4.41e-08	2e-06	-0.446799	0.346198	FALSE	3.98e-07	-0.446799	0.0816296	-1905.66
THBS2	4.96e-08	2.25e-06	0.496254	0.353146	FALSE	3.38e-09	0.496254	0.0910119	-1781.94
TNFSF13B	5.26e-08	2.37e-06	-0.382953	0.740641	FALSE	1.48e-07	-0.382953	0.0703678	-2790.23
SCARB2	5.33e-08	2.39e-06	-0.29483	0.840988	FALSE	1e-06	-0.29483	0.0541967	-2956.65
NCALD	5.59e-08	2.5e-06	-0.569689	0.238132	FALSE	3.95e-07	-0.569689	0.104889	-1476.06
MMP19	5.78e-08	2.56e-06	-0.370979	0.626785	FALSE	6.68e-07	-0.370979	0.0683758	-2750.25
KANK3	5.77e-08	2.56e-06	-1.08035	0.0602084	FALSE	2.97e-07	-1.08035	0.19911	-610.527
AKAP9	5.87e-08	2.6e-06	-0.396467	0.465071	FALSE	2.97e-07	-0.396467	0.0731134	-2344.44
PLEKHH2	5.96e-08	2.62e-06	-0.410841	0.512157	FALSE	5.54e-07	-0.410841	0.0758007	-2495.33
FAM20A	5.95e-08	2.62e-06	-0.727177	0.123504	FALSE	4.81e-08	-0.727177	0.134161	-925.627
BAG2	6.15e-08	2.68e-06	-0.385916	0.526438	FALSE	2.29e-07	-0.385916	0.0712778	-2313.8
RSPO2	6.12e-08	2.68e-06	-1.19339	0.0486299	FALSE	1.95e-07	-1.19339	0.220379	-498.613
TGFBR2	6.47e-08	2.81e-06	-0.444843	0.331532	FALSE	2.92e-07	-0.444843	0.0822988	-1795.68
STEAP2	6.51e-08	2.81e-06	-0.373461	0.558472	FALSE	8.36e-07	-0.373461	0.0691064	-2528.71
NNMT	6.5e-08	2.81e-06	-0.16407	9.71864	FALSE	3.65e-08	-0.16407	0.0303576	-8082.17
MICALL2	6.63e-08	2.85e-06	-0.597283	0.178695	FALSE	5.4e-07	-0.597283	0.110587	-1262.34
LGMN	6.78e-08	2.9e-06	-0.416226	0.404863	FALSE	1.26e-07	-0.416226	0.0771231	-2095.41
SLC38A2	7.19e-08	3.06e-06	-0.295802	0.871864	FALSE	2e-07	-0.295802	0.0549164	-3198.4
TGIF1	7.35e-08	3.12e-06	-0.37603	0.516017	FALSE	4.85e-07	-0.37603	0.0698627	-2329.17
ITGA2	7.51e-08	3.18e-06	-0.646874	0.228483	FALSE	2.74e-09	-0.646874	0.120272	-1374.78
ISG15	7.83e-08	3.3e-06	0.538246	0.309147	FALSE	6.33e-08	0.538246	0.100213	-1691.12
CLIP4	8.19e-08	3.44e-06	-1.13506	0.0482439	FALSE	6.95e-08	-1.13506	0.211649	-475.195
MAMDC2	9.48e-08	3.97e-06	-0.429396	0.3956	FALSE	3.92e-07	-0.429396	0.0804664	-2004.44
TMEM170A	1.06e-07	4.43e-06	-0.664839	0.135469	FALSE	6.61e-08	-0.664839	0.125065	-1028.05
PPP1R14C	1.13e-07	4.69e-06	-1.84102	0.0297183	FALSE	1.86e-08	-1.84102	0.347092	-315.929
CALD1	1.13e-07	4.69e-06	0.173311	4.72752	FALSE	3.03e-08	0.173311	0.0326728	-6502.1
HSPB1	1.31e-07	5.42e-06	0.17855	5.81513	FALSE	1.13e-08	0.17855	0.0338361	-7008.87
OMD	1.39e-07	5.72e-06	1.00371	0.0771903	FALSE	3.67e-08	1.00371	0.190588	-674.541
RNF217	1.6e-07	6.56e-06	-0.770013	0.104593	FALSE	7.08e-08	-0.770013	0.146934	-865.571
MAN1C1	1.78e-07	7.27e-06	-0.754823	0.0976457	FALSE	4.95e-08	-0.754823	0.144578	-794.346
SYNPO2	1.86e-07	7.58e-06	0.80032	0.11347	FALSE	3.39e-08	0.80032	0.153538	-886.649
GPSM2	1.93e-07	7.83e-06	-0.670788	0.135469	FALSE	3.41e-08	-0.670788	0.128853	-1001.92
RPS27	2.01e-07	8.11e-06	0.128323	18.8005	FALSE	3.79e-07	0.128323	0.0246831	-9667.82
CCDC69	2.29e-07	9.21e-06	-0.841849	0.0825936	FALSE	1.11e-07	-0.841849	0.162692	-708.717
MGST3	2.38e-07	9.52e-06	-0.220282	1.68468	FALSE	1.58e-07	-0.220282	0.0426317	-4296.42
MIDN	2.38e-07	9.52e-06	-0.324406	0.72636	FALSE	2.76e-07	-0.324406	0.0627844	-2890.15
EPHX1	2.5e-07	9.97e-06	-0.296171	0.820533	FALSE	1.1e-07	-0.296171	0.0574227	-3168.46
SULT1A2	2.64e-07	1.05e-05	-1.07174	0.0521034	FALSE	1.09e-07	-1.07174	0.208199	-527.441
GSTK1	2.91e-07	1.15e-05	-0.307698	0.653802	FALSE	3.97e-07	-0.307698	0.0599908	-2694.51
PTGER2	2.96e-07	1.17e-05	-0.558492	0.224238	FALSE	2.86e-07	-0.558492	0.108947	-1470.51
INAFM1	3.03e-07	1.19e-05	0.395611	0.400618	FALSE	1.5e-07	0.395611	0.0772443	-2048.21
IGKC	3.09e-07	1.21e-05	-0.802225	0.703975	FALSE	4.52e-08	-0.802225	0.15675	-2006.66
SCRG1	3.25e-07	1.27e-05	1.83431	0.0285604	FALSE	1.51e-08	1.83431	0.359075	-306.998
SSPN	3.88e-07	1.51e-05	0.351582	0.516017	FALSE	1.06e-07	0.351582	0.0692776	-2396.39
EPB41L3	4.13e-07	1.6e-05	-0.795282	0.0918564	FALSE	1.57e-07	-0.795282	0.157088	-758.468
FAM184A	4.23e-07	1.63e-05	-0.85109	0.0775762	FALSE	7.7e-08	-0.85109	0.168249	-705.9
AVPI1	4.23e-07	1.63e-05	-0.680193	0.137399	FALSE	3.28e-07	-0.680193	0.134465	-1013.96
COL10A1	4.52e-07	1.74e-05	1.13734	0.0972597	FALSE	4.61e-09	1.13734	0.225416	-581.651
CBLB	4.71e-07	1.81e-05	-0.459108	0.274411	FALSE	6.92e-07	-0.459108	0.0911363	-1660.7
TMBIM6	4.77e-07	1.81e-05	-0.226849	1.26708	FALSE	1.62e-06	-0.226849	0.0450506	-3614.48
VMP1	4.73e-07	1.81e-05	-0.294378	0.98765	FALSE	4.93e-07	-0.294378	0.0584437	-3575.59
PROCR	4.86e-07	1.84e-05	1.35979	0.039367	FALSE	9.05e-08	1.35979	0.270234	-367.884
ZBTB43	4.91e-07	1.86e-05	-0.61728	0.146662	FALSE	4.84e-08	-0.61728	0.122728	-1028.98
MARCKS	5.41e-07	2.04e-05	-0.294853	0.870706	FALSE	4.28e-07	-0.294853	0.0588376	-3289.7
TNXB	5.65e-07	2.12e-05	-0.312821	0.755307	FALSE	9.76e-08	-0.312821	0.0625272	-3073.77
CD81	5.69e-07	2.13e-05	-0.26585	1.04052	FALSE	5.66e-08	-0.26585	0.0531535	-3588.37
PDE3B	5.96e-07	2.22e-05	-0.65528	0.126592	FALSE	4.51e-07	-0.65528	0.131251	-998.766
PAMR1	6.15e-07	2.29e-05	1.04754	0.0594365	FALSE	1.05e-07	1.04754	0.210084	-532.179
MAP3K8	6.39e-07	2.37e-05	-0.490748	0.2555	FALSE	2.19e-08	-0.490748	0.0985639	-1555.5
ITM2A	6.52e-07	2.41e-05	1.62736	0.0347356	FALSE	9.53e-09	1.62736	0.327094	-321.581
GJA4	6.63e-07	2.43e-05	1.26783	0.0590506	FALSE	1.28e-08	1.26783	0.255004	-500.93
LMNA	6.6e-07	2.43e-05	-0.168771	10.582	FALSE	1.72e-08	-0.168771	0.0339387	-8064.5
TNFRSF21	6.66e-07	2.43e-05	-0.623617	0.137399	FALSE	2.68e-07	-0.623617	0.125453	-1021.21
PCOLCE	6.61e-07	2.43e-05	0.204971	2.08645	FALSE	3.37e-08	0.204971	0.0412221	-4614.79
CSNK1A1	6.75e-07	2.46e-05	-0.248615	1.00618	FALSE	9.89e-08	-0.248615	0.0500392	-3265.06
PIM1	6.87e-07	2.49e-05	-0.420196	0.478966	FALSE	5.59e-08	-0.420196	0.0846325	-2333.57
RTN4	6.91e-07	2.5e-05	-0.176344	2.92898	FALSE	3.09e-07	-0.176344	0.035525	-5037.22
FHOD1	7.69e-07	2.77e-05	-0.570675	0.163257	FALSE	3.58e-07	-0.570675	0.115449	-1161.32
TANK	7.78e-07	2.8e-05	-0.434806	0.297183	FALSE	1.1e-07	-0.434806	0.0880022	-1742.45
NPNT	7.92e-07	2.84e-05	-0.569204	0.197607	FALSE	2.43e-08	-0.569204	0.115283	-1352.16
ABCC3	8.1e-07	2.89e-05	-1.01331	0.0532613	FALSE	3.42e-07	-1.01331	0.205413	-534.156
IFNGR1	8.17e-07	2.91e-05	-0.331773	0.553068	FALSE	9.11e-08	-0.331773	0.0672785	-2569.99
PGAP2	8.19e-07	2.91e-05	-1.04676	0.0571208	FALSE	7.45e-08	-1.04676	0.212287	-560.675
PDHA1	8.51e-07	3.01e-05	-0.4635	0.238904	FALSE	5.94e-07	-0.4635	0.0941444	-1484.31
FRZB	8.73e-07	3.08e-05	0.43813	0.388267	FALSE	1.03e-07	0.43813	0.0890809	-2113.53
CD46	8.84e-07	3.11e-05	-0.424586	0.30027	FALSE	9.99e-08	-0.424586	0.0863722	-1689.66
SLC38A5	9.01e-07	3.16e-05	-0.345125	0.486685	FALSE	5.47e-07	-0.345125	0.0702589	-2203.91
PRKCB	9.25e-07	3.24e-05	-0.849112	0.0775762	FALSE	2.16e-07	-0.849112	0.173042	-704.903
FMO3	9.98e-07	3.48e-05	-0.596412	0.17831	FALSE	2.19e-07	-0.596412	0.121914	-1247.3
MCL1	1.1e-06	3.83e-05	-0.21089	2.04902	FALSE	3.13e-07	-0.21089	0.0432786	-4403.72
OAF	1.12e-06	3.88e-05	0.453238	0.306445	FALSE	4.01e-08	0.453238	0.093079	-1652.61
SRSF10	1.16e-06	4.02e-05	-0.319127	0.547279	FALSE	1.92e-07	-0.319127	0.0656382	-2488.74
CERS2	1.21e-06	4.16e-05	-0.457255	0.24122	FALSE	9.07e-07	-0.457255	0.0941908	-1543.99
TPBG	1.24e-06	4.27e-05	0.617904	0.147433	FALSE	2.18e-08	0.617904	0.127434	-1045.95
TBX3	1.25e-06	4.28e-05	0.684571	0.112698	FALSE	8.18e-08	0.684571	0.141208	-888.1
MDFI	1.32e-06	4.5e-05	-0.445614	0.287148	FALSE	2.55e-08	-0.445614	0.0921192	-1670.04
ADGRF5	1.33e-06	4.52e-05	1.27586	0.0439985	FALSE	2.51e-08	1.27586	0.263846	-438.347
TIMP3	1.33e-06	4.53e-05	-0.220799	3.84408	FALSE	7.13e-10	-0.220799	0.0456676	-5905.81
RAD21	1.35e-06	4.59e-05	-0.39183	0.21922	FALSE	0.0296699	-0.39183	0.0810982	0
CARHSP1	1.38e-06	4.65e-05	-0.342228	0.518333	FALSE	8.94e-08	-0.342228	0.070895	-2499.32
MT1E	1.38e-06	4.65e-05	-0.258366	3.533	FALSE	1.26e-07	-0.258366	0.0535188	-6377.35
HIGD1B	1.38e-06	4.65e-05	0.983707	0.102277	FALSE	2.27e-08	0.983707	0.20374	-743.505
ACVR1B	1.41e-06	4.72e-05	-0.908415	0.0559629	FALSE	1.19e-07	-0.908415	0.18832	-549.601
B4GALT4	1.45e-06	4.86e-05	-0.781906	0.0768043	FALSE	1.62e-07	-0.781906	0.162306	-658.728
SFPQ	1.48e-06	4.93e-05	-0.240904	1.17175	FALSE	4.96e-07	-0.240904	0.0500435	-3621.6
PID1	1.56e-06	5.17e-05	-0.589133	0.149749	FALSE	8.48e-08	-0.589133	0.122639	-1071.64
DUSP23	1.59e-06	5.26e-05	-0.460583	0.251254	FALSE	1.19e-07	-0.460583	0.0959612	-1590.4
F2R	1.6e-06	5.27e-05	0.590703	0.205712	FALSE	1.19e-08	0.590703	0.123111	-1251.46
MYH9	1.6e-06	5.27e-05	0.411202	0.339637	FALSE	8.92e-08	0.411202	0.0856996	-1850.72
SH2D4A	1.66e-06	5.47e-05	-1.08542	0.047472	FALSE	6.37e-08	-1.08542	0.226583	-428.754
SOD2	1.7e-06	5.56e-05	-0.23202	4.29178	FALSE	1e-08	-0.23202	0.0484737	-5966.24
RP3-525N10.2	1.74e-06	5.68e-05	-1.46654	0.0301042	FALSE	8.45e-08	-1.46654	0.306707	-358.557
KAZN	1.79e-06	5.83e-05	-0.514489	0.191046	FALSE	1.79e-08	-0.514489	0.107729	-1236.81
MYH11	1.82e-06	5.9e-05	0.747258	0.149749	FALSE	3.54e-08	0.747258	0.156583	-1029.64
LUC7L3	1.82e-06	5.9e-05	-0.32658	0.519105	FALSE	2.38e-07	-0.32658	0.0684334	-2462.06
TNFRSF1A	1.87e-06	6.04e-05	-0.228174	1.18294	FALSE	1.27e-06	-0.228174	0.0478641	-3635.93
FABP4	1.97e-06	6.35e-05	1.28869	0.0903126	FALSE	7.48e-08	1.28869	0.270938	-597.174
SLC16A1-AS1	2e-06	6.42e-05	-0.667128	0.119259	FALSE	6.56e-08	-0.667128	0.140343	-954.688
SIRPA	2.08e-06	6.66e-05	-0.711022	0.0899267	FALSE	1.87e-07	-0.711022	0.149826	-710.442
MMP11	2.1e-06	6.7e-05	1.61757	0.0486299	FALSE	9.55e-09	1.61757	0.340989	-329.051
EHD1	2.23e-06	7.12e-05	-0.539336	0.174064	FALSE	1.6e-07	-0.539336	0.114001	-1191.87
LGI4	2.37e-06	7.5e-05	0.897342	0.0845233	FALSE	3.91e-08	0.897342	0.19014	-783.667
RCN3	2.36e-06	7.5e-05	0.391077	0.331532	FALSE	1.95e-07	0.391077	0.0828631	-1853.51
PNRC2	2.45e-06	7.73e-05	-0.318288	0.512929	FALSE	1.36e-07	-0.318288	0.0675501	-2385.8
CDH11	2.45e-06	7.73e-05	-0.253697	0.982246	FALSE	3.77e-07	-0.253697	0.0538345	-3269.18
KLF4	2.67e-06	8.39e-05	-0.274599	1.66885	FALSE	6.34e-09	-0.274599	0.0584897	-4071.52
DNTTIP2	2.7e-06	8.46e-05	-0.486125	0.215361	FALSE	9.52e-08	-0.486125	0.103597	-1300.16
CASS4	2.72e-06	8.49e-05	-0.934316	0.0578927	FALSE	3.7e-08	-0.934316	0.199165	-577.115
VAV2	2.75e-06	8.58e-05	-0.730227	0.0906986	FALSE	2.71e-07	-0.730227	0.155744	-776.605
NTNG1	2.79e-06	8.69e-05	-1.06942	0.0451563	FALSE	3.13e-08	-1.06942	0.228246	-474.238
CD36	3.17e-06	9.84e-05	1.108	0.07912	FALSE	1.71e-08	1.108	0.237804	-643.051
HSD17B12	3.23e-06	0.0001	-0.415518	0.285218	FALSE	1.79e-07	-0.415518	0.0892533	-1721.13
CTNNAL1	3.49e-06	0.000107695	-0.376837	0.365882	FALSE	4.99e-07	-0.376837	0.0812219	-1892.41
CP	3.75e-06	0.000115239	-0.964096	0.0694712	FALSE	1.21e-07	-0.964096	0.208451	-608.464
NDUFA4	3.94e-06	0.000120395	-0.157047	2.92127	FALSE	9.03e-08	-0.157047	0.0340321	-5151.59
PPIF	3.92e-06	0.000120395	-0.525256	0.161328	FALSE	6.53e-08	-0.525256	0.113806	-1086.48
CD40	3.94e-06	0.000120395	-0.527693	0.167117	FALSE	1.91e-07	-0.527693	0.11436	-1187.57
CASP4	4.05e-06	0.000123228	-0.338346	0.450791	FALSE	1.21e-07	-0.338346	0.0734105	-2226.18
TSPAN3	4.26e-06	0.000129413	-0.336189	0.448475	FALSE	1.92e-07	-0.336189	0.0731129	-2251.43
SORL1	4.53e-06	0.000137355	-1.02869	0.0436125	FALSE	1.94e-07	-1.02869	0.224349	-450.022
C5orf15	4.61e-06	0.000139352	-0.36597	0.35083	FALSE	7.98e-07	-0.36597	0.0798766	-1956.02
THBD	4.64e-06	0.000139701	1.5274	0.0382092	FALSE	9.8e-09	1.5274	0.333448	-336.442
ID2	4.73e-06	0.000142088	-0.258066	1.27904	FALSE	3.91e-08	-0.258066	0.0563887	-3995.55
IL6ST	4.76e-06	0.000142681	-0.239363	0.966036	FALSE	1.63e-06	-0.239363	0.052318	-3288.21
COX4I2	4.78e-06	0.0001429	0.662724	0.163257	FALSE	4.03e-08	0.662724	0.14488	-1146.23
TPM3	4.82e-06	0.000143857	-0.27799	0.630259	FALSE	8.61e-08	-0.27799	0.0607979	-2536.22
BAMBI	4.88e-06	0.000145332	-0.696475	0.116171	FALSE	4.78e-08	-0.696475	0.152412	-861.634
CDR1-AS	5.06e-06	0.00015021	-0.879246	0.0532613	FALSE	1.19e-07	-0.879246	0.192723	-479.27
ALDH9A1	5.59e-06	0.000165422	-0.404654	0.270938	FALSE	1.73e-07	-0.404654	0.0891031	-1576.72
GGT5	5.81e-06	0.000171603	0.418125	0.292937	FALSE	2.98e-08	0.418125	0.0922373	-1670.57
FAM107B	5.86e-06	0.000172701	-0.385673	0.321112	FALSE	6.72e-08	-0.385673	0.0851137	-1774.81
SVEP1	5.89e-06	0.000173098	-0.6	0.12775	FALSE	1.07e-07	-0.6	0.132443	-1047.28
SLIT3	6.06e-06	0.000177613	-0.364614	0.364338	FALSE	3.32e-07	-0.364614	0.0805905	-2001.56
GPM6B	6.13e-06	0.000179136	-0.44725	0.293709	FALSE	3.67e-08	-0.44725	0.0989067	-1786.46
LMOD1	6.2e-06	0.000180663	0.888789	0.0644539	FALSE	9.01e-08	0.888789	0.196651	-632.366
AAMDC	6.24e-06	0.000181575	-0.369798	0.363952	FALSE	1.39e-07	-0.369798	0.0818496	-1996.54
CRLF1	6.44e-06	0.00018686	0.974865	0.0563489	FALSE	1.02e-09	0.974865	0.216088	-479.524
ENAH	6.61e-06	0.000191238	-0.273809	0.698186	FALSE	6.95e-07	-0.273809	0.0607658	-2779.29
MRVI1	6.65e-06	0.000192153	0.883816	0.0582787	FALSE	6.56e-08	0.883816	0.19621	-551.791
SRP19	6.76e-06	0.000194673	-0.381103	0.305288	FALSE	1.67e-07	-0.381103	0.0846679	-1686.21
GALNT2	6.9e-06	0.000198258	-0.416138	0.264377	FALSE	5e-07	-0.416138	0.092542	-1533.84
FILIP1	7.26e-06	0.000208188	-0.345354	0.456195	FALSE	4.49e-08	-0.345354	0.0769879	-2319.35
LRRC32	7.29e-06	0.000208507	0.910028	0.055191	FALSE	1.02e-07	0.910028	0.202906	-545.406
DAB2	7.38e-06	0.000210578	-0.249441	0.849479	FALSE	6.24e-07	-0.249441	0.0556496	-3086.85
SARAF	7.72e-06	0.000219537	-0.241954	0.853338	FALSE	8.87e-07	-0.241954	0.0540929	-3015.34
GBE1	8.04e-06	0.000228285	-0.494982	0.172906	FALSE	4.24e-08	-0.494982	0.110882	-1176.6
USP18	8.07e-06	0.000228538	0.611314	0.157468	FALSE	2.95e-08	0.611314	0.136965	-1099.21
ERRFI1	8.11e-06	0.000229163	0.395164	0.491316	FALSE	8.64e-08	0.395164	0.0885582	-2365.5
RSPO3	8.59e-06	0.000241978	-0.626424	0.200309	FALSE	8.59e-09	-0.626424	0.140769	-1191.25
GNG11	8.65e-06	0.000243259	0.339428	0.46044	FALSE	1.06e-07	0.339428	0.0763042	-2157.43
PTPRD	8.7e-06	0.000244074	-0.53189	0.149749	FALSE	6.38e-08	-0.53189	0.119603	-1143.81
HACD3	8.76e-06	0.000245077	-0.334379	0.41181	FALSE	1.35e-07	-0.334379	0.0752136	-2082.81
PERP	8.93e-06	0.000249347	1.06674	0.0428406	FALSE	8.56e-08	1.06674	0.240176	-414.156
WFDC1	9.06e-06	0.000252294	0.666233	0.121961	FALSE	2.19e-07	0.666233	0.150104	-971.369
TRIM47	9.24e-06	0.000256761	-0.350253	0.386337	FALSE	3.04e-07	-0.350253	0.0789894	-1946.36
ZC3H12A	9.3e-06	0.000257799	-0.372491	0.343883	FALSE	5.23e-07	-0.372491	0.0840308	-1806.25
ABL1	9.38e-06	0.000259474	-0.472024	0.181783	FALSE	5.49e-07	-0.472024	0.10653	-1226.36
SLC39A4	9.71e-06	0.000267841	-0.690797	0.0957159	FALSE	4.52e-07	-0.690797	0.156164	-854.19
MAN1A1	1.01e-05	0.00027784	-0.374785	0.286762	FALSE	1.03e-07	-0.374785	0.0848871	-1686.27
CLIP1	1.03e-05	0.000282415	-0.336814	0.414898	FALSE	3.89e-07	-0.336814	0.0763567	-1975.19
HRH2	1.04e-05	0.000283914	1.9082	0.0177538	FALSE	4.35e-08	1.9082	0.432757	-226.331
CFLAR	1.05e-05	0.000285477	-0.348739	0.360865	FALSE	1.1e-07	-0.348739	0.0791294	-1879.9
ETV1	1.05e-05	0.000285477	-0.47212	0.200695	FALSE	1.74e-07	-0.47212	0.107115	-1344.96
PRELP	1.06e-05	0.000288008	-0.278963	0.762254	FALSE	1.9e-07	-0.278963	0.0633317	-3031.73
PRRX2	1.09e-05	0.000295737	1.1858	0.0335778	FALSE	3.28e-08	1.1858	0.269621	-361.037
SLN	1.09e-05	0.000295737	1.57596	0.0385951	FALSE	1.36e-08	1.57596	0.358302	-346.789
RBM15	1.12e-05	0.000301494	-0.915841	0.0459282	FALSE	4.61e-08	-0.915841	0.208461	-463.692
IL1R1	1.17e-05	0.000315678	-0.22525	1.14589	FALSE	3.29e-08	-0.22525	0.0513934	-3397.98
SLC25A3	1.18e-05	0.000315958	-0.174737	1.68738	FALSE	1.4e-07	-0.174737	0.0398746	-3943.21
PALMD	1.23e-05	0.000328624	-0.511574	0.177538	FALSE	1.98e-07	-0.511574	0.116982	-1196.81
NR2F2	1.29e-05	0.000344474	0.380452	0.369741	FALSE	3.34e-07	0.380452	0.0872138	-2028.39
WSB1	1.31e-05	0.000349687	-0.219286	1.16017	FALSE	7.29e-07	-0.219286	0.0503122	-3756.82
MAP3K2	1.34e-05	0.000357673	-0.453002	0.198765	FALSE	4.18e-08	-0.453002	0.104065	-1276.19
CYP39A1	1.39e-05	0.000368286	-1.24105	0.0266306	FALSE	1.16e-07	-1.24105	0.28555	-314.264
CYP3A5	1.39e-05	0.000369068	-0.828772	0.0613663	FALSE	3.14e-08	-0.828772	0.190733	-538.495
TFAM	1.45e-05	0.000384177	-0.467411	0.186415	FALSE	1.34e-07	-0.467411	0.107801	-1328.01
NKX3-1	1.47e-05	0.000387184	-1.03561	0.0401389	FALSE	8.03e-09	-1.03561	0.238968	-398.712
CCDC47	1.53e-05	0.000403273	-0.312691	0.433037	FALSE	2.24e-07	-0.312691	0.0723116	-2099.82
SUB1	1.55e-05	0.000405702	-0.177955	1.72906	FALSE	6.63e-07	-0.177955	0.0411753	-4263.57
IGF2	1.54e-05	0.000405702	2.41779	0.0185257	FALSE	1.49e-08	2.41779	0.559371	-184.441
TAF1D	1.57e-05	0.000409918	-0.272267	0.656117	FALSE	3.74e-07	-0.272267	0.0630376	-2660.25
IGHG1	1.59e-05	0.00041415	-1.25148	0.132767	FALSE	5.77e-09	-1.25148	0.289938	-602.784
HSP90AA1	1.62e-05	0.000422036	0.139287	8.08491	FALSE	8.32e-08	0.139287	0.0323045	-7216.29
ZEB1	1.66e-05	0.000430737	0.681627	0.101891	FALSE	1.66e-07	0.681627	0.158271	-796.95
RBM39	1.68e-05	0.000435488	-0.199972	1.30143	FALSE	8.52e-07	-0.199972	0.0464644	-3941.56
RRAD	1.68e-05	0.000435673	-0.573076	0.650714	FALSE	2.92e-09	-0.573076	0.133175	-1976.06
FSTL3	1.76e-05	0.000454	-0.298799	0.568506	FALSE	2.47e-07	-0.298799	0.0695923	-2520.38
YTHDF2	1.82e-05	0.000467989	-0.316268	0.412968	FALSE	6.39e-08	-0.316268	0.073785	-2002.08
CLDN11	1.83e-05	0.000470688	1.49588	0.0281745	FALSE	1.58e-08	1.49588	0.349131	-289.614
TSPAN11	1.84e-05	0.000471688	1.51357	0.023929	FALSE	2.32e-08	1.51357	0.35334	-258.836
IL6R	1.86e-05	0.000475181	-0.61082	0.101505	FALSE	4.1e-07	-0.61082	0.142665	-841.201
ASPH	1.88e-05	0.000479204	-0.372735	0.280973	FALSE	2.12e-07	-0.372735	0.0871054	-1585.75
FRMD4B	1.91e-05	0.000487611	-0.428329	0.241606	FALSE	2.21e-07	-0.428329	0.100199	-1636.68
ADAMTS9	1.92e-05	0.000487766	0.648691	0.146662	FALSE	1.55e-07	0.648691	0.151768	-990.146
HEYL	1.97e-05	0.000499029	1.21189	0.0304902	FALSE	2.98e-08	1.21189	0.283905	-349.403
GLIS3	2.04e-05	0.000517197	-0.431417	0.253956	FALSE	3.91e-08	-0.431417	0.101267	-1493.8
SIPA1L2	2.05e-05	0.000518201	-0.869658	0.0451563	FALSE	4.5e-08	-0.869658	0.204181	-444.687
FAM96B	2.06e-05	0.000520361	-0.233657	0.772675	FALSE	3.95e-07	-0.233657	0.0548767	-2940.04
SERF2	2.1e-05	0.000528341	0.116693	5.90699	FALSE	1.61e-07	0.116693	0.0274316	-6621.51
PRKCDBP	2.13e-05	0.000533668	0.222905	1.12196	FALSE	2.03e-07	0.222905	0.0524413	-3543.96
TNFRSF19	2.14e-05	0.000533668	-0.699196	0.0822076	FALSE	2.4e-07	-0.699196	0.164506	-732.956
GMFB	2.13e-05	0.000533668	-0.511089	0.14396	FALSE	7.3e-08	-0.511089	0.120247	-1113.57
RHOU	2.18e-05	0.000541985	-0.885954	0.0517175	FALSE	7.06e-09	-0.885954	0.208652	-502.413
CST2	2.18e-05	0.000541985	2.0353	0.0258587	FALSE	2.23e-09	2.0353	0.47936	-207.862
PAWR	2.27e-05	0.00056421	0.654233	0.0988036	FALSE	1.46e-07	0.654233	0.154433	-850.002
PENK	2.29e-05	0.000567135	1.35802	0.0837514	FALSE	1.45e-09	1.35802	0.320686	-471.552
C1orf21	2.3e-05	0.000569301	-0.377468	0.294095	FALSE	1.89e-07	-0.377468	0.0891642	-1752.69
MTSS1	2.44e-05	0.000603201	-0.926556	0.0447704	FALSE	7.98e-08	-0.926556	0.219568	-467.261
ALDH1A3	2.57e-05	0.00063202	0.467691	0.25743	FALSE	1.84e-09	0.467691	0.111122	-1464.94
CRISPLD2	2.57e-05	0.00063202	0.231239	1.40795	FALSE	5.53e-08	0.231239	0.0549467	-4172.69
COL14A1	2.58e-05	0.000632067	0.257015	0.870706	FALSE	4.04e-08	0.257015	0.0610787	-3118.96
TUBB4B	2.59e-05	0.000633722	-0.189231	1.72983	FALSE	6.95e-09	-0.189231	0.0449814	-4169.44
IFI27	2.67e-05	0.000652499	0.809417	0.0798919	FALSE	1.03e-07	0.809417	0.192728	-714.123
TMEM165	2.7e-05	0.00065842	-0.242084	0.739869	FALSE	7.51e-08	-0.242084	0.0576765	-2861.68
BTG3	2.71e-05	0.000660099	-0.240152	0.785025	FALSE	3.7e-07	-0.240152	0.0572306	-2840.87
VAPA	2.83e-05	0.00068702	-0.194117	1.31108	FALSE	3.21e-07	-0.194117	0.0463652	-3822.54
SNCG	2.85e-05	0.000689384	1.03082	0.0459282	FALSE	4.57e-08	1.03082	0.246287	-458.712
CCL8	2.92e-05	0.000705746	1.28063	0.0679274	FALSE	1.55e-09	1.28063	0.306398	-489.666
OLA1	2.93e-05	0.000707593	-0.480255	0.147433	FALSE	1.39e-07	-0.480255	0.114933	-997.692
BCOR	2.99e-05	0.000718882	-1.09169	0.031648	FALSE	3.63e-08	-1.09169	0.261515	-355.11
FAM20C	3.17e-05	0.000760264	-0.365106	0.295639	FALSE	9.29e-08	-0.365106	0.0877488	-1684.11
BCAM	3.17e-05	0.000760264	0.818752	0.0644539	FALSE	1.51e-07	0.818752	0.196758	-605.565
KIFC3	3.36e-05	0.000803331	-0.643303	0.0856812	FALSE	2.62e-07	-0.643303	0.155097	-734.713
SFRP1	3.41e-05	0.000813581	1.20178	0.0540332	FALSE	8.96e-09	1.20178	0.289979	-402.729
MBD4	3.46e-05	0.000824163	-0.430199	0.199151	FALSE	1.49e-07	-0.430199	0.103889	-1322.24
ITGBL1	3.52e-05	0.000837976	0.427729	0.372829	FALSE	2.34e-08	0.427729	0.1034	-1724.28
CCR1	3.54e-05	0.000840493	-1.01342	0.0405249	FALSE	9.51e-09	-1.01342	0.245055	-418.02
SRPX	3.55e-05	0.000840714	0.346028	0.376689	FALSE	2.13e-08	0.346028	0.0836832	-1847.12
PRDM1	3.56e-05	0.000841513	1.1014	0.0347356	FALSE	1.08e-07	1.1014	0.266405	-390.58
SLC16A3	3.59e-05	0.000846754	0.895029	0.0497877	FALSE	1.14e-07	0.895029	0.216588	-511.273
ARHGDIB	3.71e-05	0.000872269	0.40031	0.26785	FALSE	2.23e-08	0.40031	0.097042	-1611.71
MAL	3.75e-05	0.00088199	-0.580926	0.121575	FALSE	9.49e-08	-0.580926	0.140929	-1019.94
RGL1	3.77e-05	0.000884391	-0.778989	0.0578927	FALSE	9.29e-08	-0.778989	0.189028	-581.565
F13A1	3.8e-05	0.000889523	3.09338	0.0138942	FALSE	1.2e-08	3.09338	0.750962	-163.095
S100A4	3.82e-05	0.000892598	-0.178922	4.37669	FALSE	5.17e-08	-0.178922	0.0434491	-6621.38
DTNA	3.87e-05	0.000903062	-0.550086	0.119259	FALSE	2.18e-07	-0.550086	0.133684	-946.817
GABARAPL1	3.95e-05	0.00091799	-0.282504	0.491702	FALSE	9.58e-08	-0.282504	0.0687261	-2291.2
LNP1	3.96e-05	0.000919683	-0.710046	0.0710151	FALSE	6.91e-08	-0.710046	0.172773	-658.55
ENTPD1	4.01e-05	0.000929172	0.564752	0.121961	FALSE	1.13e-07	0.564752	0.137514	-982.125
C7	4.13e-05	0.000954417	-0.19352	4.44423	FALSE	2.47e-08	-0.19352	0.0471976	-6016.41
C4orf48	4.24e-05	0.000978513	0.423687	0.225782	FALSE	1.72e-07	0.423687	0.10349	-1501.05
AREG	4.27e-05	0.000984194	1.16173	0.122733	FALSE	1.97e-09	1.16173	0.283889	-535.389
FASTKD2	4.31e-05	0.000990406	-0.628275	0.0825936	FALSE	4.61e-08	-0.628275	0.153602	-722.752
RLIM	4.33e-05	0.000992537	-0.671585	0.0725589	FALSE	2.75e-07	-0.671585	0.164229	-659.833
SULF1	4.41e-05	0.00100967	0.761009	0.0806638	FALSE	2.45e-08	0.761009	0.186298	-636.871
GPSM3	4.44e-05	0.0010136	1.23797	0.0285604	FALSE	8.94e-09	1.23797	0.303162	-325.734
NUAK1	4.48e-05	0.00102074	-1.19236	0.0274025	FALSE	7e-08	-1.19236	0.292142	-311.331
TMBIM1	4.56e-05	0.00103402	-0.337855	0.320726	FALSE	6.36e-07	-0.337855	0.0828666	-1765.14
MFGE8	4.55e-05	0.00103402	0.246219	0.752605	FALSE	1.11e-06	0.246219	0.0603798	-3044.43
PTPRM	4.56e-05	0.00103402	-0.986599	0.0378232	FALSE	7.5e-08	-0.986599	0.241981	-395.846
CDKN1A	4.58e-05	0.00103741	0.228648	1.07102	FALSE	3.26e-07	0.228648	0.0560977	-3624.78
S1PR2	4.64e-05	0.00104795	-0.364826	0.28406	FALSE	1.3e-07	-0.364826	0.0895701	-1699.81
PLAC9	4.66e-05	0.00104986	-0.164634	3.18526	FALSE	3.11e-07	-0.164634	0.0404287	-5926.63
SRSF5	4.68e-05	0.00105349	-0.204938	1.12003	FALSE	7.95e-07	-0.204938	0.0503414	-3582.68
PLOD2	4.75e-05	0.00106422	-0.360117	0.33655	FALSE	2.4e-08	-0.360117	0.0885308	-1756.82
SGMS2	4.74e-05	0.00106422	-0.72877	0.063682	FALSE	2.67e-07	-0.72877	0.179149	-590.777
ARID5B	4.77e-05	0.00106699	-0.155354	2.96526	FALSE	1.13e-07	-0.155354	0.0382019	-5467.88
COL5A1	4.87e-05	0.0010866	0.310058	0.41181	FALSE	2.38e-08	0.310058	0.0763322	-2017.63
OSBPL8	4.88e-05	0.00108818	-0.263296	0.576225	FALSE	2.83e-07	-0.263296	0.0648324	-2377.92
SESN3	4.9e-05	0.00108959	-0.512347	0.137399	FALSE	1.94e-07	-0.512347	0.12618	-1034.03
CFHR1	4.92e-05	0.0010899	2.13898	0.0331918	FALSE	1.14e-08	2.13898	0.52691	-224.588
LY96	4.92e-05	0.0010899	0.686244	0.0783481	FALSE	3.74e-07	0.686244	0.169046	-724.43
TLE2	4.99e-05	0.00110357	-0.598406	0.0934002	FALSE	1.62e-07	-0.598406	0.147531	-807.346
H2AFJ	5e-05	0.00110452	-0.212895	0.99614	FALSE	1.34e-06	-0.212895	0.0524957	-3335.26
SERPINI1	5.04e-05	0.00110952	1.27552	0.0301042	FALSE	6.43e-09	1.27552	0.314632	-308.986
MAGEF1	5.11e-05	0.00112496	-0.473457	0.155152	FALSE	1.2e-07	-0.473457	0.116894	-1113.43
ATP6V1B2	5.31e-05	0.00116613	-0.358312	0.281359	FALSE	2.61e-07	-0.358312	0.088659	-1644.26
PDGFRA	5.32e-05	0.00116627	-0.348275	0.335392	FALSE	7.1e-08	-0.348275	0.0861855	-1942.09
PNRC1	5.58e-05	0.0012204	-0.15658	2.93246	FALSE	6.47e-07	-0.15658	0.0388545	-5213.65
LAMP5	5.76e-05	0.00125636	1.83166	0.0173678	FALSE	6.01e-09	1.83166	0.455339	-194.385
TSPAN5	5.8e-05	0.00126112	0.818435	0.0590506	FALSE	5.04e-08	0.818435	0.203547	-537.103
B4GALT5	5.79e-05	0.00126112	-0.466519	0.154766	FALSE	1.4e-07	-0.466519	0.116016	-1127.27
SERPINB9	5.99e-05	0.00129697	-0.510441	0.156696	FALSE	1.85e-08	-0.510441	0.127185	-1155.52
DDX5	5.98e-05	0.00129697	-0.126629	4.58819	FALSE	9.84e-08	-0.126629	0.0315509	-6062.4
CD74	6.12e-05	0.00132294	0.423206	0.52142	FALSE	1.44e-07	0.423206	0.105583	-2167.47
TTC7A	6.35e-05	0.00136887	-0.957058	0.0285604	FALSE	0.0544132	-0.957058	0.239303	-122.261
CYP27A1	6.36e-05	0.00136887	-0.408169	0.209186	FALSE	1.64e-07	-0.408169	0.10207	-1384.22
TOP1	6.35e-05	0.00136887	-0.238169	0.734851	FALSE	4.99e-07	-0.238169	0.0595536	-2794.73
KCNS3	6.52e-05	0.00139933	-0.668025	0.0748746	FALSE	4.71e-08	-0.668025	0.167288	-693.036
TCEAL7	6.55e-05	0.00140311	0.524498	0.136627	FALSE	3.51e-08	0.524498	0.131382	-1027.88
MILR1	6.68e-05	0.00142958	-0.773488	0.0586646	FALSE	2.59e-08	-0.773488	0.193988	-581.875
DNPEP	6.76e-05	0.00144269	-0.308656	0.360479	FALSE	5.71e-07	-0.308656	0.0774602	-1934.38
CHIC2	7.03e-05	0.00149757	-0.289881	0.467001	FALSE	1.26e-07	-0.289881	0.0729188	-2345.01
PSME3	7.08e-05	0.0015053	-0.531999	0.103821	FALSE	5.32e-08	-0.531999	0.133878	-797.444
CELF2	7.18e-05	0.00152386	-0.265845	0.551139	FALSE	5.11e-07	-0.265845	0.0669568	-2423.07
IGF1R	7.21e-05	0.00152936	-0.628874	0.0752605	FALSE	4.09e-08	-0.628874	0.158442	-653.301
TTF1	7.36e-05	0.00155684	-0.712583	0.0663836	FALSE	6.14e-08	-0.712583	0.179744	-625.673
MRC2	7.67e-05	0.00161929	-0.274172	0.519105	FALSE	4.35e-07	-0.274172	0.0693298	-2491.44
MRPL15	7.7e-05	0.00162233	-0.386218	0.205712	FALSE	2.08e-07	-0.386218	0.0976868	-1351.24
DIO3OS	7.71e-05	0.00162233	-0.598343	0.104593	FALSE	2.95e-07	-0.598343	0.151353	-956.004
SERPINH1	7.73e-05	0.001625	0.18444	1.81166	FALSE	1.38e-08	0.18444	0.0466645	-3880.41
DLC1	7.76e-05	0.00162674	-0.301522	0.41567	FALSE	2.53e-07	-0.301522	0.0763001	-2007.24
LY6E	7.86e-05	0.00164471	0.194047	1.3076	FALSE	1.96e-07	0.194047	0.0491417	-3921.09
RPS6KA3	7.88e-05	0.00164581	-0.442744	0.161714	FALSE	6.89e-08	-0.442744	0.11214	-1163.72
RGS3	7.89e-05	0.00164612	-0.313122	0.459282	FALSE	3.6e-07	-0.313122	0.0793181	-2367.16
NES	7.93e-05	0.00165114	0.930973	0.0447704	FALSE	1.87e-08	0.930973	0.235897	-434.845
C1QTNF3	7.95e-05	0.00165165	1.56585	0.0243149	FALSE	3.8e-08	1.56585	0.396817	-244.157
CRIP1	8.06e-05	0.00167292	0.329641	0.549595	FALSE	4.09e-08	0.329641	0.0836116	-2566.77
ST8SIA1	8.14e-05	0.00168656	-0.657115	0.0825936	FALSE	6.49e-08	-0.657115	0.166774	-722.407
CDO1	8.26e-05	0.00170703	-0.642398	0.0833655	FALSE	3.48e-07	-0.642398	0.163183	-768.765
SERINC3	8.27e-05	0.00170703	-0.303127	0.357391	FALSE	5.56e-07	-0.303127	0.077006	-1894.24
INSR	8.4e-05	0.00173046	-0.627816	0.0868391	FALSE	2.24e-07	-0.627816	0.159639	-768.696
LIMD1	8.49e-05	0.00174525	-0.995112	0.0370513	FALSE	3.5e-08	-0.995112	0.253193	-383.88
KREMEN1	8.63e-05	0.00177129	-0.493189	0.127364	FALSE	2.13e-07	-0.493189	0.125613	-941.875
BZW1	8.67e-05	0.00177672	-0.214814	0.916635	FALSE	1.12e-06	-0.214814	0.0547282	-3229.12
TMOD1	8.7e-05	0.00178014	0.836412	0.0540332	FALSE	1.99e-08	0.836412	0.213141	-540.772
SORBS1	8.76e-05	0.00178873	1.17278	0.0266306	FALSE	5.72e-08	1.17278	0.298977	-310.646
SEC63	8.8e-05	0.00179009	-0.238146	0.617136	FALSE	6.64e-08	-0.238146	0.0607263	-2482.28
MIR222HG	8.79e-05	0.00179009	-0.55943	0.11347	FALSE	7.14e-08	-0.55943	0.142649	-913.734
TMED5	8.83e-05	0.00179307	-0.366989	0.255114	FALSE	2.2e-08	-0.366989	0.0936004	-1477.16
TSPAN2	8.87e-05	0.00179819	1.2793	0.0247009	FALSE	7.9e-08	1.2793	0.326377	-264.672
USP13	9.04e-05	0.00183041	-1.19428	0.023929	FALSE	1.28e-08	-1.19428	0.305051	-280.78
WTAP	9.16e-05	0.00185219	-0.248179	0.840216	FALSE	1.82e-08	-0.248179	0.0634448	-3056.99
SMYD3	9.27e-05	0.00187108	-0.461587	0.226939	FALSE	1.36e-08	-0.461587	0.118087	-1298.52
PTCD3	9.39e-05	0.00189076	-0.56101	0.0999614	FALSE	2.28e-07	-0.56101	0.143631	-825.264
GLUD1	9.44e-05	0.00189857	-0.300382	0.439985	FALSE	3.03e-07	-0.300382	0.0769322	-2141.54
ATF3	9.6e-05	0.00192698	0.203476	2.00733	FALSE	3.54e-07	0.203476	0.0521667	-4758.4
AQP3	9.7e-05	0.00194332	-0.412184	0.233887	FALSE	4.94e-07	-0.412184	0.105742	-1504.48
SNX10	9.75e-05	0.00195093	-0.682925	0.0852953	FALSE	3.19e-08	-0.682925	0.175258	-655.713
LRRFIP2	9.77e-05	0.00195097	-0.334428	0.295253	FALSE	1.62e-07	-0.334428	0.0858332	-1669.4
LRRC16A	9.89e-05	0.00197185	-0.681969	0.0675415	FALSE	1.68e-07	-0.681969	0.175166	-664.485
LDHA	0.000102394	0.00203797	-0.133034	3.7252	FALSE	5.01e-07	-0.133034	0.0342443	-5593.52
PLXDC2	0.000103866	0.00206377	-0.247344	0.614435	FALSE	3.29e-07	-0.247344	0.0637259	-2493.55
FAM180A	0.00010577	0.00209804	0.799671	0.0621382	FALSE	1.69e-07	0.799671	0.206263	-574.964
SPEN	0.000106966	0.00211468	-0.5161	0.115399	FALSE	6.87e-08	-0.5161	0.133214	-870.64
NEXN	0.00010697	0.00211468	-0.294007	0.512157	FALSE	5.4e-07	-0.294007	0.0758881	-2559.22
BOK	0.00010887	0.00214863	-0.622407	0.0764184	FALSE	6.39e-08	-0.622407	0.160832	-678.632
CDC42	0.000110007	0.00216742	-0.199479	1.02856	FALSE	5.24e-07	-0.199479	0.0515798	-3356.64
SEC62	0.000110267	0.0021689	-0.145443	2.40679	FALSE	6.31e-07	-0.145443	0.0376131	-5173.82
SLC43A3	0.000111357	0.00218666	-0.384408	0.232343	FALSE	2.52e-07	-0.384408	0.0994739	-1378.22
CSTA	0.000115869	0.00227145	-0.314503	0.385179	FALSE	4.98e-07	-0.314503	0.0815895	-1993.56
EGR2	0.00011629	0.00227591	0.526258	0.149363	FALSE	1.22e-08	0.526258	0.136555	-1017.56
CUX1	0.000116632	0.0022788	-0.381026	0.209572	FALSE	5.8e-07	-0.381026	0.0988882	-1340.02
NT5DC1	0.000118295	0.00230744	-0.601386	0.0845233	FALSE	1.36e-07	-0.601386	0.156219	-723.787
FYN	0.000119742	0.00233118	-0.461402	0.14396	FALSE	3.31e-07	-0.461402	0.119949	-1064.38
WBSCR17	0.00011991	0.00233118	-0.825782	0.0432266	FALSE	1.37e-07	-0.825782	0.214695	-445.233
ATP1A1	0.000121047	0.00234939	-0.212851	0.842918	FALSE	5.8e-08	-0.212851	0.0553723	-3016.12
TOR1AIP2	0.00012255	0.00237071	-0.421872	0.169433	FALSE	2.36e-07	-0.421872	0.109835	-1142.52
HRC	0.000122492	0.00237071	1.41146	0.0196835	FALSE	9.68e-08	1.41146	0.367463	-244.776
ARL4D	0.00012301	0.00237569	-0.338979	0.39367	FALSE	1.58e-07	-0.338979	0.0882746	-2147.2
P4HA3	0.000125119	0.00241245	0.570204	0.106137	FALSE	7.36e-10	0.570204	0.14865	-729.058
SERPINA5	0.000127073	0.00244611	-1.90762	0.0119645	FALSE	7.21e-08	-1.90762	0.497804	-165.288
INSIG1	0.000128131	0.00246243	0.600832	0.10961	FALSE	6.54e-08	0.600832	0.156874	-803.519
GLDN	0.000128687	0.00246907	-0.96574	0.0347356	FALSE	2.35e-08	-0.96574	0.25222	-364.127
TJP2	0.000134207	0.00256657	-0.483293	0.143188	FALSE	1.17e-07	-0.483293	0.126563	-1084.44
FOXF1	0.000134149	0.00256657	0.68865	0.0683134	FALSE	1.47e-07	0.68865	0.180336	-632.363
LSS	0.000134829	0.00257427	-0.821908	0.0451563	FALSE	1.81e-07	-0.821908	0.215302	-460
PLK3	0.000139538	0.00265984	-0.248473	0.692011	FALSE	5.85e-09	-0.248473	0.0652334	-2624.82
VCAM1	0.000139767	0.00265989	0.55195	0.154381	FALSE	2.66e-08	0.55195	0.144923	-1059.24
APBB1IP	0.000140861	0.00267636	-0.879666	0.0382092	FALSE	6.65e-08	-0.879666	0.231087	-403.081
ID1	0.000142966	0.00271195	0.409827	0.244693	FALSE	9.8e-08	0.409827	0.107765	-1562
MAOA	0.000147416	0.00279186	-0.577328	0.0941721	FALSE	3.92e-07	-0.577328	0.152113	-809.352
PIM3	0.000150297	0.00284182	-0.276463	0.489386	FALSE	1.99e-07	-0.276463	0.0729343	-2243.81
EIF1AX	0.000151865	0.00286684	-0.192662	1.10382	FALSE	3.59e-07	-0.192662	0.0508612	-3432.83
SORBS2	0.000152388	0.0028712	1.28605	0.023929	FALSE	1.15e-08	1.28605	0.339582	-286.492
TWISTNB	0.000152585	0.0028712	-0.333146	0.296025	FALSE	1.18e-07	-0.333146	0.0879751	-1706.78
COX5A	0.000153203	0.0028782	-0.238821	0.542648	FALSE	4.74e-07	-0.238821	0.0630831	-2329.5
KIAA0753	0.000153883	0.00288636	-1.69076	0.0115785	FALSE	0.0108785	-1.69076	0.446733	-5.86452
PHLDA2	0.000155136	0.00290521	0.329547	0.534157	FALSE	2.01e-08	0.329547	0.0871195	-2274.43
MT1X	0.000156706	0.00292993	-0.257907	6.71285	FALSE	4.67e-08	-0.257907	0.068226	-7387.62
PCDH15	0.000158867	0.00296561	-1.38427	0.0200695	FALSE	1.44e-08	-1.38427	0.36652	-256.457
YWHAE	0.000160584	0.00299289	-0.175392	1.24276	FALSE	1.24e-06	-0.175392	0.0464725	-3708.47
ITM2C	0.000161716	0.00300648	0.327566	0.298726	FALSE	1.15e-07	0.327566	0.0868335	-1716.19
PWWP2B	0.000161826	0.00300648	-1.0657	0.0250868	FALSE	5.22e-08	-1.0657	0.282515	-283.147
ANTXR2	0.000164284	0.00304732	-0.43382	0.165187	FALSE	1.81e-07	-0.43382	0.11512	-1202.36
LAMB3	0.000165687	0.00306848	-1.24397	0.0115785	FALSE	0.041796	-1.24397	0.330291	0
CCP110	0.000168074	0.00310778	-0.797275	0.0424547	FALSE	1.16e-07	-0.797275	0.211888	-431.513
PCYOX1	0.000168502	0.00311079	-0.415613	0.170976	FALSE	9.44e-08	-0.415613	0.110474	-1237.55
SHE	0.000169975	0.00313305	-2.0437	0.0100347	FALSE	0.00653341	-2.0437	0.543551	-2.49058
RNF4	0.000170659	0.00314071	-0.607545	0.0741027	FALSE	1.62e-07	-0.607545	0.161628	-652.333
PDCD4	0.000173574	0.00318935	-0.367663	0.229641	FALSE	7.29e-07	-0.367663	0.0979217	-1533.79
NOP16	0.000176548	0.00323893	-0.295387	0.413354	FALSE	7.36e-07	-0.295387	0.0787614	-2093.87
MALSU1	0.000179895	0.00329003	-0.334738	0.252798	FALSE	9.73e-07	-0.334738	0.0893661	-1551.38
FAT3	0.00017964	0.00329003	-0.888328	0.0412968	FALSE	3.77e-08	-0.888328	0.237137	-455.144
TRPC4	0.00018125	0.00330965	-0.816707	0.0509456	FALSE	4.24e-08	-0.816707	0.218149	-510.354
CNTN4	0.000182076	0.0033144	1.73508	0.0142802	FALSE	2.5e-08	1.73508	0.463594	-191.221
SERPINA3	0.000181836	0.0033144	-1.0819	0.0274025	FALSE	2.91e-08	-1.0819	0.289045	-299.429
SPA17	0.00018511	0.0033644	-0.905843	0.0304902	FALSE	7.6e-08	-0.905843	0.2423	-332.721
FOXC1	0.000185761	0.00337101	1.16659	0.0304902	FALSE	3.36e-09	1.16659	0.312119	-302.102
GRN	0.000186074	0.00337148	0.231264	0.638364	FALSE	1.24e-06	0.231264	0.0618815	-2633.02
UTP3	0.000190134	0.00343972	-0.398669	0.195291	FALSE	3.79e-08	-0.398669	0.106831	-1265.51
CNN2	0.000191101	0.00345189	-0.257448	0.521806	FALSE	4.82e-08	-0.257448	0.0690116	-2436.03
MIR22HG	0.000192163	0.00346573	-0.296065	0.388267	FALSE	1.11e-07	-0.296065	0.079393	-2092.04
AKAP13	0.00019324	0.00347981	-0.208424	0.79506	FALSE	9.63e-07	-0.208424	0.0559123	-2905.16
NTPCR	0.000193836	0.00348518	-0.383866	0.193362	FALSE	9.44e-08	-0.383866	0.102998	-1313.2
SLC12A8	0.000197786	0.00355076	1.24665	0.0243149	FALSE	1.36e-08	1.24665	0.334957	-247.317
SPCS2	0.000202405	0.00362813	-0.159905	1.40834	FALSE	1.77e-06	-0.159905	0.0430316	-3871.52
AC058791.1	0.000204847	0.00366629	-0.781197	0.0436125	FALSE	3.87e-08	-0.781197	0.210397	-433.883
CDKAL1	0.000207767	0.00370723	-0.985822	0.0281745	FALSE	6.9e-08	-0.985822	0.265765	-330.633
PRDX2	0.00020752	0.00370723	-0.166191	1.34504	FALSE	6.13e-07	-0.166191	0.0447993	-3788.58
GULP1	0.000209934	0.00373454	-0.40649	0.191046	FALSE	6.97e-08	-0.40649	0.109662	-1330.51
PISD	0.000209822	0.00373454	-0.577578	0.0825936	FALSE	3.68e-07	-0.577578	0.155812	-751.049
KHDRBS1	0.000215181	0.00382207	-0.23432	0.556542	FALSE	1.23e-07	-0.23432	0.0633212	-2342.7
NAV3	0.000221687	0.00392688	-0.787572	0.0501737	FALSE	2.13e-08	-0.787572	0.213265	-502.275
HCFC1R1	0.000221752	0.00392688	0.297413	0.394442	FALSE	3.25e-08	0.297413	0.0805375	-2117.7
EDEM1	0.000226323	0.00400179	-0.872179	0.0324199	FALSE	8.88e-08	-0.872179	0.236513	-355.073
DOCK4	0.000226936	0.00400659	-0.520499	0.109224	FALSE	1.41e-07	-0.520499	0.141172	-895.211
GRIA1	0.000228209	0.00402301	-1.54857	0.0154381	FALSE	8.54e-08	-1.54857	0.420174	-210.465
PKN2	0.000228847	0.00402798	-0.420673	0.171748	FALSE	2.43e-07	-0.420673	0.114163	-1270.35
FRY	0.000229179	0.00402798	1.43162	0.0177538	FALSE	2.48e-08	1.43162	0.388554	-227.535
EIF4A1	0.000230318	0.00404194	-0.144224	2.49286	FALSE	3.27e-08	-0.144224	0.0391573	-4972.76
TGS1	0.000233457	0.0040909	-0.443202	0.147433	FALSE	2.82e-07	-0.443202	0.120443	-1121.73
FABP5	0.000237048	0.00414763	0.642603	0.0945581	FALSE	1.76e-08	0.642603	0.174817	-754.799
DECR1	0.000238466	0.00415385	-0.264604	0.421073	FALSE	5.43e-07	-0.264604	0.0720141	-2068.78
NARS2	0.000238162	0.00415385	-1.01036	0.0258587	FALSE	3.82e-08	-1.01036	0.274954	-305.258
LIMA1	0.000238136	0.00415385	-0.175056	1.30876	FALSE	1.59e-07	-0.175056	0.0476382	-3674.09
KB-1732A1.1	0.00024394	0.0042429	-0.990086	0.0231571	FALSE	0.000707754	-0.990086	0.269886	0
SDC2	0.000245687	0.00426695	0.278479	0.440756	FALSE	9.23e-07	0.278479	0.0759479	-2210.37
LIN7A	0.000247085	0.00428489	1.04744	0.0285604	FALSE	1.19e-07	1.04744	0.285776	-329.612
PRR5L	0.000249867	0.00432672	-0.695304	0.0602084	FALSE	6.82e-08	-0.695304	0.18985	-569.09
SPSB1	0.000251667	0.00435146	-0.250439	0.597839	FALSE	2.73e-07	-0.250439	0.0684154	-2593.68
AMD1	0.000252725	0.00436333	-0.23329	0.677345	FALSE	4.36e-07	-0.23329	0.0637495	-2792.44
ITGB5	0.000254592	0.00438909	-0.366537	0.213045	FALSE	2.05e-07	-0.366537	0.100213	-1372.92
IL15RA	0.000256017	0.00440717	-0.406453	0.167503	FALSE	5.05e-07	-0.406453	0.111169	-1202.26
GPX1	0.000256554	0.00440994	-0.149802	1.75261	FALSE	1.19e-07	-0.149802	0.0409784	-4133.02
VDAC2	0.000260051	0.00446352	-0.189646	0.884601	FALSE	7.61e-08	-0.189646	0.0519273	-2977.06
EPHA3	0.000262136	0.00449271	0.77394	0.0486299	FALSE	1.33e-07	0.77394	0.212032	-476.339
TOX4	0.000264283	0.0045229	-0.331718	0.247395	FALSE	1.57e-07	-0.331718	0.0909312	-1566.74
HSPH1	0.000267972	0.00457935	0.231795	0.77885	FALSE	1.08e-08	0.231795	0.0636022	-2844.81
TF	0.000273839	0.00467279	-2.79387	0.0142802	FALSE	5.03e-09	-2.79387	0.767785	-137.829
USP33	0.000275648	0.00469684	-0.492038	0.101891	FALSE	3.46e-07	-0.492038	0.13528	-824.997
TOX2	0.000280249	0.0047683	-0.677477	0.0621382	FALSE	2.03e-07	-0.677477	0.186484	-592.944
ABCA6	0.000283976	0.0048247	-0.44024	0.150907	FALSE	2.13e-07	-0.44024	0.121295	-1164.79
PRKAG2-AS1	0.000286327	0.00485761	-0.716731	0.0598225	FALSE	1.49e-07	-0.716731	0.19759	-571.36
TFPI	0.000288938	0.00489185	-0.150766	1.82555	FALSE	1.55e-07	-0.150766	0.0415904	-4467.78
CTSL	0.00028918	0.00489185	-0.187784	1.39869	FALSE	5.8e-09	-0.187784	0.0518052	-3844.99
LRRC59	0.00029096	0.00491487	-0.266902	0.42609	FALSE	5.56e-08	-0.266902	0.0736642	-2011.47
EFHD1	0.000291618	0.0049189	0.971738	0.0328059	FALSE	8.77e-08	0.971738	0.268241	-372.135
GPRC5C	0.000293832	0.00494203	-0.699013	0.0548051	FALSE	1.53e-07	-0.699013	0.193061	-526.292
COL6A2	0.000293649	0.00494203	0.11576	4.36279	FALSE	2.96e-07	0.11576	0.0319706	-5871.39
SPTBN1	0.000294516	0.00494644	-0.196906	0.883057	FALSE	6.18e-08	-0.196906	0.0543927	-3112.32
LARP1	0.000298406	0.005	-0.416762	0.144732	FALSE	3.54e-07	-0.416762	0.115233	-1012.57
RUNX1	0.000298559	0.005	-0.226723	0.615978	FALSE	1.28e-07	-0.226723	0.0626904	-2584.72
SMYD4	0.00030141	0.00504056	-0.687955	0.0602084	FALSE	5.51e-08	-0.687955	0.190354	-599.954
ITGA7	0.000304361	0.00508266	0.82111	0.0451563	FALSE	6.06e-08	0.82111	0.227356	-491.383
EDNRB	0.000306909	0.00511792	-0.361872	0.313007	FALSE	3.25e-08	-0.361872	0.100258	-1618.18
TARID	0.00030868	0.00512557	-0.888591	0.0362794	FALSE	2.58e-08	-0.888591	0.24629	-405.532
PLXNA4	0.000308423	0.00512557	-0.818814	0.0455423	FALSE	8.11e-09	-0.818814	0.226936	-451.708
NOTCH1	0.000308644	0.00512557	-1.07466	0.0243149	FALSE	2.3e-08	-1.07466	0.297859	-288.262
NUFIP2	0.000310322	0.00514555	-0.361909	0.218448	FALSE	3.47e-07	-0.361909	0.100348	-1444.44
ARHGEF10	0.000313232	0.00518647	-0.499912	0.107294	FALSE	3.93e-07	-0.499912	0.138706	-895.398
CCDC66	0.000313892	0.00519007	-0.505884	0.102663	FALSE	2.03e-07	-0.505884	0.140385	-879.993
EOGT	0.000317303	0.00523908	-0.459388	0.125434	FALSE	5.56e-08	-0.459388	0.127581	-996.115
TUBB6	0.000321371	0.00529878	-0.182644	1.07217	FALSE	1.2e-07	-0.182644	0.0507706	-3401.27
FER	0.000327196	0.00538725	-0.694001	0.0501737	FALSE	6.03e-08	-0.694001	0.193167	-484.044
PRNP	0.00032774	0.00538863	-0.221684	0.657275	FALSE	9.94e-08	-0.221684	0.0617104	-2740.78
BHLHE40	0.000332161	0.00545367	-0.314409	0.340409	FALSE	5.31e-07	-0.314409	0.0876077	-1885.17
AZI2	0.000334864	0.00549037	-0.290825	0.362022	FALSE	5.44e-08	-0.290825	0.081084	-1930.75
HTATSF1	0.000337318	0.00552288	-0.430884	0.137399	FALSE	6.86e-08	-0.430884	0.120197	-1023.56
KIF26A	0.000338062	0.00552734	-1.8857	0.0111926	FALSE	1.67e-08	-1.8857	0.52611	-141.778
PAPSS2	0.0003481	0.00568353	-0.419904	0.152837	FALSE	2.41e-07	-0.419904	0.117403	-1040.28
CREM	0.000350272	0.00571105	0.263596	0.575068	FALSE	1.25e-07	0.263596	0.0737338	-2552.93
NFKBIA	0.000351056	0.00571588	-0.148833	7.24276	FALSE	1.74e-08	-0.148833	0.0416388	-7105.32
CHEK2	0.000354654	0.00576263	-0.542949	0.0964878	FALSE	1.71e-07	-0.542949	0.152014	-848.304
NCAM2	0.000354911	0.00576263	-0.593399	0.0729448	FALSE	9.67e-08	-0.593399	0.166147	-677.619
ADGRL1	0.000356087	0.00577374	-0.794586	0.0366654	FALSE	1.12e-07	-0.794586	0.222532	-398.649
HNRNPA0	0.000357377	0.00578664	-0.155412	1.63952	FALSE	7.76e-08	-0.155412	0.0435362	-4113.2
FUZ	0.000358313	0.0057938	-0.674688	0.055191	FALSE	1.01e-07	-0.674688	0.18904	-568.088
E2F3	0.000361158	0.00581573	-0.770851	0.0443844	FALSE	1.19e-07	-0.770851	0.216109	-458.39
PTEN	0.000360594	0.00581573	0.444415	0.133925	FALSE	6.09e-07	0.444415	0.124578	-1003.92
IL10RB	0.000360746	0.00581573	-0.453856	0.130066	FALSE	6.43e-08	-0.453856	0.127228	-1037.78
SP1	0.000363916	0.00585211	-0.695488	0.0517175	FALSE	7.04e-08	-0.695488	0.19509	-538.226
KCNK5	0.000368268	0.00591398	-2.64153	0.00849093	FALSE	0.0131294	-2.64153	0.74162	0
SNED1	0.000369089	0.00591906	-0.407087	0.159784	FALSE	4.16e-07	-0.407087	0.11431	-1165.24
PIEZO2	0.000372154	0.00596005	-0.333553	0.268622	FALSE	6.7e-08	-0.333553	0.0937188	-1520.25
SBDS	0.000373713	0.00597686	-0.185079	0.978001	FALSE	7.88e-07	-0.185079	0.0520179	-3326.41
PANX1	0.000378971	0.00605269	-0.459614	0.137399	FALSE	6.01e-08	-0.459614	0.129312	-977.129
FAM133B	0.000380817	0.00606564	-0.207056	0.788885	FALSE	1.45e-06	-0.207056	0.0582758	-3093.76
ZFP36L1	0.000380781	0.00606564	-0.134395	3.5824	FALSE	2.08e-07	-0.134395	0.0378252	-5707.16
UAP1	0.000381898	0.00606638	-0.229196	0.820919	FALSE	2.5e-07	-0.229196	0.0645208	-2929.8
DNMBP	0.000381441	0.00606638	-0.586302	0.071401	FALSE	2.4e-07	-0.586302	0.165034	-631.958
LTBP2	0.000384517	0.00609973	-0.20799	0.890004	FALSE	4.03e-07	-0.20799	0.0585807	-3277.14
ETS1	0.000387274	0.00613515	-0.437291	0.143574	FALSE	5.03e-07	-0.437291	0.123229	-1088.28
TSPAN9	0.000387886	0.00613656	-0.380811	0.183327	FALSE	6.5e-07	-0.380811	0.107325	-1291.47
TMEM185B	0.00039136	0.00617435	-0.566407	0.0733308	FALSE	4.22e-08	-0.566407	0.159738	-640.015
LSAMP	0.000391855	0.00617435	-0.254667	0.47472	FALSE	4.77e-08	-0.254667	0.071828	-2267.71
LINC01290	0.000391351	0.00617435	-1.77163	0.0111926	FALSE	9.62e-08	-1.77163	0.499636	-159.783
ST6GALNAC5	0.000395789	0.00621963	-0.816083	0.039753	FALSE	8.39e-09	-0.816083	0.230345	-389.664
ZRANB1	0.000395647	0.00621963	-0.551007	0.0798919	FALSE	2.77e-07	-0.551007	0.155521	-708.795
UTRN	0.000400543	0.0062859	-0.443845	0.12775	FALSE	1.91e-07	-0.443845	0.12539	-993.521
ADAMTS1	0.000401911	0.00629894	0.317369	0.421845	FALSE	1.33e-07	0.317369	0.089682	-2125.28
AP1S2	0.00040333	0.00631273	0.66842	0.0617522	FALSE	6.75e-08	0.66842	0.188932	-624.721
PALM2	0.000404404	0.0063211	-0.585144	0.0802779	FALSE	2.6e-07	-0.585144	0.165426	-738.313
SMC3	0.000406265	0.00634174	-0.384001	0.174836	FALSE	1.22e-07	-0.384001	0.108598	-1201.33
RWDD2A	0.000408438	0.00634188	-1.02986	0.0231571	FALSE	5.05e-09	-1.02986	0.291367	-256.464
FGL2	0.000408015	0.00634188	1.15477	0.0219992	FALSE	1.06e-07	1.15477	0.326682	-270.024
TXLNG	0.000407377	0.00634188	-0.393562	0.173678	FALSE	6.6e-08	-0.393562	0.111325	-1173.72
GNA11	0.000407917	0.00634188	-0.572609	0.0710151	FALSE	2.66e-07	-0.572609	0.161987	-644.631
IFT22	0.000412882	0.0064024	-0.467634	0.113856	FALSE	6.72e-08	-0.467634	0.13241	-916.255
RELB	0.000413797	0.00640811	-0.384145	0.180239	FALSE	1.41e-08	-0.384145	0.108788	-1193.84
SLC20A2	0.000414827	0.00641559	-0.657604	0.0544191	FALSE	4.87e-08	-0.657604	0.186266	-521.043
VGLL4	0.000416574	0.00642503	-0.293525	0.343883	FALSE	1.08e-07	-0.293525	0.0831669	-1913.5
TSPAN12	0.000417081	0.00642503	1.84429	0.0115785	FALSE	8.42e-08	1.84429	0.522604	-160.908
FOLR1	0.000416892	0.00642503	-0.944123	0.0328059	FALSE	1.01e-07	-0.944123	0.267521	-373.511
TPM2	0.000419007	0.00644229	0.135758	2.7746	FALSE	6.63e-07	0.135758	0.0384821	-5133.92
DOT1L	0.000419301	0.00644229	-0.698202	0.0544191	FALSE	4.47e-08	-0.698202	0.197924	-529.691
HMGA1	0.000422898	0.00648905	-0.391814	0.379776	FALSE	1.28e-07	-0.391814	0.111141	-1808.43
CREB3L1	0.00042351	0.00648994	0.612982	0.0760324	FALSE	1.19e-07	0.612982	0.173896	-658.845
EBF1	0.00042456	0.00648997	0.538698	0.0945581	FALSE	2.5e-07	0.538698	0.152851	-820.207
SIRT1	0.000424619	0.00648997	-0.585745	0.0768043	FALSE	8.8e-08	-0.585745	0.166202	-675.901
NDFIP1	0.000428677	0.00654347	-0.207137	0.703975	FALSE	9.97e-08	-0.207137	0.0588161	-2817.47
EIF1B	0.000432707	0.00659639	-0.191335	0.965264	FALSE	4.12e-07	-0.191335	0.0543676	-3325.45
ZFR	0.000439034	0.00668414	-0.365601	0.189116	FALSE	4.79e-07	-0.365601	0.103999	-1254.42
RPS19	0.000443201	0.00673884	0.0877809	12.2609	FALSE	4.01e-07	0.0877809	0.024988	-8316.07
RBM14	0.000450354	0.00683873	-0.459633	0.11347	FALSE	9.2e-08	-0.459633	0.130999	-887.611
CCL19	0.000450998	0.00683965	0.775642	0.509842	FALSE	5.73e-09	0.775642	0.221088	-1244.9
CAT	0.000453106	0.00686274	-0.343503	0.211887	FALSE	1.36e-07	-0.343503	0.0979464	-1357.96
RANBP1	0.000455572	0.00689119	-0.20932	0.648784	FALSE	3.65e-07	-0.20932	0.0597102	-2691.83
FOS	0.000457319	0.00690869	0.140854	16.3269	FALSE	9.49e-08	0.140854	0.0401914	-9827.65
PPFIA2	0.000460434	0.00694681	1.12841	0.0223852	FALSE	1.25e-07	1.12841	0.322147	-270.59
SPOCK1	0.000462933	0.00697553	2.61705	0.0115785	FALSE	8.54e-09	2.61705	0.747444	-134.399
ZNF567	0.000464893	0.00699608	-0.8371	0.0351216	FALSE	2.41e-07	-0.8371	0.239157	-393.237
THSD4	0.000467536	0.00702682	0.937738	0.0355075	FALSE	1.71e-08	0.937738	0.268025	-369.824
CEBPD	0.000468969	0.00703034	-0.137607	4.50444	FALSE	1.17e-08	-0.137607	0.03934	-6690.17
RRAS2	0.000468896	0.00703034	-0.429056	0.139328	FALSE	4.35e-07	-0.429056	0.12266	-1054.8
RP4-621F18.2	0.000473079	0.00708289	-0.572074	0.0883829	FALSE	2.98e-08	-0.572074	0.163658	-784.088
MOAP1	0.00047479	0.00709944	-0.581104	0.0725589	FALSE	7.17e-08	-0.581104	0.166287	-650.367
SVIL	0.000482414	0.00720425	0.48086	0.115785	FALSE	5.79e-08	0.48086	0.137769	-941.68
NTF3	0.000483736	0.0072148	2.72497	0.00887688	FALSE	3.24e-08	2.72497	0.780883	-123.435
MFAP2	0.000487656	0.00726283	0.260801	0.483597	FALSE	5.72e-07	0.260801	0.0747828	-2403.51
CRELD1	0.000488195	0.00726283	-0.468649	0.114242	FALSE	4.34e-07	-0.468649	0.134393	-902.79
MTUS1	0.000489123	0.00726742	0.489601	0.117329	FALSE	1.89e-08	0.489601	0.140422	-915.302
PNISR	0.000490644	0.00726842	-0.18958	0.905056	FALSE	1.65e-07	-0.18958	0.0543863	-3334.6
OR2A1-AS1	0.00049105	0.00726842	-1.47823	0.0142802	FALSE	4.98e-08	-1.47823	0.424098	-193.013
TLCD2	0.000490512	0.00726842	-0.662169	0.0629101	FALSE	1.71e-08	-0.662169	0.189957	-564.091
ANG	0.000493788	0.00729972	-0.476654	0.115399	FALSE	7.13e-08	-0.476654	0.136808	-1002.31
MDK	0.000503945	0.00744049	0.196047	1.25897	FALSE	8.92e-09	0.196047	0.0563572	-4011.02
SENP6	0.00050671	0.00746252	-0.360481	0.199151	FALSE	2.13e-07	-0.360481	0.10367	-1314.93
COQ5	0.000506289	0.00746252	-0.596839	0.0679274	FALSE	2.51e-07	-0.596839	0.171633	-652.701
PDGFA	0.000511449	0.00752286	0.62539	0.0837514	FALSE	4.09e-08	0.62539	0.179984	-720.54
RFX2	0.000513385	0.00754187	-0.358609	0.213045	FALSE	4.63e-07	-0.358609	0.103236	-1441.74
KDSR	0.000514498	0.00754876	-0.314879	0.253956	FALSE	3.76e-07	-0.314879	0.0906625	-1541.02
BIRC3	0.00051908	0.00760593	-0.425849	0.249711	FALSE	1.17e-07	-0.425849	0.122698	-1413.11
SNAPC1	0.000519692	0.00760593	-0.279994	0.389811	FALSE	3.82e-08	-0.279994	0.0806806	-1983.2
CD164	0.000533339	0.00779592	-0.219796	0.617136	FALSE	1.05e-06	-0.219796	0.063462	-2652.85
KLHL26	0.000534958	0.00780985	-0.926143	0.0281745	FALSE	1.49e-07	-0.926143	0.26747	-322.787
TGFBR1	0.000540493	0.00788084	0.518861	0.101891	FALSE	2.71e-08	0.518861	0.149967	-845.064
SLC44A1	0.00054175	0.00788936	-0.333817	0.229641	FALSE	9.25e-07	-0.333817	0.0965008	-1489.95
KIF5B	0.000552819	0.00804057	-0.191023	0.768429	FALSE	6.41e-07	-0.191023	0.0553086	-2735.14
IFT57	0.000556789	0.00808828	-0.250672	0.405635	FALSE	1.95e-07	-0.250672	0.0726201	-1961.76
TMOD3	0.000562874	0.00816655	-0.245967	0.469703	FALSE	4.19e-07	-0.245967	0.0713174	-2186.7
IGHG3	0.000564691	0.00818279	-1.0414	0.118101	FALSE	7.17e-09	-1.0414	0.302028	-572.106
PARM1	0.000567858	0.00821851	1.0873	0.0247009	FALSE	8.48e-08	1.0873	0.315478	-307.496
COMT	0.000569384	0.00823044	-0.22674	0.526052	FALSE	5.8e-07	-0.22674	0.0658019	-2457.28
ABCC1	0.00057189	0.00825648	-0.72366	0.0436125	FALSE	9.53e-08	-0.72366	0.210085	-442.773
EIF4G1	0.000574093	0.00827809	-0.300315	0.27364	FALSE	6.06e-07	-0.300315	0.0872104	-1564.45
RDH10	0.000575235	0.00828437	-0.41433	0.181011	FALSE	9.6e-08	-0.41433	0.120339	-1234.16
TUSC2	0.000582894	0.00836385	-0.349553	0.137785	FALSE	0.0223429	-0.349553	0.101631	0
C1QTNF4	0.000582363	0.00836385	1.32663	0.0169819	FALSE	2.34e-08	1.32663	0.385682	-222.037
CTSH	0.000581796	0.00836385	0.623489	0.0764184	FALSE	1.26e-07	0.623489	0.181249	-661.216
RACGAP1	0.00058454	0.00837722	-0.989667	0.0277885	FALSE	2.49e-08	-0.989667	0.287804	-334.957
LEPROT	0.00058634	0.00839275	-0.181429	0.878039	FALSE	1.41e-06	-0.181429	0.0527738	-3048.53
PPP2R1A	0.000589389	0.00842611	-0.242557	0.445388	FALSE	3.22e-07	-0.242557	0.0705835	-2175.67
TMEM150A	0.000592903	0.00846602	-0.591159	0.0663836	FALSE	7.48e-08	-0.591159	0.172107	-626.099
SAA1	0.000594599	0.00847991	-2.10303	0.0192976	FALSE	1.56e-09	-2.10303	0.612403	-172.782
COL5A3	0.000599275	0.0085362	0.7145	0.0490158	FALSE	1.07e-07	0.7145	0.208191	-517.273
PDCD5	0.000600892	0.00854886	-0.214573	0.592049	FALSE	2.18e-07	-0.214573	0.0625357	-2517.98
CITED2	0.000603077	0.00856954	-0.279065	0.498649	FALSE	4.42e-08	-0.279065	0.0813546	-2408.49
PPARG	0.000607489	0.00861136	-1.03205	0.0227711	FALSE	7.42e-08	-1.03205	0.301044	-269.666
C16orf46	0.000607242	0.00861136	-1.58915	0.0111926	FALSE	8.04e-08	-1.58915	0.463531	-154.927
GNPNAT1	0.000608486	0.00861508	-0.399151	0.16017	FALSE	4.29e-08	-0.399151	0.116445	-1140.94
NFKBIZ	0.000610365	0.00863125	-0.201194	1.24971	FALSE	3.95e-08	-0.201194	0.058709	-3510.79
PHIP	0.00061291	0.00864639	-0.31761	0.247395	FALSE	7.69e-07	-0.31761	0.0927102	-1525.41
KRT18	0.000612249	0.00864639	0.910066	0.0405249	FALSE	1.32e-07	0.910066	0.265625	-414.008
ARHGAP24	0.000618045	0.00870835	-0.423397	0.153995	FALSE	1.41e-07	-0.423397	0.123671	-1171.27
PELI2	0.000621006	0.00873955	-0.600477	0.047472	FALSE	0.0355501	-0.600477	0.175462	-2.61312
GPSM1	0.000634541	0.00891934	-0.61677	0.0667696	FALSE	1.71e-07	-0.61677	0.180532	-623.636
PAK2	0.000636171	0.00893154	-0.291401	0.30413	FALSE	9.57e-08	-0.291401	0.0853123	-1714.29
CSNK1G1	0.000646144	0.00904988	-0.743989	0.0374373	FALSE	1.31e-07	-0.743989	0.218085	-386.592
SLC1A5	0.000645962	0.00904988	-0.275494	0.357391	FALSE	4.45e-08	-0.275494	0.0807536	-1872.25
PRKAR1A	0.000657657	0.00920013	-0.204111	0.726746	FALSE	1.06e-06	-0.204111	0.0599155	-2895.97
CASP2	0.000661175	0.00923833	-0.728092	0.0443844	FALSE	2.42e-07	-0.728092	0.213818	-465.217
ANXA5	0.000664422	0.00927264	-0.126393	2.54265	FALSE	7.18e-07	-0.126393	0.0371322	-4761.21
C19orf44	0.000665335	0.00927434	-1.89755	0.00926283	FALSE	2.21e-08	-1.89755	0.557532	-127.598
CCDC85B	0.000667778	0.00928807	-0.154772	1.54766	FALSE	7.08e-08	-0.154772	0.045488	-4044.05
TBC1D10A	0.000667904	0.00928807	-0.547932	0.0841374	FALSE	2.55e-08	-0.547932	0.161042	-721.935
ZBTB38	0.000673714	0.00935777	-0.264285	0.409108	FALSE	3.29e-08	-0.264285	0.0777295	-2030.14
BCL2L11	0.000683588	0.00948367	-0.804593	0.0362794	FALSE	4e-08	-0.804593	0.236918	-389.099
EPHA1-AS1	0.000684848	0.00948992	-2.1379	0.00849093	FALSE	3.76e-08	-2.1379	0.629613	-120.909
USP12	0.000686248	0.0094981	-0.470186	0.111154	FALSE	6.79e-08	-0.470186	0.138493	-887.094
LGI2	0.000688	0.00950719	0.666021	0.015824	FALSE	0.108766	0.666021	0.196216	-119.989
CDC6	0.000688527	0.00950719	-1.58774	0.0115785	FALSE	1.92e-08	-1.58774	0.467794	-160.483
RAB27A	0.000690816	0.00952757	-0.431171	0.132767	FALSE	2.06e-07	-0.431171	0.127069	-1016.31
ACO1	0.000693974	0.00955988	-0.406211	0.144346	FALSE	5.75e-08	-0.406211	0.119757	-1027.09
DSTYK	0.000695956	0.00957593	-0.612125	0.063296	FALSE	2.16e-07	-0.612125	0.180506	-598.3
TMEM150C	0.00069829	0.00959678	-0.649535	0.0559629	FALSE	1.49e-07	-0.649535	0.191589	-557.653
MEG3	0.000702533	0.00964378	0.209229	1.31918	FALSE	1.31e-08	0.209229	0.0617451	-3784.03
GNAI1	0.000707868	0.00970566	-0.370283	0.173292	FALSE	4.91e-07	-0.370283	0.10934	-1196.55
CREG1	0.000711094	0.0097385	-0.255172	0.390197	FALSE	1.32e-07	-0.255172	0.0753772	-1977.58
PPIL4	0.00071676	0.00980465	-0.260918	0.372057	FALSE	6.65e-07	-0.260918	0.0771242	-1972.35
SNRPN	0.00071883	0.00982149	-0.204541	0.663836	FALSE	1.05e-07	-0.204541	0.060474	-2735.75
BNIP3L	0.000722196	0.009856	-0.187455	0.941721	FALSE	3.89e-07	-0.187455	0.0554434	-3261.33
SLC51B	0.000727735	0.00992005	-0.955367	0.032034	FALSE	8.2e-08	-0.955367	0.282744	-367.83
ZNF397	0.000733359	0.0099851	-0.581702	0.0694712	FALSE	1.17e-07	-0.581702	0.172264	-667.51
LUC7L	0.000734266	0.00998585	-0.399449	0.145118	FALSE	5.35e-08	-0.399449	0.118304	-1070.95
LINC00936	0.000736145	0.00999979	-0.453086	0.12582	FALSE	1.61e-07	-0.453086	0.134218	-924.016
ZHX2	0.0007384	0.0100188	-0.513141	0.079506	FALSE	2.45e-07	-0.513141	0.152046	-717.412
PCK2	0.000742875	0.0100679	-1.1376	0.0185257	FALSE	5.17e-08	-1.1376	0.337242	-236.025
U2SURP	0.000743895	0.0100701	-0.270779	0.351988	FALSE	5.82e-07	-0.270779	0.0802815	-1959.75
RPL28	0.000747651	0.0101092	0.0810308	9.49325	FALSE	2.72e-07	0.0810308	0.0240342	-7388.56
GALNT1	0.000748551	0.0101098	-0.413207	0.133153	FALSE	9.65e-08	-0.413207	0.122572	-1037.48
GCSH	0.000750789	0.0101283	-0.292254	0.28406	FALSE	1.4e-07	-0.292254	0.086714	-1618.71
PPP1R3C	0.000752671	0.010142	-1.06442	0.0216133	FALSE	3.03e-08	-1.06442	0.315886	-262.77
MTERF2	0.000754049	0.0101489	-0.692512	0.0517175	FALSE	2.58e-07	-0.692512	0.205546	-556.184
TRIB1	0.00075506	0.0101509	-0.244518	0.578155	FALSE	8.61e-09	-0.244518	0.0725839	-2478.32
MRPL22	0.000757822	0.0101531	-0.282374	0.295639	FALSE	1.36e-07	-0.282374	0.0838462	-1777.22
ECM2	0.000757067	0.0101531	-0.301491	0.276727	FALSE	2.69e-07	-0.301491	0.0895156	-1698.16
TMEM87A	0.000757655	0.0101531	-0.278168	0.315322	FALSE	7.44e-07	-0.278168	0.082596	-1779.88
OSMR	0.000758949	0.0101566	-0.330262	0.210343	FALSE	7.35e-07	-0.330262	0.0980776	-1348.03
PDE1C	0.000764614	0.0102091	-1.27364	0.0142802	FALSE	4.55e-08	-1.27364	0.378462	-185.117
TPM4	0.000764142	0.0102091	-0.147315	1.82439	FALSE	1.2e-08	-0.147315	0.0437726	-4217.3
EGLN1	0.000771548	0.0102899	-0.563767	0.0690853	FALSE	2.46e-08	-0.563767	0.167648	-594.015
ECHDC2	0.000782313	0.0104061	-0.300625	0.280973	FALSE	2.44e-07	-0.300625	0.089499	-1736.21
SLC4A1AP	0.000782895	0.0104061	-0.603845	0.0586646	FALSE	2.4e-07	-0.603845	0.179781	-540.8
NAP1L1	0.00078292	0.0104061	-0.118516	2.7252	FALSE	8.98e-08	-0.118516	0.0352857	-5020.15
RBMS1	0.000790114	0.0104898	-0.156528	1.31764	FALSE	4.84e-07	-0.156528	0.0466379	-3852.89
XRN2	0.000793185	0.0105187	-0.239723	0.433809	FALSE	1.02e-07	-0.239723	0.071449	-2032.37
LZTS1	0.000796315	0.0105483	0.64383	0.0602084	FALSE	1.17e-07	0.64383	0.191955	-610.507
CCDC186	0.000800703	0.0105944	-0.333168	0.232729	FALSE	2.17e-08	-0.333168	0.0993775	-1448.02
ATP5B	0.000802501	0.0106062	-0.152933	1.18719	FALSE	8.2e-08	-0.152933	0.0456252	-3408.43
PMPCA	0.000805889	0.010639	-0.392876	0.148205	FALSE	4.84e-07	-0.392876	0.11725	-1089.51
BLVRB	0.000816235	0.0107635	-0.231535	0.477036	FALSE	1.52e-07	-0.231535	0.0691722	-2287.31
TMEM59L	0.000828335	0.0109108	0.886898	0.0312621	FALSE	6.75e-08	0.886898	0.265288	-333.887
ZBTB8A	0.000831265	0.0109248	-0.682972	0.0486299	FALSE	7.32e-08	-0.682972	0.20435	-496.554
TMEM43	0.000830598	0.0109248	-0.329877	0.212659	FALSE	5.44e-07	-0.329877	0.0986948	-1365.01
NDUFS1	0.000832416	0.0109277	-0.454837	0.102277	FALSE	4.34e-08	-0.454837	0.136106	-810.17
YIPF6	0.000835105	0.0109489	-0.302483	0.247781	FALSE	2.3e-07	-0.302483	0.0905398	-1550.06
GPC6	0.000835904	0.0109489	0.685105	0.0509456	FALSE	2.38e-07	0.685105	0.205083	-507.525
FERMT2	0.000853067	0.0111613	-0.222648	0.564647	FALSE	8.97e-08	-0.222648	0.0667616	-2550.51
DARS2	0.000855598	0.0111819	-1.84302	0.00849093	FALSE	0.00805232	-1.84302	0.552771	-88.0539
TRIB2	0.000858046	0.0111974	0.588357	0.0698572	FALSE	4.11e-08	0.588357	0.176506	-647.37
DLD	0.000858695	0.0111974	-0.384513	0.157082	FALSE	2.06e-07	-0.384513	0.11536	-1173.45
PPP1R15B	0.000865888	0.0112602	-0.366271	0.167503	FALSE	1.8e-07	-0.366271	0.109964	-1122.58
GRSF1	0.000865702	0.0112602	-0.355239	0.17831	FALSE	5.73e-07	-0.355239	0.10665	-1218.39
MTRF1L	0.000866391	0.0112602	-0.46114	0.102663	FALSE	1.79e-07	-0.46114	0.138453	-809.27
HSPA9	0.00087519	0.0113494	-0.223775	0.532999	FALSE	9.14e-07	-0.223775	0.0672432	-2315.55
AKR1B1	0.000874225	0.0113494	-0.259211	0.371671	FALSE	2.11e-07	-0.259211	0.0778844	-1933.21
C1orf167	0.000878443	0.011379	-0.863051	0.032034	FALSE	1.55e-07	-0.863051	0.259422	-349.906
KIAA1217	0.000884452	0.0114442	0.88849	0.0339637	FALSE	7.92e-08	0.88849	0.267222	-357.758
KPNA6	0.000886237	0.0114546	-0.347289	0.185257	FALSE	5.07e-07	-0.347289	0.104468	-1237.3
LAMB1	0.000887405	0.0114571	-0.290504	0.277113	FALSE	5.39e-07	-0.290504	0.0873963	-1614.01
SNX19	0.000891397	0.011496	-0.755525	0.0385951	FALSE	2.44e-08	-0.755525	0.22738	-413.604
DNALI1	0.000921127	0.0118533	-0.467555	0.104593	FALSE	2.7e-07	-0.467555	0.141103	-879.401
FILIP1L	0.00092059	0.0118533	0.19889	0.962563	FALSE	1.63e-07	0.19889	0.0600197	-3573.28
IPO7	0.000926437	0.0119086	-0.295226	0.275183	FALSE	1.74e-07	-0.295226	0.0891393	-1625.35
IAH1	0.000929062	0.0119292	-0.269559	0.33462	FALSE	1.56e-07	-0.269559	0.0814089	-1843.46
MEF2C	0.000932519	0.0119346	0.513403	0.105365	FALSE	1.41e-08	0.513403	0.155101	-894.152
NEAT1	0.000930779	0.0119346	-0.116353	9.95253	FALSE	3.8e-08	-0.116353	0.0351451	-7990.46
MRPL48	0.000932532	0.0119346	-0.497635	0.0864531	FALSE	7.92e-08	-0.497635	0.150337	-754.72
DNAJC25	0.000940512	0.0120236	-0.515304	0.0798919	FALSE	3.04e-07	-0.515304	0.155787	-675.402
SECISBP2	0.000955813	0.0122059	-0.496384	0.0868391	FALSE	1.63e-07	-0.496384	0.150273	-763.786
CYP7B1	0.000966408	0.0123144	-0.359501	0.188344	FALSE	9.07e-08	-0.359501	0.108935	-1212.96
ESAM	0.000966149	0.0123144	0.956416	0.0304902	FALSE	5.7e-08	0.956416	0.289805	-330.416
STK40	0.000981894	0.0124981	-0.524107	0.0768043	FALSE	4.82e-08	-0.524107	0.159029	-651.901
ACTG2	0.000985858	0.0125349	0.551347	0.108838	FALSE	4.93e-08	0.551347	0.167352	-878.758
LRRC8B	0.000988816	0.0125521	-0.597696	0.0605944	FALSE	3.27e-08	-0.597696	0.181467	-558.389
KIAA0408	0.000989347	0.0125521	-1.60372	0.0119645	FALSE	1.04e-07	-1.60372	0.486929	-178.455
PPARGC1A	0.000997164	0.0126103	-0.892631	0.0331918	FALSE	6.16e-09	-0.892631	0.271207	-357.31
SNCA	0.00099569	0.0126103	-0.603371	0.0659977	FALSE	2.32e-08	-0.603371	0.183298	-621.813
TIMM10B	0.000996996	0.0126103	-0.45549	0.101891	FALSE	3.84e-07	-0.45549	0.138389	-876.684
SNAP25	0.000999975	0.0126322	-0.431381	0.121961	FALSE	2.85e-08	-0.431381	0.131097	-905.554
NPDC1	0.00101419	0.012798	0.307585	0.245851	FALSE	1.21e-07	0.307585	0.0935888	-1489.4
PPA1	0.00101644	0.0128126	-0.17413	0.916635	FALSE	5.12e-07	-0.17413	0.0529926	-3092.83
RHEB	0.0010187	0.0128273	-0.169437	0.999228	FALSE	1.07e-06	-0.169437	0.051574	-3355.95
PPIC	0.00102408	0.0128813	0.169671	1.02933	FALSE	3.11e-07	0.169671	0.0516686	-3411.43
AK1	0.00102841	0.0129218	-0.241427	0.468931	FALSE	9.42e-07	-0.241427	0.0735466	-2304.63
ARHGAP1	0.00103492	0.0129897	0.53223	0.0779622	FALSE	3.94e-07	0.53223	0.162223	-719.848
MED31	0.00103701	0.013002	-0.333225	0.192204	FALSE	4.55e-07	-0.333225	0.101584	-1349.56
RPL18	0.00104271	0.0130595	0.0841517	6.52181	FALSE	1.01e-07	0.0841517	0.0256658	-6594.57
NUMBL	0.00105259	0.0131692	-0.424647	0.117329	FALSE	1.84e-07	-0.424647	0.129621	-938.185
TOMM20	0.00105466	0.013181	-0.216174	0.499421	FALSE	2e-07	-0.216174	0.0659968	-2265.38
PGF	0.00105592	0.0131827	0.63468	0.0737167	FALSE	7.38e-08	0.63468	0.193784	-667.279
UBXN2A	0.00106271	0.0132533	-0.45659	0.104593	FALSE	1.03e-07	-0.45659	0.139486	-897.378
PTPN2	0.00106735	0.0132971	-0.329614	0.209186	FALSE	9.74e-08	-0.329614	0.100733	-1363.88
MICAL2	0.00107565	0.0133862	0.696537	0.0482439	FALSE	5.15e-08	0.696537	0.213011	-474.608
TMEM106C	0.00108371	0.0134723	0.652237	0.0571208	FALSE	5.13e-08	0.652237	0.199593	-568.886
MAGED1	0.00108522	0.0134768	-0.277822	0.300656	FALSE	3.74e-07	-0.277822	0.0850274	-1593.81
TXNIP	0.00108836	0.0134871	0.305831	0.330374	FALSE	4.68e-07	0.305831	0.0936229	-1947.28
ZNF286A	0.00108778	0.0134871	-1.2094	0.0131223	FALSE	0.0113231	-1.2094	0.370211	-87.7647
TPM1	0.00109085	0.0135038	0.17186	1.31262	FALSE	5.07e-09	0.17186	0.0526213	-3808.27
UQCRC2	0.00110085	0.0136132	-0.228265	0.432266	FALSE	2.3e-07	-0.228265	0.0699469	-2074.18
USP36	0.00110326	0.0136285	-0.479131	0.0903126	FALSE	2.17e-07	-0.479131	0.146847	-765.343
TAZ	0.00110585	0.0136462	-0.744539	0.0385951	FALSE	1.31e-07	-0.744539	0.228238	-433.687
MAGT1	0.0011101	0.0136842	-0.371478	0.152451	FALSE	5.84e-07	-0.371478	0.113914	-1094.97
GNB2L1	0.00111877	0.0137766	0.0871836	5.63103	FALSE	2.77e-08	0.0871836	0.0267531	-6279.27
CDON	0.00112256	0.0138088	-1.43181	0.0123504	FALSE	2.65e-08	-1.43181	0.439494	-163.099
RRP8	0.00112819	0.0138635	-0.500494	0.07912	FALSE	1.05e-07	-0.500494	0.153694	-698.138
IRX3	0.00113519	0.0139349	-0.936711	0.0297183	FALSE	2.71e-08	-0.936711	0.287804	-340.004
MIR4435-2HG	0.00113981	0.0139769	0.272755	0.744886	FALSE	9.61e-09	0.272755	0.0838336	-2902.04
RNF2	0.00114227	0.0139779	-0.70077	0.0409108	FALSE	9.54e-08	-0.70077	0.215428	-425.989
DDT	0.00114178	0.0139779	-0.218801	0.496333	FALSE	7.58e-07	-0.218801	0.0672604	-2311.71
GBP1	0.00114659	0.0140162	-0.350529	0.226939	FALSE	1.11e-07	-0.350529	0.107794	-1413.98
CEMIP	0.00116497	0.014226	-1.10531	0.0266306	FALSE	3.72e-08	-1.10531	0.340375	-296.986
NAA15	0.00116803	0.0142363	-0.328602	0.208414	FALSE	2.92e-07	-0.328602	0.101215	-1363.49
NUP205	0.00116825	0.0142363	-0.874796	0.0254728	FALSE	7.19e-08	-0.874796	0.269456	-293.055
KLF6	0.00117573	0.0142977	-0.140619	3.55693	FALSE	4.67e-09	-0.140619	0.0433379	-5735.44
TMEM11	0.00117522	0.0142977	-0.29935	0.240448	FALSE	2.05e-07	-0.29935	0.0922546	-1534.7
PRDX3	0.00117829	0.0143141	-0.26243	0.318024	FALSE	6.65e-07	-0.26243	0.0808948	-1752.22
TMEM41B	0.00118065	0.0143279	-0.406973	0.131995	FALSE	1.28e-07	-0.406973	0.125473	-1018.11
ROCK2	0.00122009	0.0147913	-0.292327	0.26785	FALSE	3.78e-07	-0.292327	0.0903879	-1572.72
TNFAIP2	0.00123253	0.0149266	-0.312524	0.294867	FALSE	1.3e-07	-0.312524	0.0967196	-1700.92
LMAN1	0.00123459	0.0149362	-0.218991	0.492474	FALSE	3.03e-07	-0.218991	0.067783	-2094.81
PSAP	0.00124109	0.0149993	-0.115717	2.76496	FALSE	4.21e-08	-0.115717	0.035834	-5102.03
KCTD3	0.00125506	0.0151525	-0.472091	0.0852953	FALSE	3.01e-07	-0.472091	0.146337	-721.131
SP3	0.00125959	0.0151794	-0.476068	0.101505	FALSE	1.27e-07	-0.476068	0.147617	-860.554
TMEM204	0.00125988	0.0151794	0.455564	0.120031	FALSE	6.49e-08	0.455564	0.141262	-959.311
SKIL	0.00127036	0.01529	-0.265965	0.362408	FALSE	9.99e-08	-0.265965	0.0825312	-1993.85
EBP	0.00128381	0.015436	-0.444675	0.106909	FALSE	4.18e-08	-0.444675	0.138116	-876.791
PPRC1	0.00129514	0.0155562	-0.499838	0.0841374	FALSE	2.3e-07	-0.499838	0.155371	-716.458
C2CD4A	0.00129863	0.0155663	-1.63433	0.0115785	FALSE	1.03e-09	-1.63433	0.508143	-150.777
ELL	0.00129799	0.0155663	-0.376679	0.148205	FALSE	4.04e-07	-0.376679	0.117111	-1099.64
HIPK1	0.00130814	0.0156643	-0.365668	0.155538	FALSE	8.87e-08	-0.365668	0.113767	-1121.13
TUBB	0.00131157	0.0156893	-0.139352	1.61443	FALSE	4.12e-08	-0.139352	0.0433656	-3959.14
PGM5	0.00131959	0.0157692	-0.892269	0.0304902	FALSE	1.34e-08	-0.892269	0.27782	-339.59
HMOX1	0.00132531	0.0158214	-0.478131	0.247395	FALSE	1.2e-08	-0.478131	0.14893	-1247.91
PTPRG	0.00133314	0.0158987	-0.440102	0.111926	FALSE	1.43e-07	-0.440102	0.137157	-954.04
SPATA13	0.00135493	0.0161421	-0.457283	0.100733	FALSE	3.39e-07	-0.457283	0.142719	-839.629
2002-03-01	0.00136697	0.016269	-0.392615	0.133925	FALSE	1.35e-07	-0.392615	0.122633	-1003.15
PYCR2	0.00136884	0.0162694	-0.40366	0.126592	FALSE	1.06e-07	-0.40366	0.126099	-995.268
TMEM115	0.00137002	0.0162694	-0.357581	0.159398	FALSE	6.62e-07	-0.357581	0.111713	-1140.72
ELOVL3	0.00137116	0.0162694	-1.63719	0.00926283	FALSE	5.49e-08	-1.63719	0.511518	-129.512
SSR1	0.00137322	0.0162773	-0.25741	0.331146	FALSE	1.07e-07	-0.25741	0.0804351	-1742.95
DYNC2LI1	0.0013872	0.0164264	-0.333621	0.198379	FALSE	1.86e-07	-0.333621	0.104345	-1368.52
PPT2	0.00139396	0.0164869	-0.703082	0.0451563	FALSE	4.59e-08	-0.703082	0.219995	-466.562
TOMM7	0.00139512	0.0164869	-0.11263	2.73369	FALSE	6.48e-07	-0.11263	0.0352448	-5280.81
SQLE	0.00139824	0.0164955	0.560596	0.0706291	FALSE	1.05e-08	0.560596	0.17546	-614.884
NRP1	0.00139866	0.0164955	-0.280612	0.288306	FALSE	7.35e-07	-0.280612	0.0878305	-1740.41
TWIST2	0.00141044	0.0166177	0.404956	0.163257	FALSE	3.11e-08	0.404956	0.126846	-1088.16
TMEM120A	0.00141693	0.0166774	-0.432608	0.109224	FALSE	1.15e-07	-0.432608	0.135563	-909.69
PRKAR2B	0.00142436	0.0167312	0.994182	0.023543	FALSE	5.61e-08	0.994182	0.311688	-279.945
AUH	0.00142345	0.0167312	-0.506925	0.0779622	FALSE	9.4e-08	-0.506925	0.158918	-675.604
SEC61B	0.0014346	0.0168346	-0.127126	1.87302	FALSE	5.99e-08	-0.127126	0.0398813	-4175.47
SCT	0.00144116	0.0168948	-1.46461	0.0169819	FALSE	1.98e-08	-1.46461	0.459661	-208.462
SCTR	0.00145273	0.0170133	-2.00849	0.00771903	FALSE	3.83e-08	-2.00849	0.630813	-117.22
SND1	0.00145958	0.0170765	-0.339307	0.17252	FALSE	8.64e-08	-0.339307	0.106613	-1096.48
CHI3L2	0.00146327	0.0170979	-0.613796	0.127364	FALSE	1e-08	-0.613796	0.192904	-834.157
SPTAN1	0.00146438	0.0170979	-0.267984	0.301814	FALSE	4.17e-07	-0.267984	0.0842279	-1703.74
INTS6	0.00146581	0.0170979	-0.2625	0.378232	FALSE	4.81e-08	-0.2625	0.0825116	-2054.83
ITPRIPL2	0.00146724	0.0170979	-0.328268	0.185643	FALSE	7.22e-08	-0.328268	0.103194	-1233.66
HSPB8	0.00149581	0.0174134	-0.288546	0.322655	FALSE	4.89e-07	-0.288546	0.0908666	-1866.45
RCAN2	0.00150191	0.0174671	-0.374089	0.169819	FALSE	1.77e-08	-0.374089	0.117849	-1178.14
BDH2	0.00150803	0.017521	-0.242507	0.378618	FALSE	2.7e-07	-0.242507	0.0764252	-1990.75
MCFD2	0.00151631	0.0175997	-0.295849	0.238904	FALSE	8.64e-07	-0.295849	0.0932823	-1486.69
CSF3	0.00152034	0.0176291	-1.3722	0.023929	FALSE	9.27e-09	-1.3722	0.432765	-218.573
SERTAD4-AS1	0.00153937	0.017832	1.34407	0.0138942	FALSE	3.37e-08	1.34407	0.424378	-194.43
IL1RAP	0.00154254	0.0178511	-0.596316	0.0586646	FALSE	3.05e-08	-0.596316	0.188317	-577.656
ODF2L	0.00155326	0.0179574	-0.28347	0.271324	FALSE	1.05e-07	-0.28347	0.0895768	-1601.93
KIF1BP	0.00155886	0.0180045	-0.431318	0.11154	FALSE	1.05e-07	-0.431318	0.136342	-891.47
SLC22A23	0.00157364	0.0181539	-1.21728	0.0146662	FALSE	1.94e-08	-1.21728	0.385123	-181.658
SYNE1	0.0015749	0.0181539	-0.275044	0.305673	FALSE	2.75e-08	-0.275044	0.0870251	-1744.35
HEG1	0.00158616	0.0182478	-0.295075	0.255886	FALSE	4.12e-07	-0.295075	0.0934244	-1474.97
SCPEP1	0.00158565	0.0182478	0.209128	0.545735	FALSE	9.54e-08	0.209128	0.0662103	-2437.04
NFKB1	0.00159691	0.0183356	-0.340055	0.191818	FALSE	3.88e-07	-0.340055	0.107733	-1250.41
HRAS	0.00159598	0.0183356	-0.405319	0.125048	FALSE	6.01e-08	-0.405319	0.128402	-1024.2
UGP2	0.00159899	0.0183415	-0.212729	0.537244	FALSE	1.37e-07	-0.212729	0.0674026	-2459.74
SLC39A14	0.00160143	0.0183515	-0.453806	0.0980316	FALSE	3.66e-08	-0.453806	0.143808	-775.532
MTHFD1L	0.0016109	0.018442	-0.324	0.200309	FALSE	1.23e-07	-0.324	0.102729	-1314.71
PC	0.00161591	0.0184813	-0.981318	0.0219992	FALSE	9.18e-08	-0.981318	0.311231	-265.315
GSR	0.00161922	0.0185011	-1.01593	0.0185257	FALSE	1.26e-07	-1.01593	0.32227	-236.924
NDUFS2	0.00162205	0.0185154	-0.209876	0.519491	FALSE	3.99e-07	-0.209876	0.0665868	-2422.39
AVPR1A	0.00162725	0.0185387	1.55815	0.0135083	FALSE	1.43e-08	1.55815	0.494497	-172.317
ZNF569	0.00162718	0.0185387	-1.30954	0.0123504	FALSE	9.51e-08	-1.30954	0.415597	-168.582
LAMC2	0.00163717	0.0185615	-1.27416	0.0165959	FALSE	4.52e-08	-1.27416	0.404597	-198.854
LBH	0.0016345	0.0185615	-0.231048	0.604786	FALSE	1.04e-07	-0.231048	0.0733562	-2766.28
NRP2	0.00163366	0.0185615	-0.304614	0.256272	FALSE	2.43e-07	-0.304614	0.0967081	-1562.88
MGAT1	0.00163628	0.0185615	-0.26109	0.322655	FALSE	4.32e-08	-0.26109	0.0829026	-1721.64
ZNF565	0.00163196	0.0185615	-1.08035	0.0181397	FALSE	2.12e-08	-1.08035	0.342953	-229.881
NTRK2	0.00164309	0.0186106	1.0007	0.0227711	FALSE	7.88e-08	1.0007	0.317871	-276.569
NUDT19	0.00164621	0.0186279	-0.910699	0.0258587	FALSE	8.74e-08	-0.910699	0.289332	-292.326
C10orf54	0.00165405	0.0186986	-0.30102	0.240448	FALSE	1.75e-07	-0.30102	0.0956772	-1533.31
STON1	0.00165854	0.0187132	-0.478469	0.0930143	FALSE	7.72e-08	-0.478469	0.152117	-838.211
POM121	0.00165756	0.0187132	-0.568787	0.0605944	FALSE	1.01e-07	-0.568787	0.180821	-543.607
FXYD5	0.00166026	0.0187146	-0.263501	0.345426	FALSE	2.05e-07	-0.263501	0.0837813	-1795.49
AKAP12	0.00166852	0.0187897	-0.178829	1.32304	FALSE	6.02e-08	-0.178829	0.0568858	-3916.34
PLXND1	0.00168062	0.0189078	-0.470723	0.0852953	FALSE	1e-07	-0.470723	0.149838	-757.757
PPM1K	0.00168756	0.0189419	-0.46936	0.0991895	FALSE	1.47e-07	-0.46936	0.149462	-855.598
CTSD	0.0016878	0.0189419	0.212042	0.583944	FALSE	4.45e-08	0.212042	0.0675232	-2667.9
PPP2R5E	0.0016885	0.0189419	-0.395078	0.121961	FALSE	1.44e-07	-0.395078	0.125814	-969.389
RAP2C	0.00169068	0.0189482	-0.587815	0.0540332	FALSE	5.12e-08	-0.587815	0.187215	-522.608
RP11-629O1.2	0.0017025	0.0190625	-1.20756	0.0154381	FALSE	4.17e-08	-1.20756	0.38485	-200.968
PALLD	0.00172735	0.0193147	-0.178311	0.798147	FALSE	3.75e-07	-0.178311	0.0569046	-2887.53
MEIS3	0.00172997	0.0193147	0.667174	0.0439985	FALSE	5.91e-08	0.667174	0.212947	-435.168
FAM207A	0.00172997	0.0193147	-0.348169	0.172906	FALSE	1.14e-07	-0.348169	0.111128	-1195.21
TAX1BP3	0.0017418	0.0194283	0.214083	0.497105	FALSE	2.84e-07	0.214083	0.068374	-2160.93
STAG2	0.00175353	0.0195405	-0.428449	0.106137	FALSE	6.07e-08	-0.428449	0.136925	-865.974
CXCL1	0.00178078	0.0198253	-0.498595	0.95137	FALSE	2.23e-08	-0.498595	0.159573	-1903.88
PPP1R1B	0.00180588	0.0200857	1.53203	0.0119645	FALSE	2.51e-08	1.53203	0.490967	-160.85
KLHL24	0.00183054	0.0203214	-0.453729	0.0964878	FALSE	9.15e-08	-0.453729	0.145593	-820.025
ZNF207	0.00183053	0.0203214	-0.229507	0.3956	FALSE	7.66e-07	-0.229507	0.073644	-2014.87
GABRE	0.00183535	0.0203555	-0.584236	0.0578927	FALSE	6.28e-08	-0.584236	0.187516	-572.164
RPRD2	0.00184205	0.0204034	-0.574258	0.0567349	FALSE	1.74e-07	-0.574258	0.184377	-560.081
SPATS2L	0.00184315	0.0204034	0.224333	0.482825	FALSE	8.52e-08	0.224333	0.0720309	-2446.35
JARID2	0.0018536	0.0204804	-0.478201	0.0934002	FALSE	1.54e-07	-0.478201	0.153627	-766.001
C12orf45	0.00185303	0.0204804	-0.397903	0.121575	FALSE	5.22e-07	-0.397903	0.127827	-954.544
LDHB	0.00185899	0.0205206	-0.128816	1.49904	FALSE	7e-07	-0.128816	0.0413948	-3781
RAB5A	0.00189267	0.0208581	-0.315492	0.196449	FALSE	6.89e-07	-0.315492	0.101556	-1308.38
ENG	0.00189312	0.0208581	-0.196972	0.608645	FALSE	1.1e-06	-0.196972	0.0634063	-2556.1
DAZAP1	0.00189673	0.0208782	-0.35946	0.144346	FALSE	2.28e-07	-0.35946	0.115733	-1084.2
CSF1	0.00191718	0.0210836	-0.393088	0.139328	FALSE	4.05e-08	-0.393088	0.126689	-1039.94
PTGER4	0.00193725	0.0212844	-0.321303	0.219992	FALSE	5.29e-08	-0.321303	0.103657	-1469.15
FAM3A	0.00194342	0.0213321	-0.401941	0.119645	FALSE	1.14e-07	-0.401941	0.129711	-957.572
CAPZA2	0.00194721	0.0213538	-0.183088	0.738711	FALSE	8.59e-08	-0.183088	0.0590955	-2964.85
SLC4A4	0.00196549	0.0215341	-1.4534	0.0100347	FALSE	5.94e-08	-1.4534	0.469535	-142.821
UROD	0.00197082	0.0215522	-0.279098	0.250482	FALSE	9.84e-07	-0.279098	0.0901889	-1536.47
SMAGP	0.00196902	0.0215522	-0.649454	0.0331918	FALSE	0.123067	-0.649454	0.209849	0
NDUFV1	0.00198274	0.0216623	-0.249307	0.334234	FALSE	8.21e-07	-0.249307	0.0806088	-1874.99
LINC00969	0.00200348	0.0218482	-0.302154	0.226553	FALSE	2.59e-07	-0.302154	0.0977934	-1456.66
EBAG9	0.00200184	0.0218482	-0.398623	0.121575	FALSE	5.98e-08	-0.398623	0.129006	-980.759
SEMA5A	0.00200628	0.0218584	0.518486	0.0783481	FALSE	7.46e-08	0.518486	0.167833	-691.722
FOXJ3	0.00201338	0.0218842	-0.55798	0.0578927	FALSE	2.33e-07	-0.55798	0.180678	-568.824
ST3GAL5	0.00201301	0.0218842	-0.569003	0.0613663	FALSE	1.78e-08	-0.569003	0.184244	-563.501
IGSF10	0.0020147	0.0218842	-0.544705	0.0733308	FALSE	7.41e-08	-0.544705	0.176391	-696.914
ACER3	0.00201611	0.0218842	-0.578899	0.0586646	FALSE	1.07e-07	-0.578899	0.187477	-587.756
ZNF646	0.00202731	0.0219854	-1.72524	0.00771903	FALSE	0.0108034	-1.72524	0.559017	-33.0277
TRIM56	0.0020389	0.0220906	-0.300922	0.238132	FALSE	1.65e-07	-0.300922	0.097559	-1488.07
ECHDC3	0.00205542	0.0222285	-0.785728	0.032034	FALSE	5.78e-08	-0.785728	0.254932	-367.285
AKAP8	0.00205529	0.0222285	-0.524971	0.0683134	FALSE	1.02e-07	-0.524971	0.170328	-649.727
STIM2	0.00206322	0.0222923	-0.378105	0.152451	FALSE	1.28e-08	-0.378105	0.122722	-1103.6
CERCAM	0.00206594	0.0223011	0.277493	0.260903	FALSE	1.65e-07	0.277493	0.0900781	-1538.44
C1RL-AS1	0.00208966	0.0225364	-0.704104	0.0374373	FALSE	4.16e-08	-0.704104	0.228815	-408.972
CAB39L	0.00209796	0.0226051	-0.353117	0.171362	FALSE	9.32e-08	-0.353117	0.114798	-1250.28
GOLT1B	0.0021023	0.0226311	-0.299777	0.218448	FALSE	7.15e-07	-0.299777	0.0974764	-1426.31
TPT1	0.00211317	0.0227272	-0.0764039	12.2416	FALSE	3.3e-08	-0.0764039	0.0248561	-7795.67
PON2	0.00212441	0.0228063	-0.323935	0.189116	FALSE	3.9e-07	-0.323935	0.105438	-1292.96
A1BG	0.00212292	0.0228063	0.423673	0.123504	FALSE	1.89e-07	0.423673	0.137893	-1090.47
TEX30	0.00212957	0.0228407	-0.476636	0.0806638	FALSE	2.03e-07	-0.476636	0.155178	-724.312
DCAF16	0.00213964	0.0229278	-0.562208	0.0420687	FALSE	0.00827894	-0.562208	0.183122	0
DTX4	0.00215207	0.0230399	-0.572653	0.0582787	FALSE	6.52e-08	-0.572653	0.186629	-555.058
EGR3	0.00215767	0.0230578	0.341351	0.194519	FALSE	5.3e-08	0.341351	0.111275	-1227.36
TMEM230	0.00215608	0.0230578	-0.179774	0.709379	FALSE	1.06e-07	-0.179774	0.0585995	-2819.04
AKAP2	0.00217085	0.0231603	-1.12123	0.0150521	FALSE	4.64e-08	-1.12123	0.365722	-191.092
NUDT7	0.00217122	0.0231603	-1.12733	0.015824	FALSE	4.5e-08	-1.12733	0.367716	-211.421
SCAMP3	0.00218704	0.0233079	-0.38508	0.130066	FALSE	4.98e-07	-0.38508	0.125696	-1028.7
TWIST1	0.00219351	0.0233556	0.734398	0.0416827	FALSE	1.2e-08	0.734398	0.239788	-443.377
TOR1AIP1	0.00220209	0.0234045	-0.375208	0.137785	FALSE	7.15e-08	-0.375208	0.122556	-1054.28
CCDC170	0.00220162	0.0234045	-1.15688	0.0142802	FALSE	9.14e-08	-1.15688	0.377868	-190.938
UBE2D3	0.00220976	0.0234647	-0.136741	1.32497	FALSE	9.34e-07	-0.136741	0.0446796	-3756.12
ZSWIM4	0.00221851	0.0235363	-0.60845	0.0528753	FALSE	2.59e-08	-0.60845	0.198885	-529.732
MGST2	0.0022308	0.0236453	-0.328777	0.183713	FALSE	5.79e-07	-0.328777	0.107526	-1306.52
HACD4	0.00225133	0.0238413	0.613841	0.0575068	FALSE	3.35e-08	0.613841	0.200936	-578.961
H6PD	0.00226096	0.0238809	-0.362147	0.146662	FALSE	1.05e-07	-0.362147	0.118596	-1057.9
VEGFC	0.00226118	0.0238809	-0.693793	0.0424547	FALSE	9.07e-08	-0.693793	0.227205	-427.349
RP11-298J20.3	0.00225966	0.0238809	-0.61193	0.055191	FALSE	2.08e-07	-0.61193	0.200383	-565.906
LINC01588	0.00228652	0.0241268	-1.84868	0.00849093	FALSE	1.17e-10	-1.84868	0.606076	-109.843
SCARA3	0.00229032	0.0241451	0.462495	0.0961019	FALSE	1.29e-08	0.462495	0.15165	-763.228
RP11-119B16.2	0.00232352	0.0244732	-1.38441	0.0115785	FALSE	2.74e-08	-1.38441	0.454585	-166.557
NF1	0.00232849	0.0245035	-0.408086	0.107294	FALSE	3.62e-07	-0.408086	0.134028	-856.469
ARHGAP15	0.00234679	0.0246739	0.38932	0.155538	FALSE	8.68e-08	0.38932	0.127964	-1218.98
UNG	0.00235912	0.0247813	-0.817196	0.0274025	FALSE	1.64e-07	-0.817196	0.268739	-334.888
PLA2G5	0.00236589	0.0247897	-0.386197	0.144346	FALSE	1.54e-07	-0.386197	0.127039	-1145.28
RP11-125O18.1	0.00236338	0.0247897	-0.328628	0.209958	FALSE	2.11e-07	-0.328628	0.10809	-1506.09
PCSK1N	0.00236626	0.0247897	1.16595	0.0243149	FALSE	7.37e-09	1.16595	0.383542	-251.696
TPR	0.00237977	0.0248632	-0.222186	0.424547	FALSE	8.98e-08	-0.222186	0.0731304	-2044.61
HLA-E	0.00238176	0.0248632	-0.147815	1.21266	FALSE	7.43e-07	-0.147815	0.0486558	-3757.91
RPL8	0.00237755	0.0248632	0.0729271	8.80124	FALSE	3.82e-08	0.0729271	0.024001	-7268.19
GRIK4	0.00237939	0.0248632	-1.01157	0.0196835	FALSE	1.1e-07	-1.01157	0.332941	-253.384
FAIM2	0.00239685	0.0249984	0.782843	0.0366654	FALSE	1.47e-08	0.782843	0.257847	-347.217
ACTN2	0.00240373	0.0250257	-1.45919	0.0111926	FALSE	2.25e-08	-1.45919	0.480754	-156.691
ADGRA2	0.00240249	0.0250257	0.502201	0.0710151	FALSE	2.7e-07	0.502201	0.16545	-652.653
PKNOX2	0.00241691	0.0251183	-0.824929	0.0274025	FALSE	3.86e-08	-0.824929	0.271935	-323.575
LRP1	0.00241535	0.0251183	-0.157783	1.02316	FALSE	1.3e-07	-0.157783	0.0520091	-3494.24
LTC4S	0.00241977	0.0251257	1.34899	0.0131223	FALSE	1.68e-08	1.34899	0.444741	-181.312
POLG2	0.00242584	0.0251665	-0.809473	0.0293323	FALSE	7.93e-08	-0.809473	0.266938	-343.657
PTGES	0.00243926	0.0252833	-0.289274	0.289464	FALSE	1.32e-07	-0.289274	0.0954455	-1686.78
IL1RL1	0.00245429	0.0254167	-0.971768	0.105365	FALSE	1.77e-09	-0.971768	0.32083	-478.099
SDK2	0.00245912	0.0254442	-0.55942	0.0559629	FALSE	1.65e-07	-0.55942	0.184729	-555.464
DDIT3	0.00248978	0.0257387	0.280921	0.308761	FALSE	3.27e-07	0.280921	0.0928793	-1769.81
PRKDC	0.00251843	0.026012	-0.336323	0.157082	FALSE	8.38e-08	-0.336323	0.111324	-1098.63
CCDC173	0.00253359	0.0261455	-0.811863	0.0293323	FALSE	1.29e-07	-0.811863	0.268891	-346.811
MPC1	0.00253806	0.0261595	-0.273007	0.252026	FALSE	9.43e-08	-0.273007	0.0904367	-1556.27
RNASET2	0.00253941	0.0261595	-0.345607	0.163643	FALSE	5.94e-07	-0.345607	0.114492	-1206.77
UQCR10	0.002553	0.0262764	-0.151793	1.07758	FALSE	8.35e-08	-0.151793	0.0503128	-3597.4
RPS18	0.0025713	0.0264184	0.0642248	18.5473	FALSE	2.28e-07	0.0642248	0.021303	-8962.07
RP3-325F22.5	0.00257031	0.0264184	-1.07222	0.0231571	FALSE	1.09e-08	-1.07222	0.355635	-287.371
TTF2	0.00257363	0.0264192	-0.931308	0.0227711	FALSE	2.58e-08	-0.931308	0.308938	-272.321
NMRK1	0.00259153	0.0265796	-0.407823	0.117715	FALSE	4.3e-07	-0.407823	0.13538	-1001.53
MT1M	0.00261276	0.026774	-0.228022	2.5851	FALSE	2e-08	-0.228022	0.0757555	-5301.24
ZSWIM8	0.00264165	0.0270464	-0.537966	0.0625241	FALSE	1.22e-07	-0.537966	0.178927	-618.162
AGTRAP	0.00264705	0.0270779	-0.270254	0.26978	FALSE	1.93e-07	-0.270254	0.0899046	-1618.35
ORC3	0.00265718	0.0271579	-0.675472	0.039367	FALSE	6.52e-08	-0.675472	0.224794	-445.092
TRAF3IP2	0.00266187	0.0271821	-0.435535	0.0926283	FALSE	7.79e-08	-0.435535	0.14497	-754.853
PYM1	0.00267228	0.0272647	-0.381608	0.121961	FALSE	8.13e-08	-0.381608	0.12707	-968.365
SPG20	0.00268395	0.0273599	-0.240461	0.353531	FALSE	1.55e-07	-0.240461	0.0801057	-1919.01
SPAG9	0.00269112	0.0274092	-0.27011	0.255886	FALSE	7.24e-07	-0.27011	0.0900072	-1530.39
RP5-1065J22.8	0.00269566	0.0274183	-0.861643	0.0243149	FALSE	3.75e-08	-0.861643	0.28717	-285.031
WNT5A	0.00269669	0.0274183	1.2992	0.0150521	FALSE	1.59e-08	1.2992	0.433015	-188.848
UBTD1	0.00270366	0.0274653	0.496165	0.0725589	FALSE	9.28e-08	0.496165	0.165412	-671.491
MAP4K4	0.00270745	0.0274801	-0.317879	0.19066	FALSE	1.45e-07	-0.317879	0.10599	-1289.98
KCNK6	0.00271593	0.0275423	-0.604774	0.0602084	FALSE	2.3e-08	-0.604774	0.201714	-603.37
MED29	0.00272329	0.0275931	-0.340481	0.157082	FALSE	6e-07	-0.340481	0.113594	-1151.79
FRAS1	0.00273325	0.0276701	-0.739042	0.0347356	FALSE	4.08e-08	-0.739042	0.246656	-384.251
ATP5G3	0.00273907	0.0277051	-0.14075	1.13277	FALSE	1.18e-06	-0.14075	0.0469857	-3349.56
MAST2	0.00274803	0.0277716	-0.907091	0.0219992	FALSE	3.44e-08	-0.907091	0.302909	-257.752
RNF149	0.00275497	0.027807	-0.270103	0.268622	FALSE	6.41e-08	-0.270103	0.0902197	-1582.29
TNS3	0.00275627	0.027807	-0.662052	0.047858	FALSE	3.74e-08	-0.662052	0.221149	-477.68
ADAM33	0.0027626	0.0278469	0.803985	0.032034	FALSE	8.3e-08	0.803985	0.268623	-342.857
GATA6	0.00276901	0.0278875	-0.380203	0.140872	FALSE	2.19e-08	-0.380203	0.127061	-1068.43
LARP6	0.00277524	0.0279263	-0.278867	0.243921	FALSE	8.9e-08	-0.278867	0.0932167	-1439.86
RBM17	0.00280002	0.0281515	-0.215864	0.445774	FALSE	1.21e-07	-0.215864	0.0722225	-2208.4
TDRD3	0.00280909	0.0282184	-0.559866	0.0517175	FALSE	1.18e-07	-0.559866	0.187378	-517.003
GMPS	0.00286295	0.0287249	-0.366375	0.12775	FALSE	5.29e-07	-0.366375	0.122859	-953.345
GADD45GIP1	0.0028644	0.0287249	-0.164208	0.789657	FALSE	3.17e-07	-0.164208	0.0550677	-2968.32
FIBCD1	0.00287952	0.0287795	-1.19354	0.0154381	FALSE	1.94e-08	-1.19354	0.400474	-198.83
ARFGAP2	0.00287307	0.0287795	-0.424013	0.0976457	FALSE	1.36e-07	-0.424013	0.142238	-836.851
NFKB2	0.00287967	0.0287795	-0.343215	0.157082	FALSE	6.51e-08	-0.343215	0.115161	-1075.28
CRKL	0.0028772	0.0287795	-0.614169	0.0455423	FALSE	6e-08	-0.614169	0.206058	-477.366
AIG1	0.00288797	0.0288378	-0.246945	0.313393	FALSE	8.94e-07	-0.246945	0.0828838	-1804.79
FGFR1	0.00289276	0.0288552	-0.177599	0.755307	FALSE	3.56e-07	-0.177599	0.0596189	-2817.09
CTD-2020K17.1	0.00289463	0.0288552	-0.81436	0.0281745	FALSE	7.56e-08	-0.81436	0.273393	-324.626
ASCC3	0.00290439	0.0289279	-0.482496	0.0733308	FALSE	2.98e-07	-0.482496	0.162037	-654.523
ABCD3	0.00290791	0.0289383	-0.597618	0.047858	FALSE	6.36e-08	-0.597618	0.200724	-485.001
JAGN1	0.00293234	0.0291568	-0.296819	0.202624	FALSE	1.62e-07	-0.296819	0.0997798	-1368.07
SUCLG1	0.00299455	0.029739	-0.215752	0.397144	FALSE	5.99e-07	-0.215752	0.0726853	-1984.75
THAP9-AS1	0.00299597	0.029739	-0.467921	0.0787341	FALSE	2.09e-07	-0.467921	0.157647	-699.395
GGNBP2	0.00300171	0.0297708	-0.220934	0.411424	FALSE	1.46e-07	-0.220934	0.0744496	-2094.34
ATAD1	0.00300512	0.0297794	-0.358194	0.133539	FALSE	1.46e-07	-0.358194	0.120717	-1034.34
IVD	0.00303295	0.0300298	-0.541771	0.0567349	FALSE	2.18e-08	-0.541771	0.18276	-540.403
COPB2	0.00304339	0.0300393	-0.283874	0.228869	FALSE	2.02e-07	-0.283874	0.0957958	-1307.64
HFE	0.0030397	0.0300393	-1.27186	0.0119645	FALSE	3.46e-08	-1.27186	0.429148	-163.495
CHRDL2	0.00304416	0.0300393	-0.553726	0.0783481	FALSE	1.9e-07	-0.553726	0.186865	-705.354
MAPK1IP1L	0.00304007	0.0300393	-0.23851	0.350058	FALSE	9.41e-08	-0.23851	0.0804781	-1890.93
UNC5C	0.00304953	0.0300669	-0.551741	0.0575068	FALSE	1.03e-07	-0.551741	0.186229	-550.397
MPPE1	0.00305213	0.0300673	-0.527714	0.0617522	FALSE	6.68e-08	-0.527714	0.178135	-599.646
BIN1	0.00306465	0.0301479	-0.328664	0.165959	FALSE	3.07e-07	-0.328664	0.110991	-1100.76
RPL37A	0.00306802	0.0301479	0.0772779	8.64685	FALSE	2.7e-08	0.0772779	0.0261	-7607.98
FAM114A2	0.00306589	0.0301479	-0.409374	0.104593	FALSE	9.99e-08	-0.409374	0.138253	-882.321
FBXO42	0.00311816	0.0306012	-0.80535	0.0254728	FALSE	3.85e-08	-0.80535	0.27246	-301.832
INPP4B	0.00312199	0.0306012	0.745257	0.0385951	FALSE	4.24e-08	0.745257	0.252162	-411.406
BRIX1	0.00312069	0.0306012	-0.240225	0.335006	FALSE	4.91e-07	-0.240225	0.0812781	-1839.1
PDLIM7	0.00312777	0.0306323	0.207232	0.497105	FALSE	3.71e-08	0.207232	0.0701319	-2275.24
ATP8A2	0.00316062	0.0309282	-0.671958	0.0401389	FALSE	5.23e-08	-0.671958	0.227654	-445.347
UQCRFS1	0.0031914	0.0312033	-0.180205	0.594365	FALSE	2.61e-07	-0.180205	0.0611137	-2439.87
RCAN1	0.00319996	0.031261	-0.299696	0.270552	FALSE	4.65e-07	-0.299696	0.101666	-1648.55
MYCBP2	0.00321084	0.0313411	-0.248457	0.306831	FALSE	4.83e-07	-0.248457	0.0843143	-1770.8
EDNRA	0.00321449	0.0313507	-0.29914	0.24122	FALSE	4.13e-08	-0.29914	0.101526	-1580.92
ZNF462	0.00323093	0.0314587	-0.565731	0.0532613	FALSE	8.72e-08	-0.565731	0.192107	-520.995
TRAPPC4	0.00322966	0.0314587	-0.240451	0.306445	FALSE	1.14e-07	-0.240451	0.0816475	-1735.96
SRRM2	0.00324517	0.0315711	-0.158761	0.884215	FALSE	8.4e-08	-0.158761	0.0539359	-3149.65
TMTC3	0.00325865	0.031676	-0.44316	0.0930143	FALSE	5.2e-08	-0.44316	0.150621	-769.523
2007-03-01	0.00326313	0.0316932	-0.313365	0.195677	FALSE	2.86e-08	-0.313365	0.106522	-1295.47
PHF14	0.00326606	0.0316954	-0.255723	0.292165	FALSE	3.31e-07	-0.255723	0.0869358	-1766.78
ALPL	0.00327141	0.0317211	-0.755562	0.0494018	FALSE	2.18e-08	-0.755562	0.256905	-396.255
EMILIN1	0.00327873	0.0317658	-0.146531	1.10961	FALSE	3.64e-07	-0.146531	0.0498351	-3399.21
VWA5A	0.00328154	0.0317667	-0.389547	0.115399	FALSE	1.71e-07	-0.389547	0.132497	-921.047
RRAGC	0.00329383	0.0318169	-0.330084	0.160942	FALSE	4.46e-07	-0.330084	0.112316	-1147.04
TTC21B	0.00329946	0.0318169	-0.884605	0.0181397	FALSE	0.000358326	-0.884605	0.301053	0
PPP6C	0.00330029	0.0318169	0.357697	0.133153	FALSE	1.57e-07	0.357697	0.121737	-1033.65
FIBIN	0.00329069	0.0318169	-0.377186	0.158626	FALSE	3.5e-08	-0.377186	0.12833	-1206.43
RAB3IP	0.00329517	0.0318169	-0.793708	0.0258587	FALSE	3.37e-08	-0.793708	0.270082	-294.192
KLF3	0.00331435	0.0319262	-0.303912	0.196835	FALSE	5.49e-08	-0.303912	0.103478	-1274.61
HLA-DRA	0.0033291	0.0320419	0.502078	0.216519	FALSE	4.64e-08	0.502078	0.171031	-1073.32
KIAA1191	0.00333261	0.0320494	-0.402507	0.101505	FALSE	8.77e-08	-0.402507	0.137128	-824.789
GTF2I	0.0033381	0.0320739	-0.248069	0.297569	FALSE	1.76e-07	-0.248069	0.0845279	-1661.23
ZFAND5	0.00334063	0.0320739	-0.154902	1.00193	FALSE	1.92e-07	-0.154902	0.0527863	-3223
MLLT4	0.00334612	0.0321003	-0.405187	0.113856	FALSE	2.75e-07	-0.405187	0.1381	-971.181
NET1	0.00336183	0.0322246	0.651956	0.0459282	FALSE	5.32e-08	0.651956	0.222317	-453.894
TNFRSF1B	0.00338659	0.0324255	-0.47064	0.0810498	FALSE	2.32e-07	-0.47064	0.160613	-720.216
PTRH2	0.00338832	0.0324255	-0.299181	0.209186	FALSE	1.58e-07	-0.299181	0.102105	-1373.33
USP1	0.00341282	0.0326333	-0.389416	0.110768	FALSE	6.33e-08	-0.389416	0.133003	-912.962
TM6SF1	0.00347313	0.033183	-1.30028	0.0115785	FALSE	4.77e-08	-1.30028	0.444932	-167.847
FAM208A	0.00348574	0.0332411	-0.519496	0.0609803	FALSE	2.71e-07	-0.519496	0.17783	-591.455
CCNT1	0.00348526	0.0332411	-0.522313	0.0613663	FALSE	1.31e-07	-0.522313	0.178792	-599.495
MESDC2	0.00348772	0.0332411	-0.199419	0.487843	FALSE	2.96e-07	-0.199419	0.0682679	-2260.27
APOLD1	0.00349673	0.0332999	0.675077	0.0486299	FALSE	9.67e-08	0.675077	0.231165	-482.794
C2CD3	0.00350937	0.0333932	-1.03209	0.0138942	FALSE	5.35e-06	-1.03209	0.353553	-178.634
FAM120B	0.00351964	0.0334637	-0.759637	0.0250868	FALSE	2.37e-08	-0.759637	0.260303	-283.632
PLD1	0.00352858	0.0335063	-0.779841	0.0262447	FALSE	2.45e-08	-0.779841	0.267298	-300.767
RBAK	0.00352984	0.0335063	-1.03109	0.0138942	FALSE	0.0174797	-1.03109	0.35343	0
HIPK3	0.0035414	0.0335617	-0.297872	0.206098	FALSE	4.08e-07	-0.297872	0.102138	-1388.39
TLE3	0.0035387	0.0335617	-0.475763	0.0787341	FALSE	1.53e-07	-0.475763	0.163122	-711.42
PLEKHA4	0.00355166	0.0336318	0.260962	0.273254	FALSE	6.76e-07	0.260962	0.0895097	-1699.9
GUSB	0.00356594	0.0337397	-0.330991	0.153223	FALSE	5.7e-08	-0.330991	0.113579	-1117.47
SLC11A2	0.0035833	0.0338556	-0.57447	0.0505596	FALSE	5.97e-08	-0.57447	0.19723	-512.917
ARL6IP1	0.00358397	0.0338556	-0.198292	0.533385	FALSE	8.22e-08	-0.198292	0.0680801	-2454.79
FAM63B	0.00359341	0.0339175	0.324476	0.17638	FALSE	5.83e-08	0.324476	0.111434	-1211.23
HR	0.00359946	0.0339473	1.38491	0.0115785	FALSE	1.5e-08	1.38491	0.475706	-154.036
SARDH	0.00360531	0.0339751	-0.940966	0.0185257	FALSE	5.96e-09	-0.940966	0.323269	-217.539
MBNL2	0.00361974	0.0340837	-0.275954	0.242377	FALSE	2.91e-07	-0.275954	0.094845	-1497.07
SNW1	0.00363197	0.0341714	-0.234995	0.33076	FALSE	5.09e-07	-0.234995	0.0807967	-1866.57
ZW10	0.00364006	0.03422	-0.837741	0.0247009	FALSE	1.16e-08	-0.837741	0.288104	-293.346
MAD2L2	0.00364804	0.0342676	-0.276513	0.243921	FALSE	1.57e-07	-0.276513	0.0951165	-1577.71
RP11-379F4.7	0.0036751	0.034487	-1.0817	0.0154381	FALSE	7.24e-09	-1.0817	0.372384	-189.319
UTP23	0.00367728	0.034487	-0.356276	0.131609	FALSE	1.09e-07	-0.356276	0.122659	-1001.21
ZEB2	0.0036834	0.0344893	-0.197004	0.507526	FALSE	3.73e-07	-0.197004	0.0678372	-2398.41
ERLIN1	0.00368286	0.0344893	-0.558258	0.0505596	FALSE	1.81e-07	-0.558258	0.19223	-489.686
SGMS1	0.00369451	0.0345656	-0.386731	0.111154	FALSE	5.27e-08	-0.386731	0.133212	-894.159
FKBP9	0.00371291	0.0346846	-0.3278	0.1621	FALSE	2.57e-08	-0.3278	0.112973	-1092.62
SLC3A2	0.00371314	0.0346846	-0.15885	0.865303	FALSE	6.02e-07	-0.15885	0.0547464	-2985.04
POR	0.00372394	0.0347578	-0.265965	0.244307	FALSE	1.06e-07	-0.265965	0.0916916	-1536.43
WDR45	0.00373832	0.0348365	-0.258477	0.259359	FALSE	1.09e-07	-0.258477	0.0891474	-1606.24
STIP1	0.00373791	0.0348365	-0.278842	0.223466	FALSE	3.88e-07	-0.278842	0.0961698	-1397.95
IL11RA	0.00374995	0.0349171	-0.416963	0.104593	FALSE	2.7e-07	-0.416963	0.143856	-916.805
KMT2E-AS1	0.00375599	0.0349456	0.525987	0.0671555	FALSE	2.98e-07	0.525987	0.181503	-682.237
NR4A1	0.00376064	0.0349612	0.143767	1.47086	FALSE	1.33e-07	0.143767	0.0496164	-4089.66
C1RL	0.0037682	0.0350036	-0.338129	0.155924	FALSE	1.09e-07	-0.338129	0.116719	-1143.84
FAM53C	0.00377801	0.035067	-0.367209	0.132767	FALSE	2.03e-07	-0.367209	0.126793	-1026.12
PPFIBP1	0.00381752	0.0353777	-0.308052	0.193748	FALSE	3.58e-07	-0.308052	0.106487	-1336.69
UBB	0.00381615	0.0353777	0.0805585	6.34465	FALSE	4.07e-08	0.0805585	0.0278463	-6867.52
LINC00473	0.00382757	0.0354273	-0.853957	0.0281745	FALSE	1.57e-08	-0.853957	0.295279	-318.264
RP6-65G23.5	0.00382892	0.0354273	-0.776584	0.0312621	FALSE	2.79e-08	-0.776584	0.268536	-368.249
RP11-1391J7.1	0.00384104	0.0355114	-0.619951	0.0436125	FALSE	1.32e-07	-0.619951	0.214447	-472.729
AGO3	0.00385168	0.0355817	-0.3533	0.139714	FALSE	3.1e-07	-0.3533	0.122247	-1070.13
GPR68	0.00386403	0.0356397	0.963825	0.0208414	FALSE	2.81e-08	0.963825	0.333613	-236.433
TIMM21	0.00386107	0.0356397	-0.523018	0.0571208	FALSE	3.24e-07	-0.523018	0.181019	-562.608
ZCWPW1	0.00387333	0.0356974	-0.687135	0.0374373	FALSE	3.75e-08	-0.687135	0.237903	-422.904
TAX1BP1	0.00387909	0.0357224	-0.191716	0.509456	FALSE	3.14e-07	-0.191716	0.0663874	-2284.02
LACTB	0.00389135	0.0357791	-0.373088	0.124662	FALSE	1.09e-07	-0.373088	0.129238	-955.946
ADNP2	0.00388878	0.0357791	-0.610802	0.0405249	FALSE	1.58e-07	-0.610802	0.211566	-412.527
ATXN10	0.00392033	0.0360173	-0.269674	0.229641	FALSE	4.85e-07	-0.269674	0.0934905	-1397.52
CDC42EP1	0.00392457	0.0360279	-0.239306	0.33269	FALSE	4.21e-07	-0.239306	0.0829725	-1902.95
STK17A	0.00393071	0.0360562	-0.193128	0.56812	FALSE	8.24e-07	-0.193128	0.066973	-2483.79
CYTH1	0.00393559	0.0360727	-0.685567	0.0358935	FALSE	6.02e-08	-0.685567	0.237774	-401.685
MCAM	0.0039841	0.0364888	0.856879	0.0293323	FALSE	2.13e-08	0.856879	0.297588	-318.926
PCBD1	0.00399529	0.0365627	0.294024	0.199923	FALSE	4.79e-07	0.294024	0.102144	-1354.52
HECTD1	0.00400695	0.0366408	-0.344993	0.137399	FALSE	9.74e-08	-0.344993	0.119889	-1009.47
HSP90B1	0.00402732	0.0367984	-0.109494	2.3516	FALSE	6.7e-08	-0.109494	0.0380713	-4348.68
FAM160B1	0.00404726	0.0369517	-0.56525	0.0505596	FALSE	2.73e-08	-0.56525	0.196646	-505.028
IPO9	0.0040725	0.0371312	-0.485208	0.0656117	FALSE	2.72e-07	-0.485208	0.168915	-587.708
ZBED4	0.00407326	0.0371312	-1.05457	0.015824	FALSE	2.49e-08	-1.05457	0.367134	-206.829
ENO1	0.00412777	0.0375697	-0.121627	1.73832	FALSE	1.22e-07	-0.121627	0.042405	-4134.33
FRMD4A	0.00412734	0.0375697	-0.540526	0.0725589	FALSE	5.11e-08	-0.540526	0.188451	-649.46
PLAUR	0.00414222	0.037672	-0.184575	0.971054	FALSE	3.07e-07	-0.184575	0.0643763	-3291.5
KHDRBS3	0.00414806	0.0376959	0.846045	0.0247009	FALSE	1.73e-07	0.846045	0.295131	-303.372
ARF6	0.0041551	0.0377307	-0.178061	0.727518	FALSE	3.7e-07	-0.178061	0.0621257	-2933.79
TCEB3	0.00416576	0.0377663	-0.379809	0.118101	FALSE	1.49e-07	-0.379809	0.132553	-926.703
PAFAH1B2	0.00416837	0.0377663	-0.301793	0.184871	FALSE	4.67e-07	-0.301793	0.105333	-1276.69
ZNF808	0.0041687	0.0377663	-1.39174	0.0100347	FALSE	3.63e-08	-1.39174	0.485757	-145.98
NUP62	0.00418735	0.037906	-0.470467	0.0690853	FALSE	4.07e-08	-0.470467	0.164287	-618.702
RARA	0.00419314	0.0379292	-0.319092	0.17638	FALSE	3.23e-07	-0.319092	0.111444	-1270.59
OBSL1	0.00419698	0.0379346	-0.43818	0.0822076	FALSE	1.83e-07	-0.43818	0.153051	-741.792
RBPMS	0.0042146	0.0380517	0.257013	0.26785	FALSE	2.65e-07	0.257013	0.0898132	-1596.05
NTM	0.00421643	0.0380517	0.442088	0.110768	FALSE	3.81e-09	0.442088	0.154495	-826.243
PON3	0.00422906	0.0381071	-1.09978	0.0131223	FALSE	6.96e-08	-1.09978	0.384464	-173.072
ADAMTSL2	0.00422707	0.0381071	-0.391694	0.111154	FALSE	9.12e-08	-0.391694	0.136922	-898.107
SRSF1	0.00423508	0.038132	-0.254387	0.272868	FALSE	4.13e-07	-0.254387	0.0889433	-1628.58
NFATC1	0.00424271	0.0381714	-0.22863	0.488614	FALSE	2.74e-07	-0.22863	0.0799538	-2201.8
MED13L	0.00426528	0.038345	-0.36124	0.128522	FALSE	5.58e-07	-0.36124	0.126403	-1011.57
PPP6R3	0.00429222	0.0385576	-0.524485	0.0578927	FALSE	2.5e-08	-0.524485	0.183653	-552.641
ATL3	0.0043005	0.0386024	-0.324097	0.152451	FALSE	4.12e-07	-0.324097	0.11351	-1060.49
PSMB5	0.00430751	0.0386358	-0.147339	0.854882	FALSE	2.01e-07	-0.147339	0.0516126	-2920.62
USP47	0.00432015	0.03869	-0.271301	0.240062	FALSE	2.13e-07	-0.271301	0.095067	-1480.44
SRSF2	0.00431738	0.03869	-0.15212	1.01312	FALSE	4.1e-07	-0.15212	0.0533007	-3398.14
C8orf4	0.00433032	0.0387219	-0.166142	1.62949	FALSE	8.56e-08	-0.166142	0.0582333	-4098.3
LSP1	0.00432907	0.0387219	1.0586	0.0208414	FALSE	3.52e-08	1.0586	0.371029	-240.67
LRRFIP1	0.00433804	0.0387318	-0.218685	0.495562	FALSE	9.43e-08	-0.218685	0.0766649	-2276.61
ICAM4	0.00433694	0.0387318	-0.579513	0.0567349	FALSE	8.06e-09	-0.579513	0.203156	-543.972
HNRNPH3	0.0043713	0.0389694	-0.172236	0.654188	FALSE	1.05e-07	-0.172236	0.0604328	-2652.73
LEMD3	0.00437117	0.0389694	-0.558655	0.0497877	FALSE	1.64e-07	-0.558655	0.196016	-509.832
IZUMO4	0.00437837	0.0390028	-1.62215	0.00810498	FALSE	1.89e-08	-1.62215	0.569269	-123.754
TADA3	0.00438492	0.0390315	-0.278237	0.209572	FALSE	9.18e-08	-0.278237	0.0976594	-1345.06
SLC19A2	0.00439188	0.0390637	-0.363297	0.139714	FALSE	7.97e-08	-0.363297	0.127537	-1064.97
VAMP4	0.0044141	0.0392316	-0.447978	0.0825936	FALSE	1.75e-07	-0.447978	0.157354	-750.79
ANKRD53	0.00447766	0.0397664	-0.698895	0.0358935	FALSE	1.85e-07	-0.698895	0.245883	-401.546
RP11-553L6.5	0.00448486	0.0398002	-0.331048	0.154766	FALSE	1.33e-07	-0.331048	0.116489	-1160.1
TNFSF10	0.00450094	0.0399127	0.591368	0.0517175	FALSE	3.41e-08	0.591368	0.208174	-511.987
TPTEP1	0.00452941	0.0401347	0.979352	0.0192976	FALSE	9.93e-09	0.979352	0.344997	-220.524
USP34	0.00454354	0.0401992	-0.326422	0.155924	FALSE	9.99e-08	-0.326422	0.115029	-1151.57
RPL41	0.00454092	0.0401992	0.0610973	19.254	FALSE	1.07e-06	0.0610973	0.0215289	-9261.35
CTD-3252C9.4	0.00455457	0.0402664	-0.231105	0.458896	FALSE	5.7e-08	-0.231105	0.0814622	-2272.52
PLA2G12A	0.00456218	0.0403033	-0.354573	0.120417	FALSE	1.48e-07	-0.354573	0.125007	-909.5
NAGA	0.00457041	0.0403455	-0.47579	0.0698572	FALSE	6.27e-08	-0.47579	0.167777	-656.709
PLAU	0.00458242	0.0404212	0.395742	0.20494	FALSE	9.81e-09	0.395742	0.139591	-1276.35
SERPINE1	0.00461157	0.0406477	0.224744	1.81706	FALSE	2.46e-09	0.224744	0.0793312	-4118.77
NR4A2	0.00463389	0.0407831	0.25737	0.36897	FALSE	6.62e-09	0.25737	0.0908972	-1859.16
MRPS22	0.00463327	0.0407831	-0.371459	0.109224	FALSE	8.23e-08	-0.371459	0.131189	-874.215
GNL3	0.00463828	0.0407911	-0.176646	0.710922	FALSE	1.64e-07	-0.176646	0.062394	-2737.81
ACTN1	0.0046573	0.0409277	-0.170521	0.693169	FALSE	4.8e-07	-0.170521	0.0602584	-2653.99
A4GALT	0.00470254	0.0412943	-0.285498	0.210343	FALSE	1.78e-07	-0.285498	0.100999	-1386.35
SH3YL1	0.00473178	0.04152	-0.471995	0.0690853	FALSE	1.23e-07	-0.471995	0.167093	-651.06
LAMTOR5	0.00476511	0.0417685	-0.134035	1.08877	FALSE	1.57e-07	-0.134035	0.047488	-3402.67
TPGS2	0.00476723	0.0417685	-0.249443	0.276727	FALSE	1.77e-07	-0.249443	0.0883811	-1613.71
TEX2	0.00477348	0.0417921	-0.713833	0.0347356	FALSE	1.33e-08	-0.713833	0.252959	-380.341
PAPD7	0.00482141	0.0421801	-0.693925	0.0312621	FALSE	1.01e-07	-0.693925	0.246184	-346.857
EIF2D	0.00483889	0.0423015	-0.44368	0.0729448	FALSE	2.68e-07	-0.44368	0.157469	-655.524
SHF	0.00487187	0.0425581	0.87733	0.0216133	FALSE	1.18e-07	0.87733	0.31162	-255.048
GGCX	0.00490137	0.0427839	-0.397138	0.0972597	FALSE	4.37e-08	-0.397138	0.141157	-812.82
PBX2	0.00491696	0.0428139	-0.499034	0.0590506	FALSE	7.21e-08	-0.499034	0.177439	-573.683
SERPINA3-1	0.00491448	0.0428139	-1.38884	0.00964878	FALSE	1.21e-08	-1.38884	0.493795	-137.733
PSMC3IP	0.00491032	0.0428139	-1.08062	0.0119645	FALSE	0.0181364	-1.08062	0.384173	0
PITPNC1	0.00491942	0.0428139	0.560133	0.0571208	FALSE	6.99e-08	0.560133	0.199175	-572.548
AKIRIN2	0.00492868	0.0428494	-0.312356	0.168275	FALSE	9.66e-08	-0.312356	0.111093	-1236.4
UST	0.00493447	0.0428494	-0.969767	0.0169819	FALSE	2.9e-08	-0.969767	0.344956	-224.311
SH3KBP1	0.00493118	0.0428494	-0.271031	0.231957	FALSE	3.58e-07	-0.271031	0.0964009	-1481.08
RP11-395B7.4	0.00495005	0.0429529	0.806182	0.0250868	FALSE	1.39e-07	0.806182	0.28687	-308.927
MAN2B2	0.00501252	0.0434628	-0.527226	0.0563489	FALSE	4.35e-08	-0.527226	0.187877	-557.968
CD24	0.00502891	0.0435727	0.728768	0.0494018	FALSE	1.37e-08	0.728768	0.259794	-479.002
GEM	0.00504669	0.0436945	0.149227	1.5743	FALSE	3.28e-08	0.149227	0.0532187	-4135.94
ADGRE2	0.00509426	0.0440738	-0.88006	0.0258587	FALSE	3.79e-08	-0.88006	0.314194	-297.091
LGALS9	0.00510103	0.0440999	0.766671	0.0301042	FALSE	6.9e-09	0.766671	0.273754	-326.526
FAH	0.00511342	0.0441744	-0.443105	0.0779622	FALSE	8.84e-08	-0.443105	0.158263	-677.257
OXSR1	0.00517197	0.044645	-0.532791	0.0505596	FALSE	3.49e-07	-0.532791	0.190546	-499.461
MICAL3	0.00517551	0.044645	-0.631662	0.0358935	FALSE	1.07e-07	-0.631662	0.225924	-381.601
CAB39	0.00518652	0.044707	-0.371699	0.115014	FALSE	4.8e-07	-0.371699	0.132977	-946.04
TEFM	0.00521923	0.044956	-0.604292	0.0405249	FALSE	1.74e-07	-0.604292	0.216345	-444.126
GPX4	0.00523164	0.0450297	-0.113113	1.89502	FALSE	2.29e-07	-0.113113	0.0405072	-4478.7
EMC3	0.00524986	0.0451203	-0.218768	0.3489	FALSE	5.38e-07	-0.218768	0.0783753	-1860.77
PTN	0.00524875	0.0451203	0.392279	0.191432	FALSE	5.68e-08	0.392279	0.140533	-1327.05
SFI1	0.00526543	0.045221	-1.02187	0.015824	FALSE	5.46e-08	-1.02187	0.366218	-218.693
CEP85L	0.00527723	0.0452891	-0.409695	0.09533	FALSE	9.83e-08	-0.409695	0.146865	-821.913
TUBA1A	0.00529152	0.0453786	0.123301	2.74103	FALSE	2.91e-08	0.123301	0.0442139	-5201.97
FGD5-AS1	0.00529797	0.0454007	-0.294394	0.175994	FALSE	7.29e-08	-0.294394	0.10558	-1238.11
WIPI2	0.00530567	0.0454334	-0.292645	0.187958	FALSE	1.59e-07	-0.292645	0.104971	-1253
AZGP1	0.00531736	0.0455003	-1.62746	0.0100347	FALSE	7.17e-09	-1.62746	0.583914	-124.677
MTG2	0.00532785	0.0455568	-0.513188	0.055191	FALSE	5.33e-08	-0.513188	0.184168	-525.299
TMEM254	0.00533592	0.0455926	-0.861219	0.0208414	FALSE	5.77e-08	-0.861219	0.309121	-257.389
SH3D19	0.00534997	0.0456793	-0.253783	0.270552	FALSE	2.96e-07	-0.253783	0.0911195	-1566.58
DLG1	0.00537351	0.0458469	-0.441551	0.0775762	FALSE	1.1e-07	-0.441551	0.158618	-718.296
GAS7	0.00538836	0.0459402	-0.232677	0.330374	FALSE	3.57e-07	-0.232677	0.0836109	-1707.15
RPL7A	0.00540917	0.0460561	0.0709802	7.25975	FALSE	9.37e-08	0.0709802	0.0255178	-6713.81
PPHLN1	0.00541765	0.0460561	-0.263084	0.225782	FALSE	6.22e-07	-0.263084	0.0945972	-1425.85
EXOC3L4	0.00541453	0.0460561	-0.786662	0.0247009	FALSE	1e-07	-0.786662	0.282842	-286.962
LRRC8E	0.00541768	0.0460561	-0.899428	0.0154381	FALSE	0.0129827	-0.899428	0.323408	-94.6459
ACAT1	0.00544062	0.0461842	-0.259921	0.240448	FALSE	8.19e-07	-0.259921	0.0935063	-1526.71
C14orf132	0.00543688	0.0461842	-0.352005	0.12968	FALSE	2.47e-08	-0.352005	0.126623	-963.738
ZSWIM6	0.00545622	0.0462831	-0.3595	0.126206	FALSE	5.41e-08	-0.3595	0.129373	-1018.55
MAFK	0.00546066	0.0462873	-0.364053	0.118873	FALSE	2.6e-07	-0.364053	0.131024	-927.877
SMPD2	0.00546822	0.0463179	-0.730872	0.0266306	FALSE	7.28e-08	-0.730872	0.263086	-287.668
EVI5	0.00550593	0.0466036	-0.299171	0.183713	FALSE	3.51e-07	-0.299171	0.107777	-1256.66
ERVK3-1	0.00551619	0.0466568	-0.471523	0.0725589	FALSE	5.29e-08	-0.471523	0.169904	-696.333
B3GALT6	0.00552238	0.0466755	-0.643306	0.0374373	FALSE	2.93e-07	-0.643306	0.231833	-426.443
ELF1	0.00553509	0.0467492	-0.230719	0.321497	FALSE	5.9e-07	-0.230719	0.0831681	-1858.48
SLC7A2	0.00556622	0.0469782	0.497204	0.0737167	FALSE	1.3e-07	0.497204	0.179347	-680.213
RP11-382A20.3	0.00557575	0.0470248	0.340061	0.135855	FALSE	4.76e-07	0.340061	0.122689	-1056
KIAA0556	0.00558287	0.0470511	-1.58774	0.00771903	FALSE	2.01e-08	-1.58774	0.572916	-115.737
TNIP1	0.00559798	0.0470854	-0.273731	0.233501	FALSE	2.4e-08	-0.273731	0.0988039	-1437.22
CLN8	0.00559509	0.0470854	-0.37741	0.10961	FALSE	2.97e-07	-0.37741	0.136219	-876.714
SMCO3	0.005599	0.0470854	-0.995831	0.0181397	FALSE	5.12e-08	-0.995831	0.359456	-234.443
ETFA	0.00562101	0.0472366	-0.251209	0.252412	FALSE	1.37e-07	-0.251209	0.0907184	-1492
MRPS5	0.0056272	0.0472547	-0.226382	0.324585	FALSE	5.55e-07	-0.226382	0.0817632	-1853.94
RPS7	0.00567019	0.0475477	0.0777219	4.82941	FALSE	6.75e-07	0.0777219	0.0280963	-6013.98
ZNF638	0.00566785	0.0475477	-0.302509	0.170205	FALSE	5.22e-07	-0.302509	0.109351	-1200.78
SPATA6	0.00571189	0.0477266	-0.613661	0.0401389	FALSE	2.7e-08	-0.613661	0.222029	-429.464
SMC6	0.00570568	0.0477266	0.541525	0.0540332	FALSE	2.25e-07	0.541525	0.195904	-537.476
CASD1	0.00571058	0.0477266	-0.656777	0.0347356	FALSE	6.2e-08	-0.656777	0.237622	-395.179
ASNS	0.00570541	0.0477266	-0.488151	0.063682	FALSE	2.78e-07	-0.488151	0.176594	-592.24
TCTN3	0.00570527	0.0477266	-0.303821	0.166731	FALSE	2.83e-07	-0.303821	0.10991	-1135.32
ZFHX3	0.00572863	0.0478325	-0.264743	0.243535	FALSE	1.92e-07	-0.264743	0.0958197	-1527.52
GRPEL1	0.00574931	0.0479607	-0.24129	0.288306	FALSE	1.21e-07	-0.24129	0.0873686	-1657.16
FKBP2	0.00575217	0.0479607	-0.12941	1.24932	FALSE	8.39e-07	-0.12941	0.0468606	-3703.02
C9orf16	0.00576771	0.048056	0.188445	0.488228	FALSE	8.54e-08	0.188445	0.0682597	-2201.67
FAM188A	0.00577815	0.0481089	-0.567968	0.0436125	FALSE	4.48e-08	-0.567968	0.205777	-439.485
PGM3	0.00579093	0.0481811	-0.235537	0.314164	FALSE	1.05e-07	-0.235537	0.0853583	-1651.74
ECM1	0.00581979	0.0483868	0.189632	0.558086	FALSE	2.42e-07	0.189632	0.0687628	-2440.39
CTD-3138B18.5	0.00583115	0.0484469	-0.559452	0.0482439	FALSE	3.02e-08	-0.559452	0.202911	-502.079
USP2	0.00583811	0.0484703	-0.544155	0.0486299	FALSE	5e-08	-0.544155	0.197391	-472.092
ATP6AP2	0.00585575	0.0485824	-0.149735	0.832883	FALSE	1e-07	-0.149735	0.0543356	-3089
SNX4	0.0058743	0.0486675	-0.353608	0.119645	FALSE	3.84e-07	-0.353608	0.128365	-942.015
TCEA1	0.0058711	0.0486675	-0.212735	0.36897	FALSE	3.74e-07	-0.212735	0.0772207	-1996.25
FAM134C	0.00589721	0.0488227	-0.523661	0.0521034	FALSE	6e-08	-0.523661	0.190184	-534.325
CDC40	0.00591024	0.0488961	-0.275263	0.196835	FALSE	8.87e-08	-0.275263	0.0999968	-1301.1
DNAJC11	0.00592715	0.0489669	-0.91849	0.0150521	FALSE	0.0385515	-0.91849	0.33378	0
HSPA4	0.0059247	0.0489669	-0.3188	0.150907	FALSE	4.52e-08	-0.3188	0.115846	-1049.44
CCNDBP1	0.00594415	0.0490727	-0.31282	0.159012	FALSE	7.21e-08	-0.31282	0.113718	-1164.77
LRRC28	0.00597711	0.0493101	-0.722549	0.0266306	FALSE	7.02e-08	-0.722549	0.262838	-308.089
TPRG1	0.00600244	0.0494182	-0.617147	0.0389811	FALSE	5.07e-08	-0.617147	0.224609	-424.546
ZDHHC1	0.00600286	0.0494182	-0.466183	0.0494018	FALSE	0.00804287	-0.466183	0.169668	0
TMEM97	0.00599561	0.0494182	-0.656808	0.0351216	FALSE	2.47e-07	-0.656808	0.239011	-398.98
ZC3H15	0.00602432	0.0495601	-0.162597	0.680046	FALSE	1.58e-07	-0.162597	0.0592026	-2707.93
TTC39C	0.0060328	0.0495951	-0.351122	0.124276	FALSE	3.41e-07	-0.351122	0.127867	-969.663
FBXO28	0.00604758	0.0496817	-0.597875	0.0405249	FALSE	9.06e-08	-0.597875	0.21779	-428.654
SDK1	0.00605466	0.0497051	-0.484034	0.0648398	FALSE	4.86e-08	-0.484034	0.176345	-597.562
REV3L	0.00609137	0.0499714	-0.273329	0.243535	FALSE	1.8e-07	-0.273329	0.0996526	-1467.67
BROX	0.00611132	0.0501	-0.468682	0.0694712	FALSE	1.17e-07	-0.468682	0.170943	-675.113
PLK2	0.00611893	0.0501274	-0.2439	0.421845	FALSE	6.31e-09	-0.2439	0.0889711	-1937.01
EIF4A3	0.00612562	0.0501471	-0.169165	0.764184	FALSE	9.68e-08	-0.169165	0.0617168	-2892.97
ID3	0.00614204	0.0502464	0.176162	0.99614	FALSE	1.78e-08	0.176162	0.0642905	-3574.92
CMTM6	0.00614731	0.0502545	-0.200342	0.440756	FALSE	9.93e-08	-0.200342	0.0731225	-2204.96
ACP5	0.00615327	0.0502681	0.35023	0.157854	FALSE	1.69e-07	0.35023	0.127845	-1189.56
AFF4	0.00617033	0.0503374	-0.200191	0.412196	FALSE	2.93e-07	-0.200191	0.0731001	-2045.91
SAMD4A	0.00616938	0.0503374	-0.277046	0.229641	FALSE	4.85e-07	-0.277046	0.101162	-1474.36
IVNS1ABP	0.00619292	0.0504157	-0.319333	0.146276	FALSE	2.32e-07	-0.319333	0.116656	-1063.18
STARD7	0.00618947	0.0504157	-0.346332	0.123118	FALSE	1.94e-07	-0.346332	0.126511	-972.456
GDI1	0.00619714	0.0504157	0.284386	0.188344	FALSE	9.5e-08	0.284386	0.103898	-1282.46
PCMTD2	0.00619525	0.0504157	-0.520271	0.0532613	FALSE	1.51e-07	-0.520271	0.19007	-552.248
LAMA5	0.00621131	0.050461	0.98918	0.0177538	FALSE	8.33e-08	0.98918	0.361488	-238.251
U2AF1L4	0.00621002	0.050461	-0.415352	0.0910845	FALSE	1.56e-07	-0.415352	0.151783	-843.518
MRS2	0.00622717	0.0505548	-0.59967	0.039753	FALSE	1.22e-07	-0.59967	0.219212	-434.202
PODXL2	0.0062352	0.0505849	0.89343	0.0196835	FALSE	1.61e-07	0.89343	0.326647	-258.479
FADD	0.00624916	0.0506363	-0.454132	0.0741027	FALSE	4.16e-08	-0.454132	0.16608	-690.643
CTD-2012K14.8	0.00625017	0.0506363	1.51359	0.00849093	FALSE	2.65e-08	1.51359	0.553545	-128.891
BET1L	0.00627895	0.0508099	0.545463	0.0490158	FALSE	2.49e-08	0.545463	0.199595	-491.775
PPFIA1	0.00628027	0.0508099	-0.405851	0.0887688	FALSE	8.72e-08	-0.405851	0.148512	-747.566
DNAJB6	0.00630362	0.0509637	-0.163792	0.650714	FALSE	1.4e-07	-0.163792	0.059963	-2681.3
NQO2	0.00631644	0.0510024	-0.294972	0.179467	FALSE	7.67e-07	-0.294972	0.108013	-1288.46
MCM4	0.00631711	0.0510024	-1.24036	0.0119645	FALSE	4.97e-08	-1.24036	0.454203	-163.558
MAP4K3	0.00632422	0.0510247	-0.559441	0.0447704	FALSE	6.2e-08	-0.559441	0.204887	-478.841
GFM2	0.00636252	0.0512658	-0.901387	0.0185257	FALSE	9.75e-08	-0.901387	0.330361	-229.233
EGFL6	0.00636285	0.0512658	0.24833	0.496333	FALSE	1.57e-08	0.24833	0.0910142	-2376.79
GLUL	0.00637062	0.0512931	-0.169816	0.815901	FALSE	9.38e-08	-0.169816	0.0622475	-3142.85
PGRMC2	0.00642408	0.0516224	-0.21108	0.376303	FALSE	6e-08	-0.21108	0.0774518	-1977.44
GABPB1	0.00642473	0.0516224	-0.237357	0.286376	FALSE	4.13e-07	-0.237357	0.0870947	-1681.8
JUP	0.00641594	0.0516224	-0.462875	0.0690853	FALSE	1.36e-07	-0.462875	0.169817	-660.199
RRN3	0.00644418	0.0517432	-0.465428	0.0659977	FALSE	2.27e-07	-0.465428	0.170844	-638.475
SUN2	0.00645102	0.0517627	-0.317672	0.149749	FALSE	1.9e-07	-0.317672	0.116623	-1137.56
GCNT1	0.00645764	0.0517804	1.08585	0.0146662	FALSE	8.98e-08	1.08585	0.398683	-188.071
RAPGEF6	0.00649494	0.0520083	-0.711531	0.0277885	FALSE	3.55e-08	-0.711531	0.26143	-322.436
JAK2	0.00649297	0.0520083	-0.77678	0.023543	FALSE	7.01e-08	-0.77678	0.285393	-270.005
PTGIR	0.00650343	0.0520407	-0.23434	0.379004	FALSE	4.88e-08	-0.23434	0.0861147	-2151.96
TSPYL1	0.00656005	0.052458	-0.236188	0.321112	FALSE	6.33e-08	-0.236188	0.0868852	-1823.12
FENDRR	0.00657062	0.0525067	0.978195	0.0173678	FALSE	3.46e-08	0.978195	0.359914	-222.582
CD34	0.00664855	0.0530571	0.543442	0.0578927	FALSE	1.51e-08	0.543442	0.20024	-525.578
CCK	0.00664417	0.0530571	-1.30851	0.0270166	FALSE	5.06e-09	-1.30851	0.482102	-205.803
SLC16A1	0.00666097	0.0531201	-0.282387	0.193748	FALSE	1.04e-07	-0.282387	0.104074	-1266.59
SETD3	0.00669429	0.0533495	-0.429072	0.0787341	FALSE	3.92e-08	-0.429072	0.158231	-710.066
MFSD14A	0.00673236	0.0535891	-0.344896	0.116557	FALSE	5.95e-07	-0.344896	0.127277	-938.814
SRP68	0.00673349	0.0535891	-0.335518	0.12968	FALSE	6.78e-08	-0.335518	0.123819	-993.312
FAM19A5	0.00677633	0.0538934	0.783075	0.0254728	FALSE	7.58e-08	0.783075	0.289209	-282.796
PRRX1	0.00679523	0.0540071	0.172269	0.649556	FALSE	8.79e-07	0.172269	0.0636452	-2701.63
TSC22D2	0.00680841	0.0540752	-0.271443	0.22501	FALSE	1.1e-07	-0.271443	0.100309	-1450.46
CRYBG3	0.00687209	0.054544	-0.452717	0.071787	FALSE	2.3e-07	-0.452717	0.167488	-662.318
APIP	0.00689038	0.0546522	-0.445791	0.0721729	FALSE	9.62e-08	-0.445791	0.16498	-681.197
TSPAN13	0.00689628	0.054662	-0.302431	0.197221	FALSE	1.51e-07	-0.302431	0.111936	-1333.1
B3GLCT	0.00690509	0.0546948	-0.770263	0.0250868	FALSE	1.15e-07	-0.770263	0.285136	-309.922
ZNF622	0.00694283	0.0549567	-0.275375	0.196449	FALSE	3.22e-07	-0.275375	0.102007	-1296.07
TOB1	0.00697299	0.0551581	-0.292844	0.182169	FALSE	1.88e-07	-0.292844	0.108536	-1291.52
SUMF2	0.00699039	0.0551841	-0.229632	0.30027	FALSE	1.72e-07	-0.229632	0.0851338	-1719.08
KCNQ1OT1	0.00698604	0.0551841	-0.214437	0.649556	FALSE	1.61e-08	-0.214437	0.0794945	-2488.4
DCHS1	0.0069834	0.0551841	0.647876	0.0355075	FALSE	1.75e-08	0.647876	0.240165	-366.862
SYF2	0.00701264	0.0553224	0.184806	0.52335	FALSE	1.88e-07	0.184806	0.0685419	-2571.39
MED28	0.00702397	0.0553373	-0.24236	0.259359	FALSE	3.21e-07	-0.24236	0.0899059	-1558.96
KAT6A	0.00702323	0.0553373	-0.364572	0.10768	FALSE	5.18e-08	-0.364572	0.13524	-862.954
MANBA	0.00703231	0.0553658	-0.533089	0.0505596	FALSE	8.91e-08	-0.533089	0.197784	-515.638
HLA-DPB1	0.00704505	0.0553918	0.352601	0.169433	FALSE	3.11e-08	0.352601	0.130849	-1166.4
GLO1	0.00704309	0.0553918	-0.229683	0.290621	FALSE	1.11e-06	-0.229683	0.0852321	-1711.81
MEF2A	0.0070574	0.0554516	-0.322886	0.144732	FALSE	5.2e-07	-0.322886	0.119848	-1105.11
RP11-95H3.1	0.00711217	0.0558446	-1.02992	0.0150521	FALSE	2.56e-08	-1.02992	0.382649	-196.721
PRRT2	0.00712367	0.0558974	0.709643	0.0297183	FALSE	1.08e-07	0.709643	0.263709	-368.834
FAM127A	0.00712914	0.0559029	-0.171444	0.595137	FALSE	2.44e-07	-0.171444	0.0637159	-2603.14
PSTPIP1	0.00718363	0.0562926	1.04694	0.015824	FALSE	1.26e-08	1.04694	0.389458	-195.48
TM2D2	0.00723476	0.0566554	-0.218674	0.345426	FALSE	4.2e-08	-0.218674	0.0814172	-1840.47
HTR2B	0.0072425	0.0566781	1.02947	0.0181397	FALSE	6.97e-08	1.02947	0.383345	-225.407
MRPL36	0.00725502	0.0567382	-0.215594	0.338093	FALSE	5.53e-07	-0.215594	0.0802984	-1876.92
NHSL2	0.00727091	0.0567748	-0.520419	0.0559629	FALSE	1.67e-07	-0.520419	0.193884	-537.297
L3HYPDH	0.00727837	0.0567748	-0.410778	0.0802779	FALSE	4.19e-08	-0.410778	0.153057	-650.797
GJC1	0.00726922	0.0567748	0.861836	0.0223852	FALSE	8.44e-08	0.861836	0.321071	-277.925
SCARF2	0.00727907	0.0567748	-0.336486	0.132381	FALSE	5.42e-07	-0.336486	0.125377	-1046.47
HIVEP2	0.00730601	0.0569092	-0.35365	0.11347	FALSE	5.96e-08	-0.35365	0.131833	-906.784
MAFF	0.00730321	0.0569092	-0.180839	0.615592	FALSE	2.33e-07	-0.180839	0.0674094	-2585.7
RPA2	0.00731452	0.0569298	-0.292943	0.182169	FALSE	3.49e-07	-0.292943	0.109219	-1309.98
U2AF1	0.00731837	0.0569298	-0.364386	0.102663	FALSE	1.37e-07	-0.364386	0.135864	-835.668
NAA50	0.00732437	0.0569387	-0.231959	0.287148	FALSE	2.01e-07	-0.231959	0.0864963	-1652.64
LRRC41	0.00735252	0.0571196	-0.276075	0.201853	FALSE	2.26e-07	-0.276075	0.102996	-1333.19
SEC22A	0.00737292	0.0571479	-0.435476	0.0752605	FALSE	1.95e-07	-0.435476	0.162521	-709.248
NOM1	0.00737516	0.0571479	-0.425294	0.0764184	FALSE	4.96e-08	-0.425294	0.158727	-686.44
ZHX1-C8orf76	0.00737566	0.0571479	-1.43095	0.00810498	FALSE	1.72e-08	-1.43095	0.534058	-118.24
DRAM1	0.00737167	0.0571479	-0.321851	0.134697	FALSE	2.32e-07	-0.321851	0.120113	-956.132
NHLRC3	0.00739572	0.0572656	-0.380395	0.0976457	FALSE	2.61e-07	-0.380395	0.142019	-869.035
ARL4C	0.00740907	0.0573311	0.44145	0.0879969	FALSE	1.97e-07	0.44145	0.164851	-752.776
BCL7A	0.00742649	0.0574279	0.67133	0.0331918	FALSE	5.55e-08	0.67133	0.250768	-379.851
LINC00311	0.00744015	0.0574957	-0.761714	0.0243149	FALSE	1.43e-07	-0.761714	0.284596	-294.212
EIF2AK4	0.00745729	0.0575901	-0.396892	0.0895407	FALSE	1.57e-07	-0.396892	0.148332	-752.442
LYPLA1	0.00747198	0.0576656	-0.341402	0.122733	FALSE	4.38e-07	-0.341402	0.127625	-954.73
MRPL53	0.00747733	0.0576689	-0.569296	0.0428406	FALSE	1.25e-07	-0.569296	0.212837	-464.361
ZNF768	0.00751894	0.0579517	-0.76314	0.0227711	FALSE	3.39e-08	-0.76314	0.285506	-276.373
EIF3I	0.00752723	0.0579775	-0.147323	0.776534	FALSE	5.84e-08	-0.147323	0.0551242	-2830.44
SYNDIG1	0.00754599	0.0580838	1.27399	0.0111926	FALSE	1.81e-08	1.27399	0.47684	-148.607
KIFC2	0.00756169	0.0581664	-1.32067	0.00887688	FALSE	1.69e-08	-1.32067	0.494442	-128.368
ERGIC3	0.00757513	0.0582317	-0.149247	0.73408	FALSE	4.67e-07	-0.149247	0.0558885	-2797.11
KDM1A	0.00761348	0.0584501	-0.432501	0.0744886	FALSE	2.85e-07	-0.432501	0.162062	-659.688
ORMDL2	0.00761352	0.0584501	-0.303549	0.155924	FALSE	5.77e-07	-0.303549	0.113742	-1127.65
RUSC2	0.00762674	0.0585133	-0.712566	0.0243149	FALSE	1.94e-07	-0.712566	0.267062	-282.865
TSPAN6	0.0076386	0.058566	-0.332451	0.135469	FALSE	6.87e-08	-0.332451	0.124624	-1094.59
GOT1	0.00764667	0.0585895	-0.506978	0.0513315	FALSE	9.26e-08	-0.506978	0.190073	-503.696
ADRA2A	0.00766006	0.0586538	0.667704	0.0420687	FALSE	1.36e-08	0.667704	0.250386	-456.61
TRAK1	0.00767947	0.058764	-0.550909	0.0497877	FALSE	1.5e-07	-0.550909	0.206655	-510.867
CHST12	0.00771043	0.0589516	-0.334537	0.120417	FALSE	1.63e-07	-0.334537	0.125554	-959.243
NUTM2B-AS1	0.00771405	0.0589516	-0.34023	0.126206	FALSE	1.3e-07	-0.34023	0.127698	-966.905
WDR61	0.00776198	0.0592793	-0.218539	0.29834	FALSE	5.72e-07	-0.218539	0.082088	-1631.42
ADGRG2	0.00776778	0.059285	-1.27708	0.0100347	FALSE	1.66e-08	-1.27708	0.479743	-138.572
GCA	0.00778229	0.0593571	-0.514248	0.0559629	FALSE	1.77e-07	-0.514248	0.193227	-593.243
MTR	0.00781843	0.059594	-0.487485	0.0548051	FALSE	2.15e-07	-0.487485	0.183278	-529.278
TRIM8	0.00789684	0.0601525	-0.366981	0.104979	FALSE	8.47e-08	-0.366981	0.138147	-888.169
TLN1	0.00795172	0.0605312	-0.196112	0.419143	FALSE	3.35e-07	-0.196112	0.07389	-2139.1
ETV2	0.00797332	0.0606562	-1.01322	0.015824	FALSE	8.02e-08	-1.01322	0.381888	-209.152
ARPC5	0.00799521	0.0607833	-0.145772	0.848707	FALSE	9.17e-07	-0.145772	0.0549612	-3092.41
TMEM2	0.00800516	0.0608195	-0.415883	0.0822076	FALSE	5.58e-08	-0.415883	0.156827	-739.449
GOLGA4	0.00814136	0.061665	-0.198289	0.399846	FALSE	1.75e-07	-0.198289	0.0749349	-1838.62
C6orf62	0.00814275	0.061665	-0.257097	0.222694	FALSE	6.4e-07	-0.257097	0.0971611	-1465.52
SAMHD1	0.00814227	0.061665	-0.220214	0.31841	FALSE	6.7e-07	-0.220214	0.0832218	-1838.97
RPN2	0.00813753	0.061665	-0.1524	0.68352	FALSE	4.11e-08	-0.1524	0.0575897	-2540.48
BRD1	0.00813573	0.061665	-0.568521	0.0416827	FALSE	4.99e-08	-0.568521	0.214829	-453.944
ZNF765	0.00816856	0.0618206	-1.42882	0.00887688	FALSE	2.14e-08	-1.42882	0.540191	-130.379
MYCBP	0.00818289	0.0618584	-0.587967	0.0362794	FALSE	7.46e-08	-0.587967	0.222342	-405.233
OLFM2	0.00818412	0.0618584	0.439921	0.0783481	FALSE	1.63e-07	0.439921	0.166361	-723.62
HLA-DQA1	0.00819166	0.0618756	1.33739	0.0254728	FALSE	3.85e-08	1.33739	0.505809	-166.087
HIBCH	0.00828697	0.0624747	-0.390043	0.0906986	FALSE	3.48e-07	-0.390043	0.147735	-787.136
C5orf56	0.00828407	0.0624747	-0.35475	0.079506	FALSE	0.0109995	-0.35475	0.134362	0
XRCC6	0.00827824	0.0624747	-0.158706	0.632188	FALSE	6.04e-08	-0.158706	0.0601043	-2498.62
DHRS3	0.00829431	0.0624832	-0.380834	0.102277	FALSE	3.03e-07	-0.380834	0.144264	-855.266
STEAP1	0.00830309	0.0624832	-0.128696	1.40293	FALSE	9.97e-09	-0.128696	0.0487579	-3846.04
RP11-727F15.9	0.00830409	0.0624832	-0.542294	0.0540332	FALSE	8.26e-08	-0.542294	0.205457	-546.152
AVIL	0.00832622	0.0626096	-0.680669	0.032034	FALSE	2.84e-08	-0.680669	0.257971	-373.421
RARRES1	0.00834648	0.0626398	-0.165783	2.48012	FALSE	6.68e-08	-0.165783	0.0628508	-4560.49
PAQR8	0.00834601	0.0626398	-1.00182	0.015824	FALSE	4.9e-08	-1.00182	0.379804	-210.644
RP11-138A9.2	0.00835162	0.0626398	-0.474549	0.0702431	FALSE	1.79e-07	-0.474549	0.179923	-686.875
NUPR1	0.00834995	0.0626398	-0.119781	1.80509	FALSE	1.73e-07	-0.119781	0.0454132	-4680.47
CISD3	0.00836986	0.0627365	-0.283077	0.175994	FALSE	7.46e-07	-0.283077	0.107357	-1248.31
TRIL	0.00838361	0.0627994	0.620632	0.0374373	FALSE	7.05e-08	0.620632	0.235425	-405.613
SIGIRR	0.00842458	0.0630257	0.376368	0.106909	FALSE	3.42e-07	0.376368	0.142858	-916.675
WSB2	0.00842276	0.0630257	-0.391105	0.0918564	FALSE	2.85e-07	-0.391105	0.148448	-807.284
CWC27	0.00843898	0.0630668	-0.346617	0.111926	FALSE	4.87e-08	-0.346617	0.131594	-892.558
FAU	0.00844536	0.0630668	0.0667735	7.00425	FALSE	9.3e-08	0.0667735	0.0253532	-6847.92
ZBTB45	0.0084462	0.0630668	-0.692401	0.0277885	FALSE	6.29e-08	-0.692401	0.262901	-329.399
LINC00116	0.00846475	0.063165	-0.226772	0.293323	FALSE	9.18e-07	-0.226772	0.0861286	-1809.8
ITGA5	0.00848503	0.0632698	0.360825	0.130838	FALSE	4.64e-08	0.360825	0.137085	-966.154
MMP2	0.00848959	0.0632698	-0.0945123	5.27634	FALSE	8.89e-09	-0.0945123	0.0359096	-6587.57
SLC26A11	0.00851831	0.0634436	-0.656681	0.031648	FALSE	2.51e-07	-0.656681	0.249612	-372.063
UAP1L1	0.00852726	0.0634699	1.25169	0.0108066	FALSE	6.07e-08	1.25169	0.475845	-144.131
FAM129A	0.00853859	0.0634904	0.895399	0.0192976	FALSE	1.38e-07	0.895399	0.340456	-235.448
RPL15	0.00854626	0.0634904	0.0591637	10.7244	FALSE	1.65e-07	0.0591637	0.0224983	-7621.23
ZC3H4	0.00854409	0.0634904	-0.810557	0.0216133	FALSE	7.82e-08	-0.810557	0.308223	-272.551
ZNF708	0.00855333	0.0635026	-0.799491	0.0208414	FALSE	4.63e-08	-0.799491	0.304057	-250.443
ATP10A	0.00858588	0.063704	1.01587	0.015824	FALSE	5.59e-08	1.01587	0.386538	-207.715
HNRNPD	0.00863398	0.0640203	-0.182304	0.472019	FALSE	2.17e-07	-0.182304	0.0694168	-2236.4
TLR4	0.0086428	0.0640452	1.4265	0.00887688	FALSE	2.36e-08	1.4265	0.543249	-131.26
PABPN1	0.00868885	0.0643458	-0.23555	0.269394	FALSE	1.03e-06	-0.23555	0.0897656	-1692.55
ZNF670	0.00873518	0.064609	-0.666352	0.0301042	FALSE	1.94e-08	-0.666352	0.254115	-338.375
FASTKD5	0.00873541	0.064609	-0.627624	0.0312621	FALSE	4.83e-08	-0.627624	0.239347	-346.012
TRMT11	0.0087589	0.064701	-0.440285	0.0683134	FALSE	4.11e-07	-0.440285	0.167963	-662.16
MBOAT7	0.00875684	0.064701	-0.399386	0.0833655	FALSE	8.11e-08	-0.399386	0.152356	-755.977
MME	0.00878337	0.0648255	-0.764378	0.0270166	FALSE	1.37e-07	-0.764378	0.291706	-332.418
PDE8B	0.0087868	0.0648255	1.21514	0.0108066	FALSE	5.1e-08	1.21514	0.463751	-156.292
SEZ6L2	0.00881239	0.0649325	0.676767	0.0258587	FALSE	0.00736505	0.676767	0.258382	0
ERN1	0.0088082	0.0649325	-0.284644	0.17638	FALSE	2.27e-08	-0.284644	0.108667	-1158.68
NUP98	0.00887876	0.0653805	-0.376866	0.0941721	FALSE	1.7e-07	-0.376866	0.144024	-806.252
PRKCH	0.00890043	0.0654989	-0.794917	0.0243149	FALSE	3.51e-08	-0.794917	0.303884	-279.24
C20orf27	0.00891942	0.0655974	0.324409	0.137399	FALSE	6.05e-08	0.324409	0.124051	-1047.23
PTPN14	0.0089369	0.0656848	-0.367044	0.103435	FALSE	3.98e-08	-0.367044	0.14039	-827.558
HSPA6	0.0089593	0.0658082	0.674311	0.191046	FALSE	1.01e-09	0.674311	0.258	-745.109
HLA-DPA1	0.0089977	0.0660075	0.322634	0.181783	FALSE	2.19e-08	0.322634	0.123513	-1222.63
TMED10	0.00899227	0.0660075	-0.14817	0.713624	FALSE	1.26e-07	-0.14817	0.0567192	-2709.2
RP11-536K7.3	0.0090046	0.0660168	-0.635986	0.0385951	FALSE	1.96e-07	-0.635986	0.243498	-439.888
CHMP4B	0.00903198	0.0661762	-0.147461	0.783095	FALSE	5e-07	-0.147461	0.0564804	-2862.55
SGCG	0.0090397	0.0661914	-0.94458	0.0181397	FALSE	1.98e-08	-0.94458	0.361832	-241.197
ZNF121	0.00909242	0.0665359	-0.48144	0.0559629	FALSE	9.85e-08	-0.48144	0.184561	-533.721
LOXL3	0.00910788	0.0665554	-0.876631	0.0146662	FALSE	0.0113154	-0.876631	0.336134	0
FAM134A	0.00911213	0.0665554	-0.369684	0.09533	FALSE	1.41e-07	-0.369684	0.14176	-800.396
SH3BP5	0.00911125	0.0665554	0.356219	0.130838	FALSE	2.5e-08	0.356219	0.136595	-1037.13
SMARCA5	0.00912856	0.0665925	-0.236099	0.263991	FALSE	2.61e-07	-0.236099	0.0905564	-1566.29
KDM6A	0.00912835	0.0665925	-0.841812	0.0189116	FALSE	3.71e-08	-0.841812	0.322879	-233.713
ABCA8	0.00913456	0.0665948	-0.240064	0.275183	FALSE	4.29e-07	-0.240064	0.0920852	-1735.54
TCEAL5	0.00916243	0.0667565	1.37565	0.0100347	FALSE	4.3e-09	1.37565	0.52789	-131.994
ZCCHC11	0.00917859	0.0667912	-0.343629	0.113856	FALSE	5.02e-07	-0.343629	0.131894	-902.134
IBTK	0.00917544	0.0667912	-0.350849	0.104979	FALSE	1.75e-07	-0.350849	0.13466	-827.54
VCL	0.00921984	0.0670082	-0.22822	0.280973	FALSE	1.41e-07	-0.22822	0.0876489	-1609.43
2005-03-01	0.00921789	0.0670082	-0.300464	0.149363	FALSE	1.13e-07	-0.300464	0.115391	-1116.3
PANK3	0.00925521	0.0672235	-0.452154	0.0609803	FALSE	5.86e-08	-0.452154	0.17374	-568.543
SAR1A	0.00926764	0.0672722	-0.168699	0.612119	FALSE	4.19e-08	-0.168699	0.064834	-2651.05
ACTR3B	0.00930671	0.0674305	-0.927299	0.0146662	FALSE	7.43e-09	-0.927299	0.356574	-187.957
ATP6V0D1	0.00930572	0.0674305	0.214239	0.324585	FALSE	2.79e-07	0.214239	0.0823802	-1852.38
SUSD2	0.00930034	0.0674305	1.03568	0.0150521	FALSE	6.03e-08	1.03568	0.398213	-201.39
ETF1	0.00933796	0.0675579	-0.198523	0.389425	FALSE	3.2e-08	-0.198523	0.076372	-1956.35
CCAR2	0.00933468	0.0675579	-0.589829	0.0385951	FALSE	9.59e-08	-0.589829	0.226897	-427.738
TXN	0.00934158	0.0675579	-0.104394	2.60015	FALSE	1.32e-08	-0.104394	0.0401626	-5077.54
ASH1L	0.00936979	0.0677201	-0.254782	0.217291	FALSE	3.29e-07	-0.254782	0.0980588	-1395.3
UNC119B	0.00937599	0.0677232	-0.750092	0.0216133	FALSE	8.81e-08	-0.750092	0.288716	-260.622
ITIH5	0.00938365	0.0677368	-0.173972	0.559244	FALSE	2.5e-07	-0.173972	0.0669703	-2590.8
MUS81	0.00939201	0.0677554	-0.629278	0.0328059	FALSE	2.44e-07	-0.629278	0.242268	-371.865
FAM46A	0.00942169	0.0679277	0.215975	0.458124	FALSE	3.87e-09	0.215975	0.0831838	-2119.86
POLR1D	0.00948934	0.0683734	-0.213312	0.313393	FALSE	1.41e-07	-0.213312	0.0822359	-1700.36
PSMB8	0.00951387	0.068508	0.245889	0.243149	FALSE	1.47e-07	0.245889	0.0948273	-1513.24
TOP3B	0.00954573	0.0686952	1.25129	0.0104207	FALSE	3.69e-08	1.25129	0.482777	-143.266
TTC28	0.00956707	0.0688066	-0.38322	0.0930143	FALSE	4.77e-08	-0.38322	0.147899	-802.808
PSMB9	0.009609	0.0690658	0.295978	0.169433	FALSE	3.47e-07	0.295978	0.114295	-1173.85
CSNK2A2	0.00964925	0.0693126	-0.688026	0.0289464	FALSE	3.13e-08	-0.688026	0.265837	-326.093
SKAP2	0.0096641	0.0693343	-0.195125	0.403705	FALSE	9.81e-08	-0.195125	0.0754069	-2081.9
SCRN1	0.00966163	0.0693343	0.780172	0.0231571	FALSE	2.15e-08	0.780172	0.301491	-272.056
BLVRA	0.00967385	0.0693564	-0.243208	0.233887	FALSE	1.21e-07	-0.243208	0.0940015	-1408.92
CHD2	0.00967901	0.0693564	-0.354265	0.105365	FALSE	4.87e-07	-0.354265	0.136936	-867.728
IRF2BPL	0.00970528	0.0695021	-0.286644	0.196063	FALSE	1.84e-07	-0.286644	0.110838	-1438.87
PCNXL4	0.00973678	0.0696426	-0.37167	0.0968738	FALSE	3.49e-08	-0.37167	0.143777	-808.206
TMEM189	0.00973347	0.0696426	-0.329845	0.121189	FALSE	4.29e-07	-0.329845	0.127592	-929.927
TSSC1	0.00976936	0.069748	-0.521093	0.0447704	FALSE	1.6e-07	-0.521093	0.20167	-459.163
STAM2	0.00976293	0.069748	-0.487197	0.0505596	FALSE	8.64e-08	-0.487197	0.188535	-480.042
IQGAP1	0.00976406	0.069748	-0.205876	0.346584	FALSE	3.6e-07	-0.205876	0.0796711	-1887.76
MAPKAPK2	0.00977951	0.069778	-0.242065	0.225782	FALSE	1.32e-07	-0.242065	0.0936957	-1415.61
NFE2L3	0.00979584	0.069852	1.14192	0.0119645	FALSE	1.25e-08	1.14192	0.442097	-168.543
BHLHE41	0.00982889	0.070045	0.779187	0.0266306	FALSE	3.45e-08	0.779187	0.301801	-301.469
SNHG12	0.00985181	0.0701657	-0.406177	0.079506	FALSE	2.7e-07	-0.406177	0.157373	-704.211
PNKP	0.00987942	0.0703196	-0.37218	0.0899267	FALSE	1.76e-07	-0.37218	0.144255	-774.59
SLTM	0.00989377	0.070379	-0.204607	0.346198	FALSE	2.94e-07	-0.204607	0.0793196	-1905.83
FAM13C	0.00996654	0.0708537	0.427721	0.079506	FALSE	6.74e-08	0.427721	0.165977	-762.288
RP11-421L21.3	0.00997918	0.0709006	-0.808871	0.0208414	FALSE	4.15e-08	-0.808871	0.313936	-273.875
CTSS	0.0100114	0.0710229	0.464118	0.0845233	FALSE	3.91e-08	0.464118	0.18021	-721.302
KBTBD7	0.010004	0.0710229	-0.480469	0.0814357	FALSE	1.56e-07	-0.480469	0.18654	-691.623
PTGIS	0.0100146	0.0710229	0.405901	0.0837514	FALSE	2.53e-08	0.405901	0.157612	-692.834
B4GALT1	0.0100253	0.0710562	-0.217864	0.545735	FALSE	1.69e-07	-0.217864	0.0846089	-2389.57
NXN	0.0100656	0.0712988	0.503888	0.0509456	FALSE	8.12e-08	0.503888	0.195794	-487.666
TSG101	0.0101226	0.0716591	-0.266883	0.191046	FALSE	5.51e-07	-0.266883	0.10378	-1306.41
RASSF2	0.0101294	0.071664	0.522898	0.0513315	FALSE	1.34e-07	0.522898	0.203353	-505.604
UBE4A	0.0101528	0.0717614	-0.430378	0.0671555	FALSE	1.75e-07	-0.430378	0.167424	-611.352
MEGF8	0.0101554	0.0717614	-0.737681	0.0231571	FALSE	2.27e-08	-0.737681	0.28698	-270.478
AL132709.8	0.0101696	0.0718182	0.816129	0.0216133	FALSE	1.54e-08	0.816129	0.317559	-267.787
TTC17	0.0102482	0.0723297	-0.277588	0.177538	FALSE	3.75e-07	-0.277588	0.108123	-1238.33
SRSF7	0.0102572	0.0723498	-0.134317	1.13508	FALSE	2.36e-07	-0.134317	0.0523239	-3625.84
NCOR1	0.0102877	0.072521	-0.198466	0.351602	FALSE	3.68e-07	-0.198466	0.0773442	-1859.08
CCDC184	0.0103395	0.0728424	1.15459	0.0115785	FALSE	1.81e-08	1.15459	0.450263	-160.456
SUGCT	0.0104182	0.073309	0.660628	0.0335778	FALSE	5.76e-08	0.660628	0.257894	-370.666
KDM7A	0.0104126	0.073309	-0.354238	0.0988036	FALSE	3.25e-07	-0.354238	0.138276	-810.325
WASF2	0.0104307	0.0733528	0.175386	0.560401	FALSE	5.53e-08	0.175386	0.0684777	-2614.32
EMC1	0.0104688	0.0735359	-0.43588	0.0710151	FALSE	2.56e-07	-0.43588	0.170269	-667.546
CDK17	0.0104693	0.0735359	-0.282894	0.17638	FALSE	3.62e-07	-0.282894	0.110508	-1272.93
ALAS1	0.0104797	0.0735652	-0.325569	0.121189	FALSE	3.25e-08	-0.325569	0.127196	-861.634
RAP2B	0.0105056	0.0736583	-0.333591	0.125048	FALSE	2.74e-07	-0.333591	0.130374	-999.705
FRS2	0.0105048	0.0736583	-0.351206	0.10768	FALSE	5.66e-08	-0.351206	0.137257	-899.512
PSD	0.010573	0.0740868	1.12917	0.0115785	FALSE	2.02e-08	1.12917	0.441685	-170.184
TMX1	0.0106421	0.0744822	-0.275478	0.182169	FALSE	1.36e-07	-0.275478	0.107851	-1272.4
TECR	0.0106417	0.0744822	-0.179572	0.467387	FALSE	3.95e-07	-0.179572	0.0703031	-2332.7
THOC6	0.0106611	0.0745535	-0.288249	0.154766	FALSE	1.59e-07	-0.288249	0.112879	-1087.09
PTTG1IP	0.010665	0.0745535	-0.187293	0.410652	FALSE	1.16e-07	-0.187293	0.073348	-2058.42
NFASC	0.0106894	0.0746347	-0.397855	0.0849093	FALSE	1.66e-07	-0.397855	0.155857	-742.212
2008-09-01	0.0106843	0.0746347	0.378201	0.0922424	FALSE	2.51e-07	0.378201	0.148148	-786.289
KPNA2	0.0106968	0.0746418	-0.21628	0.414898	FALSE	1.59e-07	-0.21628	0.084734	-1939.23
LONRF2	0.0108186	0.0754021	-0.997675	0.0108066	FALSE	0.000747994	-0.997675	0.391475	0
ARPC1B	0.0108133	0.0754021	0.156305	0.656117	FALSE	6.21e-07	0.156305	0.0613279	-2586.88
CEBPZOS	0.0108303	0.0754391	-0.310387	0.134697	FALSE	4.72e-07	-0.310387	0.12181	-1080.1
ZC3H11A	0.0108491	0.0755248	-0.278174	0.163643	FALSE	8.05e-08	-0.278174	0.109194	-1151.75
ST6GALNAC4	0.0108998	0.0758326	-0.407333	0.0771903	FALSE	5.39e-08	-0.407333	0.159996	-655.556
RERE	0.0109115	0.0758691	0.321735	0.126592	FALSE	1.91e-07	0.321735	0.126393	-1041.18
MRPS23	0.0109432	0.0760038	-0.277628	0.159784	FALSE	6.18e-07	-0.277628	0.109109	-1109.9
GRAMD4	0.0109438	0.0760038	-0.728739	0.0262447	FALSE	9.21e-08	-0.728739	0.286399	-316.747
CHRAC1	0.0109601	0.0760269	-0.36203	0.0968738	FALSE	2.47e-07	-0.36203	0.142309	-841.118
EMC6	0.0109554	0.0760269	-0.238315	0.232729	FALSE	7.05e-07	-0.238315	0.0936727	-1475.26
SCP2	0.0110054	0.0762956	-0.158815	0.585488	FALSE	1.41e-07	-0.158815	0.0624634	-2486.54
SLC33A1	0.011053	0.0765352	-0.435961	0.0640679	FALSE	2.17e-07	-0.435961	0.171569	-573.528
LGALS3BP	0.0110513	0.0765352	0.115681	1.29062	FALSE	9.57e-07	0.115681	0.0455243	-3736.37
NSD1	0.0110715	0.076618	-0.423049	0.0733308	FALSE	1.94e-07	-0.423049	0.166526	-714.488
SYDE2	0.0110914	0.0766654	-0.810131	0.0192976	FALSE	3.32e-08	-0.810131	0.318974	-240.375
TMEM159	0.011091	0.0766654	0.487466	0.0571208	FALSE	3.95e-08	0.487466	0.19193	-592.273
PRUNE2	0.0111074	0.0767305	1.40958	0.0108066	FALSE	8.81e-10	1.40958	0.555107	-131.813
RPL29	0.0111246	0.0768044	0.065725	6.57854	FALSE	1.94e-08	0.065725	0.0258886	-6613.17
VAMP8	0.0111438	0.0768708	-0.38744	0.100347	FALSE	1.19e-07	-0.38744	0.152646	-868.524
UTP6	0.0111473	0.0768708	-0.322318	0.128522	FALSE	1.25e-07	-0.322318	0.126995	-997.97
ELP5	0.0112084	0.0772462	0.361488	0.0995755	FALSE	1.52e-07	0.361488	0.142535	-893.692
GPR135	0.0112292	0.0773443	-0.840948	0.0169819	FALSE	1.75e-08	-0.840948	0.331672	-206.153
NDUFB11	0.0112445	0.0774041	-0.127848	0.957931	FALSE	2.67e-07	-0.127848	0.0504328	-3234.19
NIP7	0.0112519	0.0774093	-0.271869	0.182169	FALSE	7.06e-07	-0.271869	0.107255	-1263.17
PPIP5K2	0.011265	0.0774221	-0.474856	0.0563489	FALSE	3.75e-08	-0.474856	0.187366	-551.745
NT5C3A	0.0112669	0.0774221	-0.326242	0.121961	FALSE	8.34e-08	-0.326242	0.12873	-991.329
UBTD2	0.0112975	0.0775869	-0.340521	0.114628	FALSE	3.42e-07	-0.340521	0.134415	-950.397
TGFB1	0.011349	0.0778951	0.33524	0.120803	FALSE	1.46e-07	0.33524	0.132414	-960.767
SLC25A19	0.0113588	0.0779165	0.737406	0.023543	FALSE	9.86e-08	0.737406	0.291297	-265.025
TBC1D20	0.0114186	0.0782811	-0.364808	0.0922424	FALSE	7.52e-08	-0.364808	0.144215	-794.985
NRM	0.011467	0.0783378	0.602881	0.0351216	FALSE	1.37e-07	0.602881	0.238469	-377.13
DNPH1	0.011467	0.0783378	0.214865	0.295639	FALSE	2.47e-07	0.214865	0.0849894	-1666.82
POLR2J2	0.0114641	0.0783378	-1.32807	0.00771903	FALSE	1.95e-08	-1.32807	0.525296	-114.527
ANXA11	0.0114566	0.0783378	-0.173233	0.47665	FALSE	1.86e-07	-0.173233	0.0685133	-2223.06
CCDC68	0.0114572	0.0783378	1.13146	0.0150521	FALSE	4.6e-09	1.13146	0.447496	-180.155
MLC1	0.0114576	0.0783378	-1.08016	0.0115785	FALSE	5.1e-08	-1.08016	0.427207	-167.458
DNASE1L1	0.01151	0.0785794	-0.746243	0.0208414	FALSE	1.42e-07	-0.746243	0.295329	-255.543
SYVN1	0.0115158	0.0785794	-0.412871	0.0721729	FALSE	1.05e-07	-0.412871	0.163407	-655.48
CD68	0.0115407	0.0787035	-0.297106	0.15631	FALSE	1.09e-07	-0.297106	0.117625	-1138.5
XAF1	0.0115845	0.0789562	0.494589	0.0513315	FALSE	2.78e-07	0.494589	0.195911	-517.238
RRAGA	0.011612	0.0790857	-0.178065	0.450791	FALSE	1.37e-07	-0.178065	0.0705563	-2161.03
GOLGA5	0.011617	0.0790857	-0.43622	0.0640679	FALSE	1.1e-07	-0.43622	0.172858	-585.134
CDKN3	0.0116316	0.0791393	1.15725	0.0127364	FALSE	2.53e-08	1.15725	0.458658	-161.266
DGKE	0.0116508	0.0792243	-0.954255	0.0142802	FALSE	1.76e-08	-0.954255	0.37829	-191.307
CPSF6	0.011677	0.0793562	-0.290067	0.149363	FALSE	3.42e-07	-0.290067	0.115026	-1065.5
RPL10	0.0116892	0.0793931	0.0487656	26.5249	FALSE	2.21e-07	0.0487656	0.0193408	-9627.71
CNTROB	0.0117202	0.0795576	-0.800259	0.0192976	FALSE	3.64e-08	-0.800259	0.317505	-241.55
LYN	0.0118115	0.0801309	-0.769359	0.0204554	FALSE	6.53e-08	-0.769359	0.305577	-255.354
LMO7	0.0118581	0.0803565	0.581935	0.039367	FALSE	1.78e-07	0.581935	0.231263	-431.203
CYB5B	0.0118585	0.0803565	-0.297062	0.149363	FALSE	3.76e-07	-0.297062	0.118054	-1120.17
GTF2A2	0.0119045	0.0806029	-0.174101	0.435353	FALSE	4.97e-07	-0.174101	0.0692262	-2064.25
GART	0.0119086	0.0806029	-0.361557	0.0995755	FALSE	2.49e-07	-0.361557	0.143769	-844.517
KIAA1324L	0.0119489	0.0807458	0.655063	0.0347356	FALSE	9.4e-09	0.655063	0.260602	-364.68
LDOC1	0.0119374	0.0807458	-0.318602	0.126592	FALSE	9.97e-08	-0.318602	0.126731	-978.747
HSPA13	0.0119504	0.0807458	-0.393099	0.0833655	FALSE	1.03e-07	-0.393099	0.156388	-718.897
COL4A4	0.011966	0.0808052	1.11591	0.01621	FALSE	1.72e-09	1.11591	0.444029	-166.287
RP11-392P7.6	0.0119804	0.0808557	-1.04692	0.0108066	FALSE	2.62e-08	-1.04692	0.416648	-144.118
MORN2	0.0120008	0.0809466	-0.30972	0.127364	FALSE	2.56e-07	-0.30972	0.12329	-953.827
RP2	0.0120096	0.0809597	-0.528861	0.0447704	FALSE	2.83e-08	-0.528861	0.210546	-476.306
UBXN11	0.0120355	0.0810876	-0.587798	0.0351216	FALSE	2.59e-07	-0.587798	0.23408	-390.29
FADS2	0.012056	0.0811789	0.6315	0.0331918	FALSE	3.88e-08	0.6315	0.251543	-346.202
ICA1L	0.0120726	0.0812443	-0.728355	0.0243149	FALSE	1.57e-08	-0.728355	0.29018	-295.346
HAUS5	0.0120884	0.0812572	-0.796819	0.0192976	FALSE	5.41e-08	-0.796819	0.317514	-250.141
DESI1	0.0120884	0.0812572	-0.419555	0.0679274	FALSE	2.9e-07	-0.419555	0.167183	-603.372
SLC25A4	0.0121365	0.0814867	0.356256	0.111154	FALSE	7.09e-08	0.356256	0.142039	-883.646
NKIRAS2	0.0121346	0.0814867	-0.376529	0.0833655	FALSE	1.94e-07	-0.376529	0.150119	-733.006
SLC41A1	0.0121998	0.0818423	-0.449331	0.0625241	FALSE	3.12e-07	-0.449331	0.17928	-592.999
YWHAB	0.0122034	0.0818423	-0.125006	0.988421	FALSE	1.51e-06	-0.125006	0.0498785	-3171.22
HADHA	0.0122326	0.0818889	-0.186103	0.39367	FALSE	4.9e-07	-0.186103	0.0742821	-2027.1
SLC6A6	0.0122453	0.0818889	-0.351044	0.113084	FALSE	1.8e-07	-0.351044	0.140138	-898.665
LARP1B	0.0122429	0.0818889	-0.352281	0.108452	FALSE	7.82e-08	-0.352281	0.140628	-953.024
TMOD2	0.0122401	0.0818889	-1.15071	0.0104207	FALSE	6.23e-09	-1.15071	0.459338	-143.938
EGLN2	0.012222	0.0818889	-0.246989	0.211887	FALSE	8.27e-07	-0.246989	0.0985721	-1414.08
AAGAB	0.0122933	0.0821631	-0.438622	0.0625241	FALSE	1.3e-07	-0.438622	0.175196	-593.341
TMEM14B	0.0123458	0.0824321	-0.1863	0.389039	FALSE	3.89e-07	-0.1863	0.0744574	-1997.42
N4BP1	0.0123476	0.0824321	-0.525667	0.0401389	FALSE	2.43e-07	-0.525667	0.210094	-429.718
CREB3L2	0.0123702	0.0825358	-0.214289	0.290235	FALSE	2.47e-07	-0.214289	0.0856674	-1644.34
TRAPPC3	0.0123923	0.0826364	0.228505	0.252798	FALSE	6.14e-07	0.228505	0.0913737	-1583.41
ADAMTS9-AS1	0.0124475	0.0828372	-0.757243	0.0254728	FALSE	3e-08	-0.757243	0.302995	-313.952
DIRC2	0.0124778	0.0828372	-0.590634	0.0324199	FALSE	2.2e-07	-0.590634	0.236411	-366.501
IQGAP2	0.0124383	0.0828372	1.44832	0.00810498	FALSE	5.2e-08	1.44832	0.579455	-115.969
MCUR1	0.0124757	0.0828372	-0.269551	0.171362	FALSE	2.98e-07	-0.269551	0.10789	-1200.66
XXbac-BPG299F13.17	0.012486	0.0828372	1.36829	0.00964878	FALSE	6.16e-09	1.36829	0.54773	-139.26
TMEM217	0.01248	0.0828372	-0.848491	0.0173678	FALSE	3.05e-08	-0.848491	0.339631	-212.518
ST5	0.0124689	0.0828372	-0.289395	0.158626	FALSE	7.88e-08	-0.289395	0.115823	-1210.68
RAP1B	0.0124605	0.0828372	-0.197891	0.371671	FALSE	6e-07	-0.197891	0.0791935	-1923.38
ERBB2	0.0124615	0.0828372	-0.465522	0.0563489	FALSE	1.9e-07	-0.465522	0.186298	-578.831
YME1L1	0.0125207	0.0830175	-0.219933	0.281745	FALSE	1.27e-07	-0.219933	0.0880748	-1601.05
C1QTNF6	0.0125273	0.0830175	0.881352	0.0173678	FALSE	2.58e-08	0.881352	0.352974	-215.996
LINC00844	0.0125415	0.0830647	-1.24343	0.00887688	FALSE	6.41e-08	-1.24343	0.498062	-133.519
MRGPRF	0.0125605	0.0831432	-0.186885	0.465071	FALSE	1.58e-07	-0.186885	0.074874	-2210.09
BCCIP	0.0126525	0.0837048	-0.274473	0.167889	FALSE	5.16e-07	-0.274473	0.11008	-1182.32
KIDINS220	0.0126873	0.0838407	-0.320618	0.113856	FALSE	3.24e-07	-0.320618	0.128637	-907.793
UBA5	0.0126835	0.0838407	-0.34066	0.0991895	FALSE	3.49e-07	-0.34066	0.136672	-784.394
FAM57A	0.0127027	0.0838953	-0.449855	0.0613663	FALSE	3.18e-08	-0.449855	0.18052	-569.502
PDIA6	0.0127345	0.0840576	-0.124506	1.07333	FALSE	1.59e-08	-0.124506	0.0499803	-3183.82
LIFR	0.0127435	0.0840697	-0.490356	0.0509456	FALSE	5.85e-08	-0.490356	0.196862	-520.977
RASL11B	0.0128184	0.0845166	1.11065	0.0119645	FALSE	1.83e-08	1.11065	0.446265	-159.061
KIF1B	0.0128466	0.0846072	-0.27221	0.17445	FALSE	1.96e-07	-0.27221	0.109409	-1201.74
PRKD1	0.0128437	0.0846072	-0.636259	0.0301042	FALSE	1.28e-07	-0.636259	0.255724	-338.862
FAM92A1	0.012871	0.0847202	-0.249653	0.201467	FALSE	4.39e-07	-0.249653	0.10037	-1316.78
CD69	0.0129064	0.0848581	1.34633	0.0169819	FALSE	9.12e-09	1.34633	0.541492	-151.056
DDX17	0.0128999	0.0848581	-0.154367	0.63875	FALSE	1.9e-07	-0.154367	0.0620817	-2751.68
HOXA3	0.0129214	0.0848678	-0.513422	0.0455423	FALSE	1.16e-07	-0.513422	0.206531	-454.025
EGFR	0.0129296	0.0848678	-0.368425	0.0891548	FALSE	3.76e-08	-0.368425	0.148218	-773.311
SMS	0.0129238	0.0848678	-0.194271	0.532613	FALSE	8.7e-09	-0.194271	0.0781504	-2351.23
ATP11C	0.0129549	0.084986	-0.513977	0.0424547	FALSE	1.55e-08	-0.513977	0.206831	-430.019
APBA3	0.0130187	0.0853569	-0.56281	0.0362794	FALSE	8.47e-08	-0.56281	0.226642	-390.167
PRKAG2	0.0130262	0.0853581	-0.439164	0.0659977	FALSE	1.46e-07	-0.439164	0.176864	-666.268
TANC1	0.0130881	0.0857008	-0.349811	0.102663	FALSE	1.41e-07	-0.349811	0.140975	-894.495
CAV1	0.0130931	0.0857008	-0.126295	2.23273	FALSE	1.8e-08	-0.126295	0.0509	-4918.32
LPAR1	0.0131093	0.0857112	-0.235763	0.248553	FALSE	2.64e-07	-0.235763	0.0950355	-1597.25
CSDC2	0.0131085	0.0857112	-0.367113	0.0961019	FALSE	1.77e-07	-0.367113	0.147981	-818.063
GLIPR2	0.0131278	0.0857842	-0.19945	0.348514	FALSE	1.22e-07	-0.19945	0.0804143	-1887.45
HSD17B11	0.0131683	0.0859531	-0.203176	0.355847	FALSE	5.7e-08	-0.203176	0.0819526	-1993.49
KCTD17	0.0131614	0.0859531	0.574905	0.0358935	FALSE	1.26e-07	0.574905	0.231875	-393.195
SOX9	0.0132239	0.0862681	-0.393348	0.0930143	FALSE	3.92e-08	-0.393348	0.158757	-816.567
CASP8	0.0133402	0.0869369	-0.877099	0.01621	FALSE	9.69e-08	-0.877099	0.354447	-220.663
PRKAR1B	0.0133459	0.0869369	1.02876	0.0135083	FALSE	2.42e-08	1.02876	0.415762	-163.106
TCTN1	0.0133487	0.0869369	-0.316669	0.125048	FALSE	3.82e-07	-0.316669	0.127982	-997.762
DISP1	0.0133619	0.0869747	-0.918321	0.0138942	FALSE	2.25e-08	-0.918321	0.371193	-186.83
SPX	0.0133826	0.087061	-0.983695	0.0138942	FALSE	1.2e-07	-0.983695	0.397706	-197.997
TP53INP2	0.0134029	0.0871448	-0.401915	0.0706291	FALSE	5.83e-08	-0.401915	0.162529	-640.371
RRBP1	0.0134171	0.0871886	-0.124786	1.05288	FALSE	1.04e-06	-0.124786	0.0504694	-3367.46
DHX15	0.0134469	0.0872858	-0.235683	0.23543	FALSE	1.77e-07	-0.235683	0.0953522	-1493.94
ERCC1	0.0134455	0.0872858	-0.194846	0.341953	FALSE	2.45e-07	-0.194846	0.0788292	-1830.14
PRKG1	0.0134588	0.0873143	-0.318747	0.117329	FALSE	4.04e-07	-0.318747	0.128975	-911.888
COL6A3	0.0134961	0.0873151	0.0922178	3.53609	FALSE	2.31e-08	0.0922178	0.037329	-5849.95
LRRC2	0.0134953	0.0873151	-1.12176	0.0108066	FALSE	5.55e-09	-1.12176	0.454075	-139.188
ATOX1	0.0134705	0.0873151	0.152826	0.628715	FALSE	1.75e-07	0.152826	0.0618459	-2671.36
METTL4	0.0134814	0.0873151	-0.941011	0.0131223	FALSE	6.91e-08	-0.941011	0.380854	-179.517
MYPOP	0.0134961	0.0873151	0.867961	0.0177538	FALSE	1.2e-07	0.867961	0.351344	-230.175
HES6	0.0135198	0.0873782	-0.829963	0.0312621	FALSE	5.06e-10	-0.829963	0.336048	-270.313
THUMPD3-AS1	0.0135208	0.0873782	-0.208933	0.336164	FALSE	6.3e-08	-0.208933	0.0845967	-1885.05
OXCT2	0.0135419	0.0874668	1.3412	0.00887688	FALSE	0.00199812	1.3412	0.543172	0
ZFC3H1	0.0135574	0.087476	-0.291125	0.14396	FALSE	1.16e-07	-0.291125	0.117922	-1038.76
LRRC75B	0.0135583	0.087476	0.999444	0.0142802	FALSE	2.42e-08	0.999444	0.404837	-195.567
SUCLG2	0.013574	0.0875293	-0.274984	0.166345	FALSE	8.78e-08	-0.274984	0.111404	-1194.17
DDX41	0.013619	0.087733	-0.332594	0.101891	FALSE	2.96e-07	-0.332594	0.134809	-838.915
MIPOL1	0.0136206	0.087733	-0.726883	0.0212273	FALSE	8.73e-08	-0.726883	0.294629	-263.847
RAVER2	0.0136402	0.0877627	-0.871093	0.0181397	FALSE	7.22e-09	-0.871093	0.353155	-217.834
DPYS	0.0136363	0.0877627	-0.923538	0.0181397	FALSE	7.99e-09	-0.923538	0.374402	-221.719
WBP5	0.0136658	0.0878797	0.115234	1.42918	FALSE	7.22e-07	0.115234	0.0467306	-4154.52
FNDC3B	0.0136812	0.0879304	-0.200465	0.33076	FALSE	5.12e-08	-0.200465	0.081307	-1761.6
RP11-258F1.1	0.0137192	0.0880299	-1.31245	0.00771903	FALSE	2.88e-08	-1.31245	0.532534	-112.167
ACSS1	0.0137089	0.0880299	-0.680897	0.0262447	FALSE	7.93e-08	-0.680897	0.276248	-321.104
KCNK15	0.0137179	0.0880299	-0.656156	0.0281745	FALSE	5.9e-08	-0.656156	0.266236	-327.185
RNF152	0.0138028	0.0885178	-0.489586	0.0590506	FALSE	1.38e-07	-0.489586	0.198829	-566.647
SLC25A28	0.0138433	0.0887286	-0.39015	0.0764184	FALSE	1.04e-07	-0.39015	0.158514	-667.804
FAS	0.0138544	0.0887515	-0.223711	0.25164	FALSE	6.35e-07	-0.223711	0.0909017	-1553.28
GORAB	0.0139062	0.0889375	-0.590136	0.0324199	FALSE	4.56e-08	-0.590136	0.239924	-366.028
NDUFA5	0.0139024	0.0889375	-0.168974	0.477036	FALSE	4.24e-07	-0.168974	0.068695	-2326.06
CADM1	0.0138973	0.0889375	-0.452815	0.0679274	FALSE	1.68e-07	-0.452815	0.184078	-661.025
HLA-DRB1	0.0139492	0.089158	0.306588	0.296797	FALSE	1.55e-07	0.306588	0.124702	-1471.96
KPNA3	0.0139559	0.089158	-0.303692	0.12775	FALSE	1.38e-07	-0.303692	0.123533	-952.22
GDAP2	0.0140217	0.0895298	-0.776073	0.0173678	FALSE	1e-07	-0.776073	0.3159	-220.77
ENPP2	0.0140497	0.0896507	-0.245214	0.227325	FALSE	1.89e-08	-0.245214	0.0998435	-1409.92
RP11-680A11.5	0.014056	0.0896507	1.42241	0.00926283	FALSE	6.12e-09	1.42241	0.579199	-107.182
CCT5	0.0140645	0.0896567	-0.172118	0.452721	FALSE	1.25e-07	-0.172118	0.0700916	-2082.03
LDLR	0.0140809	0.0897121	-0.218931	0.326515	FALSE	2e-08	-0.218931	0.0891706	-1727.14
PURB	0.0140927	0.0897389	-0.331843	0.109224	FALSE	3.82e-07	-0.331843	0.135176	-857.777
C20orf24	0.0141061	0.0897751	-0.231248	0.226553	FALSE	5.69e-07	-0.231248	0.0942119	-1419.5
ABCB7	0.0141172	0.0897968	-0.485115	0.0470861	FALSE	2.62e-07	-0.485115	0.197662	-469.747
ENY2	0.0141834	0.0901694	-0.13857	0.726746	FALSE	5.68e-07	-0.13857	0.0564995	-2860.95
PDZD8	0.0142319	0.0904284	-0.402794	0.0787341	FALSE	2.41e-07	-0.402794	0.164315	-723.669
DENND4A	0.0142454	0.0904655	-0.439926	0.0621382	FALSE	1.81e-07	-0.439926	0.179487	-593.175
ADGRA3	0.0142644	0.0905369	-0.450475	0.0578927	FALSE	5.27e-08	-0.450475	0.183827	-568.878
USP8	0.0142817	0.0905587	-0.264339	0.174064	FALSE	1.95e-07	-0.264339	0.107889	-1207.64
PIGU	0.0142833	0.0905587	-0.380501	0.079506	FALSE	3.9e-07	-0.380501	0.155303	-726.029
YY1	0.0143035	0.0906378	-0.194284	0.343497	FALSE	4.94e-07	-0.194284	0.0793142	-1831.92
DENND2C	0.0143746	0.0910394	-0.769423	0.0223852	FALSE	4.39e-09	-0.769423	0.314337	-266.679
CIPC	0.0144423	0.0914185	-0.879582	0.0154381	FALSE	7.51e-08	-0.879582	0.35959	-200.212
CHP1	0.0145046	0.0917636	-0.286955	0.141258	FALSE	8.48e-08	-0.286955	0.117387	-1038.23
MAN2A1	0.0145355	0.0919092	-0.375016	0.087611	FALSE	8.84e-08	-0.375016	0.153459	-792.403
NDUFB3	0.0145772	0.0921234	-0.206261	0.297569	FALSE	7.2e-07	-0.206261	0.0844393	-1725.2
HEXB	0.0145951	0.0921868	0.168749	0.456966	FALSE	2.68e-07	0.168749	0.0690951	-2176.63
CMC2	0.0146165	0.092272	-0.250178	0.195677	FALSE	8.26e-07	-0.250178	0.102459	-1331.73
EIF5	0.014664	0.092522	-0.119912	1.15399	FALSE	7.51e-07	-0.119912	0.0491327	-3573.7
DENND3	0.0146742	0.0925369	1.08688	0.0119645	FALSE	1.25e-08	1.08688	0.445386	-163.412
CDH23	0.0147867	0.093196	-0.662287	0.0270166	FALSE	1.11e-07	-0.662287	0.2717	-314.075
PSMD2	0.0148245	0.0933837	-0.204601	0.296411	FALSE	3.78e-07	-0.204601	0.0839684	-1648.29
CDKN2C	0.0148634	0.0935788	-0.307818	0.135083	FALSE	2.27e-08	-0.307818	0.126378	-1008.44
OTUD3	0.0148723	0.0935848	-0.831173	0.0154381	FALSE	4.73e-08	-0.831173	0.341278	-198.852
FUNDC2	0.0149202	0.0937225	-0.148158	0.636434	FALSE	5.71e-08	-0.148158	0.0608625	-2589.82
FAM110B	0.0149285	0.0937225	0.537365	0.0443844	FALSE	2.6e-08	0.537365	0.220765	-473.867
CD248	0.0149103	0.0937225	0.229791	0.281359	FALSE	1.36e-08	0.229791	0.0943874	-1667.14
SLC9A3R1	0.0149342	0.0937225	0.674743	0.0289464	FALSE	1.03e-08	0.674743	0.277219	-344.845
SCAF1	0.014926	0.0937225	-0.469853	0.0532613	FALSE	6.43e-08	-0.469853	0.193024	-556.673
GPAM	0.0149632	0.0938541	-1.03298	0.0123504	FALSE	7.07e-08	-1.03298	0.424522	-169.996
SEC24A	0.0149923	0.0939864	-0.46792	0.047472	FALSE	2.1e-07	-0.46792	0.192357	-468.53
PARK7	0.0150133	0.094068	-0.101157	1.55152	FALSE	1.06e-06	-0.101157	0.0415933	-3942.64
ADGRB3	0.0150497	0.0942453	-0.796403	0.0192976	FALSE	5.06e-08	-0.796403	0.327578	-252.453
CILP2	0.0151075	0.0945567	1.32317	0.00926283	FALSE	3.38e-09	1.32317	0.544562	-125.405
MYC	0.0151567	0.0948145	0.170993	0.826322	FALSE	3.99e-08	0.170993	0.0704079	-3241.58
CAPN5	0.015173	0.0948658	-0.749705	0.0204554	FALSE	4.01e-08	-0.749705	0.308747	-253.051
TXLNA	0.0152196	0.0949013	-0.327787	0.101505	FALSE	3.45e-07	-0.327787	0.135052	-819.545
IER5	0.0152406	0.0949013	-0.29257	0.154381	FALSE	3.53e-07	-0.29257	0.120567	-1183.91
PXDN	0.0152185	0.0949013	0.453849	0.0648398	FALSE	3.89e-09	0.453849	0.186989	-578.098
EPHA1	0.0151951	0.0949013	-1.30789	0.00849093	FALSE	4.94e-09	-1.30789	0.538738	-113.219
TEAD1	0.0152435	0.0949013	-0.344333	0.100347	FALSE	6.41e-08	-0.344333	0.141903	-830.458
VPS18	0.0152149	0.0949013	-0.607228	0.0301042	FALSE	1.51e-07	-0.607228	0.250174	-353.051
IGFBP4	0.0152304	0.0949013	0.081541	7.89309	FALSE	8.7e-10	0.081541	0.0335995	-7491.02
EHD2	0.0152249	0.0949013	-0.199756	0.324971	FALSE	3.66e-07	-0.199756	0.0823062	-1809.1
SLC4A7	0.0152547	0.0949207	-0.275147	0.197993	FALSE	1.53e-07	-0.275147	0.113403	-1290.68
CDC42EP2	0.0152767	0.0950073	-0.291051	0.155152	FALSE	4.24e-08	-0.291051	0.119984	-1116.61
RPL13A	0.0152886	0.0950307	0.047986	21.5311	FALSE	8.86e-08	0.047986	0.0197842	-9102.35
DICER1	0.0153629	0.0954421	-0.327077	0.107294	FALSE	2.49e-07	-0.327077	0.134949	-899.908
FXYD1	0.0153805	0.0955006	-0.119949	1.2335	FALSE	1.18e-07	-0.119949	0.0494983	-3977.56
CCL2	0.0154022	0.0955345	-0.135188	11.8506	FALSE	5.78e-08	-0.135188	0.0557986	-8625.69
HELZ	0.0153969	0.0955345	-0.366112	0.087225	FALSE	6.43e-08	-0.366112	0.151104	-763.264
GLTSCR2	0.0154532	0.0957997	0.111897	1.32729	FALSE	3.82e-07	0.111897	0.0462084	-3761.23
DDX3Y	0.0154765	0.0958937	-0.213747	0.296797	FALSE	4.9e-08	-0.213747	0.0882876	-1680.87
GAS6	0.0155241	0.0961381	0.182747	0.472404	FALSE	7.74e-07	0.182747	0.0755178	-2393.46
PDLIM1	0.0155356	0.0961586	-0.118978	1.17059	FALSE	5.56e-07	-0.118978	0.0491716	-3572.46
SETD4	0.0155909	0.0964498	-0.612931	0.0308761	FALSE	3.59e-08	-0.612931	0.25345	-353.012
CDR2	0.0156211	0.0965853	-0.347281	0.0934002	FALSE	7.33e-08	-0.347281	0.143644	-789.545
GATAD2A	0.0156321	0.0966026	-0.330442	0.105751	FALSE	7.4e-08	-0.330442	0.136694	-843.511
GALNT16	0.0156468	0.096635	0.826956	0.0192976	FALSE	1.35e-07	0.826956	0.342134	-250.762
TRAPPC6A	0.0156538	0.096635	-0.398876	0.07912	FALSE	8.21e-08	-0.398876	0.165037	-769.213
CLSTN1	0.0156735	0.096669	-0.295275	0.133925	FALSE	2.92e-07	-0.295275	0.122195	-1052.87
UBALD1	0.0156758	0.096669	-0.294511	0.137013	FALSE	1.17e-07	-0.294511	0.121881	-1086.91
FCGR2A	0.0156882	0.0966945	1.1232	0.0104207	FALSE	2.08e-08	1.1232	0.464885	-149.882
THRAP3	0.0156998	0.0967151	-0.185785	0.368198	FALSE	2.89e-07	-0.185785	0.0769035	-1946.43
KATNAL1	0.0157244	0.0967938	-0.601218	0.0247009	FALSE	0.00124424	-0.601218	0.248926	0
UFM1	0.0157291	0.0967938	-0.191682	0.355847	FALSE	2.55e-07	-0.191682	0.0793668	-1903.77
MMGT1	0.0157696	0.0969921	-0.400991	0.071787	FALSE	7.4e-08	-0.400991	0.166097	-670.235
FEZ2	0.0157853	0.0970378	-0.20043	0.297954	FALSE	4.59e-07	-0.20043	0.0830337	-1673.56
PHC2	0.0158558	0.0973882	-0.276902	0.153609	FALSE	2.08e-07	-0.276902	0.114792	-1160.06
ATG4D	0.0158589	0.0973882	-0.625542	0.0285604	FALSE	2.29e-07	-0.625542	0.25933	-338.001
NUDT5	0.0159155	0.0976848	-0.235943	0.210729	FALSE	2.73e-07	-0.235943	0.0978672	-1314.53
WDR81	0.015948	0.0978325	-0.623737	0.0301042	FALSE	2.5e-08	-0.623737	0.258801	-333.568
HSPB6	0.0159689	0.09791	-0.158272	0.64724	FALSE	4.43e-07	-0.158272	0.0656832	-2773.1
MED12	0.0160144	0.0981371	-0.805851	0.0185257	FALSE	7.09e-08	-0.805851	0.334574	-248.921
EXOSC4	0.016038	0.0982308	-0.243401	0.199537	FALSE	4.57e-07	-0.243401	0.101078	-1328.29
TTC32	0.0161331	0.0986584	-0.693972	0.0250868	FALSE	1.11e-07	-0.693972	0.288447	-309.889
ZBTB2	0.0161293	0.0986584	-0.500096	0.0447704	FALSE	2.75e-08	-0.500096	0.207856	-452.535
LOXL4	0.0161319	0.0986584	-0.870732	0.0135083	FALSE	1.13e-07	-0.870732	0.361913	-179.141
SMAD9	0.0161647	0.0987546	0.858916	0.0169819	FALSE	2.25e-08	0.858916	0.357111	-220.017
PLEKHG2	0.0161657	0.0987546	0.602423	0.0312621	FALSE	1.17e-07	0.602423	0.250472	-357.049
LDB3	0.0162078	0.0989606	1.04924	0.0119645	FALSE	6.85e-08	1.04924	0.436421	-172.025
RAB21	0.0162285	0.0990353	-0.212317	0.274411	FALSE	3.42e-07	-0.212317	0.0883281	-1644.72
ASTE1	0.01625	0.0990631	-0.797616	0.0177538	FALSE	6.12e-08	-0.797616	0.33189	-234.249
GK5	0.0162489	0.0990631	-0.692013	0.0254728	FALSE	6.65e-08	-0.692013	0.287946	-298.464
NAPEPLD	0.0162606	0.0990767	-0.786981	0.0189116	FALSE	2.69e-08	-0.786981	0.327498	-245.094
GOLGA1	0.0162978	0.0992513	-0.870852	0.0154381	FALSE	5.29e-08	-0.870852	0.362526	-200.633
FAM122A	0.0163266	0.0993755	-0.442377	0.055191	FALSE	1.29e-07	-0.442377	0.184206	-551.799
TP53BP2	0.0163631	0.0994426	-0.321238	0.108838	FALSE	8.4e-08	-0.321238	0.133809	-868.936
RAB24	0.0163608	0.0994426	-0.835879	0.01621	FALSE	7.13e-08	-0.835879	0.348172	-214.971
AES	0.0163595	0.0994426	-0.169273	0.460826	FALSE	4.2e-07	-0.169273	0.0705071	-2278.29
ABI3BP	0.0164042	0.0996407	-0.169389	0.514087	FALSE	1.17e-07	-0.169389	0.0705848	-2244.49
TCTA	0.016427	0.0997277	-0.476312	0.0497877	FALSE	1.84e-07	-0.476312	0.198522	-501.268
CDK5RAP2	0.0164574	0.0998603	-0.435792	0.0578927	FALSE	1.04e-07	-0.435792	0.181685	-571.902
TNC	0.0164867	0.0998829	-0.305573	0.227711	FALSE	2.62e-08	-0.305573	0.12743	-1421.04
PVR	0.0164789	0.0998829	-0.657221	0.0247009	FALSE	5.5e-08	-0.657221	0.274055	-300.321
BLOC1S3	0.0164856	0.0998829	-0.788426	0.0173678	FALSE	5.23e-08	-0.788426	0.328787	-217.015
ABHD17C	0.0165089	0.099966	-0.577302	0.0339637	FALSE	2.93e-08	-0.577302	0.240797	-387.797
FAM131A	0.016536	0.100078	-0.49245	0.0467001	FALSE	7.91e-08	-0.49245	0.205456	-501.167
PTPN13	0.0166285	0.100534	-0.532998	0.0385951	FALSE	7.68e-08	-0.532998	0.222563	-413.765
NUP160	0.0166199	0.100534	-0.387248	0.0683134	FALSE	5.35e-07	-0.387248	0.16169	-647.32
ALCAM	0.0167366	0.101136	0.836915	0.0173678	FALSE	2.8e-08	0.836915	0.349816	-235.393
ACOT11	0.0167727	0.101302	-1.29026	0.00810498	FALSE	2.87e-08	-1.29026	0.539483	-125.406
PAK1IP1	0.016792	0.101338	-0.222119	0.234658	FALSE	8.19e-07	-0.222119	0.0928891	-1472.78
GGH	0.0167962	0.101338	-0.378701	0.0849093	FALSE	3.47e-07	-0.378701	0.158377	-772.953
KLHL22	0.0168047	0.101338	-0.575199	0.0331918	FALSE	1.15e-07	-0.575199	0.240573	-375.044
RNASE4	0.0168312	0.101446	-0.408052	0.0683134	FALSE	2.94e-07	-0.408052	0.170706	-671.552
UGDH	0.0168711	0.101595	0.198536	0.435739	FALSE	6.22e-08	0.198536	0.0830868	-2118.97
UQCC3	0.0168733	0.101595	-0.268931	0.163643	FALSE	5.52e-07	-0.268931	0.112549	-1215.7
C16orf70	0.016901	0.101658	-0.891295	0.0142802	FALSE	2.55e-08	-0.891295	0.373106	-190.182
KDM4B	0.0168962	0.101658	-0.421795	0.0463142	FALSE	0.00584374	-0.421795	0.17656	0
BCR	0.0169214	0.101728	-0.832317	0.0169819	FALSE	7.46e-08	-0.832317	0.348481	-214.785
COPB1	0.0169581	0.101896	-0.23097	0.220378	FALSE	5.29e-07	-0.23097	0.0967366	-1420.88
SCYL1	0.0170364	0.102314	-0.279831	0.139328	FALSE	8.5e-08	-0.279831	0.117284	-1041.3
DUS3L	0.0170714	0.102472	-0.418454	0.0625241	FALSE	2.62e-07	-0.418454	0.17544	-583.577
JAK1	0.0170983	0.102581	-0.159152	0.498649	FALSE	1.68e-07	-0.159152	0.0667419	-2225.03
ZNF559	0.0171612	0.102906	-0.547564	0.0370513	FALSE	1.7e-07	-0.547564	0.229756	-418.534
PAQR5	0.0171734	0.102914	-0.840038	0.0154381	FALSE	1.04e-07	-0.840038	0.352517	-202.04
MRPL40	0.0171801	0.102914	-0.190436	0.324971	FALSE	9.66e-07	-0.190436	0.0799202	-1809.33
FNDC4	0.0172204	0.103011	-0.214779	0.276341	FALSE	1.84e-07	-0.214779	0.0901688	-1690.32
LCORL	0.0172314	0.103011	-0.751446	0.0192976	FALSE	1.24e-07	-0.751446	0.315504	-253.286
CANX	0.0172189	0.103011	-0.149969	0.565419	FALSE	1.21e-07	-0.149969	0.0629592	-2407.54
WHAMM	0.0172278	0.103011	-0.458951	0.0494018	FALSE	1.44e-07	-0.458951	0.19269	-516.144
SOX4	0.0172643	0.103072	-0.113343	2.11772	FALSE	1.07e-08	-0.113343	0.0476024	-4971.43
PGS1	0.0172548	0.103072	-0.447721	0.0517175	FALSE	1.86e-07	-0.447721	0.188021	-523.284
RP11-91I8.3	0.0172681	0.103072	-1.32048	0.00810498	FALSE	3.83e-08	-1.32048	0.554605	-127.515
MPDU1	0.0172983	0.1032	-0.26417	0.159398	FALSE	7.49e-08	-0.26417	0.110981	-1157.8
SOD3	0.0173535	0.103477	-0.119684	1.58356	FALSE	3.01e-08	-0.119684	0.0503057	-4410.18
GPI	0.0173683	0.103512	-0.226798	0.225782	FALSE	3.23e-07	-0.226798	0.0953408	-1413.87
CSRNP1	0.0173791	0.103524	0.179635	0.459668	FALSE	2.36e-07	0.179635	0.0755218	-2163.8
UBE4B	0.0174639	0.103889	-0.586656	0.0281745	FALSE	9.94e-08	-0.586656	0.246827	-308.711
PPP3CA	0.017467	0.103889	-0.231225	0.260517	FALSE	2.58e-08	-0.231225	0.0972871	-1620.35
CXorf56	0.017464	0.103889	-0.537223	0.0351216	FALSE	4.96e-08	-0.537223	0.226029	-383.657
GLS	0.0174962	0.1039	-0.228977	0.226168	FALSE	5.28e-07	-0.228977	0.0963663	-1438.01
ACKR4	0.0175572	0.1039	1.11352	0.01621	FALSE	1.12e-10	1.11352	0.468886	-165.628
CEP162	0.0174831	0.1039	-0.612761	0.0312621	FALSE	8.1e-08	-0.612761	0.257854	-355.637
SH3BGRL	0.0174958	0.1039	0.13507	0.745658	FALSE	1.41e-07	0.13507	0.0568448	-2951.31
OAS1	0.0175281	0.1039	0.89815	0.0150521	FALSE	5.71e-08	0.89815	0.378098	-200.566
ZNF24	0.0175479	0.1039	-0.264489	0.160942	FALSE	6.2e-08	-0.264489	0.111363	-1141.88
SRSF6	0.0175418	0.1039	-0.221131	0.275569	FALSE	1.36e-07	-0.221131	0.093102	-1717.02
SAFB2	0.0175373	0.1039	-0.229841	0.224238	FALSE	7.55e-07	-0.229841	0.0967654	-1455.45
HSPBP1	0.0175575	0.1039	-0.27515	0.145504	FALSE	1.02e-07	-0.27515	0.115862	-1094.36
PPP6R2	0.0175538	0.1039	-0.444864	0.0540332	FALSE	7.73e-08	-0.444864	0.187319	-544.925
BRWD1	0.017733	0.104886	-0.317856	0.108066	FALSE	2.3e-07	-0.317856	0.134052	-885.832
FGF18	0.0177593	0.104959	1.14256	0.0111926	FALSE	7.25e-08	1.14256	0.481971	-159.109
CHCHD10	0.0177632	0.104959	-0.248877	0.233115	FALSE	2.95e-08	-0.248877	0.104988	-1469.67
TREM1	0.0177862	0.105041	-0.72025	0.0281745	FALSE	2.21e-08	-0.72025	0.303898	-324.162
SMARCA4	0.0178158	0.105164	-0.249237	0.183713	FALSE	1.96e-07	-0.249237	0.105189	-1204.83
PAK3	0.017829	0.105189	0.536721	0.0409108	FALSE	2.89e-08	0.536721	0.226546	-459.572
AFAP1L2	0.0178491	0.10525	-1.15865	0.00887688	FALSE	2.37e-08	-1.15865	0.489145	-131.597
ZNF584	0.0178573	0.10525	-0.632313	0.0262447	FALSE	1.9e-07	-0.632313	0.26696	-310.219
HIGD2A	0.0178791	0.105325	-0.161102	0.490544	FALSE	2.81e-07	-0.161102	0.0680298	-2290.29
CAMK2D	0.0178987	0.105388	-0.263283	0.166731	FALSE	6.65e-08	-0.263283	0.111198	-1206.2
P3H3	0.0179437	0.105599	0.297902	0.130452	FALSE	1.78e-07	0.297902	0.125868	-964.597
SSH2	0.0179572	0.105626	-0.511615	0.0385951	FALSE	1.65e-07	-0.511615	0.216191	-409.905
MCCC2	0.0180472	0.106102	-0.548758	0.0324199	FALSE	1.13e-07	-0.548758	0.232068	-356.649
ZNF219	0.0180673	0.106167	0.698624	0.0223852	FALSE	7.77e-08	0.698624	0.295497	-266.841
IBA57	0.0180871	0.106204	-0.649518	0.023929	FALSE	3.23e-08	-0.649518	0.274774	-286.626
CCND1	0.0180918	0.106204	-0.34349	0.130066	FALSE	7.09e-08	-0.34349	0.145317	-981.245
CDH6	0.0181646	0.106541	0.751757	0.023543	FALSE	5.39e-08	0.751757	0.318239	-280.195
SPDL1	0.0181691	0.106541	-0.725875	0.0212273	FALSE	7.93e-08	-0.725875	0.307294	-257.373
[truncated: 9,724 more rows]

## Sheet: Alveolar_macrophages
gene	pval	qval	log2fc	mean	zero_mean	grad	coef_mle	coef_sd	ll
C1QA	0	0	-1.15384	13.3967	FALSE	6.05719e-08	-1.15384	0.117805	-1197.01
C1QC	0	0	-1.09088	3.80165	FALSE	2.19996e-09	-1.09088	0.128555	-778.027
C1QB	0	0	-1.35846	11.4215	FALSE	1.04279e-08	-1.35846	0.141466	-1092.68
TIMP1	0	0	0.923176	6.64187	FALSE	1.05156e-07	0.923176	0.108212	-1026.39
FABP4	0	0	-3.70243	9.46006	FALSE	1.14752e-08	-3.70243	0.283515	-695.219
SCGB1A1	0	0	1.36488	8.52066	FALSE	7.273e-07	1.36488	0.148575	-883.946
B2M	0	0	-0.23019	74.73	FALSE	2.79605	-0.23019	0.0122353	0
MSR1	2.22045e-16	1.78163e-13	-1.53164	1.30579	FALSE	3.04505e-07	-1.53164	0.184806	-504.456
STMN1	8.88178e-16	6.33469e-13	-1.59095	1.93113	FALSE	1.5132e-08	-1.59095	0.197486	-512.512
GYPC	2.22045e-15	1.4253e-12	-1.38683	0.842975	FALSE	1.35755e-07	-1.38683	0.175013	-387.74
UBB	3.9746e-14	2.31936e-11	-0.580914	12.2287	FALSE	9.36165e-08	-0.580914	0.0768217	-1158.95
GRN	1.4988e-13	8.01734e-11	-0.568959	7.86226	FALSE	6.24014e-07	-0.568959	0.0770188	-1030.49
SCGB3A1	5.21139e-13	2.57322e-10	1.11615	4.60606	FALSE	7.85091e-09	1.11615	0.154599	-755.651
SNX10	1.02762e-12	4.71165e-10	-1.00766	1.27824	FALSE	3.14733e-08	-1.00766	0.141391	-502.317
RP11-598F7.3	3.58424e-12	1.53382e-09	-2.64204	0.46832	FALSE	5.54779e-08	-2.64204	0.380004	-258.471
ALDH2	1.9267e-11	7.72969e-09	-0.807751	2.01377	FALSE	3.69287e-07	-0.807751	0.120354	-631.403
VMO1	3.27232e-11	1.23559e-08	-1.95745	0.633609	FALSE	3.65451e-08	-1.95745	0.295073	-334.657
CTSC	6.54667e-11	2.33462e-08	-0.739246	2.85124	FALSE	2.8927e-09	-0.739246	0.113196	-710.543
IGFBP7	1.3916e-10	4.70142e-08	1.06686	2.22865	FALSE	2.92737e-07	1.06686	0.166261	-609.322
PPARG	1.49266e-10	4.79069e-08	-1.28133	0.61708	FALSE	2.49833e-08	-1.28133	0.200016	-361.934
SCCPDH	1.71901e-10	5.25445e-08	-1.08437	0.677686	FALSE	7.62804e-08	-1.08437	0.169843	-348.961
TMSB4X	2.37204e-10	6.92097e-08	-0.330875	133.121	FALSE	1.00534e-07	-0.330875	0.0522289	-1944.18
ALOX5AP	3.03512e-10	8.47061e-08	-0.603361	8.68595	FALSE	5.17561e-09	-0.603361	0.0958176	-1098.23
IFITM2	7.01336e-10	1.87578e-07	0.865011	1.16253	FALSE	2.59452e-08	0.865011	0.140292	-497.297
ACKR1	9.44693e-10	2.42559e-07	1.64334	0.77686	FALSE	1.1043e-07	1.64334	0.268587	-316.665
TXN	1.2668e-09	3.12754e-07	-0.547988	4.95041	FALSE	6.56333e-08	-0.547988	0.090255	-891.012
MYL12A	1.39161e-09	3.30842e-07	-0.44469	4.73003	FALSE	2.48279e-08	-0.44469	0.0734242	-829.986
SPARCL1	1.73814e-09	3.98468e-07	1.46462	1.11846	FALSE	9.78161e-09	1.46462	0.24327	-371.727
TSPO	1.80959e-09	4.00544e-07	-0.445746	6.39118	FALSE	7.8045e-08	-0.445746	0.0741176	-937.56
GCHFR	2.14012e-09	4.57915e-07	-0.874784	2.99174	FALSE	1.82435e-08	-0.874784	0.146119	-734.617
GLUL	2.83242e-09	5.77396e-07	-0.528112	6.69421	FALSE	5.34758e-08	-0.528112	0.0888923	-1009.43
CCL2	2.87844e-09	5.77396e-07	1.46435	1.66667	FALSE	1.4788e-08	1.46435	0.246591	-487.429
RGS2	3.09906e-09	6.02815e-07	0.998117	1.44353	FALSE	8.22599e-08	0.998117	0.168423	-580.757
RNF149	3.55026e-09	6.70268e-07	-0.837823	1.06612	FALSE	1.269e-07	-0.837823	0.14191	-480.523
LTA4H	3.69381e-09	6.77445e-07	-0.58271	3.29477	FALSE	2.48056e-08	-0.58271	0.0988088	-777.966
TKT	7.44044e-09	1.32667e-06	-0.728807	1.47658	FALSE	7.58196e-08	-0.728807	0.126077	-566.907
MCEMP1	7.74972e-09	1.34447e-06	-0.672511	4.43251	FALSE	7.35584e-08	-0.672511	0.116476	-878.412
SNX2	7.96629e-09	1.34567e-06	-0.706418	1.35537	FALSE	2.99469e-08	-0.706418	0.122447	-518.081
FAM89A	9.37116e-09	1.5424e-06	-2.36769	0.250689	FALSE	1.56572e-09	-2.36769	0.412366	-188.396
AQP3	1.00854e-08	1.61846e-06	-0.959605	0.936639	FALSE	1.70746e-08	-0.959605	0.167491	-448.855
RBP4	1.0605e-08	1.66033e-06	-1.9047	0.402204	FALSE	1.89539e-08	-1.9047	0.332945	-232.359
CDC42	1.22998e-08	1.8361e-06	-0.554779	2.76584	FALSE	9.54268e-08	-0.554779	0.0974062	-729.313
MGST3	1.2062e-08	1.8361e-06	-0.509587	3.50138	FALSE	5.93979e-08	-0.509587	0.0894193	-747.885
PCOLCE2	1.27614e-08	1.86171e-06	-2.36527	0.267218	FALSE	2.47058e-08	-2.36527	0.415745	-198.716
LGALS3BP	1.5709e-08	2.19209e-06	-1.09094	0.752066	FALSE	5.97148e-09	-1.09094	0.192963	-375.527
CEACAM21	1.55848e-08	2.19209e-06	-1.76352	0.0909091	FALSE	0.46254	-1.76352	0.311852	-76.4912
ARL6IP1	2.38485e-08	3.25709e-06	-0.647884	1.70248	FALSE	4.98414e-08	-0.647884	0.116077	-573.055
SERPINA1	2.70086e-08	3.61184e-06	-0.532673	4.69697	FALSE	9.29997e-07	-0.532673	0.095808	-896.398
A2M	3.8915e-08	5.09786e-06	1.13995	1.60606	FALSE	3.10006e-07	1.13995	0.207426	-480.345
IFITM3	4.14619e-08	5.32288e-06	0.690845	2.69972	FALSE	4.35679e-08	0.690845	0.125963	-726.727
RPL3	6.78929e-08	8.54519e-06	0.332095	10.865	FALSE	8.75995e-08	0.332095	0.0615371	-1093.68
CREM	7.18934e-08	8.87469e-06	1.0407	0.570248	FALSE	2.18271e-07	1.0407	0.19321	-363.588
PTPN12	7.43228e-08	9.00147e-06	-1.04735	0.479339	FALSE	3.12245e-07	-1.04735	0.19466	-305.641
RGS1	7.94593e-08	9.44535e-06	1.19793	0.933884	FALSE	5.06956e-08	1.19793	0.223147	-436.462
ACTB	8.109e-08	9.46393e-06	-0.309653	45.5758	FALSE	2.30658e-07	-0.309653	0.0577206	-1581.73
APIP	1.08017e-07	1.23814e-05	-1.13576	0.418733	FALSE	6.81962e-08	-1.13576	0.213783	-274.902
OASL	1.11146e-07	1.25166e-05	-1.38214	0.407713	FALSE	1.03222e-07	-1.38214	0.260414	-262
ALOX5	1.15651e-07	1.27994e-05	-0.838059	0.798898	FALSE	5.29448e-08	-0.838059	0.158117	-398.39
CXCL5	1.28035e-07	1.39298e-05	-1.74195	1.15152	FALSE	6.67996e-08	-1.74195	0.329812	-372.417
TM4SF1	1.42702e-07	1.52667e-05	1.31899	0.779614	FALSE	1.21862e-08	1.31899	0.250677	-355.995
PLA2G16	1.47722e-07	1.55447e-05	-1.00117	0.520661	FALSE	2.6693e-08	-1.00117	0.190505	-304.484
DECR1	1.63251e-07	1.69017e-05	-0.804336	0.798898	FALSE	3.0241e-07	-0.804336	0.153589	-398.116
MGP	1.97453e-07	2.01182e-05	1.12353	1.91185	FALSE	1.18821e-08	1.12353	0.215992	-484.63
RPL35	2.03019e-07	2.03621e-05	0.303713	11.3113	FALSE	1.70548e-07	0.303713	0.058445	-1115.65
NR4A2	2.12731e-07	2.1008e-05	0.810213	1.0303	FALSE	4.26586e-08	0.810213	0.156175	-488.96
IGFBP4	2.29556e-07	2.23261e-05	1.33318	0.559229	FALSE	5.90899e-08	1.33318	0.257686	-276.272
HMGN2	2.4578e-07	2.35472e-05	-0.51569	3.82094	FALSE	2.65424e-08	-0.51569	0.0999228	-812.984
PLA2G7	2.62985e-07	2.4825e-05	1.41521	0.336088	FALSE	1.91714e-09	1.41521	0.274893	-251.664
FABP5	2.80704e-07	2.61136e-05	-0.537243	10.7355	FALSE	2.04521e-09	-0.537243	0.104604	-1169.52
MNDA	2.98373e-07	2.73608e-05	-0.628706	1.53444	FALSE	4.08791e-08	-0.628706	0.122687	-570.107
FCGR2B	3.82796e-07	3.41273e-05	1.12309	0.523416	FALSE	1.27709e-08	1.12309	0.221197	-342.706
RND3	3.82307e-07	3.41273e-05	-2.50552	0.410468	FALSE	5.2336e-09	-2.50552	0.49345	-199.67
GPR183	4.36835e-07	3.84116e-05	0.908807	1.26446	FALSE	2.52577e-07	0.908807	0.179885	-518.659
CORO2A	4.63535e-07	3.91504e-05	-2.63571	0.0633609	FALSE	0.297469	-2.63571	0.522872	-39.4428
RPL13	4.62304e-07	3.91504e-05	0.284125	19.5069	FALSE	2.49747e-07	0.284125	0.0563592	-1294.72
JUNB	4.57952e-07	3.91504e-05	0.496211	5.57851	FALSE	8.14274e-10	0.496211	0.0983932	-954.633
TP53I3	5.65439e-07	4.71371e-05	-0.807594	0.170799	FALSE	0.810295	-0.807594	0.161433	-140.702
UBASH3B	6.63811e-07	5.46282e-05	-1.95586	0.203857	FALSE	4.83395e-09	-1.95586	0.393402	-166.911
GPX3	8.10507e-07	6.51735e-05	1.01092	0.641873	FALSE	1.59981e-07	1.01092	0.204938	-353.037
INHBA	8.12258e-07	6.51735e-05	-1.22759	1.19559	FALSE	7.73321e-08	-1.22759	0.248883	-454.081
ABCG1	8.67497e-07	6.87465e-05	-1.14911	0.410468	FALSE	3.74048e-08	-1.14911	0.23358	-267.467
APOC1	8.98519e-07	7.03365e-05	-0.597568	27.1983	FALSE	4.64854e-08	-0.597568	0.121639	-1497.13
ZNF331	9.47462e-07	7.32742e-05	1.06154	0.705234	FALSE	4.13036e-08	1.06154	0.216541	-394.994
PGD	9.82747e-07	7.50443e-05	-0.817386	0.743802	FALSE	3.00829e-07	-0.817386	0.166982	-400.314
RPL29	9.94851e-07	7.50443e-05	0.337108	7.90909	FALSE	3.14049e-07	0.337108	0.0689008	-1026.75
DDIT4	1.00542e-06	7.50443e-05	1.02329	0.501377	FALSE	9.88321e-08	1.02329	0.209238	-319.978
PEA15	1.06866e-06	7.62193e-05	1.17552	0.294766	FALSE	5.91433e-08	1.17552	0.240958	-239.031
MARCO	1.06538e-06	7.62193e-05	-0.500717	9.32231	FALSE	2.29499e-08	-0.500717	0.102624	-1121.16
RPS4X	1.04371e-06	7.62193e-05	0.321403	9.12397	FALSE	2.01556e-07	0.321403	0.0658178	-1061.88
C15orf48	1.05635e-06	7.62193e-05	0.790866	2.02755	FALSE	3.93076e-08	0.790866	0.162035	-681.487
CTSS	1.53309e-06	0.000108142	-0.389727	5.7741	FALSE	5.9663e-07	-0.389727	0.081077	-949.173
DOCK8	1.66291e-06	0.000114777	-1.26512	0.305785	FALSE	1.79661e-08	-1.26512	0.264085	-237.009
PLBD1	1.66214e-06	0.000114777	-0.793815	0.680441	FALSE	1.81601e-07	-0.793815	0.1657	-372.196
CXCL16	1.72412e-06	0.000117736	-0.548397	1.53168	FALSE	6.8675e-07	-0.548397	0.114647	-563.999
VSIG4	2.02847e-06	0.00013706	-0.526112	4.17631	FALSE	2.80226e-08	-0.526112	0.110747	-851.279
MYL6	2.12094e-06	0.000140354	-0.275189	15.0413	FALSE	5.27183e-08	-0.275189	0.0580378	-1186.13
RPL13A	2.12016e-06	0.000140354	0.274681	18.719	FALSE	1.76051e-07	0.274681	0.0579299	-1287.63
NOP10	2.2976e-06	0.000150493	-0.421199	3.58953	FALSE	8.56164e-08	-0.421199	0.0891366	-786.54
ACTG1	2.4831e-06	0.000161	-0.33279	10.6667	FALSE	3.82568e-08	-0.33279	0.0706634	-1100.5
RPS9	2.6164e-06	0.000167947	0.288123	11.3444	FALSE	5.6914e-07	0.288123	0.0613178	-1124.96
FCGR3A	2.7887e-06	0.000177234	-0.634865	1.44904	FALSE	3.30792e-08	-0.634865	0.135487	-569.838
CEBPB	3.32415e-06	0.000209193	-0.501791	3.07438	FALSE	3.77882e-08	-0.501791	0.107919	-793.016
APTX	3.42256e-06	0.000213295	-1.4081	0.0743802	FALSE	0.252621	-1.4081	0.30323	0
PRCP	3.52286e-06	0.000215467	0.889717	0.396694	FALSE	5.14605e-08	0.889717	0.191844	-267.076
NR4A1	3.52454e-06	0.000215467	0.701024	0.922865	FALSE	1.23114e-08	0.701024	0.151161	-457.877
CYBA	5.55833e-06	0.000336594	-0.273206	13.5372	FALSE	9.33052e-07	-0.273206	0.0601441	-1176.85
CLEC5A	5.91219e-06	0.000354676	1.3324	0.212121	FALSE	3.72747e-08	1.3324	0.29416	-200.389
FPR2	6.03247e-06	0.000358541	-1.15568	0.374656	FALSE	1.36686e-07	-1.15568	0.255384	-275.652
PRSS23	6.11627e-06	0.000360187	1.5901	0.231405	FALSE	6.22633e-09	1.5901	0.351611	-159.997
SDS	6.23471e-06	0.000363824	2.00573	0.187328	FALSE	1.68092e-08	2.00573	0.443916	-155.655
SPOCD1	6.31665e-06	0.000365285	-1.73813	0.203857	FALSE	2.88511e-08	-1.73813	0.384924	-178.952
CDKN1A	6.46314e-06	0.000370419	0.733777	0.738292	FALSE	2.34497e-08	0.733777	0.162677	-393.297
RPS7	6.73293e-06	0.000379744	0.30048	6.3168	FALSE	4.34307e-07	0.30048	0.0667442	-926.029
PNPLA6	6.74416e-06	0.000379744	-1.04318	0.385675	FALSE	4.70898e-07	-1.04318	0.231735	-282.491
CLEC10A	7.18229e-06	0.000400897	2.44182	0.134986	FALSE	1.59462e-09	2.44182	0.544051	-118.003
RPS18	7.96507e-06	0.000440757	0.26275	22.135	FALSE	2.3572e-08	0.26275	0.0588319	-1353.61
MRC1	8.37356e-06	0.0004594	-0.466116	3.08264	FALSE	9.25928e-07	-0.466116	0.104618	-792.526
RP5-839B4.8	8.66615e-06	0.000471424	-2.1181	0.14876	FALSE	4.14561e-08	-2.1181	0.476188	-137.605
SCGB3A2	8.83213e-06	0.000476416	1.1341	0.936639	FALSE	4.08499e-08	1.1341	0.255201	-345.032
ARMC1	9.29257e-06	0.000497075	-1.02688	0.0853994	FALSE	0.444977	-1.02688	0.231644	-9.82014
HPGD	1.01585e-05	0.000538904	-1.42991	0.280992	FALSE	6.59692e-08	-1.42991	0.323966	-217.116
PHLDA3	1.03149e-05	0.000542716	-0.958216	0.446281	FALSE	2.11674e-07	-0.958216	0.21726	-275.645
DERL1	1.06077e-05	0.000553586	-0.915808	0.371901	FALSE	3.1737e-07	-0.915808	0.20793	-258.05
CLU	1.09628e-05	0.000567502	1.15362	0.603306	FALSE	3.27991e-08	1.15362	0.262351	-290.447
PLAC8	1.13499e-05	0.000581532	-1.96725	0.269972	FALSE	9.66437e-09	-1.96725	0.448149	-191.948
EVL	1.1415e-05	0.000581532	-0.778128	0.683196	FALSE	4.38123e-08	-0.778128	0.177312	-376.8
ADIRF	1.16929e-05	0.000590998	0.973439	0.721763	FALSE	6.30199e-08	0.973439	0.222082	-341.76
H3F3B	1.27724e-05	0.000640516	0.291429	10.9036	FALSE	2.69303e-07	0.291429	0.0667808	-1140.21
CD14	1.30424e-05	0.000648986	0.635979	3.03857	FALSE	1.37814e-08	0.635979	0.145887	-786.822
MT-CO3	1.33087e-05	0.000657141	-0.297395	37.9807	FALSE	1.0214e-07	-0.297395	0.0682887	-1604.8
SNHG15	1.3554e-05	0.000664148	1.01434	0.297521	FALSE	3.93313e-07	1.01434	0.233129	-236.645
PTPMT1	1.39254e-05	0.000673062	-0.836442	0.46281	FALSE	2.55154e-07	-0.836442	0.192505	-293.703
APOL6	1.39457e-05	0.000673062	-1.15115	0.247934	FALSE	9.34851e-08	-1.15115	0.264954	-204.081
RPL8	1.4209e-05	0.000680653	0.257831	13.0248	FALSE	2.94828e-07	0.257831	0.0593998	-1165.58
LYAR	1.46925e-05	0.000692899	-0.808156	0.597796	FALSE	8.58859e-08	-0.808156	0.186501	-359.222
MALAT1	1.46841e-05	0.000692899	0.358411	164.942	FALSE	6.99725e-08	0.358411	0.0827094	-2183.44
RPS17	1.47885e-05	0.000692899	0.294465	9.13499	FALSE	3.56895e-07	0.294465	0.0679773	-1076.05
RPL35A	1.50922e-05	0.000697635	0.287224	8.87328	FALSE	2.71133e-08	0.287224	0.0663743	-1066.05
GLRX	1.51069e-05	0.000697635	-0.548307	1.52066	FALSE	2.19926e-08	-0.548307	0.126714	-560.378
SVIL	1.66652e-05	0.000764101	-1.40492	0.209366	FALSE	3.70195e-08	-1.40492	0.326313	-185.286
ACOT7	1.70875e-05	0.000772428	-1.06971	0.347107	FALSE	6.60694e-09	-1.06971	0.248775	-246.451
AKR1C3	1.70637e-05	0.000772428	-1.71566	0.22865	FALSE	2.61487e-08	-1.71566	0.398971	-174.988
TPM1	1.72671e-05	0.000775087	1.03785	0.352617	FALSE	2.04189e-08	1.03785	0.241495	-249.141
TFRC	1.74838e-05	0.000779363	-0.688467	1.33609	FALSE	9.54179e-08	-0.688467	0.160302	-550.447
CHMP1B	1.78772e-05	0.000791405	0.728704	0.752066	FALSE	7.20376e-07	0.728704	0.169866	-434.903
ARPC2	1.80605e-05	0.000794045	-0.292469	5.81543	FALSE	1.228e-07	-0.292469	0.0682126	-884.333
RPS12	1.82075e-05	0.00079506	0.260451	14.8623	FALSE	1.23899e-07	0.260451	0.0607705	-1222.99
SLC2A3	1.89238e-05	0.000815247	0.535734	1.25344	FALSE	3.49297e-07	0.535734	0.125253	-538.439
TUBA1A	1.88394e-05	0.000815247	0.575974	1.33884	FALSE	2.77913e-08	0.575974	0.134629	-532.931
HNMT	2.10658e-05	0.000895504	-0.62568	0.820937	FALSE	2.53645e-07	-0.62568	0.147105	-424.71
CALD1	2.10044e-05	0.000895504	1.25472	0.650138	FALSE	7.98296e-08	1.25472	0.294954	-300.354
RPL10	2.14847e-05	0.000907306	0.239745	27.6804	FALSE	5.09742e-08	0.239745	0.0564256	-1427.89
RHOC	2.17631e-05	0.000913056	0.764979	0.564738	FALSE	1.1505e-07	0.764979	0.180165	-345.716
SPN	2.27597e-05	0.000948667	-0.651909	0.707989	FALSE	1.5838e-07	-0.651909	0.1539	-390.302
PTPN7	2.41054e-05	0.000998274	2.35505	0.0936639	FALSE	1.06355e-07	2.35505	0.557671	-102.959
SCD	2.75297e-05	0.00113278	-1.30718	0.261708	FALSE	8.91088e-11	-1.30718	0.311754	-198.916
SCP2	2.93587e-05	0.00120034	-0.585097	0.831956	FALSE	1.86603e-07	-0.585097	0.140029	-423.337
TMEM53	3.03037e-05	0.00123114	-1.23993	0.231405	FALSE	4.7355e-08	-1.23993	0.297263	-198.03
LPCAT3	3.2765e-05	0.00132276	-0.801841	0.104683	FALSE	0.569913	-0.801841	0.193059	-97.936
CAP1	3.49303e-05	0.00140136	-0.424927	1.88705	FALSE	4.39623e-07	-0.424927	0.102672	-609.496
H2AFZ	3.70481e-05	0.00147709	-0.472576	3.25344	FALSE	1.3819e-08	-0.472576	0.114559	-717.934
RPS8	3.76502e-05	0.00148564	0.251324	15.3691	FALSE	1.85527e-08	0.251324	0.0609795	-1229.75
MGST1	3.77255e-05	0.00148564	-0.780412	0.955923	FALSE	1.05098e-07	-0.780412	0.189375	-430.265
NEDD9	3.83322e-05	0.00150033	1.02107	0.319559	FALSE	2.04365e-08	1.02107	0.247994	-251.747
PEBP1	3.90101e-05	0.00151761	-0.469072	1.4022	FALSE	6.91582e-07	-0.469072	0.114039	-523.24
RGS5	3.98499e-05	0.00154094	2.08787	0.201102	FALSE	6.39895e-09	2.08787	0.508203	-130.58
LCP1	4.09077e-05	0.00157237	-0.511663	1.38843	FALSE	9.77924e-07	-0.511663	0.124726	-571.225
MACC1	4.61389e-05	0.00176289	-2.48375	0.118457	FALSE	4.77972e-08	-2.48375	0.609604	-121.206
RPS28	4.70027e-05	0.00178527	0.21988	17.2837	FALSE	1.18938e-06	0.21988	0.0540239	-1244.48
TCF4	4.89527e-05	0.0018484	1.24538	0.220386	FALSE	7.78098e-08	1.24538	0.3067	-171.223
CARD16	4.95905e-05	0.00186153	-0.66896	0.746556	FALSE	5.87918e-07	-0.66896	0.164868	-411.258
CSTA	5.09096e-05	0.00188895	-0.580193	1.34711	FALSE	1.11179e-07	-0.580193	0.143208	-563.516
DCN	5.07014e-05	0.00188895	1.25039	1.13223	FALSE	3.81238e-09	1.25039	0.308557	-300.457
CAV1	5.18144e-05	0.00191147	1.24245	0.352617	FALSE	2.07553e-08	1.24245	0.306982	-223.807
ABRACL	5.38003e-05	0.00197339	-0.595459	0.807163	FALSE	8.43922e-08	-0.595459	0.147447	-416.106
RP11-284N8.3	5.49351e-05	0.00200357	-1.07779	0.0661157	FALSE	0.312225	-1.07779	0.267204	0
RPL26	5.66397e-05	0.00205407	0.280469	13.4545	FALSE	1.67301e-08	0.280469	0.0696576	-1231.29
ZFP36L1	5.86415e-05	0.00211472	0.532768	1.68595	FALSE	6.15696e-08	0.532768	0.132588	-638.04
PTRF	5.92153e-05	0.00212348	1.36206	0.176309	FALSE	2.43261e-08	1.36206	0.339165	-149.31
FN1	6.18304e-05	0.00218634	-0.578285	6.76033	FALSE	4.00232e-09	-0.578285	0.144365	-1011.28
SERPINB9	6.21593e-05	0.00218634	1.51374	0.143251	FALSE	2.93985e-09	1.51374	0.378013	-132.357
DCTN3	6.23306e-05	0.00218634	-0.619461	0.69146	FALSE	1.01353e-07	-0.619461	0.154718	-359.03
APOL1	6.17066e-05	0.00218634	-1.12325	0.0661157	FALSE	0.372225	-1.12325	0.280379	-24.076
GLIPR2	6.27637e-05	0.00218957	-0.39871	2.2865	FALSE	8.22208e-08	-0.39871	0.0996233	-679.053
SGMS2	6.41588e-05	0.00222614	-1.05628	0.280992	FALSE	7.12681e-08	-1.05628	0.264271	-230.845
DDX39B	6.54337e-05	0.00224609	-0.904766	0.077135	FALSE	0.432333	-0.904766	0.226627	-98.1984
CTSD	6.52615e-05	0.00224609	-0.345682	17.4408	FALSE	5.50861e-08	-0.345682	0.0865734	-1342.35
CTSK	6.9672e-05	0.00236627	2.09586	0.143251	FALSE	9.97615e-09	2.09586	0.526941	-122.513
SPI1	6.93505e-05	0.00236627	-0.40235	2.11846	FALSE	7.64164e-08	-0.40235	0.101131	-644.683
RPS6	7.06397e-05	0.00238651	0.249882	13.2452	FALSE	1.60374e-07	0.249882	0.0628772	-1185.73
VAPA	7.15506e-05	0.00240462	-0.447833	1.55647	FALSE	8.62458e-07	-0.447833	0.112774	-581.653
HACD4	7.30911e-05	0.0024436	-0.869909	0.402204	FALSE	3.57597e-07	-0.869909	0.219342	-285.182
RPLP2	7.4467e-05	0.0024767	0.218921	17.1956	FALSE	2.7625e-07	0.218921	0.0552616	-1248.56
ATP6V0E1	7.7942e-05	0.00257892	-0.319413	3.03306	FALSE	1.10917e-07	-0.319413	0.0808509	-713.165
BIRC3	8.05992e-05	0.00265316	1.1045	0.275482	FALSE	1.42292e-08	1.1045	0.280145	-218.218
TPPP3	8.29333e-05	0.00271606	1.27767	0.198347	FALSE	5.78756e-08	1.27767	0.324631	-167.667
CLN8	8.3921e-05	0.00273446	0.911056	0.272727	FALSE	7.31657e-08	0.911056	0.231649	-215.224
MYL9	8.50262e-05	0.00275648	0.811115	1.11846	FALSE	7.25766e-08	0.811115	0.206403	-440.219
MINOS1	9.01039e-05	0.00290155	-0.427696	1.81267	FALSE	8.25515e-07	-0.427696	0.109223	-620.659
CXCR4	9.04049e-05	0.00290155	0.697297	1.49036	FALSE	1.01661e-07	0.697297	0.178109	-576.936
KCNMA1	9.12149e-05	0.00291298	-1.66612	0.137741	FALSE	2.01978e-08	-1.66612	0.425807	-133.633
PTGDS	9.28694e-05	0.00295113	1.21089	0.84022	FALSE	2.48883e-08	1.21089	0.309809	-284.988
RPL36A	9.46627e-05	0.00297863	0.355865	3.29477	FALSE	6.06452e-08	0.355865	0.0911566	-802.475
FOSB	9.4262e-05	0.00297863	0.435427	2.97245	FALSE	1.3309e-07	0.435427	0.111508	-781.794
RPL30	9.99207e-05	0.00311836	0.262852	7.81267	FALSE	5.63477e-08	0.262852	0.0675577	-1020.56
PLAC9	0.000100075	0.00311836	1.38259	0.280992	FALSE	2.17649e-08	1.38259	0.355383	-176.06
HLA-C	0.000101156	0.0031368	-0.266751	8.5978	FALSE	8.75786e-08	-0.266751	0.0686123	-1029.01
ADAMTSL4	0.000108586	0.00330235	-0.834075	0.355372	FALSE	2.74709e-07	-0.834075	0.215492	-272.869
IER3	0.000108462	0.00330235	0.678453	1.36915	FALSE	8.93766e-08	0.678453	0.175273	-547.621
CD164	0.000107718	0.00330235	-0.468484	1.43251	FALSE	9.92764e-08	-0.468484	0.120977	-550.657
PPIF	0.000109067	0.00330235	0.847531	0.38292	FALSE	6.19158e-07	0.847531	0.21903	-287.083
CLEC12A	0.000108789	0.00330235	-0.863819	0.446281	FALSE	1.13171e-08	-0.863819	0.223203	-311.48
TIMP3	0.000110354	0.00332564	1.16618	0.37741	FALSE	2.82339e-08	1.16618	0.301603	-215.752
2011-09-01	0.000111573	0.00334668	-0.702588	0.534435	FALSE	3.37079e-07	-0.702588	0.181832	-312.052
C10orf10	0.000114471	0.00341763	1.0493	0.454545	FALSE	1.71558e-08	1.0493	0.272003	-276.634
SLC7A7	0.000129155	0.00382571	-0.613347	0.730028	FALSE	2.48446e-07	-0.613347	0.160224	-392.49
MATK	0.000129331	0.00382571	1.28325	0.170799	FALSE	7.93913e-08	1.28325	0.335252	-168.058
PPBP	0.000130802	0.00385146	-2.88019	0.911846	FALSE	7.58463e-08	-2.88019	0.753003	-155.131
SERPINF1	0.000133521	0.00391356	1.23793	0.369146	FALSE	5.98081e-08	1.23793	0.324077	-200.013
ARL4C	0.000136827	0.00397418	0.991116	0.322314	FALSE	7.5287e-08	0.991116	0.259874	-242.112
TANGO2	0.000136713	0.00397418	-1.18364	0.0550964	FALSE	0.236244	-1.18364	0.310337	-5.10826
PLXND1	0.000143628	0.00414316	1.47476	0.115702	FALSE	1.0929e-08	1.47476	0.387907	-116.958
TMBIM6	0.000143936	0.00414316	-0.346045	2.67769	FALSE	1.21866e-06	-0.346045	0.0910333	-708.885
MBP	0.000149075	0.00427194	0.463461	0.220386	FALSE	1.29264	0.463461	0.122201	-221.923
MTMR11	0.000154796	0.00438192	-1.79171	0.123967	FALSE	2.21357e-08	-1.79171	0.473591	-128.828
PNISR	0.000154961	0.00438192	0.763375	0.418733	FALSE	6.60771e-07	0.763375	0.201792	-308.097
TSPAN3	0.000154811	0.00438192	-0.894162	0.256198	FALSE	0.244897	-0.894162	0.236349	-91.1267
SERGEF	0.000157646	0.00443829	0.832838	0.077135	FALSE	0.530092	0.832838	0.220403	-27.2803
CNN3	0.000159123	0.0044603	1.33034	0.209366	FALSE	5.5034e-08	1.33034	0.352279	-157.281
BLVRA	0.000161551	0.00448917	-0.560516	0.705234	FALSE	2.20515e-07	-0.560516	0.148575	-374.467
NFIB	0.000161092	0.00448917	1.75004	0.132231	FALSE	9.37808e-08	1.75004	0.463794	-117.717
MARCKS	0.000164154	0.00454182	0.882157	0.347107	FALSE	2.34117e-08	0.882157	0.23408	-251.485
NDUFB1	0.000170571	0.00469913	-0.350441	2.6584	FALSE	1.51131e-06	-0.350441	0.0932262	-712.672
DAAM1	0.000174211	0.00477889	1.63712	0.112948	FALSE	7.28291e-09	1.63712	0.43613	-107.524
ABCG2	0.000181372	0.00495417	-2.08613	0.118457	FALSE	6.34672e-08	-2.08613	0.557246	-113.722
RDH14	0.000184004	0.00498364	-0.913759	0.077135	FALSE	0.377894	-0.913759	0.244319	-53.3892
RPL37A	0.000183752	0.00498364	0.210495	13.0523	FALSE	6.18259e-07	0.210495	0.0562767	-1146.24
FBXL5	0.000185815	0.00501155	-1.01702	0.289256	FALSE	7.20352e-08	-1.01702	0.272107	-230.132
GPD1	0.000191298	0.00511722	-2.78911	0.121212	FALSE	8.30678e-10	-2.78911	0.747704	-103.91
FTL	0.000191328	0.00511722	-0.282497	232.468	FALSE	9.98292e-08	-0.282497	0.0757324	-2241.24
PDE4B	0.000194486	0.0051801	1.16197	0.176309	FALSE	5.73593e-08	1.16197	0.311849	-160.763
CRYAB	0.000204972	0.00543685	1.98305	0.157025	FALSE	1.26542e-08	1.98305	0.534111	-114.134
ACER3	0.000211416	0.0055847	-0.780971	0.374656	FALSE	5.52099e-08	-0.780971	0.21079	-269.784
TAF7	0.000220092	0.00579004	0.766691	0.366391	FALSE	3.27629e-07	0.766691	0.207507	-278.518
HPS5	0.000222674	0.00583405	-1.01688	0.0716253	FALSE	0.342742	-1.01688	0.275442	-38.0617
INSIG1	0.00022631	0.00590522	0.800957	0.512397	FALSE	8.54753e-08	0.800957	0.217198	-343.328
AGFG1	0.000230493	0.00599001	-1.03413	0.242424	FALSE	1.18543e-08	-1.03413	0.280783	-210.952
FDFT1	0.000238906	0.00618363	-0.990371	0.206612	FALSE	0.334913	-0.990371	0.269572	-12.1365
HSD17B11	0.000243825	0.0062856	-0.581874	0.774105	FALSE	1.0062e-07	-0.581874	0.158607	-405.847
SEPP1	0.000246928	0.00634013	1.40213	0.316804	FALSE	1.41049e-08	1.40213	0.382528	-172.069
SELK	0.000249548	0.00635655	0.454599	1.43802	FALSE	1.0872e-07	0.454599	0.124115	-577.22
RETN	0.000248761	0.00635655	-0.563117	4.05785	FALSE	4.38788e-08	-0.563117	0.153709	-871.536
RPSA	0.000251048	0.00636946	0.286554	4.72176	FALSE	2.54046e-07	0.286554	0.078268	-866.635
GLDN	0.000264003	0.00667179	-3.00697	0.107438	FALSE	3.06813e-08	-3.00697	0.824215	-101.814
RPL24	0.000268752	0.00675549	0.279181	4.90634	FALSE	8.15401e-08	0.279181	0.0766202	-893.015
SLC25A37	0.00026942	0.00675549	1.05858	0.192837	FALSE	4.45745e-07	1.05858	0.290576	-187.105
C1orf162	0.000274517	0.00681125	-0.358666	3.05785	FALSE	3.39505e-07	-0.358666	0.0985824	-763.357
LMCD1	0.000274209	0.00681125	1.53856	0.112948	FALSE	3.47625e-10	1.53856	0.422854	-109.443
HP	0.000274827	0.00681125	-2.58638	0.162534	FALSE	1.79466e-08	-2.58638	0.710947	-110.594
PDCD6IP	0.000279877	0.00690429	-0.859449	0.333333	FALSE	3.45746e-08	-0.859449	0.236551	-265.439
SAMHD1	0.000280732	0.00690429	-0.473799	1.17631	FALSE	1.34001e-07	-0.473799	0.130435	-512.79
ARL4A	0.000283633	0.00692942	-0.501653	1.25344	FALSE	1.90878e-08	-0.501653	0.138204	-537.848
HERPUD1	0.000283913	0.00692942	0.537538	1.02755	FALSE	4.18811e-08	0.537538	0.1481	-499.471
CAMK1	0.00029056	0.0070648	1.06953	0.209366	FALSE	3.2713e-08	1.06953	0.29516	-191.006
EIF2B3	0.000310077	0.00751089	-0.758525	0.0936639	FALSE	0.439967	-0.758525	0.210308	-0.185784
RPS3	0.000316198	0.00763035	0.223047	10.4463	FALSE	3.1557e-07	0.223047	0.0619291	-1094.72
CYB561D2	0.000324946	0.0078121	-0.970366	0.203857	FALSE	0.198886	-0.970366	0.269954	-74.8998
PHPT1	0.000329558	0.00789341	0.456736	1.0854	FALSE	1.35837e-06	0.456736	0.127193	-493.802
SLC25A46	0.00033117	0.00790253	-1.47223	0.129477	FALSE	9.82399e-08	-1.47223	0.410137	-136.713
CAV2	0.000332928	0.00791505	2.23676	0.0716253	FALSE	1.66688e-08	2.23676	0.623359	-75.6675
BHLHE41	0.000340117	0.00802651	-0.988138	0.410468	FALSE	1.06974e-08	-0.988138	0.275812	-268.528
RPS5	0.000339224	0.00802651	0.234852	7.44077	FALSE	2.83425e-07	0.234852	0.0655399	-979.679
TREM1	0.000346429	0.00814553	-0.43317	1.74656	FALSE	1.16212e-08	-0.43317	0.12107	-604.4
THBS1	0.000349609	0.00819028	-0.769477	0.862259	FALSE	3.96472e-08	-0.769477	0.215211	-432.699
AMIGO2	0.000351491	0.00820444	-1.73847	0.104683	FALSE	2.53835e-08	-1.73847	0.486413	-113.004
MT1F	0.000358535	0.00833854	-0.918867	0.471074	FALSE	3.4337e-08	-0.918867	0.257468	-321.423
COQ2	0.000369139	0.00855416	-0.997549	0.217631	FALSE	1.42839e-08	-0.997549	0.280115	-187.816
EFHD2	0.000377908	0.00872586	-0.474094	1.19008	FALSE	6.32877e-08	-0.474094	0.133358	-516.02
RPL41	0.000383289	0.00881839	0.17942	24.449	FALSE	1.34828e-07	0.17942	0.050522	-1341.41
HADH	0.000385381	0.00883486	-1.10934	0.176309	FALSE	1.33301e-07	-1.10934	0.312499	-161.13
HM13	0.000387813	0.00885897	0.607855	0.553719	FALSE	6.87794e-07	0.607855	0.171312	-349.223
SPRY1	0.000390445	0.00888747	1.15136	0.454545	FALSE	3.10884e-09	1.15136	0.324651	-247.548
MFSD14B	0.000414197	0.0093948	-0.974166	0.209366	FALSE	2.34786e-07	-0.974166	0.2759	-181.444
TCF7L2	0.000416903	0.00942289	-0.7564	0.407713	FALSE	3.0155e-07	-0.7564	0.21433	-296.591
RPL7	0.000419414	0.00944639	0.237068	11.4848	FALSE	2.17925e-07	0.237068	0.0672047	-1156.04
TINAGL1	0.000423282	0.00950016	1.77535	0.112948	FALSE	1.83227e-08	1.77535	0.503628	-105.099
KCNN4	0.000427869	0.00956965	1.15947	0.151515	FALSE	1.15309e-07	1.15947	0.329181	-155.908
LDHB	0.000442925	0.009872	-0.46624	1.12672	FALSE	1.76503e-08	-0.46624	0.132715	-472.28
ZNF385A	0.00046361	0.0102973	1.07396	0.165289	FALSE	1.73652e-07	1.07396	0.306762	-175.887
DUSP2	0.000466558	0.010327	0.609699	0.99449	FALSE	1.50669e-07	0.609699	0.174237	-484.482
PLPP3	0.000468714	0.0103296	1.11466	0.225895	FALSE	3.48684e-08	1.11466	0.318653	-171.771
EMP3	0.000469891	0.0103296	0.31388	6.92562	FALSE	8.66765e-08	0.31388	0.0897479	-1059.76
RPS29	0.000474195	0.0103886	0.194906	23.2397	FALSE	1.44375e-07	0.194906	0.0557682	-1365.23
PHF5A	0.00047847	0.0104466	-1.23221	0.151515	FALSE	4.37257e-08	-1.23221	0.352813	-152.408
OLR1	0.000482626	0.0105016	-0.356442	3.44353	FALSE	2.61533e-07	-0.356442	0.102126	-833.901
LUM	0.000492488	0.01068	1.14198	1.37741	FALSE	1.22119e-08	1.14198	0.327701	-313.156
RPL39	0.000495753	0.0107146	0.211425	18.314	FALSE	6.22384e-08	0.211425	0.0607013	-1313.2
RPL32	0.000513504	0.0110223	0.201408	16.416	FALSE	2.22137e-07	0.201408	0.0579824	-1250.03
RPS15A	0.000512133	0.0110223	0.223019	12.7576	FALSE	1.01946e-07	0.223019	0.0641906	-1186.47
MSL1	0.000515139	0.0110223	-0.706862	0.0936639	FALSE	0.490963	-0.706862	0.203545	-88.8421
SGK1	0.000518345	0.011054	0.541359	1.37741	FALSE	1.97583e-07	0.541359	0.155962	-576.645
RPL10A	0.000547284	0.0116325	0.242307	7.29477	FALSE	1.09417e-08	0.242307	0.0701022	-996.714
IFI16	0.000550923	0.0116328	0.593968	0.716253	FALSE	1.09812e-08	0.593968	0.171931	-394.903
CCL18	0.000549859	0.0116328	-0.670457	19.4077	FALSE	9.44855e-08	-0.670457	0.194042	-1206.02
SFTPB	0.000552745	0.011633	1.28355	0.391185	FALSE	9.44414e-08	1.28355	0.371633	-205.752
IGLC2	0.000554692	0.0116358	0.451773	1.41047	FALSE	4.40881e-07	0.451773	0.130841	-586.278
EML4	0.000566996	0.0118552	-0.589737	0.630854	FALSE	3.98473e-08	-0.589737	0.17109	-369.689
VPS29	0.00057157	0.011912	-0.355508	1.82369	FALSE	1.90742e-07	-0.355508	0.103203	-587.839
MAN1A1	0.000583311	0.0121174	-0.91809	0.247934	FALSE	5.29062e-08	-0.91809	0.266944	-207.883
RPL11	0.000599167	0.0124066	0.213501	15.2314	FALSE	1.44778e-07	0.213501	0.062209	-1244.06
SNX24	0.000609098	0.0125314	-1.88553	0.0909091	FALSE	2.15301e-08	-1.88553	0.550113	-103.845
PRDX2	0.000608083	0.0125314	0.741433	0.333333	FALSE	1.10821e-08	0.741433	0.216289	-237.984
PTTG1	0.000619968	0.0126336	-1.49051	0.267218	FALSE	2.42578e-09	-1.49051	0.435474	-164.955
CEBPD	0.000616366	0.0126336	0.552526	1.42975	FALSE	1.06466e-08	0.552526	0.161354	-548.489
TCEB2	0.000618203	0.0126336	-0.273968	4.77961	FALSE	1.33551e-07	-0.273968	0.0800256	-886.287
SLC35E3	0.000627267	0.0127017	-0.904637	0.121212	FALSE	0.217988	-0.904637	0.264549	0
AP001055.6	0.000626621	0.0127017	1.47807	0.101928	FALSE	9.3203e-09	1.47807	0.432206	-120.698
RTN3	0.000633746	0.0127925	-0.482764	0.84022	FALSE	3.76279e-07	-0.482764	0.141294	-414.671
RPS3A	0.000640629	0.0128909	0.219712	11.5785	FALSE	1.21389e-07	0.219712	0.0643599	-1143.33
CD58	0.000652603	0.0130908	-0.518638	0.69697	FALSE	4.50698e-07	-0.518638	0.152149	-385.65
CFH	0.000661209	0.0132221	1.41595	0.214876	FALSE	1.14234e-08	1.41595	0.415822	-138.47
EED	0.000664177	0.0132402	-0.835226	0.0853994	FALSE	0.35097	-0.835226	0.245369	-36.4546
DESI1	0.000677913	0.0134722	-1.00525	0.173554	FALSE	5.12267e-06	-1.00525	0.295804	-156.182
NFKB2	0.00068232	0.0135179	1.1385	0.126722	FALSE	4.96267e-07	1.1385	0.335189	-133.2
G0S2	0.000687806	0.0135609	1.13896	0.977961	FALSE	1.18276e-07	1.13896	0.335541	-358.189
ATG7	0.000688714	0.0135609	-1.22694	0.143251	FALSE	1.80985e-07	-1.22694	0.361499	-149.823
SNX3	0.000691407	0.0135665	-0.303325	2.66942	FALSE	4.98317e-08	-0.303325	0.0893983	-679.061
AQP1	0.000693223	0.0135665	0.972612	0.22314	FALSE	9.98986e-08	0.972612	0.286716	-186.021
IL10	0.00069829	0.0136046	1.49602	0.134986	FALSE	2.03867e-07	1.49602	0.441271	-139.965
CASP7	0.000699413	0.0136046	-1.15068	0.157025	FALSE	3.5349e-07	-1.15068	0.339452	-163.186
CRIP2	0.00070298	0.0136327	0.725016	0.46832	FALSE	6.3493e-09	0.725016	0.213969	-309.287
LTB	0.000710664	0.0137402	0.912055	0.269972	FALSE	2.28951e-08	0.912055	0.269406	-233.851
ITGB8	0.000719195	0.0138236	-2.23524	0.0909091	FALSE	2.86825e-09	-2.23524	0.660891	-98.6581
RPL18A	0.000719284	0.0138236	0.197922	12.9146	FALSE	8.01862e-07	0.197922	0.0585202	-1156.29
FLVCR2	0.000724969	0.0138913	-1.03168	0.165289	FALSE	0.0684402	-1.03168	0.305234	0
CRIP1	0.000732245	0.0139889	-0.315586	7.02479	FALSE	4.69894e-08	-0.315586	0.0934456	-1049.85
CFLAR	0.000739546	0.0140865	0.590437	0.476584	FALSE	7.53155e-07	0.590437	0.174971	-324.162
MRPL44	0.00075832	0.0143701	-1.29322	0.137741	FALSE	1.55838e-07	-1.29322	0.38402	-144.693
FHL1	0.000758914	0.0143701	-0.807664	0.418733	FALSE	6.71356e-09	-0.807664	0.239851	-276.187
TXNIP	0.000764695	0.014437	-0.352289	3.84848	FALSE	5.89236e-07	-0.352289	0.104684	-875.221
SFRP2	0.000775248	0.0145933	1.72798	0.253444	FALSE	2.15242e-08	1.72798	0.514054	-129.584
FBLN1	0.000782397	0.0146848	1.20343	0.426997	FALSE	3.77649e-08	1.20343	0.358276	-197.204
SLC27A3	0.000787144	0.0147308	-0.840638	0.305785	FALSE	2.601e-09	-0.840638	0.250393	-233.308
C1D	0.000793742	0.0148111	-0.681149	0.363636	FALSE	6.55338e-07	-0.681149	0.203027	-268.843
PLTP	0.000810706	0.0150838	1.02318	0.278237	FALSE	7.1257e-08	1.02318	0.305507	-201.856
TBC1D10C	0.000816625	0.0151064	-1.12135	0.190083	FALSE	5.27836e-08	-1.12135	0.33502	-175.839
LTN1	0.0008164	0.0151064	-0.93287	0.0578512	FALSE	0.38272	-0.93287	0.278704	-14.032
MDH1	0.000852851	0.0157158	-0.468892	1.09642	FALSE	2.48089e-08	-0.468892	0.140595	-476.356
RPS24	0.000854468	0.0157158	0.222915	12.0661	FALSE	3.86534e-07	0.222915	0.0668506	-1187.13
NNMT	0.00086575	0.0158778	0.760146	0.595041	FALSE	6.89033e-08	0.760146	0.228212	-320.899
CEBPA	0.000874347	0.0159898	-1.14102	0.165289	FALSE	4.94532e-08	-1.14102	0.342842	-162.323
MIR3945HG	0.000886975	0.0161747	-0.60641	0.909091	FALSE	2.94907e-08	-0.60641	0.182427	-448.276
KAT6A	0.000902004	0.0163558	1.23012	0.112948	FALSE	4.40741e-07	1.23012	0.370582	-127.239
KAT8	0.000900009	0.0163558	-0.746424	0.325069	FALSE	3.71298e-07	-0.746424	0.224823	-257.397
RAC1	0.000912599	0.0164178	-0.223938	5.58953	FALSE	7.01935e-07	-0.223938	0.0675292	-887.137
C8orf4	0.000908301	0.0164178	1.18911	0.22314	FALSE	2.09002e-08	1.18911	0.358435	-169.956
LIMD2	0.000913093	0.0164178	0.867509	0.214876	FALSE	8.98607e-08	0.867509	0.261612	-202.483
CTSW	0.000918979	0.0164774	-1.45676	0.115702	FALSE	8.51871e-08	-1.45676	0.439548	-123.249
CLDN5	0.000922377	0.0164923	1.10962	0.245179	FALSE	2.316e-08	1.10962	0.334909	-181.319
S100A4	0.000929311	0.0165283	-0.252719	20.6281	FALSE	1.27194e-08	-0.252719	0.076325	-1400.72
LHFP	0.000929542	0.0165283	1.4444	0.157025	FALSE	7.3545e-09	1.4444	0.43624	-129.948
RAMP3	0.000932836	0.0165411	1.27349	0.15427	FALSE	1.01175e-08	1.27349	0.384736	-149.651
GALC	0.00093731	0.0165746	-1.16162	0.140496	FALSE	2.8277e-08	-1.16162	0.351081	-143.11
RMDN3	0.000954812	0.0168377	-0.712842	0.460055	FALSE	6.03875e-08	-0.712842	0.215783	-285.238
PECAM1	0.00096508	0.0169265	-0.552301	0.600551	FALSE	3.68144e-07	-0.552301	0.167338	-350.095
KDSR	0.000965117	0.0169265	-0.834426	0.236915	FALSE	1.03755e-07	-0.834426	0.252818	-192.484
PLAUR	0.00101331	0.0177233	0.352028	3.21212	FALSE	4.67144e-08	0.352028	0.107103	-805.92
PPP1R14A	0.0010256	0.0178895	1.19497	0.253444	FALSE	3.08179e-08	1.19497	0.363942	-174.684
ANG	0.00104	0.0180915	-1.22835	0.140496	FALSE	3.93054e-08	-1.22835	0.374556	-140.094
CXCL3	0.00105655	0.0182803	-0.510388	10.1763	FALSE	1.35375e-07	-0.510388	0.155843	-1119.85
INAFM1	0.00105613	0.0182803	1.66515	0.0853994	FALSE	1.60584e-08	1.66515	0.508421	-91.9239
ERP29	0.00107302	0.018484	-0.411457	1.11846	FALSE	5.03179e-07	-0.411457	0.125803	-486.665
TSC22D1	0.00107408	0.018484	0.613819	0.584022	FALSE	2.60785e-09	0.613819	0.187691	-342.614
CLIC4	0.00111659	0.0191642	-0.768326	0.30854	FALSE	1.36692e-08	-0.768326	0.235728	-238.325
ACOT2	0.00117153	0.0200534	-1.45153	0.0991736	FALSE	6.10972e-05	-1.45153	0.447214	-99.2997
MTPN	0.00118534	0.020211	-0.47757	0.721763	FALSE	5.90726e-07	-0.47757	0.14729	-377.305
OPTN	0.00118703	0.020211	-1.0896	0.168044	FALSE	5.23908e-08	-1.0896	0.336091	-153.334
C3	0.00119315	0.0202615	1.34021	0.140496	FALSE	3.02022e-09	1.34021	0.413581	-129.901
H2AFV	0.00119857	0.0202999	-0.480195	0.831956	FALSE	1.92978e-07	-0.480195	0.148244	-404.068
LAGE3	0.00120733	0.0203943	0.717627	0.292011	FALSE	1.71259e-07	0.717627	0.221685	-241.032
LRRFIP1	0.00121744	0.0205111	-0.309189	2.98623	FALSE	2.11053e-07	-0.309189	0.0955832	-758.477
TRAP1	0.00123549	0.0207608	0.625198	0.0909091	FALSE	0.549558	0.625198	0.193526	-40.9105
HSPE1	0.00125239	0.0209764	0.352347	3.42975	FALSE	6.2062e-08	0.352347	0.109198	-834.989
RRM2B	0.00125813	0.0209764	0.741523	0.0688705	FALSE	0.375959	0.741523	0.229904	-90.6253
ACBD5	0.00125503	0.0209764	-1.61273	0.0909091	FALSE	2.73187e-07	-1.61273	0.499904	-110.628
LBH	0.00127075	0.0211319	1.6253	0.0909091	FALSE	1.75688e-08	1.6253	0.504361	-94.6614
CDC73	0.00127726	0.0211852	-1.15535	0.146006	FALSE	5.78282e-08	-1.15535	0.358687	-154.957
POP5	0.00128055	0.0211852	-0.984389	0.15978	FALSE	0.182562	-0.984389	0.305682	-69.2303
GGH	0.00130403	0.0215181	-1.58472	0.134986	FALSE	2.76876e-09	-1.58472	0.4929	-120.652
FCER1G	0.00131279	0.0215922	-0.216876	12.4711	FALSE	1.2211e-07	-0.216876	0.067496	-1175.02
CD93	0.00131524	0.0215922	0.989519	0.203857	FALSE	9.02079e-08	0.989519	0.308009	-187.978
MS4A7	0.00132228	0.0215972	-0.278123	4.0551	FALSE	4.31476e-08	-0.278123	0.086613	-842.146
MZT1	0.00131894	0.0215972	-0.985209	0.15427	FALSE	0.206485	-0.985209	0.306744	-52.5573
RPS15	0.00134146	0.0218549	0.17366	15.3554	FALSE	1.44722e-07	0.17366	0.054151	-1198.43
IGHG4	0.00135768	0.0220631	-0.798626	0.374656	FALSE	2.28684e-08	-0.798626	0.249298	-285.744
ID3	0.00137521	0.0222225	0.748257	0.443526	FALSE	1.96244e-08	0.748257	0.233845	-286.978
AREG	0.00137157	0.0222225	0.725015	2.64187	FALSE	9.7252e-09	0.725015	0.226527	-641.715
TMEM176B	0.00137787	0.0222225	0.660613	0.589532	FALSE	4.23467e-08	0.660613	0.20649	-369.774
CREG1	0.00139515	0.0224447	-0.430745	0.903581	FALSE	1.46e-06	-0.430745	0.134791	-442.159
GEM	0.00143853	0.0229699	1.22496	0.179063	FALSE	1.35894e-08	1.22496	0.384386	-154.355
DENND4C	0.00143559	0.0229699	-0.973297	0.176309	FALSE	2.6777e-07	-0.973297	0.305358	-170.156
SLC9A3R2	0.00143816	0.0229699	1.17778	0.129477	FALSE	1.95021e-07	1.17778	0.36957	-134.044
ACTA2	0.0014893	0.0237217	0.827606	0.606061	FALSE	1.03896e-08	0.827606	0.260519	-308.711
SPP1	0.00152828	0.0242823	1.04786	5.4573	FALSE	6.19487e-08	1.04786	0.330632	-612.718
DOCK11	0.00153639	0.0243417	-0.918109	0.212121	FALSE	1.11273e-07	-0.918109	0.289833	-193.423
CCL23	0.0015396	0.0243417	-0.721605	0.410468	FALSE	4.50876e-07	-0.721605	0.227843	-296.934
GBP1	0.00155584	0.0245379	-1.0837	0.220386	FALSE	1.00193e-08	-1.0837	0.342504	-178.211
ADAM17	0.00156395	0.0246053	-0.599559	0.512397	FALSE	2.81552e-08	-0.599559	0.189581	-328.053
FNIP2	0.00158787	0.0247761	0.725092	0.341598	FALSE	3.06272e-07	0.725092	0.229596	-271.707
IFITM1	0.0015832	0.0247761	1.42524	0.0826446	FALSE	3.80421e-08	1.42524	0.451169	-98.2188
NSMCE4A	0.00158329	0.0247761	-0.610994	0.101928	FALSE	0.544865	-0.610994	0.193416	-3.45051
RP11-1143G9.4	0.00159024	0.0247761	-0.892379	1.01102	FALSE	1.227e-07	-0.892379	0.282605	-433.602
DUSP4	0.00162914	0.0253207	1.39116	0.121212	FALSE	7.08748e-09	1.39116	0.441548	-108.378
ALAS1	0.00167037	0.0258778	-0.833126	0.316804	FALSE	7.5208e-09	-0.833126	0.265046	-236.926
RPL7A	0.0016759	0.0258778	0.22447	6.38567	FALSE	2.40804e-08	0.22447	0.0714335	-962.553
GAS6	0.00167708	0.0258778	1.11975	0.137741	FALSE	5.06551e-08	1.11975	0.356365	-134.225
ZFP36L2	0.00168756	0.0258949	0.45032	0.980716	FALSE	1.03696e-08	0.45032	0.143399	-470.801
TFPI	0.00168607	0.0258949	0.982585	0.22314	FALSE	1.40543e-08	0.982585	0.312866	-171.209
GGA2	0.00169029	0.0258949	-0.867887	0.203857	FALSE	6.07458e-08	-0.867887	0.276409	-186.675
CITED4	0.00170846	0.0261109	1.67876	0.0661157	FALSE	2.27454e-07	1.67876	0.535194	-88.2521
HOTAIRM1	0.00173107	0.0263936	1.0094	0.137741	FALSE	6.21396e-07	1.0094	0.322198	-150.958
HSPG2	0.00175169	0.0266448	1.29656	0.0798898	FALSE	0.236098	1.29656	0.414317	0
DYX1C1	0.00176671	0.0268097	-1.80121	0.0881543	FALSE	1.31741e-09	-1.80121	0.576041	-94.5303
DUT	0.00181389	0.0274607	-0.582577	0.559229	FALSE	1.2991e-07	-0.582577	0.186776	-310.759
MRPL1	0.00185666	0.0280421	-0.810771	0.253444	FALSE	3.37253e-07	-0.810771	0.26051	-214.378
BMS1	0.00188343	0.0283399	-0.606684	0.112948	FALSE	0.489276	-0.606684	0.195199	-102.904
RPL6	0.00188521	0.0283399	0.210704	6.17906	FALSE	7.35579e-07	0.210704	0.0677996	-928.483
SDCBP	0.00189045	0.0283523	-0.268686	3.89532	FALSE	3.13404e-08	-0.268686	0.0864796	-822.592
ECH1	0.00189975	0.0284253	-0.404611	0.986226	FALSE	4.4813e-07	-0.404611	0.13029	-443.869
GNB2L1	0.00191617	0.0286045	0.220406	6.62259	FALSE	6.4832e-07	0.220406	0.0710316	-968.562
EMP2	0.00192806	0.0287152	1.17128	0.173554	FALSE	5.11259e-08	1.17128	0.377699	-138.403
SNAPIN	0.00198666	0.0295194	-0.685572	0.311295	FALSE	6.59327e-08	-0.685572	0.221709	-232.2
ABHD14A	0.00199905	0.0295476	0.624692	0.077135	FALSE	0.58708	0.624692	0.202141	-50.6834
MYLK	0.00200237	0.0295476	1.54647	0.0964187	FALSE	1.39345e-08	1.54647	0.500494	-99.6721
ACADS	0.00199592	0.0295476	-1.29738	0.101928	FALSE	0.0177314	-1.29738	0.41975	-27.557
RUNX1	0.00201224	0.0296252	-0.554326	0.460055	FALSE	1.00506e-06	-0.554326	0.179485	-313.514
SEC14L1	0.00206197	0.0302878	0.853554	0.187328	FALSE	4.62708e-07	0.853554	0.277024	-185.32
RHBDD2	0.00208822	0.0306034	-0.469515	0.823691	FALSE	5.80006e-08	-0.469515	0.152569	-422.877
SFT2D1	0.00211635	0.0308006	-0.418601	0.876033	FALSE	7.46153e-07	-0.418601	0.136201	-428.078
FOLR3	0.00211652	0.0308006	-0.873851	0.900826	FALSE	1.04769e-07	-0.873851	0.284329	-408.254
GSTO1	0.00212087	0.0308006	-0.253819	4.77686	FALSE	7.70689e-07	-0.253819	0.082603	-878.977
ST13	0.00211929	0.0308006	-0.355158	1.40771	FALSE	4.71324e-08	-0.355158	0.115574	-546.047
FFAR4	0.00212723	0.0308232	-1.76352	0.0826446	FALSE	1.00793e-08	-1.76352	0.574086	-91.97
ANKRD37	0.00213499	0.030866	1.1666	0.112948	FALSE	3.42465e-07	1.1666	0.379902	-126.586
MT2A	0.0021585	0.0311358	-0.368314	17.6143	FALSE	8.15942e-09	-0.368314	0.120069	-1364.57
CCND2	0.00220185	0.0316898	1.43524	0.0743802	FALSE	2.63338e-07	1.43524	0.468793	-91.9001
GBP2	0.00222463	0.0317332	-0.786556	0.206612	FALSE	0.096312	-0.786556	0.257172	-71.0843
BASP1	0.00221634	0.0317332	0.629836	0.619835	FALSE	1.23921e-08	0.629836	0.205856	-377.978
HLA-DQB1	0.00222257	0.0317332	-0.273855	6.21488	FALSE	2.25229e-09	-0.273855	0.0895316	-971.354
NXT1	0.00222397	0.0317332	0.738483	0.239669	FALSE	2.0037e-07	0.738483	0.241447	-213.286
OSTF1	0.00225573	0.0321054	-0.493004	0.674931	FALSE	4.83216e-08	-0.493004	0.161412	-394.477
MRPS18C	0.00227261	0.032274	-0.605924	0.344353	FALSE	8.87391e-07	-0.605924	0.198528	-255.684
SNTB1	0.0022913	0.0323962	-1.14572	0.115702	FALSE	0.00154752	-1.14572	0.375693	-18.9366
TNNI2	0.00229019	0.0323962	-0.781508	0.267218	FALSE	8.01125e-09	-0.781508	0.256252	-209.361
ASAH1	0.00232362	0.0327809	-0.309153	2.47107	FALSE	3.94187e-07	-0.309153	0.101514	-702.572
PTPRA	0.00234777	0.033049	-0.880696	0.206612	FALSE	2.09246e-08	-0.880696	0.289483	-191.977
POLD3	0.00237081	0.0333003	-1.639	0.077135	FALSE	0.145163	-1.639	0.539258	-20.1877
STAU1	0.00239245	0.0335309	-0.623139	0.380165	FALSE	6.42206e-07	-0.623139	0.205208	-278.548
COMT	0.00242409	0.0339003	-0.378703	1.12121	FALSE	6.28244e-07	-0.378703	0.124875	-478.317
TAGLN	0.00245851	0.0343069	0.74145	0.853994	FALSE	7.01824e-08	0.74145	0.244832	-367.034
CETN2	0.00251853	0.0350683	-0.529438	0.396694	FALSE	0.57513	-0.529438	0.175246	-76.7539
SLAIN2	0.00254641	0.0352426	-0.915592	0.168044	FALSE	8.21317e-08	-0.915592	0.3034	-165.052
ALKBH7	0.00254641	0.0352426	0.579177	0.454545	FALSE	1.16747e-07	0.579177	0.191922	-322.028
RPL18	0.00254752	0.0352426	0.210293	6.94766	FALSE	1.33736e-08	0.210293	0.069688	-988.375
B3GNT7	0.00255695	0.0352968	-2.07446	0.077135	FALSE	3.07354e-09	-2.07446	0.6877	-90.7385
PPCDC	0.00258337	0.0355851	-0.788982	0.0578512	FALSE	0.37396	-0.788982	0.261824	-39.4118
INF2	0.00260102	0.0357515	-1.26214	0.0991736	FALSE	0.00780727	-1.26214	0.419129	-18.72
VAMP8	0.00261994	0.0359345	-0.240838	3.92011	FALSE	1.30249e-06	-0.240838	0.0800356	-816.697
CD163	0.0026423	0.0361242	-0.474607	0.898072	FALSE	4.15142e-08	-0.474607	0.157858	-441.221
C17orf89	0.00264502	0.0361242	0.623418	0.347107	FALSE	1.31359e-07	0.623418	0.207375	-270.128
TMEM63A	0.00265953	0.0362453	-1.23407	0.0633609	FALSE	0.110307	-1.23407	0.410729	0
SLC44A1	0.00266878	0.0362943	0.731284	0.267218	FALSE	3.42201e-07	0.731284	0.243476	-226.161
RPL36	0.00270058	0.036649	0.178697	10.7135	FALSE	1.4394e-08	0.178697	0.0595673	-1097.11
HEATR5B	0.00273822	0.0370815	-1.1264	0.112948	FALSE	0.0812645	-1.1264	0.376008	-83.6358
GPI	0.00275088	0.0371715	-0.660634	0.300275	FALSE	3.47823e-07	-0.660634	0.220632	-235.604
SNU13	0.00275645	0.0371715	0.360999	1.14601	FALSE	1.65887e-07	0.360999	0.120587	-507.188
NDUFA4L2	0.00276787	0.0372473	1.52946	0.121212	FALSE	1.82472e-08	1.52946	0.511115	-110.156
LRPAP1	0.0028272	0.0379661	-0.31565	1.87603	FALSE	9.63623e-08	-0.31565	0.105713	-610.961
TMED5	0.00284536	0.0380233	-0.534851	0.501377	FALSE	9.0425e-07	-0.534851	0.179241	-325.426
SCPEP1	0.00283802	0.0380233	-0.519497	0.592287	FALSE	2.10808e-07	-0.519497	0.17405	-351.077
HCST	0.00284923	0.0380233	0.364169	2.60882	FALSE	4.61865e-07	0.364169	0.122059	-772.537
EIF4A3	0.00287875	0.0383376	0.46872	0.787879	FALSE	1.09456e-07	0.46872	0.157268	-429.432
BCL2A1	0.00289692	0.0384997	0.365552	2.07713	FALSE	8.16685e-07	0.365552	0.122732	-700.233
NPDC1	0.00296129	0.0391928	1.29625	0.118457	FALSE	3.49651e-09	1.29625	0.436195	-107.907
RPL21	0.00295669	0.0391928	0.176662	18.3113	FALSE	1.70052e-07	0.176662	0.0594382	-1296.53
OSBPL11	0.00297697	0.0393193	-0.771214	0.231405	FALSE	3.16341e-07	-0.771214	0.259659	-216.925
PLEKHO1	0.00298527	0.0393479	0.734714	0.22865	FALSE	1.26725e-07	0.734714	0.247441	-210.676
CD300A	0.0030393	0.039978	1.09545	0.118457	FALSE	2.48003e-08	1.09545	0.369617	-128.16
NRBF2	0.00311731	0.0409203	-0.727452	0.316804	FALSE	2.27841e-08	-0.727452	0.2461	-249.066
GPNMB	0.0031437	0.0411824	0.363855	2.67769	FALSE	4.38158e-07	0.363855	0.123202	-756.739
TBXAS1	0.00315826	0.0412531	-0.420548	0.330579	FALSE	0.772001	-0.420548	0.142467	-128.36
GDF15	0.00316194	0.0412531	1.4671	0.0936639	FALSE	2.37542e-08	1.4671	0.497061	-101.726
NCEH1	0.00319336	0.0414943	-0.550562	0.451791	FALSE	4.03767e-07	-0.550562	0.186727	-315.191
HN1	0.0031895	0.0414943	-0.382086	1.20386	FALSE	3.91956e-07	-0.382086	0.129571	-507.978
PDLIM4	0.00322852	0.041782	1.51972	0.0661157	FALSE	1.04423e-08	1.51972	0.516016	-75.5205
GNG11	0.00322659	0.041782	0.860369	0.336088	FALSE	1.0029e-08	0.860369	0.292117	-235.067
NDRG2	0.00324739	0.0418674	1.15085	0.123967	FALSE	6.00577e-09	1.15085	0.391007	-125.276
MTHFD1	0.00324816	0.0418674	-1.9127	0.0633609	FALSE	0.0955766	-1.9127	0.649866	-25.691
TMEM261	0.00329719	0.0423352	-0.528198	0.501377	FALSE	1.12027e-07	-0.528198	0.179746	-324.398
EMILIN2	0.00329765	0.0423352	-0.645774	0.418733	FALSE	1.73291e-08	-0.645774	0.21976	-302.482
RASGEF1B	0.00335038	0.0428939	-0.596663	0.564738	FALSE	3.63571e-08	-0.596663	0.203388	-368.193
STK38L	0.00335453	0.0428939	1.02814	0.137741	FALSE	3.92045e-08	1.02814	0.350513	-148.03
STX12	0.00340983	0.0435144	-0.591355	0.374656	FALSE	1.93751e-07	-0.591355	0.201955	-272.481
ABR	0.00343902	0.0437997	-0.989757	0.0798898	FALSE	0.157052	-0.989757	0.33832	-76.8195
ARPC5	0.00344643	0.0438072	-0.254231	2.92837	FALSE	4.95858e-07	-0.254231	0.0869216	-723.507
AGO2	0.00350888	0.0445128	1.00796	0.134986	FALSE	4.70348e-08	1.00796	0.345283	-136.637
RRP1B	0.00354276	0.044854	0.62341	0.077135	FALSE	0.426539	0.62341	0.213772	-1.73625
APEH	0.00356629	0.045063	-0.968105	0.134986	FALSE	5.53248e-06	-0.968105	0.332205	-146.453
TCTN3	0.00362384	0.0457002	0.999308	0.0688705	FALSE	0.12874	0.999308	0.343502	0
CYSLTR1	0.00372281	0.046817	-1.08318	0.123967	FALSE	3.16959e-07	-1.08318	0.373415	-139.846
CYB5R3	0.00372698	0.046817	-0.419402	0.77135	FALSE	8.01123e-08	-0.419402	0.144602	-401.051
BGN	0.00374316	0.0469284	1.03122	0.214876	FALSE	2.66386e-08	1.03122	0.355711	-159.79
RPLP0	0.00376769	0.0470521	0.229484	5.02204	FALSE	1.08155e-07	0.229484	0.0792148	-895.784
COX7A1	0.00376626	0.0470521	1.1869	0.107438	FALSE	8.78303e-09	1.1869	0.409685	-118.719
FAU	0.00385384	0.0480346	0.171299	10.4435	FALSE	5.84388e-08	0.171299	0.0592754	-1088.54
SPATS2L	0.00387744	0.0482351	-0.495417	0.520661	FALSE	6.50025e-07	-0.495417	0.171545	-320.586
PID1	0.00390591	0.0484953	1.44132	0.0881543	FALSE	6.57942e-08	1.44132	0.499475	-104.332
RPL31	0.00395192	0.0489717	0.205456	7.86777	FALSE	4.53196e-07	0.205456	0.0712901	-1043.64
TBPL1	0.00397403	0.0491506	0.97352	0.126722	FALSE	5.60804e-08	0.97352	0.338002	-139.24
COL1A2	0.00398166	0.0491506	1.07653	0.322314	FALSE	1.64987e-09	1.07653	0.373844	-195.636
JARID2	0.00404726	0.0498321	1.00602	0.126722	FALSE	2.40212e-07	1.00602	0.349986	-143.927
RPLP1	0.0040524	0.0498321	0.150524	26.8788	FALSE	5.94919e-08	0.150524	0.0523734	-1395.88
LY96	0.00408143	0.0500932	-0.381768	1.09917	FALSE	4.1728e-07	-0.381768	0.132937	-501.463
U2SURP	0.00413527	0.050657	-0.638325	0.283747	FALSE	5.11899e-07	-0.638325	0.222595	-222.795
CYB5A	0.00416482	0.0509219	-0.535322	0.600551	FALSE	3.81708e-08	-0.535322	0.186823	-348.897
C11orf58	0.00418195	0.0510341	-0.35687	1.16804	FALSE	7.99626e-07	-0.35687	0.124601	-506.68
FERMT3	0.00420368	0.0512019	-0.590688	0.413223	FALSE	6.85467e-08	-0.590688	0.206357	-288.604
JAML	0.00424219	0.0515732	-0.502007	0.754821	FALSE	3.43059e-08	-0.502007	0.175554	-409.34
SNHG25	0.00431509	0.0523602	0.458179	0.730028	FALSE	4.67151e-08	0.458179	0.16053	-426.879
IGKC	0.00436731	0.0527867	0.258434	5.19008	FALSE	6.22383e-09	0.258434	0.0906678	-966.538
PTDSS1	0.00436582	0.0527867	0.948624	0.126722	FALSE	1.34228e-07	0.948624	0.332798	-142.32
SLC43A2	0.00437491	0.0527867	-0.63157	0.352617	FALSE	8.53235e-08	-0.63157	0.22162	-280.423
MFSD7	0.00439216	0.0528665	-0.83441	0.206612	FALSE	8.35059e-08	-0.83441	0.292926	-188.532
ENPP4	0.00439799	0.0528665	-0.807382	0.190083	FALSE	1.31641e-07	-0.807382	0.28348	-182.223
SGPP1	0.00441596	0.0529833	-1.76144	0.0633609	FALSE	0.0366808	-1.76144	0.618742	-62.0232
GAPDH	0.00444199	0.0530093	0.18216	9.20386	FALSE	4.85968e-09	0.18216	0.0640296	-1043.21
NFKBIA	0.0044429	0.0530093	0.29618	6.73829	FALSE	4.0034e-09	0.29618	0.10411	-1038.36
RPL23	0.00442686	0.0530093	0.209064	5.38017	FALSE	7.68319e-08	0.209064	0.0734582	-915.516
CCNK	0.00445815	0.0530925	-0.832073	0.162534	FALSE	0.00191208	-0.832073	0.292594	-154.904
DERL2	0.004468	0.0531113	-0.639072	0.30854	FALSE	3.22589e-08	-0.639072	0.224781	-242.851
RPL27A	0.0045065	0.0534699	0.173608	14.5179	FALSE	1.01004e-07	0.173608	0.061122	-1215.89
TAF12	0.00453461	0.0537041	-0.72696	0.261708	FALSE	3.33924e-07	-0.72696	0.25612	-235.034
CD84	0.00461582	0.0545174	0.743307	0.247934	FALSE	2.27307e-07	0.743307	0.262403	-218.961
RRBP1	0.00462026	0.0545174	-0.520842	0.46832	FALSE	1.70962e-07	-0.520842	0.183888	-311.202
SMAD4	0.00465044	0.0547728	1.11824	0.0936639	FALSE	2.0329e-07	1.11824	0.395095	-115.224
PDIA4	0.00467512	0.0548622	-0.539957	0.484848	FALSE	5.08442e-08	-0.539957	0.190892	-317.279
DDA1	0.00466766	0.0548622	-0.702467	0.239669	FALSE	1.09764e-06	-0.702467	0.248299	-210.467
SEMA4A	0.0047057	0.0549198	1.18618	0.101928	FALSE	1.71981e-08	1.18618	0.41966	-111.6
LHFPL2	0.00470132	0.0549198	0.755284	0.236915	FALSE	4.7742e-07	0.755284	0.267185	-216.134
IGHA1	0.00469448	0.0549198	0.350841	4.49862	FALSE	8.91821e-08	0.350841	0.124091	-935.84
NAPG	0.0047216	0.0550054	-1.16708	0.101928	FALSE	4.99597e-08	-1.16708	0.41306	-117.306
ARRDC4	0.00473947	0.0551136	-0.777631	0.23416	FALSE	1.48632e-07	-0.777631	0.275343	-203.551
CMPK1	0.00475165	0.0551552	-0.588425	0.385675	FALSE	2.10931e-07	-0.588425	0.20841	-289.239
CD52	0.00479058	0.0553071	-0.278651	10.5647	FALSE	3.67542e-08	-0.278651	0.0987847	-1199.34
CTNNAL1	0.00478696	0.0553071	1.38695	0.0716253	FALSE	2.36059e-08	1.38695	0.491647	-85.8144
GLTSCR2	0.00478641	0.0553071	0.39097	0.909091	FALSE	9.57302e-07	0.39097	0.138589	-454.578
COL4A1	0.00481855	0.0555301	1.15122	0.112948	FALSE	3.1216e-08	1.15122	0.408392	-115.906
VASP	0.00483091	0.0555728	-0.368411	0.911846	FALSE	8.84092e-07	-0.368411	0.13073	-444.939
OAZ2	0.00486178	0.0558279	0.604903	0.300275	FALSE	3.16772e-08	0.604903	0.214805	-234.088
LEPROTL1	0.00488578	0.0559034	-0.428569	0.666667	FALSE	1.45303e-06	-0.428569	0.152273	-380.33
BTG1	0.00488064	0.0559034	0.292096	4.39394	FALSE	6.71105e-08	0.292096	0.103771	-907.757
P4HB	0.0050298	0.0574489	-0.379124	0.969697	FALSE	5.78079e-07	-0.379124	0.135154	-463.578
CAPZA2	0.00504885	0.0575641	-0.303228	1.47383	FALSE	9.43867e-07	-0.303228	0.108145	-548.602
FCGR1B	0.00511104	0.0580669	-0.822096	0.22314	FALSE	1.46712e-07	-0.822096	0.293611	-202.065
HSPBP1	0.00510684	0.0580669	0.797739	0.179063	FALSE	6.83937e-08	0.797739	0.284885	-169.456
TCEAL8	0.00512556	0.058129	-0.456024	0.559229	FALSE	3.28631e-07	-0.456024	0.162922	-337.87
PPIC	0.00513614	0.0581462	-0.86729	0.22865	FALSE	5.7702e-09	-0.86729	0.309927	-175.967
EIF3H	0.00516355	0.058251	-0.350945	1.22314	FALSE	2.49243e-07	-0.350945	0.125488	-517.925
EIF5A	0.00515893	0.058251	0.358914	1.43802	FALSE	5.07055e-07	0.358914	0.128324	-569.22
APOE	0.00517921	0.0583252	-0.382444	18.3444	FALSE	9.64116e-10	-0.382444	0.136799	-1355.99
FUS	0.00522766	0.0587676	0.366366	0.873278	FALSE	1.06671e-06	0.366366	0.131189	-431.938
METTL21A	0.00525513	0.0589732	0.931389	0.118457	FALSE	5.02141e-07	0.931389	0.333716	-126.187
TPSB2	0.00527009	0.0590378	1.30786	0.173554	FALSE	1.49045e-09	1.30786	0.468759	-121.82
IL7R	0.00530097	0.0591773	-0.471129	1.16529	FALSE	1.11533e-08	-0.471129	0.168975	-525.069
CD68	0.0052978	0.0591773	-0.226381	6.85124	FALSE	2.56205e-08	-0.226381	0.0811882	-986.253
SLC15A3	0.00534253	0.0595376	-0.726777	0.253444	FALSE	5.35678e-08	-0.726777	0.260903	-220.883
PSMA7	0.00538973	0.0599596	-0.210569	4.62259	FALSE	2.97001e-07	-0.210569	0.075669	-853.045
RPL22	0.00549997	0.0610801	0.194217	5.27824	FALSE	3.553e-07	0.194217	0.0699582	-890.462
CHST12	0.00555971	0.0615823	-1.36812	0.077135	FALSE	3.57029e-05	-1.36812	0.493428	-88.1374
COX6C	0.00556438	0.0615823	-0.250643	2.82645	FALSE	2.71831e-07	-0.250643	0.0904062	-727.634
IL1R1	0.00562811	0.0620736	1.41597	0.077135	FALSE	7.16336e-08	1.41597	0.511421	-79.2143
CEP57	0.00562188	0.0620736	-1.54837	0.0688705	FALSE	2.2558e-08	-1.54837	0.559167	-87.2225
CYHR1	0.00568768	0.0625312	0.84876	0.0716253	FALSE	0.160951	0.84876	0.306936	0
SUMO2	0.00568908	0.0625312	-0.25538	2.20386	FALSE	1.49835e-06	-0.25538	0.0923554	-643.935
IRF2BP2	0.00570436	0.0625919	0.592515	0.30303	FALSE	1.03876e-06	0.592515	0.214345	-253.53
CHML	0.00577035	0.063208	-0.988737	0.137741	FALSE	1.31016e-07	-0.988737	0.358166	-151.02
IGLC3	0.00587904	0.0642889	0.468458	0.636364	FALSE	1.83339e-07	0.468458	0.170073	-388.529
IFIH1	0.00591327	0.0645532	-0.601283	0.077135	FALSE	0.518697	-0.601283	0.218446	-30.8725
THEMIS2	0.00593447	0.0646746	-0.535848	0.429752	FALSE	1.1707e-06	-0.535848	0.194756	-311.171
CLIP4	0.00606889	0.0658233	-0.960463	0.143251	FALSE	4.71637e-07	-0.960463	0.350018	-152.678
SLC31A1	0.00605228	0.0658233	-0.620153	0.385675	FALSE	4.34336e-08	-0.620153	0.225926	-283.004
LINC01503	0.00607063	0.0658233	1.22532	0.107438	FALSE	2.11159e-07	1.22532	0.446556	-126.031
MEF2C	0.00612032	0.0661386	0.655349	0.316804	FALSE	8.52896e-08	0.655349	0.239068	-252.399
UBE2D2	0.00611118	0.0661386	0.465454	0.592287	FALSE	1.87461e-07	0.465454	0.169765	-366.604
HES4	0.0061678	0.066428	0.930379	0.129477	FALSE	2.22985e-07	0.930379	0.339713	-135.62
LDB2	0.00616769	0.066428	1.31498	0.0716253	FALSE	6.69619e-09	1.31498	0.480141	-79.1378
DNAJA1	0.00624306	0.067126	-0.257352	3.6832	FALSE	3.26052e-08	-0.257352	0.0941049	-813.004
HIST1H4C	0.00632373	0.0678796	-0.729696	1.2562	FALSE	6.90299e-08	-0.729696	0.267239	-343.949
NGDN	0.0064172	0.068768	0.734994	0.181818	FALSE	3.71882e-07	0.734994	0.269657	-176.334
ANXA6	0.00645578	0.069066	0.697607	0.212121	FALSE	6.03303e-08	0.697607	0.256126	-187.82
FCGR1A	0.00649035	0.0693204	-0.436948	0.713499	FALSE	7.4286e-08	-0.436948	0.160529	-385.406
CCL21	0.00652393	0.069448	1.38177	0.245179	FALSE	5.55889e-08	1.38177	0.507965	-139.372
ETHE1	0.00651466	0.069448	-0.525246	0.424242	FALSE	6.49267e-07	-0.525246	0.193057	-291.253
ANXA5	0.0065387	0.0694899	-0.215418	4.52617	FALSE	1.60907e-07	-0.215418	0.0792133	-858.21
CHMP5	0.00656725	0.069678	-0.391762	0.790634	FALSE	2.31681e-07	-0.391762	0.144135	-413.862
GBA	0.0066684	0.0703625	-0.672816	0.245179	FALSE	6.50992e-08	-0.672816	0.248	-208.618
ESD	0.00667562	0.0703625	-0.362215	0.936639	FALSE	1.06612e-07	-0.362215	0.13353	-456.836
BCL2	0.00665533	0.0703625	1.47359	0.0550964	FALSE	3.48876e-07	1.47359	0.543035	-79.2362
YIPF2	0.00664484	0.0703625	0.866995	0.134986	FALSE	1.40255e-07	0.866995	0.319437	-142.995
ATP1B3	0.006687	0.0703669	0.268712	2.09091	FALSE	1.58799e-06	0.268712	0.099081	-654.035
PSMB8	0.00679045	0.0713386	-0.377286	0.881543	FALSE	5.71005e-07	-0.377286	0.139377	-435.372
CALCRL	0.00685369	0.0718754	1.45616	0.0991736	FALSE	5.68877e-09	1.45616	0.538547	-92.2571
CAPRIN1	0.00686394	0.0718754	-0.752222	0.190083	FALSE	2.40655e-08	-0.752222	0.278253	-169.868
ATP2C1	0.00692419	0.0721746	-0.75193	0.203857	FALSE	6.57343e-08	-0.75193	0.278444	-192.956
KCTD5	0.00690766	0.0721746	-0.986038	0.134986	FALSE	1.4118e-07	-0.986038	0.365028	-141.642
GPCPD1	0.00692624	0.0721746	-0.396087	0.953168	FALSE	1.2518e-06	-0.396087	0.146679	-482.081
FCN3	0.00699073	0.0726108	1.04623	0.385675	FALSE	6.81314e-08	1.04623	0.387882	-210.505
SAMD9L	0.00698809	0.0726108	-0.806605	0.203857	FALSE	3.71887e-09	-0.806605	0.299029	-182.309
ABHD5	0.00701304	0.0727249	-0.534361	0.515152	FALSE	4.80329e-07	-0.534361	0.198188	-340.69
MDM2	0.00702873	0.07277	-1.01371	0.118457	FALSE	5.5767e-08	-1.01371	0.376078	-132.852
CLEC4E	0.00707261	0.0730931	0.845716	0.187328	FALSE	3.42642e-08	0.845716	0.313995	-185.39
RPS2	0.00708271	0.0730931	0.164919	18.157	FALSE	2.00162e-09	0.164919	0.0612413	-1285.99
NOP2	0.00711591	0.0733179	1.24705	0.0688705	FALSE	4.98675e-07	1.24705	0.463352	-92.3692
RALBP1	0.00714409	0.0733727	-0.518597	0.358127	FALSE	1.81127e-07	-0.518597	0.192783	-256.908
SNRPB	0.0071345	0.0733727	0.319374	1.11295	FALSE	1.13112e-07	0.319374	0.118704	-477.472
UBC	0.00716057	0.0734245	0.224581	9.70248	FALSE	3.03312e-08	0.224581	0.0835097	-1125.13
C2	0.0071883	0.0735106	-0.887245	0.198347	FALSE	3.44282e-09	-0.887245	0.330077	-169.817
PRKDC	0.00719188	0.0735106	-0.518926	0.192837	FALSE	0.309898	-0.518926	0.193065	-171.981
STXBP2	0.00721861	0.0736665	-0.351624	1.47934	FALSE	1.47899e-07	-0.351624	0.130881	-591.605
EIF3I	0.00724234	0.0737914	0.384818	0.738292	FALSE	9.6229e-08	0.384818	0.143295	-400.402
ACTR3	0.00734969	0.0747554	-0.333146	1.14876	FALSE	2.88971e-07	-0.333146	0.124282	-497.659
S1PR4	0.00736024	0.0747554	-0.722491	0.283747	FALSE	7.58616e-08	-0.722491	0.269577	-236.408
COA6	0.0074249	0.0751742	-0.682869	0.201102	FALSE	0.0392764	-0.682869	0.255072	-8.62687
ANAPC15	0.00742419	0.0751742	-0.571447	0.338843	FALSE	1.77383e-07	-0.571447	0.21345	-266.008
NDUFA4	0.00755769	0.0759199	-0.218176	3.78512	FALSE	2.56624e-07	-0.218176	0.0816768	-784.1
FHOD1	0.00753363	0.0759199	0.548695	0.077135	FALSE	0.59786	0.548695	0.205328	-29.7442
NAGLU	0.00755426	0.0759199	-1.26943	0.0853994	FALSE	9.59127e-08	-1.26943	0.475198	-103.054
SIRPB1	0.00753687	0.0759199	-1.32384	0.0743802	FALSE	0.189005	-1.32384	0.495422	0
PCNA	0.00751802	0.0759199	-0.774343	0.322314	FALSE	4.43852e-08	-0.774343	0.289693	-215.528
MRPS33	0.00760344	0.0761412	-0.690767	0.236915	FALSE	3.12346e-08	-0.690767	0.258793	-204.165
NFIL3	0.00759322	0.0761412	0.79989	0.165289	FALSE	2.34637e-07	0.79989	0.299624	-171.086
BCAM	0.00764888	0.0764768	1.34184	0.0661157	FALSE	8.30163e-08	1.34184	0.503092	-75.2679
CST6	0.00774123	0.0772799	1.03851	0.137741	FALSE	1.95582e-08	1.03851	0.389957	-155.918
UQCRH	0.00780489	0.0775535	-0.240551	2.56198	FALSE	8.08995e-08	-0.240551	0.0904194	-686.001
TRIM14	0.0078008	0.0775535	-1.32232	0.0853994	FALSE	1.06179e-08	-1.32232	0.497006	-104.33
RTN1	0.00778437	0.0775535	-1.69289	0.0606061	FALSE	4.80497e-08	-1.69289	0.636119	-80.0415
C1S	0.00783695	0.0776318	0.912188	0.245179	FALSE	2.17866e-08	0.912188	0.343055	-172.667
RPS16	0.00783236	0.0776318	0.164967	10.5014	FALSE	7.22268e-07	0.164967	0.0620361	-1101.51
TRAM1	0.00786953	0.0778344	-0.40901	0.672176	FALSE	7.63626e-08	-0.40901	0.153901	-382.622
RSRP1	0.00796501	0.0784162	0.47072	0.46832	FALSE	5.47924e-07	0.47072	0.177393	-335.387
CST7	0.00795274	0.0784162	1.11559	0.115702	FALSE	6.03207e-09	1.11559	0.420333	-113.111
NCF4	0.0079558	0.0784162	-0.598431	0.31405	FALSE	1.69005e-07	-0.598431	0.225488	-240.17
NFKBID	0.00800283	0.0786679	0.799663	0.184573	FALSE	2.85204e-07	0.799663	0.301538	-178.659
HAUS2	0.00802156	0.0787315	-0.802345	0.168044	FALSE	3.64302e-07	-0.802345	0.302639	-166.964
PAIP2	0.00806097	0.0789975	-0.410694	0.716253	FALSE	5.68521e-07	-0.410694	0.155008	-396.642
C7	0.0081175	0.0794302	1.30368	0.184573	FALSE	4.04934e-08	1.30368	0.492486	-121.673
BLMH	0.00813295	0.0794603	-1.33394	0.0743802	FALSE	8.22356e-08	-1.33394	0.504039	-89.4603
SPARC	0.00817368	0.0797369	0.549308	0.578512	FALSE	1.40785e-08	0.549308	0.207693	-351.774
TYMP	0.00822831	0.0801479	0.230017	3.95868	FALSE	9.01085e-08	0.230017	0.0870434	-853.56
RPL38	0.00825208	0.0802577	0.164567	8.24793	FALSE	1.07651e-07	0.164567	0.0622989	-1020.34
PYCARD	0.00831544	0.0807516	-0.294285	1.84848	FALSE	3.13515e-07	-0.294285	0.111514	-622.705
MKNK1	0.00842605	0.0817021	-0.640212	0.275482	FALSE	1.05156e-07	-0.640212	0.243011	-237.856
CCDC115	0.00849214	0.082095	-0.553711	0.316804	FALSE	7.85137e-08	-0.553711	0.210388	-239.859
AC013461.1	0.0084864	0.082095	0.924944	0.157025	FALSE	7.91889e-08	0.924944	0.351412	-157.372
S100A6	0.0085242	0.082281	-0.158932	38.1405	FALSE	7.09958e-08	-0.158932	0.0604172	-1564.37
TUBG1	0.00855015	0.0824075	-1.05849	0.0964187	FALSE	0.0895894	-1.05849	0.402538	0
S100P	0.00865166	0.0832609	-1.12233	0.220386	FALSE	6.07783e-09	-1.12233	0.42747	-168.332
DOK3	0.00872371	0.0838286	-0.765745	0.173554	FALSE	2.20693e-07	-0.765745	0.291969	-171.217
SMCO4	0.00875136	0.0839686	-0.411036	0.705234	FALSE	6.20744e-07	-0.411036	0.156787	-391.847
ZNF281	0.00882199	0.08452	0.872348	0.132231	FALSE	2.39632e-07	0.872348	0.3331	-146.215
COL3A1	0.00883746	0.084542	0.882936	0.231405	FALSE	5.42977e-08	0.882936	0.33722	-188.214
MZT2B	0.00885712	0.084604	-0.362264	0.958678	FALSE	5.12274e-07	-0.362264	0.1384	-468.755
AGTRAP	0.00893202	0.0851926	-0.476581	0.46281	FALSE	7.23516e-07	-0.476581	0.182274	-313.988
RPS14	0.00895571	0.0852885	0.145143	16.9532	FALSE	2.23082e-07	0.145143	0.0555307	-1240.16
BAD	0.00896865	0.0852885	0.718904	0.176309	FALSE	1.0628e-07	0.718904	0.2751	-167.673
FEZ2	0.00898356	0.085304	-0.520113	0.341598	FALSE	4.6902e-07	-0.520113	0.199073	-248.503
THBD	0.00903351	0.0856515	-0.388408	1.17631	FALSE	1.41586e-08	-0.388408	0.148771	-524.004
GMPR	0.00904896	0.0856715	-1.19133	0.0798898	FALSE	0.136428	-1.19133	0.456412	-40.06
CD47	0.00915937	0.0865891	-0.322574	1.26446	FALSE	3.04582e-07	-0.322574	0.123779	-519.386
NBL1	0.00921201	0.0869446	0.917899	0.225895	FALSE	3.27201e-08	0.917899	0.352484	-162.73
BRCC3	0.00923162	0.0869446	-1.51691	0.0633609	FALSE	2.4226e-08	-1.51691	0.582677	-85.7506
COL6A1	0.00923761	0.0869446	0.982713	0.165289	FALSE	1.57576e-08	0.982713	0.377512	-146.731
MPHOSPH6	0.00926698	0.0870933	-0.38667	0.892562	FALSE	9.02587e-08	-0.38667	0.148602	-463.722
XRCC5	0.00939124	0.0880829	-0.397468	0.69146	FALSE	1.33989e-07	-0.397468	0.153021	-388.543
C19orf60	0.00939972	0.0880829	-0.351727	0.911846	FALSE	8.43008e-08	-0.351727	0.135427	-451.631
FKBP1A	0.00943331	0.0882688	-0.225592	3.03581	FALSE	4.16059e-08	-0.225592	0.0869018	-734.716
RAB14	0.00948868	0.0886577	-0.54217	0.347107	FALSE	1.20945e-07	-0.54217	0.209015	-266.511
PPA1	0.0095733	0.0893	0.418754	0.564738	FALSE	5.72436e-07	0.418754	0.161627	-339.513
CLN5	0.00959916	0.0893	-0.674158	0.190083	FALSE	0.29418	-0.674158	0.260298	-67.4586
MT-ND4L	0.00958678	0.0893	-0.302493	1.83196	FALSE	2.73742e-07	-0.302493	0.116775	-660.674
CENPH	0.0096425	0.0895734	-1.49363	0.0661157	FALSE	1.51982e-09	-1.49363	0.577048	-79.9466
FRMD4A	0.00970203	0.0899413	-0.84805	0.168044	FALSE	8.95164e-08	-0.84805	0.327904	-163.95
2004-09-01	0.00971013	0.0899413	0.540464	0.0716253	FALSE	0.538365	0.540464	0.208997	-31.1692
ARPC3	0.00973718	0.0900619	-0.183944	5.17906	FALSE	9.94549e-08	-0.183944	0.0711574	-870.952
TAF15	0.00982427	0.0907367	-0.689911	0.203857	FALSE	7.6524e-07	-0.689911	0.267205	-198.39
MFAP4	0.00984056	0.0907566	1.01116	0.393939	FALSE	4.98351e-08	1.01116	0.391713	-178.925
SRRM1	0.00987237	0.0908798	-0.344037	0.991736	FALSE	9.91565e-08	-0.344037	0.133334	-478.504
FPR3	0.00988224	0.0908798	0.447975	0.597796	FALSE	1.29525e-07	0.447975	0.173639	-394.17
CXorf56	0.00992475	0.0911401	1.32106	0.0578512	FALSE	9.47765e-06	1.32106	0.512348	-71.8854
B3GNT5	0.00997677	0.091487	-0.477444	0.53168	FALSE	3.97445e-08	-0.477444	0.185298	-347.03
MTX1	0.0100148	0.0917049	-0.465955	0.410468	FALSE	1.50387e-07	-0.465955	0.180931	-281.245
RIN2	0.0100775	0.0921474	-1.0088	0.123967	FALSE	1.96321e-07	-1.0088	0.392049	-143.464
TRIP12	0.0101486	0.0926658	-0.636459	0.242424	FALSE	1.19727e-07	-0.636459	0.24758	-214.536
FPR1	0.0101638	0.0926722	-0.400489	1.00275	FALSE	1.1626e-08	-0.400489	0.15582	-490.632
EIF5AL1	0.0102095	0.0929166	0.730062	0.173554	FALSE	6.5256e-07	0.730062	0.28422	-170.867
LILRB4	0.0102195	0.0929166	0.513545	0.4573	FALSE	1.256e-08	0.513545	0.199954	-308.227
BTF3L4	0.0102515	0.0929439	-0.433981	0.548209	FALSE	3.4489e-07	-0.433981	0.169046	-340.432
OAT	0.0102397	0.0929439	0.751134	0.15978	FALSE	1.97929e-07	0.751134	0.29254	-151.438
ADIPOR2	0.0102762	0.0930361	-0.82943	0.170799	FALSE	3.5089e-08	-0.82943	0.323189	-164.205
CDCP1	0.0103728	0.0937785	-0.865918	0.146006	FALSE	2.0114e-07	-0.865918	0.337834	-155.178
MT1X	0.0104223	0.0940943	-0.5108	5.1157	FALSE	1.71293e-07	-0.5108	0.199415	-870.234
RPL19	0.0104803	0.0944843	0.155349	11.854	FALSE	3.52111e-07	0.155349	0.0606935	-1136.95
NCKAP1L	0.0105354	0.0947149	-0.534841	0.333333	FALSE	1.27963e-07	-0.534841	0.209106	-264.594
IL4I1	0.0105259	0.0947149	0.987258	0.112948	FALSE	2.67673e-08	0.987258	0.385941	-125.742
GOLGA7	0.0105939	0.0950126	0.564753	0.275482	FALSE	3.62587e-07	0.564753	0.220968	-235.051
EPS8	0.0105981	0.0950126	1.35879	0.0853994	FALSE	1.22267e-08	1.35879	0.531673	-89.8869
HERC5	0.0106268	0.0951373	-1.13455	0.110193	FALSE	4.2514e-09	-1.13455	0.444098	-112.639
LILRB1	0.010662	0.0953197	1.0587	0.0881543	FALSE	2.05403e-07	1.0587	0.414596	-110.053
KIDINS220	0.0106903	0.0953555	0.978163	0.101928	FALSE	3.69129e-07	0.978163	0.383193	-123.132
RPP25L	0.0106957	0.0953555	0.987821	0.0909091	FALSE	4.13545e-07	0.987821	0.387003	-108.54
TPI1	0.0107138	0.095384	0.206672	3.4022	FALSE	1.82061e-07	0.206672	0.0809876	-761.525
PPP1CB	0.0107377	0.0954648	-0.476183	0.597796	FALSE	6.46538e-08	-0.476183	0.186656	-374.863
HDAC6	0.010795	0.0958414	-1.58581	0.0550964	FALSE	0.00287689	-1.58581	0.622064	-14.4672
TNFRSF1B	0.0109019	0.0965228	0.631551	0.225895	FALSE	2.00334e-07	0.631551	0.248073	-213.389
ACAT2	0.0108929	0.0965228	-0.705216	0.110193	FALSE	0.175306	-0.705216	0.276977	0
IDNK	0.0109173	0.0965266	-1.40024	0.0633609	FALSE	1.38986e-09	-1.40024	0.55012	-76.3989
STT3A	0.0109481	0.096533	-0.940485	0.110193	FALSE	2.16034e-08	-0.940485	0.369637	-116.008
RAB5C	0.0109443	0.096533	0.311294	1.07989	FALSE	1.01676e-06	0.311294	0.122341	-488.393
CERS6	0.0109632	0.0965332	-0.850484	0.132231	FALSE	9.83792e-08	-0.850484	0.334327	-139.418
DPH3	0.0109986	0.0967121	-0.492511	0.421488	FALSE	2.3651e-07	-0.492511	0.193693	-300.789
COL6A3	0.0111217	0.0972621	1.03508	0.22865	FALSE	3.40052e-07	1.03508	0.407698	-143.397
SNRPF	0.0110769	0.0972621	0.371003	0.705234	FALSE	9.79855e-07	0.371003	0.146049	-401.277
DYNLL2	0.0111217	0.0972621	-0.942352	0.110193	FALSE	3.06403e-07	-0.942352	0.371173	-125.372
ZFAS1	0.0110953	0.0972621	0.292566	1.59504	FALSE	5.44119e-08	0.292566	0.115198	-605.527
AP1S2	0.011241	0.0981718	0.345485	1.00275	FALSE	2.5184e-07	0.345485	0.13628	-474.518
HMGXB4	0.0113142	0.0986765	0.829943	0.134986	FALSE	6.52197e-07	0.829943	0.327673	-144.563
SAR1A	0.0113579	0.0987892	-0.395563	0.628099	FALSE	2.70933e-07	-0.395563	0.156257	-375.583
EDEM2	0.0113489	0.0987892	-0.588832	0.297521	FALSE	5.12091e-07	-0.588832	0.232577	-233.801
PILRA	0.011427	0.0992554	-0.469199	0.487603	FALSE	6.42213e-07	-0.469199	0.185501	-330.531
FAM198B	0.0114688	0.0993498	1.34085	0.0743802	FALSE	7.80382e-09	1.34085	0.530383	-88.8476
PAPD5	0.0114654	0.0993498	1.03754	0.0936639	FALSE	3.58741e-07	1.03754	0.41039	-113.294
UBE2G1	0.0115009	0.0994099	-0.927978	0.134986	FALSE	6.55154e-08	-0.927978	0.367211	-138.717
TECR	0.0115067	0.0994099	-0.39232	0.545455	FALSE	7.37918e-07	-0.39232	0.155256	-329.368
NAA50	0.0115501	0.0995747	-0.51286	0.443526	FALSE	2.3823e-07	-0.51286	0.203065	-316.838
HDDC2	0.0115568	0.0995747	-0.527	0.369146	FALSE	3.34885e-07	-0.527	0.20868	-266.939
HK3	0.0115795	0.0996364	-1.02075	0.0936639	FALSE	0.0800241	-1.02075	0.404304	0
CREB3	0.011612	0.0996906	0.661749	0.168044	FALSE	0.0374611	0.661749	0.262212	-65.3137
YARS2	0.0116169	0.0996906	-0.637958	0.0661157	FALSE	0.327764	-0.637958	0.252799	-51.5433
PSMD12	0.0116628	0.0998623	-0.541827	0.30303	FALSE	3.06494e-07	-0.541827	0.214825	-239.278
FXYD1	0.011668	0.0998623	0.945282	0.157025	FALSE	9.58509e-09	0.945282	0.37481	-135.314
SUB1	0.0117419	0.100361	0.245606	1.97521	FALSE	1.16097e-07	0.245606	0.0974701	-640.405
LRRC47	0.0118049	0.100531	-1.57675	0.0550964	FALSE	0.0607233	-1.57675	0.626212	-49.2781
TNS1	0.0118087	0.100531	0.994808	0.121212	FALSE	9.51907e-08	0.994808	0.395108	-131.097
RPS6KB2	0.0118047	0.100531	0.6462	0.225895	FALSE	1.66193e-07	0.6462	0.256639	-207.221
NCF2	0.0118313	0.10059	-0.349275	0.991736	FALSE	2.37393e-07	-0.349275	0.138759	-476.971
RASGRP2	0.0118656	0.100748	-0.660699	0.206612	FALSE	4.55553e-07	-0.660699	0.262587	-194.365
TTC1	0.0118831	0.100763	-0.448524	0.504132	FALSE	3.93775e-07	-0.448524	0.178297	-330.163
CD302	0.0119544	0.101234	-0.560075	0.352617	FALSE	1.47288e-07	-0.560075	0.222828	-271.532
EEF1B2	0.0120147	0.101477	0.227096	2.68595	FALSE	2.15699e-07	0.227096	0.090415	-716.438
NDUFB5	0.0120065	0.101477	-0.345688	0.809917	FALSE	1.8051e-07	-0.345688	0.137617	-411.397
AGRP	0.0121725	0.102674	-0.834845	0.22865	FALSE	4.60346e-08	-0.834845	0.332992	-202.532
DIAPH1	0.0122276	0.102856	-0.639673	0.236915	FALSE	1.94357e-07	-0.639673	0.255307	-213.343
SPHK1	0.0122349	0.102856	1.29002	0.0606061	FALSE	1.45141e-07	1.29002	0.514918	-80.1971
SOCS6	0.0122421	0.102856	-0.99621	0.101928	FALSE	4.834e-08	-0.99621	0.397674	-117.928
NISCH	0.0122912	0.103134	1.08275	0.0826446	FALSE	2.12353e-07	1.08275	0.432467	-105.945
UQCC2	0.0123138	0.103183	-0.415971	0.534435	FALSE	1.30071e-06	-0.415971	0.166187	-335.609
VIM	0.0123453	0.103183	-0.153719	24.2865	FALSE	1.1795e-07	-0.153719	0.0614355	-1372.3
CCL13	0.012332	0.103183	1.6389	0.410468	FALSE	1.08296e-08	1.6389	0.654906	-138.068
SCOC	0.0124357	0.103804	-0.68107	0.195592	FALSE	5.59008e-07	-0.68107	0.272479	-185.475
GID8	0.0125188	0.104361	0.72518	0.179063	FALSE	9.51205e-08	0.72518	0.2904	-183.207
FAM46A	0.0125408	0.104409	-0.695851	0.206612	FALSE	7.31814e-08	-0.695851	0.278725	-193.156
C12orf49	0.0126147	0.104752	0.823574	0.143251	FALSE	1.18731e-07	0.823574	0.33016	-145.561
TMEM220	0.012602	0.104752	-0.958977	0.112948	FALSE	5.39587e-10	-0.958977	0.384387	-116.312
MTUS1	0.0126648	0.105033	1.0666	0.077135	FALSE	7.84437e-09	1.0666	0.427826	-88.8966
NUCB1	0.0126957	0.105153	-0.337368	0.936639	FALSE	6.02735e-08	-0.337368	0.13537	-440.747
ZNF791	0.0127397	0.105382	1.00852	0.0909091	FALSE	1.0285e-07	1.00852	0.404873	-108.187
MTMR3	0.0127807	0.105585	1.21771	0.0606061	FALSE	2.90787e-07	1.21771	0.489075	-84.5164
SOD3	0.0129413	0.1067	0.905667	0.173554	FALSE	1.58223e-07	0.905667	0.364398	-145.147
TOMM34	0.012949	0.1067	1.18888	0.0661157	FALSE	3.06886e-07	1.18888	0.478392	-89.7881
OPN3	0.0129789	0.106791	-0.507809	0.37741	FALSE	5.9425e-07	-0.507809	0.204403	-283.735
CORO1A	0.0130265	0.106791	0.470404	0.564738	FALSE	7.02131e-08	0.470404	0.189446	-347.12
HMOX1	0.01301	0.106791	-0.458771	1.52066	FALSE	8.15449e-08	-0.458771	0.184728	-577.317
COL6A2	0.0130111	0.106791	0.840672	0.256198	FALSE	6.05885e-09	0.840672	0.338508	-182.989
ADNP	0.0131059	0.107305	-1.28337	0.077135	FALSE	2.94299e-09	-1.28337	0.517305	-93.0008
CH17-189H20.1	0.0132046	0.107852	-1.14138	0.077135	FALSE	0.0552748	-1.14138	0.460566	0
FARSB	0.0132063	0.107852	-0.858597	0.137741	FALSE	2.00151e-07	-0.858597	0.346466	-146.337
NUDT16L1	0.0133227	0.108664	0.50536	0.15427	FALSE	0.209667	0.50536	0.204184	0
SUCO	0.0133938	0.108805	-1.40871	0.0606061	FALSE	2.99777e-07	-1.40871	0.569608	-87.1701
PPP2R5A	0.0134077	0.108805	0.901004	0.112948	FALSE	3.49485e-07	0.901004	0.364373	-129.503
NDUFS1	0.0134078	0.108805	-0.906804	0.107438	FALSE	8.76297e-08	-0.906804	0.366719	-115.228
TXNDC11	0.0133866	0.108805	-0.480239	0.187328	FALSE	0.280928	-0.480239	0.194168	0
CD276	0.0134719	0.109187	-0.746631	0.179063	FALSE	1.13909e-07	-0.746631	0.302152	-176.493
GGCX	0.0135235	0.109467	1.08476	0.0716253	FALSE	1.93005e-07	1.08476	0.439233	-93.6786
EMP1	0.0135649	0.109664	0.345418	1.86226	FALSE	2.85464e-08	0.345418	0.139925	-658.546
RPL37	0.0136365	0.109966	0.16032	9.01653	FALSE	8.42033e-07	0.16032	0.0649939	-1058.94
LMBRD1	0.0136222	0.109966	-0.620382	0.201102	FALSE	3.94008	-0.620382	0.251465	-26.2316
RPL15	0.0136606	0.110022	0.144361	12.9146	FALSE	1.15813e-07	0.144361	0.0585391	-1150.79
CTNNBIP1	0.013742	0.110414	-0.803404	0.129477	FALSE	2.10854e-05	-0.803404	0.326065	-124.528
MARK2	0.0137437	0.110414	1.17476	0.0688705	FALSE	1.27146e-07	1.17476	0.47679	-81.8738
FBXO4	0.0138023	0.110746	1.19595	0.0661157	FALSE	1.75198e-07	1.19595	0.485689	-87.1411
ZFP36	0.0139029	0.111414	0.266321	3.69421	FALSE	5.46983e-08	0.266321	0.108271	-845.621
UBR3	0.013986	0.111642	-1.2327	0.0688705	FALSE	3.74696e-07	-1.2327	0.501583	-90.8671
RBMX2	0.0139997	0.111642	-0.757662	0.151515	FALSE	5.28325e-08	-0.757662	0.308335	-145.201
TRPV2	0.0139506	0.111642	-0.511382	0.38843	FALSE	1.02868e-07	-0.511382	0.208003	-277.441
PCAT19	0.0140009	0.111642	0.967996	0.198347	FALSE	5.32255e-09	0.967996	0.393936	-159.534
RAMP2	0.0140904	0.112216	1.03913	0.181818	FALSE	1.13132e-08	1.03913	0.423278	-145.453
PRRG4	0.0142292	0.113181	-0.524632	0.0743802	FALSE	0.508388	-0.524632	0.214011	-72.7338
SWAP70	0.0142936	0.113552	0.592358	0.23416	FALSE	7.3354e-08	0.592358	0.241799	-204.918
MRPL17	0.0143141	0.113575	0.604675	0.209366	FALSE	1.26911e-06	0.604675	0.246878	-196.021
MROH1	0.0143741	0.11391	-1.38357	0.0606061	FALSE	6.9397e-08	-1.38357	0.565237	-80.2351
CNIH4	0.0144192	0.113986	-0.326935	0.867769	FALSE	4.95943e-08	-0.326935	0.133626	-408.645
TMEM208	0.0144074	0.113986	0.403602	0.545455	FALSE	1.1123e-07	0.403602	0.164942	-351.661
EREG	0.0144781	0.11403	0.490482	1.21763	FALSE	2.94211e-08	0.490482	0.200591	-527.145
CHCHD2	0.0144648	0.11403	0.192518	3.39394	FALSE	3.02082e-07	0.192518	0.078723	-745.669
ANXA1	0.0144488	0.11403	-0.209102	10.3196	FALSE	1.24483e-08	-0.209102	0.0854904	-1165.91
IREB2	0.0144973	0.114042	-0.945781	0.104683	FALSE	4.95441e-07	-0.945781	0.38687	-128.59
RPL12	0.0145634	0.114297	0.150069	12.1102	FALSE	2.12051e-07	0.150069	0.0614267	-1163.15
LYRM1	0.0145653	0.114297	-0.847237	0.132231	FALSE	3.06269e-08	-0.847237	0.3468	-127.295
CIRBP	0.0146191	0.114579	0.274715	1.45179	FALSE	1.38321e-06	0.274715	0.112511	-561.934
BCL7B	0.0146884	0.114982	0.713822	0.157025	FALSE	2.66135e-07	0.713822	0.292554	-156.334
TSPAN4	0.0147867	0.115344	0.435716	0.501377	FALSE	3.61418e-08	0.435716	0.178751	-316.158
CCDC59	0.0147886	0.115344	0.482274	0.338843	FALSE	1.19758e-07	0.482274	0.197855	-263.939
USF2	0.0147874	0.115344	0.613499	0.278237	FALSE	2.40896e-07	0.613499	0.251687	-243.433
PPIA	0.0148403	0.115607	-0.170985	5.92011	FALSE	5.89604e-07	-0.170985	0.0701835	-903.68
NPC2	0.014927	0.116141	0.165025	8.28926	FALSE	4.98272e-08	0.165025	0.0677959	-1030.21
CD9	0.0149804	0.116416	0.238555	5.74931	FALSE	4.75426e-08	0.238555	0.0980559	-989.251
ACBD6	0.015059	0.116614	0.874478	0.110193	FALSE	1.22553e-07	0.874478	0.359726	-127.946
SPTBN1	0.0150561	0.116614	0.787239	0.157025	FALSE	3.30679e-08	0.787239	0.32383	-147.836
GPKOW	0.0150604	0.116614	-0.961835	0.101928	FALSE	3.89328e-08	-0.961835	0.395667	-114.214
LINC00998	0.0151042	0.116812	-0.394374	0.625344	FALSE	9.81983e-08	-0.394374	0.162302	-374.726
IL10RB	0.0151385	0.116937	-0.492631	0.369146	FALSE	6.23707e-08	-0.492631	0.202808	-270.767
MDK	0.015328	0.118116	0.914184	0.15427	FALSE	1.99439e-08	0.914184	0.377055	-137.515
HAUS1	0.0153267	0.118116	-0.836151	0.134986	FALSE	1.63452e-08	-0.836151	0.344866	-140.508
PSMA2	0.0153549	0.118181	-0.359082	0.752066	FALSE	9.19232e-08	-0.359082	0.148142	-404.749
RAB11FIP1	0.0154411	0.118702	-0.432878	0.661157	FALSE	2.05274e-08	-0.432878	0.178738	-397.476
PNRC1	0.0155605	0.119477	0.274736	2.13774	FALSE	1.10666e-08	0.274736	0.113571	-685.279
SLC25A6	0.0156032	0.119519	0.222361	2.64187	FALSE	5.01333e-08	0.222361	0.0919584	-707.923
FNBP1	0.015591	0.119519	0.511857	0.325069	FALSE	5.66163e-08	0.511857	0.211655	-244.14
EMC2	0.0156298	0.11958	-0.744405	0.15427	FALSE	7.18938e-08	-0.744405	0.30793	-155.51
QDPR	0.0158051	0.120667	-0.590384	0.247934	FALSE	5.27143e-08	-0.590384	0.244629	-195.514
GIMAP1	0.0158094	0.120667	0.906484	0.0936639	FALSE	2.03762e-08	0.906484	0.375622	-101.793
EXOC1	0.0158524	0.120851	-0.896224	0.115702	FALSE	2.31043e-07	-0.896224	0.371523	-132.404
LAIR1	0.0158829	0.12094	-0.403795	0.570248	FALSE	3.04997e-07	-0.403795	0.167439	-352.055
LINC00969	0.0159983	0.12153	0.763775	0.14876	FALSE	2.92855e-07	0.763775	0.317057	-152.795
C1R	0.0159806	0.12153	0.80166	0.239669	FALSE	1.69946e-08	0.80166	0.332727	-174.731
LZIC	0.0160459	0.121604	-0.657619	0.190083	FALSE	2.78994e-07	-0.657619	0.273112	-179.222
YWHAB	0.0160301	0.121604	-0.219085	2.17355	FALSE	7.64559e-07	-0.219085	0.0909733	-626.452
POLR1C	0.0160908	0.121657	0.557365	0.0578512	FALSE	0.460741	0.557365	0.231575	-26.8571
MT-CO1	0.0160865	0.121657	-0.149685	55.562	FALSE	3.87838e-08	-0.149685	0.0621889	-1722.54
ARRB1	0.0161375	0.121867	-0.825717	0.132231	FALSE	1.8593e-07	-0.825717	0.343221	-144.353
RASA1	0.016206	0.122018	-1.01797	0.0964187	FALSE	3.68828e-07	-1.01797	0.423407	-120.766
KIAA2026	0.0161902	0.122018	0.84783	0.0606061	FALSE	0.129261	0.84783	0.352587	0
ATP6V1G1	0.0162146	0.122018	0.23715	2.07163	FALSE	2.09582e-07	0.23715	0.0986459	-655.792
ARHGDIA	0.0162454	0.122107	0.303967	1.12397	FALSE	5.77019e-07	0.303967	0.126476	-498.913
CDA	0.0162847	0.122117	0.721184	0.209366	FALSE	1.57323e-07	0.721184	0.300184	-201.963
ARHGEF12	0.0162798	0.122117	1.12266	0.0688705	FALSE	1.92926e-09	1.12266	0.467273	-80.7195
TK1	0.0165243	0.123768	-1.27017	0.190083	FALSE	8.93892e-08	-1.27017	0.529872	-112.336
YPEL5	0.0165728	0.123843	0.436729	0.62259	FALSE	3.11958e-09	0.436729	0.18227	-383.612
C14orf80	0.016559	0.123843	0.498461	0.077135	FALSE	0.516426	0.498461	0.208008	-114.439
RAB6A	0.0166772	0.124478	-0.557309	0.247934	FALSE	3.4485e-07	-0.557309	0.232819	-209.996
HLA-DRA	0.0167329	0.124538	-0.163561	46.7355	FALSE	1.00124e-08	-0.163561	0.0683634	-1652.77
LAMP2	0.0167654	0.124538	-0.310893	1.03581	FALSE	1.03306e-06	-0.310893	0.129982	-479.93
ATP2B1	0.0167823	0.124538	-0.348993	0.873278	FALSE	8.58265e-08	-0.348993	0.145934	-461.526
RILPL2	0.01677	0.124538	0.457221	0.465565	FALSE	3.16798e-08	0.457221	0.191169	-317.158
MMP14	0.0167259	0.124538	0.76578	0.132231	FALSE	1.27495e-07	0.76578	0.320051	-146.863
AKIP1	0.0169207	0.12542	-0.702955	0.157025	FALSE	1.51651e-07	-0.702955	0.294317	-147.253
TMED4	0.0169536	0.125519	-0.640912	0.212121	FALSE	3.95388e-08	-0.640912	0.268421	-191.411
TTC39B	0.0170076	0.125774	-0.750506	0.184573	FALSE	3.83059e-08	-0.750506	0.314474	-183.24
SRGAP1	0.0171618	0.126768	1.0802	0.0798898	FALSE	6.41186e-08	1.0802	0.453253	-91.9076
PDE4DIP	0.0172036	0.126931	-0.673819	0.195592	FALSE	3.17e-07	-0.673819	0.282841	-184.799
CAPZA1	0.0172364	0.127027	-0.326209	0.881543	FALSE	2.5672e-07	-0.326209	0.136969	-451.23
DHRS4	0.0173026	0.127369	0.650845	0.275482	FALSE	1.25187e-08	0.650845	0.27344	-223.469
RFC1	0.0173681	0.127704	-0.750143	0.165289	FALSE	6.6457e-08	-0.750143	0.315342	-166.615
MEF2D	0.0174245	0.127972	1.09869	0.0661157	FALSE	4.12718e-07	1.09869	0.462094	-86.6774
RGS16	0.0174511	0.128021	1.03151	0.181818	FALSE	1.19997e-07	1.03151	0.433943	-152.448
GGCT	0.0175769	0.128797	0.512706	0.316804	FALSE	5.19865e-08	0.512706	0.21593	-248.371
ADTRP	0.0176365	0.129086	-0.986145	0.107438	FALSE	2.86606e-09	-0.986145	0.41554	-112.006
HMGN3	0.0176766	0.129232	-0.334193	0.807163	FALSE	3.61076e-08	-0.334193	0.140872	-408.82
KRT18	0.0178582	0.130412	1.07279	0.123967	FALSE	1.07014e-08	1.07279	0.452933	-111.718
SMIM4	0.0179286	0.130777	0.482466	0.38843	FALSE	4.87779e-08	0.482466	0.203822	-293.254
STX11	0.0180907	0.13166	-0.490854	0.440771	FALSE	2.48432e-08	-0.490854	0.207658	-308.306
CD72	0.0180834	0.13166	1.0656	0.0716253	FALSE	9.42518e-08	1.0656	0.450779	-91.3048
TLR2	0.0182115	0.132291	0.817773	0.143251	FALSE	8.40912e-08	0.817773	0.346324	-154.98
JPX	0.0182392	0.132291	0.389929	0.115702	FALSE	0.817212	0.389929	0.165173	-64.8349
TCEA2	0.0182268	0.132291	1.08829	0.0661157	FALSE	7.06318e-08	1.08829	0.460948	-86.8052
PTPRO	0.018361	0.133024	-1.28504	0.0743802	FALSE	6.77348e-08	-1.28504	0.544911	-90.7635
DYNLRB1	0.0183947	0.133118	-0.298745	0.966942	FALSE	1.91993e-06	-0.298745	0.126717	-451.507
RRM1	0.0184183	0.133138	-1.20588	0.0716253	FALSE	1.32626e-08	-1.20588	0.511596	-86.2308
SSR4	0.0185163	0.133696	0.215358	2.09091	FALSE	2.17796e-06	0.215358	0.0914423	-633.783
SGMS1	0.0185592	0.133856	-0.840731	0.132231	FALSE	3.77448e-09	-0.840731	0.357109	-135.763
NR1D1	0.0186077	0.134055	1.09795	0.0743802	FALSE	1.03795e-07	1.09795	0.466557	-92.7037
TK2	0.0186477	0.134192	-0.917303	0.112948	FALSE	1.80182e-07	-0.917303	0.389927	-131.475
SRSF11	0.0187262	0.134309	0.341648	0.666667	FALSE	4.0428e-07	0.341648	0.145324	-378.641
IMMT	0.0187765	0.134309	-0.59509	0.239669	FALSE	3.2146e-07	-0.59509	0.253236	-210.9
CA2	0.0187895	0.134309	0.960596	0.168044	FALSE	3.01872e-09	0.960596	0.40882	-155.263
THYN1	0.0187777	0.134309	0.29516	0.203857	FALSE	1.06072	0.29516	0.125605	-67.1562
PTPRE	0.0187338	0.134309	0.414806	0.699725	FALSE	2.17926e-07	0.414806	0.176454	-417.386
SLCO3A1	0.0187408	0.134309	-0.796733	0.157025	FALSE	1.18812e-07	-0.796733	0.338942	-162.061
COL4A2	0.0188168	0.134355	0.882529	0.0909091	FALSE	1.62699e-07	0.882529	0.375682	-97.969
LCORL	0.0189226	0.134828	-1.17931	0.0661157	FALSE	0.122118	-1.17931	0.502466	-19.3133
SIDT2	0.018925	0.134828	-0.751266	0.143251	FALSE	2.46215e-08	-0.751266	0.320096	-146.866
MICU1	0.0189481	0.134842	-0.792643	0.126722	FALSE	1.25465e-07	-0.792643	0.337791	-135.862
SEPN1	0.0191327	0.135206	-0.588914	0.220386	FALSE	6.50072e-07	-0.588914	0.251357	-197.768
GBP3	0.0191861	0.135206	-1.17709	0.0661157	FALSE	0.000445357	-1.17709	0.502625	-18.0317
LPCAT1	0.0191887	0.135206	1.01451	0.0853994	FALSE	3.4248e-08	1.01451	0.43321	-105.947
IFIT2	0.0190317	0.135206	-1.28975	0.126722	FALSE	2.91186e-08	-1.28975	0.550023	-123.185
GALNT6	0.0191861	0.135206	-1.17709	0.0661157	FALSE	0.0280616	-1.17709	0.502625	0
COQ5	0.0191657	0.135206	-0.795121	0.118457	FALSE	0.0903359	-0.795121	0.339463	0
DNAJC3	0.0190615	0.135206	-0.505943	0.369146	FALSE	6.30064e-07	-0.505943	0.215816	-282.437
CCL3	0.0191238	0.135206	0.438336	7.73003	FALSE	4.35227e-09	0.438336	0.187074	-1016.55
LINC01272	0.0190647	0.135206	-0.296804	1.47107	FALSE	1.92924e-07	-0.296804	0.126609	-585.78
FO538757.2	0.0192509	0.13535	-0.574115	0.0633609	FALSE	0.309949	-0.574115	0.245281	-78.3603
ZBTB8OS	0.0192514	0.13535	-0.395294	0.564738	FALSE	2.97785e-07	-0.395294	0.168884	-365.688
C1orf35	0.0193326	0.135673	-0.528752	0.280992	FALSE	1.58282e-07	-0.528752	0.226054	-226.476
SRD5A3	0.0193396	0.135673	-0.486324	0.280992	FALSE	0.189039	-0.486324	0.207927	-122.664
TTC17	0.0193821	0.135675	-0.948922	0.0881543	FALSE	0.0204107	-0.948922	0.405852	-97.0698
ELF1	0.0193817	0.135675	0.368573	0.650138	FALSE	1.12e-07	0.368573	0.157637	-387.119
HMGB2	0.0194707	0.136146	-0.411664	0.818182	FALSE	7.62518e-09	-0.411664	0.176196	-397.06
TMEM50A	0.019572	0.136284	-0.276854	1.2314	FALSE	1.54872e-06	-0.276854	0.118595	-521.221
DNAJA4	0.0195377	0.136284	-0.731632	0.31405	FALSE	8.27647e-09	-0.731632	0.313318	-232.946
CD300C	0.0195753	0.136284	-0.640534	0.198347	FALSE	3.04611e-07	-0.640534	0.27439	-190.59
SIRT7	0.0195452	0.136284	-0.721249	0.151515	FALSE	1.60121e-07	-0.721249	0.308891	-155.982
NUS1	0.0196067	0.136355	-0.674505	0.206612	FALSE	5.34723e-08	-0.674505	0.289017	-201.108
ELMOD2	0.01965	0.136508	-0.913996	0.104683	FALSE	1.74605e-08	-0.913996	0.391774	-113.942
PPCS	0.0196743	0.136529	-0.409642	0.490358	FALSE	1.21117e-07	-0.409642	0.175623	-315.765
SRSF7	0.0197326	0.136786	0.302537	1.12948	FALSE	5.30306e-07	0.302537	0.129767	-501.89
TPM2	0.0198557	0.137491	0.610037	0.410468	FALSE	2.84251e-08	0.610037	0.261924	-266.066
CORO1C	0.0200331	0.138569	-0.313299	0.99449	FALSE	7.06948e-07	-0.313299	0.13471	-467.866
LAMTOR3	0.0200587	0.138597	-0.54303	0.289256	FALSE	1.41603e-07	-0.54303	0.233536	-240.843
CYP1B1	0.0201666	0.138745	0.827687	0.134986	FALSE	1.55129e-07	0.827687	0.356265	-145.478
EIF2A	0.0201567	0.138745	-0.500975	0.369146	FALSE	1.71458e-07	-0.500975	0.21562	-280.162
CTD-3252C9.4	0.0201153	0.138745	0.557947	0.363636	FALSE	9.77639e-08	0.557947	0.240061	-277.721
APOC2	0.0201374	0.138745	-1.26061	0.0688705	FALSE	4.92727e-08	-1.26061	0.542483	-88.3262
FLT1	0.020197	0.138805	1.17495	0.0743802	FALSE	3.59514e-09	1.17495	0.505862	-87.6884
PCGF5	0.0203535	0.139582	-0.576063	0.203857	FALSE	0.000819735	-0.576063	0.248328	-180.319
CLN6	0.0203467	0.139582	-0.763871	0.140496	FALSE	2.98775e-08	-0.763871	0.32927	-143.752
TMEM230	0.0203839	0.139641	-0.320057	0.865014	FALSE	6.49384e-07	-0.320057	0.138003	-432.215
EEF1A1	0.0204358	0.139848	0.143749	26.3719	FALSE	1.00424e-08	0.143749	0.0620077	-1426.62
SELPLG	0.0205296	0.14034	-0.455125	0.399449	FALSE	2.14632e-07	-0.455125	0.196469	-280.071
MYOF	0.0205543	0.14036	-0.642592	0.176309	FALSE	1.20737e-07	-0.642592	0.277449	-167.527
MRPL18	0.0207317	0.141421	-0.386163	0.724518	FALSE	1.63003e-08	-0.386163	0.166965	-406.256
MRFAP1	0.0207827	0.141618	0.37871	0.586777	FALSE	2.76212e-07	0.37871	0.163808	-351.432
MCOLN1	0.0208235	0.141746	-0.439225	0.446281	FALSE	2.61659e-07	-0.439225	0.190045	-305.929
ANKRD12	0.0208889	0.14204	0.443581	0.404959	FALSE	5.29922e-08	0.443581	0.192028	-302.068
SLPI	0.0210599	0.143051	0.728597	0.30303	FALSE	6.1326e-08	0.728597	0.315832	-209.943
CD48	0.0211824	0.143579	0.628659	0.258953	FALSE	1.70498e-08	0.628659	0.27277	-230.084
EXOSC9	0.0211605	0.143579	-0.744901	0.140496	FALSE	5.43148e-07	-0.744901	0.323152	-147.746
REPS1	0.0212087	0.143606	-0.940706	0.0881543	FALSE	0.00113632	-0.940706	0.408248	-105.408
UBE2B	0.0213375	0.144186	0.302982	0.815427	FALSE	7.23117e-07	0.302982	0.131619	-419.771
PIK3R5	0.0213512	0.144186	0.82952	0.115702	FALSE	2.14796e-07	0.82952	0.360392	-138.384
ILF3	0.0213618	0.144186	-0.480106	0.349862	FALSE	3.78359e-07	-0.480106	0.208603	-258.285
PEX19	0.021495	0.144191	-0.877263	0.0936639	FALSE	0.128814	-0.877263	0.381555	-41.213
IGFBP5	0.0214062	0.144191	1.11437	0.198347	FALSE	2.46242e-08	1.11437	0.484354	-124.179
MLLT4	0.0214299	0.144191	1.1414	0.0661157	FALSE	1.34239e-07	1.1414	0.496192	-86.464
ACO1	0.0214187	0.144191	-0.883973	0.123967	FALSE	5.26182e-08	-0.883973	0.384249	-130.475
CDC37	0.0214972	0.144191	-0.314761	0.92011	FALSE	6.90157e-08	-0.314761	0.136904	-444.107
DSCR3	0.0214637	0.144191	-0.889094	0.112948	FALSE	7.62711e-08	-0.889094	0.386609	-123.794
UBE2M	0.0215486	0.144385	0.561885	0.220386	FALSE	8.24393e-07	0.561885	0.244486	-202.853
LTBP3	0.0216083	0.144633	0.799599	0.115702	FALSE	2.35544e-08	0.799599	0.348078	-129.734
IL13RA1	0.0217178	0.145064	0.480033	0.327824	FALSE	9.48336e-08	0.480033	0.209141	-261.032
DAD1	0.0217021	0.145064	0.293652	1.08815	FALSE	4.96536e-08	0.293652	0.127923	-484.768
EDEM1	0.021824	0.145622	0.9023	0.0853994	FALSE	4.84263e-07	0.9023	0.393431	-111.097
MED27	0.0218504	0.145646	0.515948	0.0743802	FALSE	0.478746	0.515948	0.225014	-18.3244
ATP5G3	0.0218878	0.145745	-0.204727	2.69146	FALSE	7.67885e-08	-0.204727	0.0893105	-688.974
SNRNP27	0.0219827	0.146073	-0.464554	0.349862	FALSE	1.1237e-06	-0.464554	0.202803	-266.315
MTRNR2L12	0.0219619	0.146073	-1.17413	0.0798898	FALSE	1.08462e-08	-1.17413	0.51249	-95.1865
PFKFB3	0.022052	0.146382	0.717486	0.121212	FALSE	0.0793049	0.717486	0.313385	-97.0783
SCARB2	0.022169	0.147007	-0.371646	0.539945	FALSE	5.58492e-07	-0.371646	0.162471	-324.19
NARS	0.0222984	0.147712	-0.412322	0.517906	FALSE	5.01984e-07	-0.412322	0.180428	-343.009
TIMP2	0.0223803	0.148102	-0.300774	0.867769	FALSE	9.63534e-07	-0.300774	0.131696	-425.577
ZCCHC10	0.0224677	0.148288	-0.483677	0.352617	FALSE	6.39334e-07	-0.483677	0.211919	-273.017
TAF3	0.0224959	0.148288	-0.94209	0.0964187	FALSE	3.25886e-07	-0.94209	0.412855	-116.578
CCDC92	0.0225008	0.148288	-1.0882	0.0743802	FALSE	2.25222e-08	-1.0882	0.476904	-93.5801
APOL4	0.0224648	0.148288	-0.934312	0.104683	FALSE	1.17559e-07	-0.934312	0.409352	-121.413
OXLD1	0.0225562	0.148501	0.809362	0.112948	FALSE	3.14672e-07	0.809362	0.354848	-130.98
NAA10	0.0226353	0.148565	0.466606	0.349862	FALSE	5.45717e-07	0.466606	0.204694	-272.468
TMEM70	0.0226013	0.148565	0.368418	0.528926	FALSE	1.64856e-06	0.368418	0.161579	-338.235
CASP1	0.0226266	0.148565	-0.466806	0.374656	FALSE	1.07301e-06	-0.466806	0.204768	-277.599
RBM47	0.0226803	0.148708	-0.445076	0.435262	FALSE	1.11743e-07	-0.445076	0.195313	-316.484
VMA21	0.0228962	0.14997	-0.426988	0.424242	FALSE	5.92355e-07	-0.426988	0.187674	-297.567
USP7	0.022928	0.150025	-0.844554	0.112948	FALSE	1.21388e-07	-0.844554	0.371292	-129.002
RPL5	0.0231095	0.151059	0.173372	5.14601	FALSE	2.91641e-07	0.173372	0.076321	-899.762
MAGOHB	0.0231819	0.151378	-0.701852	0.151515	FALSE	2.55069e-07	-0.701852	0.309128	-154.52
TBCC	0.0234367	0.152887	0.852935	0.0936639	FALSE	7.83383e-08	0.852935	0.376366	-113.678
CTA-29F11.1	0.023605	0.153828	0.827734	0.121212	FALSE	2.34033e-08	0.827734	0.365688	-137.44
RTN4	0.0236963	0.15411	-0.191236	3.14325	FALSE	9.0307e-08	-0.191236	0.0845421	-745.879
PTMS	0.0236793	0.15411	-0.318759	1.16804	FALSE	1.29898e-07	-0.318759	0.140901	-500.548
EMB	0.0237338	0.154197	0.838001	0.101928	FALSE	4.05639e-08	0.838001	0.370565	-122.267
CD36	0.0237677	0.154262	0.666383	0.325069	FALSE	2.52463e-08	0.666383	0.294747	-256.937
SETX	0.0238144	0.154409	-0.379747	0.132231	FALSE	0.834114	-0.379747	0.168021	-72.0215
RPS11	0.0238457	0.154456	0.157254	6.4573	FALSE	2.07987e-08	0.157254	0.0695933	-957.549
STAMBP	0.0240355	0.154839	-0.835345	0.101928	FALSE	0.0240419	-0.835345	0.370185	-54.1753
THUMPD3	0.0240214	0.154839	-0.833717	0.101928	FALSE	0.0661562	-0.833717	0.369427	0
COPS4	0.0240132	0.154839	-0.584843	0.195592	FALSE	1.68339e-07	-0.584843	0.259133	-183.798
MAPK1IP1L	0.0240442	0.154839	-0.53205	0.250689	FALSE	6.72576e-07	-0.53205	0.235794	-215.865
SNAPC1	0.0240497	0.154839	0.786278	0.173554	FALSE	5.06746e-08	0.786278	0.348476	-169.664
YWHAH	0.023944	0.154839	-0.235397	2.06336	FALSE	2.40327e-07	-0.235397	0.104249	-649.237
TMEM101	0.0241104	0.155075	0.348848	0.132231	FALSE	0.879062	0.348848	0.154675	-71.1846
OSCAR	0.0241433	0.155131	-0.442561	0.438017	FALSE	3.07104e-08	-0.442561	0.196271	-292.006
SOWAHC	0.0241819	0.155224	-1.15591	0.0688705	FALSE	9.57458e-08	-1.15591	0.512776	-87.6939
CCDC107	0.0242185	0.155303	0.432535	0.4573	FALSE	5.95674e-08	0.432535	0.191927	-324.256
PROCR	0.0242575	0.155398	-0.837862	0.137741	FALSE	1.07631e-08	-0.837862	0.371883	-140.476
TLR8	0.024432	0.156352	-1.10981	0.0826446	FALSE	2.53136e-08	-1.10981	0.493191	-99.3714
ARID5B	0.0244551	0.156352	0.402221	0.942149	FALSE	1.76361e-07	0.402221	0.178772	-457.11
SEC23A	0.0246985	0.157751	-0.707109	0.14876	FALSE	4.5301e-07	-0.707109	0.314818	-161.552
BORCS7	0.0248411	0.158504	0.622739	0.181818	FALSE	3.09048e-07	0.622739	0.27753	-162.552
EPB41L2	0.0248868	0.158638	0.997103	0.0826446	FALSE	3.16983e-08	0.997103	0.444509	-99.9455
TMEM91	0.0250131	0.159285	-0.86684	0.104683	FALSE	9.37337e-08	-0.86684	0.386775	-119.198
CKS1B	0.0252276	0.160491	-0.534371	0.391185	FALSE	4.43064e-08	-0.534371	0.238782	-238.532
DGCR6L	0.0252543	0.160502	-0.537937	0.239669	FALSE	7.63755e-08	-0.537937	0.24042	-207.969
SP140	0.0254088	0.160531	-1.24234	0.0688705	FALSE	1.25823e-07	-1.24234	0.555826	-88.3855
CTSL	0.0254067	0.160531	-0.251453	4.40771	FALSE	4.65927e-09	-0.251453	0.112499	-871.658
MLLT10	0.0253534	0.160531	-0.717946	0.137741	FALSE	2.82073e-07	-0.717946	0.321089	-148.861
OSBPL1A	0.0253125	0.160531	-0.674855	0.168044	FALSE	2.23306e-08	-0.674855	0.301732	-165.131
MAPRE2	0.0252973	0.160531	0.854815	0.0964187	FALSE	5.53545e-07	0.854815	0.382154	-120.275
WFDC2	0.0253993	0.160531	1.00289	0.179063	FALSE	1.21072e-07	1.00289	0.448663	-128.757
PDCD10	0.0254717	0.16077	-0.366451	0.545455	FALSE	4.98029e-07	-0.366451	0.164021	-340.986
MAP1LC3A	0.0255224	0.160932	0.758642	0.121212	FALSE	1.1166e-07	0.758642	0.33968	-130.849
MS4A4A	0.0256816	0.161776	-0.248469	2.71901	FALSE	9.38106e-08	-0.248469	0.111372	-739.544
DPY30	0.0259248	0.163148	-0.387355	0.449036	FALSE	1.46662e-06	-0.387355	0.173909	-306.663
YY1AP1	0.0260343	0.163579	1.0859	0.0661157	FALSE	2.14205e-08	1.0859	0.487892	-86.1031
NR4A3	0.0260885	0.163579	0.544983	0.341598	FALSE	3.21421e-07	0.544983	0.244948	-273.608
SSSCA1	0.0260447	0.163579	0.547787	0.231405	FALSE	3.02993e-08	0.547787	0.246136	-195.529
GALNT1	0.0260952	0.163579	-0.60476	0.187328	FALSE	2.76573e-07	-0.60476	0.271828	-178.71
TRNAU1AP	0.0261871	0.163995	0.473592	0.14876	FALSE	0.267549	0.473592	0.213001	0
HSPA9	0.0262574	0.164275	-0.382439	0.473829	FALSE	3.98036e-07	-0.382439	0.172085	-304.773
STK25	0.0263206	0.16451	-0.863371	0.0936639	FALSE	0.0417267	-0.863371	0.388652	0
PCYT1A	0.0264297	0.164871	-0.717185	0.146006	FALSE	5.40828e-08	-0.717185	0.32308	-151.837
CXCL8	0.0264267	0.164871	-0.118381	3.83747	FALSE	0.181722	-0.118381	0.0533275	0
FLOT1	0.0265576	0.165508	0.365686	0.570248	FALSE	7.56727e-08	0.365686	0.164875	-362.2
CARS2	0.0265856	0.165522	-0.704543	0.129477	FALSE	0.0221449	-0.704543	0.317713	-9.41739
RUNX3	0.0270569	0.167632	1.11306	0.0798898	FALSE	8.99674e-08	1.11306	0.50349	-87.859
TTC37	0.0271595	0.167632	-0.859953	0.101928	FALSE	2.10908e-07	-0.859953	0.389257	-118.966
CARD19	0.0271202	0.167632	0.462409	0.360882	FALSE	6.01617e-07	0.462409	0.209255	-282.527
EGFL7	0.0271344	0.167632	0.956831	0.101928	FALSE	9.3956e-08	0.956831	0.433038	-115.319
CAMK1D	0.0271461	0.167632	0.667804	0.112948	FALSE	0.325316	0.667804	0.302255	-86.9506
M6PR	0.0269986	0.167632	-0.314254	0.823691	FALSE	8.38938e-07	-0.314254	0.142098	-430.255
KLC1	0.0270647	0.167632	0.881501	0.0936639	FALSE	8.43758e-08	0.881501	0.398764	-109.989
SLTM	0.0270254	0.167632	-0.406376	0.424242	FALSE	1.08062e-07	-0.406376	0.183785	-293.871
RNF213	0.026981	0.167632	-0.457132	0.37741	FALSE	2.19596e-08	-0.457132	0.206679	-279.5
ARHGEF10L	0.0274778	0.168946	-1.25264	0.0550964	FALSE	7.70811e-08	-1.25264	0.568176	-77.7014
NUDT2	0.0274337	0.168946	-0.437811	0.0964187	FALSE	0.552568	-0.437811	0.198528	-56.5877
CFL1	0.0274467	0.168946	-0.127745	10.3113	FALSE	8.63248e-07	-0.127745	0.0579315	-1049.48
SECTM1	0.0274663	0.168946	-1.01205	0.0798898	FALSE	2.76179e-07	-1.01205	0.459017	-105.487
CS	0.0275066	0.168962	-0.77301	0.123967	FALSE	2.73295e-07	-0.77301	0.350691	-135.756
KRAS	0.0277252	0.170142	0.461001	0.311295	FALSE	1.27146e-06	0.461001	0.209436	-254.292
UGP2	0.0278677	0.170364	-0.295395	0.903581	FALSE	2.07934e-06	-0.295395	0.134323	-445.754
SECISBP2L	0.0278534	0.170364	-0.435433	0.0964187	FALSE	0.306713	-0.435433	0.197983	-18.3383
SNHG9	0.0278185	0.170364	0.477028	0.325069	FALSE	7.84225e-07	0.477028	0.216847	-267.772
SYNGR2	0.0278584	0.170364	-0.260097	1.31129	FALSE	1.93088e-07	-0.260097	0.118265	-529.923
DCAF8	0.0279935	0.170535	-1.22834	0.0550964	FALSE	1.87026e-06	-1.22834	0.559003	-72.4936
ATP1B1	0.0280526	0.170535	-0.692777	0.201102	FALSE	9.38062e-11	-0.692777	0.315393	-176.324
CYTIP	0.0280549	0.170535	0.444958	0.460055	FALSE	2.38434e-07	0.444958	0.202574	-323.333
AK6	0.0280092	0.170535	-0.580533	0.239669	FALSE	7.4889e-08	-0.580533	0.26422	-209.747
TULP4	0.0280013	0.170535	-1.25387	0.0550964	FALSE	1.55518e-07	-1.25387	0.570649	-80.7449
GCNT1	0.0279969	0.170535	-1.2283	0.0550964	FALSE	2.48417e-06	-1.2283	0.558998	-68.9702
LPCAT2	0.0281808	0.171138	-0.510648	0.316804	FALSE	9.21625e-08	-0.510648	0.232667	-255.934
RNF145	0.0284249	0.172457	0.471489	0.371901	FALSE	3.94836e-08	0.471489	0.215157	-284.571
CD81	0.0284869	0.172507	-0.274373	1.2011	FALSE	1.90855e-07	-0.274373	0.125255	-508.252
CPT1A	0.0284691	0.172507	-0.648561	0.0826446	FALSE	0.288606	-0.648561	0.296044	-19.4213
LRP1	0.0287961	0.174215	-0.392607	0.575758	FALSE	8.2566e-08	-0.392607	0.179579	-367.521
CBX3	0.0288906	0.174622	-0.278627	1.10193	FALSE	1.13406e-06	-0.278627	0.12752	-495.58
TUBB	0.0289451	0.174787	-0.253227	2.47107	FALSE	4.32018e-09	-0.253227	0.115934	-670.732
LAMTOR1	0.0289744	0.1748	-0.270373	1.21763	FALSE	3.83274e-07	-0.270373	0.123807	-515.883
CLTC	0.0290053	0.174821	-0.411175	0.440771	FALSE	7.58502e-07	-0.411175	0.188318	-313.942
BTN2A2	0.029267	0.176233	-1.07547	0.0743802	FALSE	1.3657e-08	-1.07547	0.493365	-87.6874
HSPB11	0.0293866	0.176457	-0.441802	0.333333	FALSE	3.21327e-07	-0.441802	0.202823	-257.375
ATG3	0.0293595	0.176457	0.340156	0.61708	FALSE	2.51665e-07	0.340156	0.156133	-381.315
TPST2	0.0293684	0.176457	0.574758	0.192837	FALSE	2.67581e-08	0.574758	0.263831	-178.193
BLOC1S2	0.0296219	0.177325	-0.358728	0.561983	FALSE	3.54832e-08	-0.358728	0.164924	-341.789
HEBP1	0.0296121	0.177325	-0.599096	0.184573	FALSE	5.40918e-08	-0.599096	0.275416	-171.147
RNPS1	0.0296297	0.177325	0.408886	0.429752	FALSE	1.9771e-07	0.408886	0.187993	-301.757
MT1A	0.0296417	0.177325	0.718322	0.286501	FALSE	8.87128e-09	0.718322	0.330286	-203.301
RPL22L1	0.0299112	0.178771	0.336741	0.727273	FALSE	1.14265e-07	0.336741	0.15509	-404.883
PAICS	0.030011	0.1792	0.692597	0.126722	FALSE	6.21041e-07	0.692597	0.319177	-135.008
BTBD7	0.0300967	0.179545	0.911279	0.0881543	FALSE	6.64951e-09	0.911279	0.420173	-108.06
LINC01588	0.0301646	0.179783	-1.02225	0.0716253	FALSE	9.18976e-09	-1.02225	0.471535	-89.0379
MANF	0.0302191	0.179941	0.354551	0.62259	FALSE	5.33781e-07	0.354551	0.163598	-375.414
RPL34	0.0302489	0.179952	0.122868	19.7713	FALSE	3.9434e-07	0.122868	0.0567043	-1313.94
ATF6	0.0304021	0.180696	-0.574321	0.176309	FALSE	0.238204	-0.574321	0.265298	-59.0056
LIMS1	0.0305266	0.180933	0.284803	1.15978	FALSE	9.87215e-08	0.284803	0.131659	-529.599
NR2F2	0.0305194	0.180933	1.12521	0.0881543	FALSE	1.085e-08	1.12521	0.52014	-88.8008
CAPS	0.0304865	0.180933	0.886808	0.0909091	FALSE	5.51217e-08	0.886808	0.409855	-112.109
RNF170	0.0306986	0.181785	0.512616	0.0578512	FALSE	0.433691	0.512616	0.237217	-56.1994
FHL2	0.0307684	0.182018	1.11725	0.077135	FALSE	3.28879e-08	1.11725	0.517233	-88.447
PCSK7	0.0307948	0.182018	-0.619349	0.203857	FALSE	1.08109e-07	-0.619349	0.286774	-201.275
KMO	0.0308952	0.182444	-0.652845	0.179063	FALSE	2.13619e-07	-0.652845	0.302464	-179.802
ADAM8	0.0309479	0.182587	1.0803	0.0550964	FALSE	2.00576e-07	1.0803	0.500664	-78.986
GPATCH11	0.0311693	0.183168	-0.681234	0.165289	FALSE	4.05003e-08	-0.681234	0.316132	-171.472
DMXL1	0.0311267	0.183168	-0.940714	0.077135	FALSE	8.00643e-07	-0.940714	0.436435	-90.2916
FAM126A	0.0312045	0.183168	-0.602267	0.195592	FALSE	6.04312e-08	-0.602267	0.279545	-183.914
GALT	0.0311284	0.183168	-0.940706	0.077135	FALSE	8.419e-08	-0.940706	0.436436	-98.187
CAPN1	0.0312439	0.183168	-0.654467	0.165289	FALSE	9.77794e-08	-0.654467	0.303845	-166.012
MRPL48	0.0312185	0.183168	-0.807417	0.126722	FALSE	7.46094e-08	-0.807417	0.374797	-145.249
PPP1CC	0.0312461	0.183168	-0.396568	0.396694	FALSE	2.15866e-07	-0.396568	0.184114	-269.624
CRCP	0.0313531	0.183628	-0.486577	0.077135	FALSE	0.3098	-0.486577	0.226045	-22.6201
C5orf24	0.0314639	0.184108	0.740281	0.118457	FALSE	4.23527e-07	0.740281	0.344132	-137.162
RNPEP	0.0315222	0.184282	-0.455701	0.352617	FALSE	5.84365e-08	-0.455701	0.211913	-272.636
STAC	0.0315517	0.184286	-0.944208	0.077135	FALSE	3.65147e-05	-0.944208	0.439157	-97.522
CCDC109B	0.0316334	0.184595	-0.352698	0.559229	FALSE	7.31924e-07	-0.352698	0.164121	-349.242
ADCY7	0.0316947	0.184785	-0.725538	0.121212	FALSE	1.00162e-07	-0.725538	0.337736	-134.819
TMEM127	0.0318873	0.185403	-0.648856	0.14876	FALSE	4.28027e-07	-0.648856	0.302381	-155.43
TRIM4	0.0318391	0.185403	-1.10999	0.0633609	FALSE	2.93602e-08	-1.10999	0.517133	-84.451
FAR1	0.031865	0.185403	-0.757561	0.115702	FALSE	1.37042e-07	-0.757561	0.352994	-134.475
C2orf49	0.0319607	0.185519	-0.743034	0.126722	FALSE	2.34196e-07	-0.743034	0.346419	-142.505
SLC2A8	0.031965	0.185519	0.458941	0.0743802	FALSE	0.504969	0.458941	0.213974	-20.3707
TALDO1	0.0320492	0.185839	-0.257902	1.38017	FALSE	8.04103e-07	-0.257902	0.120301	-530.233
DGKZ	0.0320848	0.185877	1.02953	0.0633609	FALSE	1.78951e-07	1.02953	0.480338	-83.95
ZDHHC12	0.0322174	0.186309	-0.486396	0.30854	FALSE	1.01854e-07	-0.486396	0.227107	-238.817
AP1G1	0.0321949	0.186309	-1.14392	0.0606061	FALSE	3.90024e-07	-1.14392	0.534047	-87.8251
NDUFS5	0.0323116	0.186686	-0.185606	2.63912	FALSE	1.62549e-06	-0.185606	0.0867099	-698.568
PIGK	0.0324131	0.186768	-0.861997	0.0991736	FALSE	7.51008e-08	-0.861997	0.402938	-117.415
RHOB	0.0324122	0.186768	-0.254027	1.92562	FALSE	5.26593e-07	-0.254027	0.118744	-645.612
ADH1B	0.0323935	0.186768	1.05292	0.112948	FALSE	2.90465e-08	1.05292	0.492127	-98.0857
SLC25A24	0.0324722	0.186773	-0.479644	0.322314	FALSE	4.43216e-07	-0.479644	0.224285	-257.729
RBX1	0.0324655	0.186773	-0.227906	1.4876	FALSE	4.23016e-07	-0.227906	0.106566	-558.443
C16orf62	0.0325655	0.187142	-0.925395	0.0853994	FALSE	1.34729e-07	-0.925395	0.432954	-105.652
FUOM	0.0326436	0.187423	-0.337119	0.672176	FALSE	7.77299e-08	-0.337119	0.157795	-389.316
LAPTM4A	0.0327749	0.188009	0.191844	2.4573	FALSE	2.00604e-07	0.191844	0.089864	-673.83
RPS27A	0.0329537	0.188078	0.128805	12.5096	FALSE	3.22602e-07	0.128805	0.0603969	-1158.56
HEXB	0.0328253	0.188078	-0.213852	2.22314	FALSE	7.67587e-08	-0.213852	0.100202	-667.409
DCSTAMP	0.0328841	0.188078	-1.09798	0.0633609	FALSE	1.22122e-08	-1.09798	0.514638	-80.2306
TMEM106C	0.032992	0.188078	-0.906171	0.143251	FALSE	2.80233e-08	-0.906171	0.424997	-122.587
PPAN	0.0329796	0.188078	0.715896	0.121212	FALSE	5.50806e-07	0.715896	0.335734	-137.455
SAMM50	0.0329176	0.188078	-0.503351	0.236915	FALSE	5.39173e-07	-0.503351	0.235973	-196.414
MT-CO2	0.0328897	0.188078	-0.147888	35.6033	FALSE	6.28588e-08	-0.147888	0.0693195	-1585.26
GEMIN6	0.0331255	0.188353	-0.770886	0.107438	FALSE	3.89843e-08	-0.770886	0.361823	-120.632
WAS	0.03312	0.188353	-0.519116	0.236915	FALSE	1.23699e-07	-0.519116	0.243645	-211.827
INTS10	0.0331283	0.188353	0.584334	0.162534	FALSE	4.53327e-07	0.584334	0.274267	-156.288
WIPF1	0.0332351	0.188659	0.478584	0.30303	FALSE	7.48473e-07	0.478584	0.224768	-265.421
NBEAL1	0.0332408	0.188659	-0.531572	0.269972	FALSE	4.07088e-07	-0.531572	0.249662	-235.42
UBE2W	0.0333858	0.189314	-0.585172	0.195592	FALSE	1.16888e-07	-0.585172	0.275063	-193.99
MRPL2	0.0334968	0.189588	0.572273	0.203857	FALSE	4.88063e-08	0.572273	0.269169	-192.321
ESAM	0.0334715	0.189588	0.911678	0.0688705	FALSE	1.70036e-07	0.911678	0.428746	-79.6062
CLMN	0.0335227	0.189588	-0.557276	0.0578512	FALSE	0.281324	-0.557276	0.262153	-1.00854
ASNA1	0.0335556	0.189607	-0.341947	0.581267	FALSE	2.90621e-07	-0.341947	0.160888	-349.441
ABHD10	0.0336489	0.189633	-0.994773	0.0688705	FALSE	5.45976e-06	-0.994773	0.468293	-87.8948
PWWP2B	0.0336016	0.189633	1.02621	0.0606061	FALSE	7.31067e-08	1.02621	0.482962	-81.1929
MNAT1	0.0336489	0.189633	-0.994773	0.0688705	FALSE	0.0271448	-0.994773	0.468293	0
BEX4	0.0337192	0.189696	-0.411168	0.506887	FALSE	3.23452e-08	-0.411168	0.193635	-338.761
TFPT	0.0336943	0.189696	-0.453492	0.322314	FALSE	1.03136e-06	-0.453492	0.213537	-259.666
RPL36AL	0.0337714	0.189823	0.173583	3.31956	FALSE	9.66224e-07	0.173583	0.0817711	-771.532
LILRA5	0.0338705	0.190214	-1.1307	0.0688705	FALSE	1.62682e-08	-1.1307	0.532947	-91.8804
SKIV2L2	0.03396	0.190383	-0.799888	0.107438	FALSE	4.10971e-08	-0.799888	0.377208	-125.686
MFGE8	0.0339564	0.190383	0.711295	0.176309	FALSE	2.69506e-08	0.711295	0.335423	-165.29
ATP6V1E1	0.0340471	0.190705	-0.291995	0.876033	FALSE	1.58888e-06	-0.291995	0.137765	-439.866
FAM58A	0.0341433	0.191077	-0.824874	0.0909091	FALSE	0.164173	-0.824874	0.38939	-31.9168
S100A16	0.0342236	0.19136	0.739762	0.137741	FALSE	2.19692e-08	0.739762	0.349369	-133.284
VRK2	0.0345251	0.19243	-0.517155	0.256198	FALSE	3.71643e-08	-0.517155	0.244647	-220.589
SERPINE1	0.0345099	0.19243	0.884124	0.123967	FALSE	1.15294e-08	0.884124	0.418211	-122.368
SLC39A11	0.0345349	0.19243	0.753893	0.104683	FALSE	7.23838e-07	0.753893	0.356658	-128.525
HNRNPM	0.0345137	0.19243	-0.270013	1.16529	FALSE	9.813e-08	-0.270013	0.127725	-507.336
FKBP2	0.0345972	0.19261	0.270106	1.04132	FALSE	1.00051e-07	0.270106	0.127828	-485.992
ABHD3	0.0347573	0.193334	-0.72459	0.112948	FALSE	0.167696	-0.72459	0.343216	0
ARMCX3	0.0348531	0.193699	0.476257	0.250689	FALSE	7.90057e-07	0.476257	0.225707	-222.772
CHKA	0.0349003	0.193793	0.464291	0.0578512	FALSE	0.519348	0.464291	0.220094	-30.5306
CALM3	0.0349882	0.194114	0.291338	0.898072	FALSE	6.58309e-08	0.291338	0.138174	-451.209
CHIT1	0.0350856	0.19438	1.37419	0.289256	FALSE	3.53924e-08	1.37419	0.652089	-144.857
KLF3	0.0351428	0.19438	0.558201	0.239669	FALSE	1.56545e-07	0.558201	0.264964	-220.293
PTBP3	0.0351573	0.19438	-0.476005	0.316804	FALSE	1.42128e-07	-0.476005	0.225965	-260.275
FOS	0.0351378	0.19438	0.201728	10.7851	FALSE	6.70493e-09	0.201728	0.0957523	-1185.11
IMPA1	0.0352616	0.194789	-0.822905	0.0909091	FALSE	9.50837e-07	-0.822905	0.390865	-107.254
AGPAT4	0.0352932	0.194795	-0.822681	0.0909091	FALSE	0.225008	-0.822681	0.390827	0
ALDH1A1	0.0354517	0.195444	-0.546414	0.225895	FALSE	5.1147e-08	-0.546414	0.259806	-198.606
RPS19	0.0354717	0.195444	0.114647	18.8485	FALSE	1.36517e-07	0.114647	0.0545175	-1270.68
SCO1	0.0355237	0.195563	-0.952922	0.077135	FALSE	4.02001e-09	-0.952922	0.453268	-92.76
RPL4	0.0355822	0.195717	0.16902	4.22314	FALSE	2.60858e-07	0.16902	0.0804215	-838.78
WASF2	0.0356738	0.196053	0.338267	0.526171	FALSE	2.52938e-07	0.338267	0.161031	-332.503
C9orf16	0.0357597	0.19619	-0.26123	1.19559	FALSE	6.42655e-07	-0.26123	0.124416	-503.4
TMEM19	0.0357528	0.19619	-0.487746	0.0688705	FALSE	0.383072	-0.487746	0.23229	-48.7543
ACSS2	0.0361633	0.198234	-1.06587	0.0606061	FALSE	0.125145	-1.06587	0.508747	0
IL2RG	0.0364659	0.199267	-0.400261	0.550964	FALSE	3.97812e-07	-0.400261	0.191357	-361.127
TMEM9B	0.0364759	0.199267	-0.353069	0.515152	FALSE	1.3334e-06	-0.353069	0.168805	-334.143
DENND5A	0.0364075	0.199267	-0.58343	0.179063	FALSE	4.67783e-08	-0.58343	0.27884	-172.745
NIN	0.0364156	0.199267	-0.900845	0.0909091	FALSE	1.58391e-08	-0.900845	0.430561	-108.078
DCTD	0.0365454	0.199477	-0.612789	0.157025	FALSE	8.90283e-08	-0.612789	0.293087	-149.812
SFXN3	0.0366186	0.199537	-0.605257	0.176309	FALSE	1.80012e-07	-0.605257	0.289598	-179.243
BCCIP	0.0365887	0.199537	-0.587467	0.187328	FALSE	2.24e-07	-0.587467	0.281041	-185.894
SLC36A4	0.0367469	0.200066	-0.655395	0.179063	FALSE	3.79877e-07	-0.655395	0.313802	-183.241
GTPBP8	0.0368145	0.200175	-0.967558	0.0688705	FALSE	0.104672	-0.967558	0.463431	-36.6872
LDLRAD4	0.0368604	0.200175	0.504826	0.275482	FALSE	4.91731e-07	0.504826	0.241855	-238.705
CTSZ	0.0368557	0.200175	-0.188727	3.83196	FALSE	1.58464e-07	-0.188727	0.0904141	-810.136
PPP1R7	0.0369465	0.200473	-0.434122	0.374656	FALSE	2.3965e-07	-0.434122	0.208077	-276.795
RANGRF	0.0370915	0.20109	-0.315812	0.140496	FALSE	0.996583	-0.315812	0.151486	-80.2743
BCAT1	0.0372054	0.201537	-0.562812	0.209366	FALSE	4.32375e-07	-0.562812	0.270128	-201.725
KCNE3	0.0372864	0.201806	-1.06216	0.0606061	FALSE	9.45908e-08	-1.06216	0.510014	-79.6057
COX15	0.03738	0.202142	-0.42323	0.0881543	FALSE	0.497877	-0.42323	0.203321	-5.16982
DDX19B	0.0374732	0.202475	-0.640987	0.0881543	FALSE	0.14544	-0.640987	0.308082	0
PAG1	0.0375329	0.202627	-0.475437	0.327824	FALSE	4.71548e-08	-0.475437	0.228585	-266.37
MRPS16	0.0375688	0.202651	-0.39441	0.438017	FALSE	2.62601e-07	-0.39441	0.189663	-301.493
PTPN1	0.0377062	0.203221	0.484426	0.242424	FALSE	8.35305e-07	0.484426	0.233117	-214.235
CCM2	0.0377665	0.203375	0.647142	0.140496	FALSE	3.82055e-07	0.647142	0.311519	-159.016
PRMT9	0.0378697	0.20376	0.705723	0.137741	FALSE	4.42498e-08	0.705723	0.339901	-154.896
SOCS3	0.0379289	0.203907	0.319199	1.15978	FALSE	9.452e-09	0.319199	0.153785	-525.951
ICAM1	0.0380719	0.204505	0.451319	0.366391	FALSE	6.12795e-08	0.451319	0.2176	-275.012
ADAMTS9	0.038147	0.204737	1.0338	0.0716253	FALSE	5.37178e-09	1.0338	0.498633	-83.2599
E2F4	0.0381882	0.204787	-0.515072	0.118457	FALSE	0.203403	-0.515072	0.248488	0
RFWD2	0.0383691	0.205532	-0.766649	0.107438	FALSE	1.17586e-07	-0.766649	0.370203	-125.103
NADSYN1	0.0383912	0.205532	-0.881861	0.0826446	FALSE	1.51792e-07	-0.881861	0.425885	-107.871
RPS6KA1	0.0384812	0.20568	-0.562927	0.195592	FALSE	3.26228e-07	-0.562927	0.271986	-185.174
SELM	0.0384828	0.20568	0.46223	0.407713	FALSE	1.08603e-08	0.46223	0.223334	-269.49
NDUFA3	0.0385585	0.205913	-0.218932	1.86226	FALSE	3.03073e-07	-0.218932	0.105822	-631.724
TMCO3	0.0387148	0.206575	-0.82264	0.0909091	FALSE	2.47844e-07	-0.82264	0.397948	-111.491
MAGED2	0.0387521	0.206603	0.539206	0.201102	FALSE	3.87345e-07	0.539206	0.260888	-185.674
PRKACB	0.0388795	0.206621	-0.793291	0.104683	FALSE	2.02508e-07	-0.793291	0.384075	-117.238
MANBA	0.0387914	0.206621	-0.535438	0.181818	FALSE	0.0433352	-0.535438	0.259117	-4.66585
SAC3D1	0.0388479	0.206621	-1.11249	0.0853994	FALSE	4.08176e-08	-1.11249	0.538528	-83.2263
SAP18	0.0389164	0.206621	-0.221204	1.81543	FALSE	1.92935e-07	-0.221204	0.107117	-615.653
ROGDI	0.0388876	0.206621	-0.572267	0.209366	FALSE	1.91323e-07	-0.572267	0.277076	-191.644
LRRC23	0.038955	0.206655	0.928339	0.0661157	FALSE	8.47469e-08	0.928339	0.449632	-85.2499
DNAJC8	0.0391616	0.207529	-0.291073	0.92011	FALSE	1.50165e-07	-0.291073	0.141127	-449.809
RHOH	0.0391844	0.207529	1.00193	0.0716253	FALSE	9.73669e-09	1.00193	0.485845	-88.5234
EIF4G3	0.0394138	0.208571	0.633746	0.151515	FALSE	6.70918e-09	0.633746	0.307668	-146.035
GCA	0.0394648	0.208669	-0.324032	0.785124	FALSE	5.68802e-08	-0.324032	0.15735	-435.945
SEC11A	0.0395386	0.208888	-0.218096	1.71625	FALSE	1.91357e-07	-0.218096	0.105947	-594.227
NECAP2	0.0396176	0.209033	-0.367714	0.402204	FALSE	2.38458e-07	-0.367714	0.1787	-280.026
NCOA1	0.0396312	0.209033	-0.864647	0.0826446	FALSE	1.33635e-07	-0.864647	0.420227	-99.1837
CDC40	0.0398222	0.209831	-0.571049	0.206612	FALSE	2.15779e-07	-0.571049	0.277803	-199.671
VPS25	0.0398479	0.209831	0.426395	0.305785	FALSE	1.01224e-06	0.426395	0.207459	-246.133
PRPF19	0.0399237	0.210058	-0.76025	0.110193	FALSE	1.00032e-07	-0.76025	0.370035	-118.138
CYR61	0.040001	0.210292	0.766168	0.23416	FALSE	4.66757e-08	0.766168	0.37306	-165.563
PRDX3	0.040215	0.211244	-0.31456	0.666667	FALSE	3.31231e-07	-0.31456	0.153329	-381.38
SHARPIN	0.0405059	0.212598	-0.253752	0.212121	FALSE	1.26759	-0.253752	0.123869	-202.982
ARHGAP10	0.0406215	0.21303	-0.597503	0.184573	FALSE	1.26267e-07	-0.597503	0.291839	-182.489
ARL6IP5	0.0406644	0.213081	-0.236134	1.29477	FALSE	9.48916e-08	-0.236134	0.11536	-526.335
NAPRT	0.0407904	0.213567	-0.449615	0.355372	FALSE	1.69241e-08	-0.449615	0.21979	-267.372
RNF5	0.0409884	0.213778	0.49183	0.275482	FALSE	3.37596e-08	0.49183	0.240663	-241.807
ATRX	0.0409644	0.213778	0.570943	0.195592	FALSE	6.67593e-08	0.570943	0.279341	-187.047
ATP6V1D	0.0409503	0.213778	-0.353504	0.504132	FALSE	2.92941e-07	-0.353504	0.172944	-327.734
RORA	0.0409706	0.213778	0.943773	0.0661157	FALSE	7.35818e-08	0.943773	0.461767	-87.0006
BRD4	0.0409971	0.213778	0.436162	0.300275	FALSE	1.15587e-08	0.436162	0.213432	-230.953
COX17	0.0412296	0.214732	-0.242233	1.43802	FALSE	6.77687e-08	-0.242233	0.118671	-580.137
UBAP2	0.0412469	0.214732	0.942622	0.0661157	FALSE	2.26276e-08	0.942622	0.461834	-85.7719
AFF1	0.0413854	0.215103	-0.92347	0.0743802	FALSE	7.6279e-08	-0.92347	0.452759	-95.099
SLCO2B1	0.0413632	0.215103	-0.411799	0.432507	FALSE	2.38043e-08	-0.411799	0.201875	-306.177
SMAD7	0.041443	0.215229	-1.04112	0.0688705	FALSE	2.4812e-08	-1.04112	0.510588	-92.3909
FAM3C	0.0415157	0.215432	0.515244	0.209366	FALSE	7.13778e-08	0.515244	0.252776	-194.801
COX4I2	0.0415594	0.215484	0.958469	0.14876	FALSE	2.59117e-08	0.958469	0.470321	-123.814
MOAP1	0.041908	0.217117	1.00541	0.0606061	FALSE	4.13355e-08	1.00541	0.494198	-81.3033
NDUFB3	0.0419593	0.217207	-0.27881	0.911846	FALSE	3.97216e-08	-0.27881	0.13708	-442.162
PLPP1	0.0420068	0.217278	0.822541	0.0909091	FALSE	1.61032e-08	0.822541	0.404505	-88.2389
JAZF1	0.0421373	0.217602	0.939803	0.0606061	FALSE	5.04223e-08	0.939803	0.462465	-79.4809
CCDC53	0.0421122	0.217602	-0.468936	0.236915	FALSE	4.6129e-07	-0.468936	0.230729	-197.701
TNIP2	0.0422951	0.218242	0.531628	0.209366	FALSE	9.46792e-08	0.531628	0.261808	-196.703
SCAMP1	0.0424511	0.21887	-0.969719	0.0798898	FALSE	2.25303e-07	-0.969719	0.477913	-105.245
PRDX1	0.0425336	0.218944	-0.163105	5.43251	FALSE	1.33422e-07	-0.163105	0.0804162	-905.538
ENG	0.0425236	0.218944	0.331995	0.592287	FALSE	3.13801e-07	0.331995	0.163677	-359.199
MYC	0.0426123	0.21895	0.61299	0.15978	FALSE	4.17155e-08	0.61299	0.302339	-152.596
IDH3A	0.0426109	0.21895	0.745031	0.0909091	FALSE	4.83583e-07	0.745031	0.367462	-108.612
RFXANK	0.0426371	0.21895	-0.569304	0.198347	FALSE	5.37932e-07	-0.569304	0.280826	-193.671
HAT1	0.0427166	0.219008	-0.46607	0.283747	FALSE	1.30919e-07	-0.46607	0.229991	-233.771
NACA	0.0426977	0.219008	0.156288	4.65565	FALSE	1.09391e-07	0.156288	0.077116	-871.273
BRI3	0.0427556	0.219033	-0.202955	2.573	FALSE	3.38488e-08	-0.202955	0.100171	-703.473
CD69	0.0429723	0.219792	0.544477	0.465565	FALSE	1.05901e-07	0.544477	0.269013	-305.275
WIPI1	0.0429604	0.219792	0.795905	0.0991736	FALSE	4.45e-08	0.795905	0.393215	-119.59
TMEM248	0.0430613	0.219952	-0.437918	0.300275	FALSE	3.9067e-07	-0.437918	0.216457	-239.188
AIFM1	0.0430721	0.219952	-0.941076	0.077135	FALSE	4.80545e-08	-0.941076	0.465186	-94.4818
P4HTM	0.0431774	0.220092	0.858999	0.0716253	FALSE	2.54907e-07	0.858999	0.424828	-88.7008
CXCL12	0.0432023	0.220092	0.841004	0.0853994	FALSE	1.06854e-09	0.841004	0.415978	-87.9296
PFN1	0.0431433	0.220092	-0.122587	14.0193	FALSE	2.33986e-07	-0.122587	0.060617	-1185.9
RNF130	0.0432731	0.220277	0.27453	1.00551	FALSE	9.99784e-07	0.27453	0.135834	-492.487
TOPORS	0.0433793	0.22047	-0.659883	0.126722	FALSE	4.66954e-07	-0.659883	0.326668	-144.802
MGME1	0.0433796	0.22047	-0.824695	0.0909091	FALSE	1.10274e-08	-0.824695	0.408258	-103.998
CD55	0.0435451	0.221136	-0.321392	0.85124	FALSE	1.04166e-07	-0.321392	0.159227	-443.471
GPRIN3	0.0436207	0.221345	-0.537462	0.209366	FALSE	1.07068e-07	-0.537462	0.266371	-200.87
SERINC2	0.0438137	0.221973	-0.539889	0.195592	FALSE	5.41082e-07	-0.539889	0.26782	-192.098
RPS27	0.0437922	0.221973	0.116877	27.2094	FALSE	6.19901e-08	0.116877	0.0579723	-1434.21
SIRT1	0.0438937	0.222203	-1.01256	0.0661157	FALSE	1.86861e-08	-1.01256	0.502484	-87.9496
NDUFA13	0.0439482	0.222304	0.204583	1.82645	FALSE	2.38263e-06	0.204583	0.101551	-626.627
PSMD14	0.0440206	0.222454	-0.359329	0.460055	FALSE	4.62852e-07	-0.359329	0.178425	-310.853
NFKB1	0.0440472	0.222454	0.54734	0.23416	FALSE	1.33689e-08	0.54734	0.271816	-212.216
MECR	0.0442522	0.223242	-0.890168	0.0798898	FALSE	5.35869e-08	-0.890168	0.442497	-97.9849
FYB	0.0442727	0.223242	0.367741	0.471074	FALSE	3.38532e-07	0.367741	0.182819	-333.792
GMFG	0.0443095	0.223252	-0.200916	2.50964	FALSE	4.34006e-08	-0.200916	0.0999008	-721.672
RBMS1	0.0444358	0.223713	0.310426	0.597796	FALSE	3.30138e-07	0.310426	0.154444	-358.254
SRM	0.0446734	0.224163	0.409075	0.319559	FALSE	1.24868e-07	0.409075	0.203752	-248.047
ACAP2	0.0446331	0.224163	-0.477884	0.214876	FALSE	0.179778	-0.477884	0.237978	0
LPL	0.0445981	0.224163	-0.363628	0.936639	FALSE	1.7084e-08	-0.363628	0.181051	-463.481
EEF1D	0.0446855	0.224163	0.158312	3.77135	FALSE	5.57977e-07	0.158312	0.0788562	-807.348
GRINA	0.0447457	0.224163	-0.273355	0.917355	FALSE	1.69427e-07	-0.273355	0.136198	-442.388
LGMN	0.0447697	0.224163	0.379111	1.26997	FALSE	4.89772e-09	0.379111	0.188912	-498.201
SIRPA	0.0447648	0.224163	-0.432794	0.30854	FALSE	1.04882e-06	-0.432794	0.215657	-256.098
MAP3K8	0.0448784	0.224532	-0.310644	0.793388	FALSE	1.21197e-07	-0.310644	0.154873	-440.819
RGCC	0.0449226	0.224547	0.206378	8.01653	FALSE	2.00056e-08	0.206378	0.102912	-1121.91
COL18A1	0.0449514	0.224547	0.793146	0.107438	FALSE	2.41455e-07	0.793146	0.395563	-116.527
FAM127A	0.0450331	0.224607	0.463374	0.245179	FALSE	2.0235e-08	0.463374	0.231185	-201.643
RPL23A	0.0450333	0.224607	0.132739	8.45179	FALSE	6.42371e-07	0.132739	0.0662257	-1041.9
TPMT	0.0451058	0.224793	-0.526176	0.217631	FALSE	3.17176e-08	-0.526176	0.262607	-197.641
DUSP6	0.045631	0.227235	-0.465826	0.37741	FALSE	3.91024e-08	-0.465826	0.233054	-295.636
SLC9A3R1	0.0458606	0.228201	-0.810007	0.0991736	FALSE	7.55065e-08	-0.810007	0.405678	-112.499
FAM107A	0.0459284	0.228361	0.975928	0.0909091	FALSE	2.34236e-08	0.975928	0.488929	-91.4493
STK40	0.0460307	0.228693	-0.870975	0.0826446	FALSE	1.31406e-07	-0.870975	0.436554	-110.922
HMGA1	0.0461315	0.229016	0.351591	0.628099	FALSE	1.74007e-07	0.351591	0.176308	-384.931
HSD17B14	0.0461798	0.229079	-0.778809	0.110193	FALSE	8.17536e-08	-0.778809	0.390626	-121.655
GPRC5A	0.0462209	0.229106	0.892678	0.0716253	FALSE	4.74014e-08	0.892678	0.447823	-87.2474
GRPEL1	0.0462917	0.22928	-0.4629	0.292011	FALSE	8.72101e-07	-0.4629	0.232295	-250.268
ENY2	0.046688	0.231064	-0.232993	1.26171	FALSE	1.83618e-07	-0.232993	0.117134	-521.405
ARID4B	0.0469639	0.232251	0.446994	0.267218	FALSE	5.70809e-07	0.446994	0.225002	-232.505
AOC3	0.0471463	0.232973	0.927371	0.077135	FALSE	1.55517e-08	0.927371	0.467193	-88.8739
TMPO	0.0471907	0.233013	-0.6021	0.157025	FALSE	1.33866e-07	-0.6021	0.303388	-157.376
RPL9	0.0472452	0.233103	0.13207	8.64738	FALSE	6.70705e-07	0.13207	0.0665641	-1053.97
RP11-796E2.4	0.0473689	0.233534	0.867387	0.0716253	FALSE	3.58456e-07	0.867387	0.437414	-99.6119
GMNN	0.0474402	0.233706	-0.80268	0.118457	FALSE	7.96684e-09	-0.80268	0.404913	-118.918
PBDC1	0.0477417	0.234402	-0.406274	0.38292	FALSE	1.30959e-07	-0.406274	0.205224	-282.649
CPQ	0.047751	0.234402	0.470892	0.225895	FALSE	2.21852e-08	0.470892	0.237875	-188.991
TCIRG1	0.0478007	0.234402	-0.39961	0.385675	FALSE	2.62953e-07	-0.39961	0.201911	-285.858
BBIP1	0.0477485	0.234402	-0.738747	0.104683	FALSE	1.65263e-07	-0.738747	0.37318	-126.567
SFSWAP	0.0477767	0.234402	0.948529	0.0716253	FALSE	1.75851e-07	0.948529	0.479212	-96.7779
SEMA6B	0.0476562	0.234402	0.872913	0.0826446	FALSE	9.08818e-08	0.872913	0.440771	-100.752
PDLIM1	0.0479243	0.234829	-0.30199	0.848485	FALSE	1.71105e-07	-0.30199	0.152671	-410.323
PLPP5	0.0482051	0.236025	0.561544	0.162534	FALSE	7.79403e-08	0.561544	0.284246	-166.517
RP11-1094M14.11	0.0483328	0.23647	0.893111	0.0716253	FALSE	4.10939e-08	0.893111	0.452338	-95.8908
GSDMD	0.048493	0.237059	-0.389645	0.396694	FALSE	7.26508e-08	-0.389645	0.197486	-285.392
MOB3B	0.0485272	0.237059	-0.317301	0.264463	FALSE	0.895579	-0.317301	0.160844	0
RERE	0.0488887	0.237132	0.799919	0.077135	FALSE	6.41714e-08	0.799919	0.406141	-88.8654
MRTO4	0.0488806	0.237132	0.524636	0.181818	FALSE	5.5472e-07	0.524636	0.266363	-180.196
TMEM87B	0.0487449	0.237132	0.884021	0.0688705	FALSE	2.12257e-07	0.884021	0.448556	-94.3814
MCTS1	0.0488477	0.237132	-0.333142	0.506887	FALSE	9.14103e-07	-0.333142	0.169114	-327.043
SERPING1	0.0488285	0.237132	-0.400565	0.683196	FALSE	4.76725e-09	-0.400565	0.203324	-369.042
NIP7	0.0486922	0.237132	-0.739181	0.0881543	FALSE	0.0701407	-0.739181	0.374976	-74.8979
MLKL	0.0486997	0.237132	-0.897443	0.077135	FALSE	5.46532e-08	-0.897443	0.455275	-98.3062
IRF8	0.0486226	0.237132	-0.441149	0.349862	FALSE	3.20031e-07	-0.441149	0.223719	-266.815
PGS1	0.048599	0.237132	0.825409	0.077135	FALSE	2.96125e-08	0.825409	0.418545	-95.4994
RIOK3	0.0489116	0.237132	-0.486061	0.267218	FALSE	2.99357e-08	-0.486061	0.246811	-229.846
ECI2	0.0491127	0.237884	0.349185	0.115702	FALSE	0.398612	0.349185	0.177467	-24.043
GINM1	0.0491407	0.237884	-0.457897	0.247934	FALSE	1.37418e-07	-0.457897	0.232746	-207.063
ATF3	0.0493327	0.238216	0.253913	1.98623	FALSE	2.12156e-08	0.253913	0.129172	-660.221
MOB1A	0.0493577	0.238216	-0.263871	0.842975	FALSE	2.86462e-07	-0.263871	0.134252	-435.982
TRPT1	0.0493577	0.238216	0.851077	0.0661157	FALSE	0.109427	0.851077	0.433011	0
UFM1	0.0492587	0.238216	-0.333814	0.630854	FALSE	2.97902e-07	-0.333814	0.169764	-389.859
PNO1	0.0494692	0.238507	-0.610533	0.143251	FALSE	3.24045e-07	-0.610533	0.310779	-146.519
TPRA1	0.0495417	0.238507	0.765294	0.0991736	FALSE	1.21166e-07	0.765294	0.389681	-117.391
SMIM3	0.0495445	0.238507	0.593869	0.170799	FALSE	3.04031e-08	0.593869	0.302396	-172.772
TAX1BP1	0.0496745	0.238507	-0.26063	1.01102	FALSE	1.03157e-07	-0.26063	0.132788	-496.25
TOR2A	0.0496168	0.238507	0.767714	0.0909091	FALSE	1.23106e-07	0.767714	0.391042	-104.552
RPS25	0.0496782	0.238507	0.121749	9.3416	FALSE	1.62382e-07	0.121749	0.0620306	-1062.94
PHF20	0.0496122	0.238507	0.523756	0.206612	FALSE	4.04393e-08	0.523756	0.266775	-189.333
CUL3	0.0497583	0.238535	-1.00524	0.0578512	FALSE	0.00108395	-1.00524	0.512348	-73.4242
WIPI2	0.0497388	0.238535	0.601136	0.162534	FALSE	7.48184e-08	0.601136	0.306358	-162.843
R3HDM2	0.049849	0.238792	0.673471	0.121212	FALSE	9.86604e-08	0.673471	0.343387	-131.483
CCNG2	0.0499286	0.238994	0.922253	0.0606061	FALSE	7.50441e-08	0.922253	0.470399	-74.9303
MKRN1	0.0501991	0.239813	-0.505988	0.225895	FALSE	1.32045e-07	-0.505988	0.258386	-207.467
ERP44	0.0502116	0.239813	-0.29342	0.683196	FALSE	1.28331e-07	-0.29342	0.149845	-379.081
ISG20	0.050196	0.239813	0.657986	0.121212	FALSE	1.7138e-07	0.657986	0.336001	-133.341
ATRAID	0.0503089	0.240099	-0.288696	0.741047	FALSE	1.93549e-07	-0.288696	0.147495	-403.127
TOR1AIP2	0.0507076	0.241822	-0.530682	0.179063	FALSE	2.95504e-07	-0.530682	0.271595	-173.521
PSMD2	0.0507965	0.242066	-0.460681	0.278237	FALSE	2.92381e-07	-0.460681	0.23586	-229.358
NIFK	0.0513367	0.244097	0.232871	0.217631	FALSE	1.24069	0.232871	0.119503	-212.911
ANKRD13A	0.051319	0.244097	0.829341	0.0798898	FALSE	1.18406e-07	0.829341	0.425565	-110.484
MIEF1	0.0513337	0.244097	-1.02159	0.0578512	FALSE	1.52708e-07	-1.02159	0.524247	-81.9139
PPA2	0.0514442	0.244182	-0.365629	0.465565	FALSE	9.24141e-08	-0.365629	0.187718	-324.569
FAM20C	0.0515393	0.244182	0.710615	0.110193	FALSE	8.00456e-09	0.710615	0.364987	-122.734
MTCH2	0.0515829	0.244182	-0.33622	0.506887	FALSE	7.20779e-08	-0.33622	0.172722	-319.847
SMIM10L1	0.0515483	0.244182	0.620496	0.126722	FALSE	1.69475e-07	0.620496	0.318712	-136.533
LMAN1	0.0515527	0.244182	-0.508797	0.212121	FALSE	2.80166e-08	-0.508797	0.261343	-185.691
SUMO3	0.051533	0.244182	-0.257272	0.878788	FALSE	4.11243e-07	-0.257272	0.132136	-442.434
SPAG9	0.0516862	0.24449	0.442839	0.286501	FALSE	3.93523e-07	0.442839	0.227595	-242.846
STX10	0.0517686	0.2447	-0.405176	0.344353	FALSE	9.74161e-08	-0.405176	0.208311	-268.315
ARHGAP15	0.0518378	0.244847	0.779558	0.110193	FALSE	4.90603e-09	0.779558	0.400909	-121.115
GMEB1	0.0520406	0.245238	-0.807182	0.0798898	FALSE	0.0422339	-0.807182	0.415474	0
ATF2	0.0520124	0.245238	-0.807233	0.0798898	FALSE	0.0997838	-0.807233	0.41545	0
KIAA1551	0.0520735	0.245238	0.811389	0.0881543	FALSE	2.31298e-07	0.811389	0.417698	-109.178
NELFCD	0.0520431	0.245238	-0.807174	0.0798898	FALSE	0.000811543	-0.807174	0.415474	-91.109
A1BG	0.0521283	0.245317	-0.527989	0.212121	FALSE	1.69744e-07	-0.527989	0.271869	-205.005
PGM2	0.0522243	0.24547	-0.773046	0.0964187	FALSE	5.42713e-08	-0.773046	0.398215	-112.5
TFEC	0.0522375	0.24547	-0.664243	0.132231	FALSE	1.49248e-07	-0.664243	0.342187	-145.743
TM9SF2	0.0522921	0.245547	-0.417567	0.374656	FALSE	3.02175e-07	-0.417567	0.215161	-284.839
KLHL18	0.0525767	0.246341	-0.657675	0.129477	FALSE	4.6173e-08	-0.657675	0.339291	-143.789
THG1L	0.0526036	0.246341	-0.489405	0.0606061	FALSE	0.355942	-0.489405	0.25251	-24.5384
TBC1D9B	0.0525266	0.246341	0.816091	0.0716253	FALSE	5.14285e-07	0.816091	0.420927	-93.6612
WDR11	0.0526146	0.246341	0.729414	0.0826446	FALSE	0.036545	0.729414	0.376361	-2.03443
UBE2K	0.0528097	0.247074	-0.356968	0.404959	FALSE	9.52056e-08	-0.356968	0.184339	-286.114
PSME4	0.0529035	0.247332	-0.683558	0.118457	FALSE	4.14709e-08	-0.683558	0.353131	-130.333
CTNNB1	0.0530684	0.247641	-0.297589	0.917355	FALSE	3.30536e-07	-0.297589	0.153843	-473.728
OSTC	0.0530853	0.247641	0.264689	0.873278	FALSE	1.59958e-07	0.264689	0.136845	-438.584
ETV6	0.0530413	0.247641	0.5852	0.137741	FALSE	1.92264e-07	0.5852	0.302494	-141.668
ALG1	0.0532507	0.248233	-0.503455	0.0578512	FALSE	0.344388	-0.503455	0.260468	-36.6531
PSMG3	0.0536655	0.248542	-0.502983	0.198347	FALSE	2.28253e-07	-0.502983	0.260677	-185.785
RARRES2	0.0535601	0.248542	0.627594	0.352617	FALSE	6.72184e-09	0.627594	0.325115	-210.961
NDUFA1	0.0535339	0.248542	-0.173525	2.50964	FALSE	2.7103e-07	-0.173525	0.0898818	-692.942
PRPF18	0.0536578	0.248542	-0.611234	0.137741	FALSE	7.73539e-08	-0.611234	0.316769	-144.398
KDM5A	0.0535765	0.248542	-0.595621	0.15427	FALSE	1.34526e-07	-0.595621	0.308573	-164.159
RNF10	0.0536364	0.248542	-0.657532	0.129477	FALSE	1.38675e-07	-0.657532	0.340732	-142.249
TMED10	0.0536007	0.248542	-0.2354	1.12121	FALSE	3.76199e-07	-0.2354	0.121966	-496.242
IVD	0.0536542	0.248542	0.901502	0.0606061	FALSE	1.92533e-07	0.901502	0.467192	-82.3151
R3HDM4	0.0534312	0.248542	0.499586	0.187328	FALSE	1.08532e-06	0.499586	0.258663	-189.689
CKAP2	0.0538243	0.248918	-0.827836	0.0964187	FALSE	3.95925e-08	-0.827836	0.42932	-108.307
PRKCB	0.0538183	0.248918	0.917977	0.0578512	FALSE	1.08647e-07	0.917977	0.476056	-81.8556
TMEM9	0.0538669	0.248935	0.778315	0.0826446	FALSE	2.66594e-07	0.778315	0.40371	-102.699
RARA	0.0539126	0.248955	-0.420261	0.30854	FALSE	1.55591e-07	-0.420261	0.21803	-250.758
MKL1	0.0539486	0.248955	-1.00051	0.0633609	FALSE	2.23757e-08	-1.00051	0.51914	-82.1797
GZMB	0.054151	0.249709	1.07887	0.0798898	FALSE	5.13535e-09	1.07887	0.560269	-94.376
PABPC1	0.0542322	0.249904	-0.178351	3.13223	FALSE	1.53815e-08	-0.178351	0.0926508	-763.908
MAP2K3	0.0545762	0.251309	-0.407975	0.393939	FALSE	3.49891e-07	-0.407975	0.21224	-300.798
ETS1	0.0548431	0.252357	0.904449	0.0881543	FALSE	2.04245e-08	0.904449	0.471038	-90.6394
AEBP1	0.0549262	0.252558	0.724246	0.115702	FALSE	2.64107e-09	0.724246	0.377318	-117.84
SNHG8	0.0550558	0.252792	0.271249	1	FALSE	4.74937e-08	0.271249	0.141391	-501.282
CASP4	0.0550207	0.252792	-0.389228	0.374656	FALSE	1.4886e-07	-0.389228	0.202859	-289.577
DNAJC10	0.0552473	0.25349	-0.648049	0.134986	FALSE	3.74538e-08	-0.648049	0.338067	-142.242
SERPINB1	0.0554949	0.254444	-0.266742	0.859504	FALSE	9.76627e-08	-0.266742	0.139292	-426.576
ZDHHC3	0.0556372	0.254764	-0.48454	0.22865	FALSE	3.9624e-07	-0.48454	0.253173	-201.823
HEXIM1	0.0556767	0.254764	-0.535181	0.192837	FALSE	1.29296e-07	-0.535181	0.279679	-185.456
OSM	0.0556837	0.254764	0.66797	0.170799	FALSE	1.30944e-07	0.66797	0.349082	-178.096
C6orf62	0.0557573	0.254919	-0.326404	0.586777	FALSE	5.11708e-07	-0.326404	0.17063	-374.944
RSBN1	0.0560816	0.255673	0.656722	0.104683	FALSE	1.61076e-07	0.656722	0.343761	-118.321
BNIP2	0.0560017	0.255673	-0.339697	0.479339	FALSE	4.39083e-08	-0.339697	0.177757	-314.532
OPA3	0.0560022	0.255673	-0.990537	0.0633609	FALSE	7.07112e-08	-0.990537	0.518329	-80.8446
SLC5A3	0.0560815	0.255673	-0.74424	0.143251	FALSE	6.16938e-09	-0.74424	0.389572	-145.682
HIPK1	0.0561816	0.255947	0.534514	0.170799	FALSE	3.34956e-07	0.534514	0.279905	-166.401
CHP1	0.0563624	0.256589	-0.441428	0.300275	FALSE	8.44988e-08	-0.441428	0.231329	-256.363
GABARAP	0.0565647	0.257327	0.309286	0.561983	FALSE	2.55251e-07	0.309286	0.162213	-356.29
FXYD6	0.0566661	0.257606	0.744848	0.0991736	FALSE	1.27539e-08	0.744848	0.390816	-110.89
SENP5	0.056894	0.258147	-0.852557	0.0798898	FALSE	1.8733e-07	-0.852557	0.447742	-102.122
CSNK1A1	0.0568881	0.258147	-0.293156	0.669421	FALSE	1.61848e-07	-0.293156	0.153955	-378.041
SRP14	0.0569057	0.258147	-0.13176	4.15702	FALSE	1.50714e-06	-0.13176	0.0692005	-787.805
FAM102B	0.0572625	0.258211	-0.840592	0.0716253	FALSE	0.166725	-0.840592	0.442114	0
GPATCH2	0.0572688	0.258211	-0.840622	0.0716253	FALSE	0.0420408	-0.840622	0.442141	0
SLC16A10	0.0570655	0.258211	0.417497	0.449036	FALSE	3.49558e-08	0.417497	0.219411	-323.791
TIMM10B	0.0572538	0.258211	0.803524	0.0743802	FALSE	2.77125e-08	0.803524	0.422603	-92.5314
SMUG1	0.0572613	0.258211	-0.683884	0.129477	FALSE	5.82442e-09	-0.683884	0.35969	-133.037
RAB11A	0.0572491	0.258211	-0.265496	0.785124	FALSE	1.43794e-07	-0.265496	0.139632	-419.734
RNFT1	0.0571299	0.258211	-0.557776	0.168044	FALSE	1.56003e-07	-0.557776	0.293209	-169.881
RAB8A	0.0572818	0.258211	-0.351651	0.393939	FALSE	3.39179e-07	-0.351651	0.184967	-280.232
ATF5	0.057001	0.258211	0.741834	0.118457	FALSE	7.28466e-08	0.741834	0.389761	-143.453
CCND3	0.057448	0.258597	-0.33493	0.490358	FALSE	1.33122e-07	-0.33493	0.176289	-317.766
ATP5EP2	0.0574188	0.258597	-0.844689	0.0853994	FALSE	1.00301e-08	-0.844689	0.444547	-101.382
MTHFD1L	0.0575777	0.258999	0.648708	0.110193	FALSE	1.34224e-07	0.648708	0.341623	-130.852
LSM6	0.0576267	0.259003	-0.326109	0.526171	FALSE	8.48571e-07	-0.326109	0.17177	-344.652
CXorf38	0.0576594	0.259003	-0.493722	0.104683	FALSE	0.197669	-0.493722	0.26009	0
TMEM14C	0.0582331	0.261356	-0.268801	0.768595	FALSE	1.69338e-07	-0.268801	0.141927	-402.484
BAX	0.0582645	0.261356	-0.253745	0.991736	FALSE	3.913e-07	-0.253745	0.133994	-473.036
PARP4	0.0583979	0.261771	-0.77274	0.0881543	FALSE	9.75162e-09	-0.77274	0.408274	-103.326
WDR43	0.0584979	0.261901	0.557072	0.184573	FALSE	7.82891e-08	0.557072	0.294444	-177.346
ANKIB1	0.0585086	0.261901	-0.939565	0.0661157	FALSE	1.95904e-07	-0.939565	0.496633	-89.7101
HSPA1B	0.0586026	0.262139	0.211018	4.68871	FALSE	2.50866e-08	0.211018	0.111581	-947.941
OSBP	0.0591868	0.264568	0.93658	0.0578512	FALSE	2.50627e-07	0.93658	0.496384	-83.7525
CCL5	0.059252	0.264675	0.682192	0.239669	FALSE	1.23751e-09	0.682192	0.361652	-202.754
BTF3	0.059465	0.265225	0.154585	3.36088	FALSE	3.3592e-07	0.154585	0.0820195	-772.239
FBXW11	0.0596029	0.265225	0.650829	0.107438	FALSE	1.69795e-07	0.650829	0.345502	-128.223
SSRP1	0.059623	0.265225	0.619316	0.121212	FALSE	3.52353e-07	0.619316	0.328799	-141.215
TMEM109	0.0595548	0.265225	0.453935	0.253444	FALSE	7.76731e-08	0.453935	0.240933	-210.731
HMOX2	0.0596146	0.265225	-0.376835	0.352617	FALSE	7.58318e-08	-0.376835	0.200058	-253.07
ACAA2	0.0595017	0.265225	-0.357107	0.473829	FALSE	6.62216e-07	-0.357107	0.1895	-311.286
TPM3	0.0599033	0.265638	-0.165836	2.73278	FALSE	6.83233e-07	-0.165836	0.0881403	-708.473
STRN	0.0598502	0.265638	0.871062	0.0661157	FALSE	2.58694e-07	0.871062	0.462864	-85.0092
UNC50	0.0598555	0.265638	-0.509892	0.225895	FALSE	3.31797e-07	-0.509892	0.270952	-204.652
TMEM42	0.0598524	0.265638	0.642498	0.0578512	FALSE	0.157152	0.642498	0.341413	-52.3721
C20orf24	0.0599227	0.265638	-0.262045	0.829201	FALSE	5.99166e-07	-0.262045	0.139285	-429.598
TMEM43	0.0600614	0.265937	-0.652044	0.118457	FALSE	4.00431e-07	-0.652044	0.346769	-132.185
RAD23B	0.060073	0.265937	-0.403603	0.347107	FALSE	3.06534e-07	-0.403603	0.214653	-263.967
RER1	0.0601692	0.266034	-0.290407	0.680441	FALSE	2.1438e-07	-0.290407	0.154509	-381.211
RPS23	0.0601778	0.266034	0.11308	12.3251	FALSE	3.82077e-07	0.11308	0.0601653	-1146.54
UTRN	0.0603685	0.266694	0.748842	0.0991736	FALSE	3.82855e-08	0.748842	0.398725	-107.137
SLA	0.0604269	0.266768	-0.371597	0.424242	FALSE	3.34101e-07	-0.371597	0.197904	-300.192
BST2	0.0605954	0.267328	0.253355	1.14876	FALSE	1.55148e-08	0.253355	0.135019	-506.91
SNHG7	0.0607321	0.267747	0.538144	0.170799	FALSE	4.62768e-08	0.538144	0.286943	-169.608
BCAS2	0.0608466	0.267969	0.372309	0.476584	FALSE	8.58854e-09	0.372309	0.198606	-318.577
PALLD	0.0608659	0.267969	0.803189	0.0909091	FALSE	8.952e-09	0.803189	0.428489	-101.87
ATP6V1A	0.061168	0.269114	-0.433831	0.286501	FALSE	2.36977e-07	-0.433831	0.231713	-241.534
GLS	0.0614215	0.269173	0.591017	0.132231	FALSE	1.47549e-07	0.591017	0.315976	-145.27
SKIL	0.0613908	0.269173	-0.353161	0.509642	FALSE	3.79631e-08	-0.353161	0.188788	-341.365
ZFX	0.0614076	0.269173	-0.886676	0.0633609	FALSE	0.000374642	-0.886676	0.474019	-83.9265
ATP6V1H	0.061387	0.269173	-0.51098	0.201102	FALSE	6.46203e-08	-0.51098	0.273149	-185.946
PNN	0.0614329	0.269173	0.435138	0.278237	FALSE	3.31339e-07	0.435138	0.232648	-238.717
ITPK1	0.0612532	0.269173	-0.752307	0.0936639	FALSE	4.74407e-08	-0.752307	0.401946	-116.678
LY86	0.0616779	0.270062	-0.293766	0.859504	FALSE	2.18214e-08	-0.293766	0.157211	-434.7
ECSIT	0.0617881	0.27036	0.815211	0.0716253	FALSE	7.77503e-08	0.815211	0.436452	-95.5067
LPAR6	0.0618558	0.270472	0.779267	0.0991736	FALSE	2.30291e-08	0.779267	0.417316	-109.508
SLC38A10	0.061928	0.270603	-0.604222	0.121212	FALSE	4.39893e-06	-0.604222	0.323665	-133.446
SMIM15	0.0620269	0.270667	-0.446319	0.261708	FALSE	2.47305e-07	-0.446319	0.239172	-227.003
RPL27	0.0620008	0.270667	0.124747	7.23416	FALSE	1.00584e-08	0.124747	0.0668424	-986.917
GTF2B	0.0628576	0.272808	-0.389596	0.426997	FALSE	1.4968e-07	-0.389596	0.209438	-292.229
RCHY1	0.0627615	0.272808	-0.883642	0.0633609	FALSE	0.0701589	-0.883642	0.474852	-52.6025
SRP19	0.0628153	0.272808	-0.395302	0.338843	FALSE	6.4311e-08	-0.395302	0.212471	-267.437
TMEM14B	0.0628128	0.272808	-0.293461	0.625344	FALSE	1.51557e-06	-0.293461	0.157731	-373.695
CDK5	0.0627929	0.272808	-0.883547	0.0633609	FALSE	7.80002e-08	-0.883547	0.474858	-76.7333
EDF1	0.0627702	0.272808	0.170035	1.84298	FALSE	1.40652e-06	0.170035	0.0913767	-582.306
KDM2B	0.0628268	0.272808	-0.724127	0.0936639	FALSE	2.53771e-07	-0.724127	0.389229	-114.458
KRT10	0.0627555	0.272808	0.341073	0.446281	FALSE	4.86287e-07	0.341073	0.183282	-300.124
FBP1	0.0629109	0.272855	-0.210271	5.63912	FALSE	4.70688e-09	-0.210271	0.11306	-970.311
RSF1	0.0630058	0.273082	0.435436	0.220386	FALSE	1.41301e-07	0.435436	0.234212	-191.5
FKBP4	0.0630859	0.273245	0.418609	0.258953	FALSE	1.0179e-06	0.418609	0.22523	-220.16
COX20	0.0632098	0.273597	-0.361112	0.410468	FALSE	4.25546e-07	-0.361112	0.194386	-294.169
MED13L	0.0634287	0.274198	0.787674	0.0936639	FALSE	2.25517e-07	0.787674	0.424353	-110.422
U2AF1L4	0.0634341	0.274198	0.774497	0.0798898	FALSE	5.25825e-07	0.774497	0.417263	-106.921
MPG	0.0636241	0.274834	0.411773	0.283747	FALSE	3.11326e-07	0.411773	0.222004	-235.393
IL3RA	0.0637316	0.275113	0.295146	1.4022	FALSE	1.43361e-08	0.295146	0.15919	-571.556
MOCS2	0.0640959	0.276128	-0.575036	0.165289	FALSE	4.01257e-07	-0.575036	0.310576	-163.828
REEP5	0.0640535	0.276128	-0.206462	1.47383	FALSE	2.09657e-07	-0.206462	0.111492	-548.922
APH1B	0.0640353	0.276128	-0.526217	0.192837	FALSE	5.03287e-08	-0.526217	0.284145	-178.253
GCLM	0.064312	0.276503	-0.915149	0.0688705	FALSE	1.09106e-07	-0.915149	0.494673	-86.2499
LYPLA1	0.0642303	0.276503	-0.409181	0.278237	FALSE	4.89856e-07	-0.409181	0.22111	-227.972
LYZ	0.0643065	0.276503	-0.191554	33.8127	FALSE	9.14129e-08	-0.191554	0.10354	-1648.64
MFSD5	0.0644987	0.27712	-0.373878	0.0798898	FALSE	0.472752	-0.373878	0.202236	-70.6601
DDX23	0.0647455	0.277994	-0.948953	0.0633609	FALSE	6.74817e-09	-0.948953	0.513778	-83.0596
KIAA1143	0.0648625	0.278311	-0.536312	0.157025	FALSE	1.93695e-07	-0.536312	0.290494	-154.996
RAB7A	0.0650641	0.278935	-0.186896	1.55923	FALSE	1.34998e-07	-0.186896	0.101309	-543.412
RPL7L1	0.0651361	0.278935	0.465842	0.220386	FALSE	3.04933e-08	0.465842	0.252582	-196.417
AP1B1	0.0651385	0.278935	0.491927	0.198347	FALSE	7.40002e-07	0.491927	0.266727	-195.532
KYNU	0.0652724	0.279322	-0.318107	0.630854	FALSE	8.40015e-07	-0.318107	0.172566	-387.856
MLH1	0.0654066	0.279524	-0.966428	0.0550964	FALSE	2.13189e-07	-0.966428	0.524529	-76.9815
ANXA11	0.0654002	0.279524	-0.227032	1.27824	FALSE	2.53019e-07	-0.227032	0.123219	-544.152
SLK	0.0654558	0.279548	0.606566	0.132231	FALSE	1.06501e-07	0.606566	0.329274	-138.726
C19orf25	0.0655526	0.279775	-0.319842	0.118457	FALSE	0.413652	-0.319842	0.173688	-26.8304
RPA3	0.0657458	0.280227	-0.37282	0.451791	FALSE	3.75252e-07	-0.37282	0.202603	-275.545
XRN2	0.0657037	0.280227	-0.293084	0.581267	FALSE	7.75916e-08	-0.293084	0.159247	-346.07
MPC2	0.0659236	0.280526	-0.332117	0.487603	FALSE	1.7265e-08	-0.332117	0.180602	-309.527
GTPBP6	0.0659803	0.280526	0.575056	0.132231	FALSE	3.03213e-07	0.575056	0.312775	-136.899
CYBB	0.0659325	0.280526	-0.224077	2.00275	FALSE	2.19387e-08	-0.224077	0.121855	-689.292
CXorf40B	0.0659908	0.280526	0.851054	0.0578512	FALSE	0.028094	0.851054	0.46291	0
C4orf27	0.066193	0.280828	-0.596503	0.143251	FALSE	2.05406e-08	-0.596503	0.324695	-143.122
FAM105A	0.0661429	0.280828	-0.554617	0.165289	FALSE	4.94663e-07	-0.554617	0.30184	-171.896
ARPC1B	0.06616	0.280828	-0.143773	3.80441	FALSE	9.0576e-08	-0.143773	0.0782504	-790.275
IQGAP2	0.0663287	0.280912	-0.415134	0.30854	FALSE	3.44652e-08	-0.415134	0.226084	-251.401
MMP19	0.066344	0.280912	-0.322559	0.672176	FALSE	1.28614e-07	-0.322559	0.175677	-401.705
BLOC1S6	0.0663311	0.280912	0.476587	0.247934	FALSE	1.87047e-08	0.476587	0.259554	-215.53
PIEZO1	0.0664326	0.281101	-0.85183	0.0853994	FALSE	9.50981e-08	-0.85183	0.464088	-106.517
YTHDF2	0.0665391	0.281367	-0.394787	0.300275	FALSE	1.00153e-07	-0.394787	0.215169	-245.385
LPXN	0.0665863	0.281381	-0.295323	0.592287	FALSE	3.85721e-07	-0.295323	0.160987	-356.069
C3orf17	0.0666318	0.281388	0.739939	0.077135	FALSE	1.83285e-08	0.739939	0.403424	-95.3521
B3GNT2	0.0667778	0.281634	-0.53795	0.14876	FALSE	1.2055e-07	-0.53795	0.293454	-152.002
ATP13A1	0.0667691	0.281634	-0.902156	0.0633609	FALSE	1.1849e-07	-0.902156	0.492114	-89.0372
IFI44	0.0671748	0.282196	-0.607344	0.15427	FALSE	2.26876e-08	-0.607344	0.331791	-158.242
RARRES1	0.0670749	0.282196	0.760984	0.104683	FALSE	4.14051e-09	0.760984	0.415572	-117.552
MFSD10	0.0671087	0.282196	-0.344088	0.402204	FALSE	2.29588e-08	-0.344088	0.187929	-273.502
COX7A2	0.067097	0.282196	-0.145116	3.90909	FALSE	1.8968e-07	-0.145116	0.079254	-811.649
TLR4	0.0671744	0.282196	-0.492392	0.214876	FALSE	1.56031e-07	-0.492392	0.268992	-208.093
STAT3	0.0671567	0.282196	0.330648	0.504132	FALSE	1.29032e-07	0.330648	0.18062	-330.52
DEFB1	0.0674144	0.283017	-0.479426	0.680441	FALSE	9.06227e-08	-0.479426	0.262139	-349.207
YWHAZ	0.0676527	0.283646	0.184738	1.93939	FALSE	1.90922e-07	0.184738	0.101098	-632.578
PIAS2	0.0676406	0.283646	-0.845258	0.0716253	FALSE	1.05947e-07	-0.845258	0.462548	-94.3983
IRAK3	0.0677293	0.283782	-0.471532	0.206612	FALSE	1.14976e-07	-0.471532	0.258119	-199.039
PRRC2C	0.0679489	0.284517	0.29645	0.595041	FALSE	1.44331e-07	0.29645	0.162408	-354.993
CDK12	0.0681678	0.285247	-0.564583	0.146006	FALSE	2.66058e-07	-0.564583	0.309548	-153.755
USP3	0.0683261	0.285723	-0.458242	0.258953	FALSE	7.24874e-07	-0.458242	0.251387	-238.647
MRPS35	0.0684167	0.285916	-0.407184	0.316804	FALSE	1.22228e-07	-0.407184	0.223451	-257.826
CRYBG3	0.0685052	0.2861	-0.940706	0.0550964	FALSE	0.0649733	-0.940706	0.516398	-34.238
SF3A3	0.0689948	0.287178	-0.451834	0.195592	FALSE	8.5363e-06	-0.451834	0.248471	-173.864
SRGAP2	0.0689716	0.287178	0.803871	0.0633609	FALSE	3.85998e-05	0.803871	0.442026	-87.0987
PSMD1	0.0689959	0.287178	-0.432532	0.236915	FALSE	5.94836e-08	-0.432532	0.237858	-199.056
CD83	0.0690187	0.287178	0.233899	1.75482	FALSE	1.96828e-07	0.233899	0.128636	-643.896
VPS41	0.0690025	0.287178	-0.708248	0.0991736	FALSE	1.41948e-07	-0.708248	0.389489	-117.334
RPS20	0.0690318	0.287178	-0.113606	8.26997	FALSE	1.57913e-08	-0.113606	0.0624824	-1008.49
USP42	0.0691159	0.287341	0.876173	0.0661157	FALSE	2.16306e-08	0.876173	0.482033	-87.9338
VEGFB	0.069216	0.287571	-0.663895	0.112948	FALSE	9.3007e-09	-0.663895	0.365378	-126.18
PRPF8	0.069296	0.287717	-0.700286	0.110193	FALSE	5.70333e-09	-0.700286	0.385517	-120.806
FUNDC2	0.0694649	0.288232	-0.350346	0.369146	FALSE	2.69289e-07	-0.350346	0.192987	-263.783
ITGAV	0.0696802	0.288295	0.59108	0.115702	FALSE	7.52706e-07	0.59108	0.325846	-131.566
ASB1	0.0696987	0.288295	0.40945	0.0578512	FALSE	0.491287	0.40945	0.225733	-13.7264
POLK	0.0696737	0.288295	-0.758814	0.077135	FALSE	0.0331698	-0.758814	0.418304	0
SVIP	0.0697047	0.288295	0.459221	0.225895	FALSE	1.10216e-07	0.459221	0.253178	-204.676
VAMP2	0.0695458	0.288295	0.310494	0.550964	FALSE	1.30081e-07	0.310494	0.171085	-357.458
UBN1	0.0697539	0.288313	0.705271	0.112948	FALSE	8.89267e-09	0.705271	0.388899	-128.77
DDX10	0.0698808	0.288466	0.638103	0.129477	FALSE	1.5401e-08	0.638103	0.352022	-134.523
DDHD1	0.0698417	0.288466	0.619524	0.129477	FALSE	1.67467e-07	0.619524	0.341724	-141.553
GTDC1	0.0701547	0.289411	-0.959821	0.0550964	FALSE	1.77271e-07	-0.959821	0.530021	-78.636
ACTR2	0.0704585	0.290477	-0.215707	1.24242	FALSE	7.41543e-08	-0.215707	0.119244	-527.483
CEPT1	0.0705102	0.290504	-0.759191	0.0826446	FALSE	1.93947e-07	-0.759191	0.419763	-112.383
OSBPL8	0.0706978	0.29096	0.383774	0.396694	FALSE	4.58405e-07	0.383774	0.212333	-300.563
CCDC57	0.0707116	0.29096	-0.777341	0.0798898	FALSE	4.50485e-07	-0.777341	0.430106	-103.614
RBBP4	0.0707978	0.291128	-0.370241	0.344353	FALSE	6.09849e-07	-0.370241	0.204919	-265.654
MTHFD2L	0.0708596	0.291196	0.63748	0.0936639	FALSE	0.0501951	0.63748	0.352905	0
CSRNP1	0.0711595	0.291512	0.382112	0.316804	FALSE	3.2011e-07	0.382112	0.21176	-258.48
TMEM173	0.0710835	0.291512	-0.340136	0.449036	FALSE	2.58627e-07	-0.340136	0.188447	-302.251
FBXO9	0.0711707	0.291512	-0.565859	0.126722	FALSE	0.225891	-0.565859	0.313602	-24.4597
TMEM181	0.0711143	0.291512	0.905993	0.0606061	FALSE	6.76902e-08	0.905993	0.502006	-85.0574
PES1	0.070983	0.291512	0.544344	0.146006	FALSE	1.22244e-07	0.544344	0.301478	-151.135
PAXBP1	0.0712089	0.291512	0.802106	0.0633609	FALSE	2.11518e-07	0.802106	0.444591	-83.6599
EPRS	0.0714411	0.292275	-0.602171	0.143251	FALSE	9.45057e-08	-0.602171	0.334045	-149.845
TSTA3	0.0716791	0.292876	-0.445679	0.195592	FALSE	0.00713355	-0.445679	0.247441	-2.79755
SRGN	0.0716398	0.292876	0.1337	9.45179	FALSE	1.52354e-07	0.1337	0.0742202	-1120.96
IST1	0.0719393	0.293752	-0.351447	0.352617	FALSE	1.46353e-06	-0.351447	0.195302	-272.225
ACO2	0.0720479	0.294009	-0.458833	0.209366	FALSE	9.15362e-08	-0.458833	0.255075	-191.407
UBE2L6	0.0723579	0.295086	-0.28762	0.727273	FALSE	2.30966e-08	-0.28762	0.160068	-385.615
SLC35E1	0.0724591	0.295311	0.794243	0.0688705	FALSE	1.92113e-07	0.794243	0.442174	-94.2322
MRPL11	0.0725874	0.295646	-0.454049	0.22314	FALSE	4.36382e-07	-0.454049	0.252893	-204.009
AKAP17A	0.0726674	0.295784	-0.481141	0.101928	FALSE	0.189502	-0.481141	0.268058	0
NAF1	0.0727951	0.296116	0.651134	0.129477	FALSE	3.09603e-08	0.651134	0.362928	-147.947
GDI2	0.0729691	0.296636	-0.236682	0.950413	FALSE	8.46581e-08	-0.236682	0.132002	-454.654
SMS	0.0730628	0.296698	-0.260144	0.774105	FALSE	2.55942e-07	-0.260144	0.145134	-429.567
MACROD1	0.0730768	0.296698	0.445669	0.0550964	FALSE	0.356344	0.445669	0.248651	-3.05211
COPS6	0.0731658	0.296872	0.303564	0.495868	FALSE	2.28974e-07	0.303564	0.169419	-327.321
TRIM27	0.0734023	0.297524	0.589761	0.110193	FALSE	7.67039e-07	0.589761	0.329416	-125.069
EIF4A1	0.0734192	0.297524	0.224121	1.06336	FALSE	5.56025e-07	0.224121	0.125192	-479.69
KCTD9	0.0735522	0.297531	-0.842528	0.0716253	FALSE	2.43193e-07	-0.842528	0.470847	-98.1262
POLD4	0.0735352	0.297531	-0.521782	0.168044	FALSE	2.41561e-07	-0.521782	0.291581	-173.608
MT-CYB	0.07356	0.297531	-0.146838	17.8099	FALSE	7.0159e-08	-0.146838	0.0820628	-1370.8
TOR1AIP1	0.0737148	0.297782	-0.626214	0.126722	FALSE	4.92246e-07	-0.626214	0.350157	-146.844
MRPL16	0.0736993	0.297782	-0.453721	0.209366	FALSE	6.96179e-07	-0.453721	0.253691	-195.492
IQGAP1	0.0739679	0.298616	-0.198576	1.34986	FALSE	2.72759e-07	-0.198576	0.111134	-532.356
NDUFA5	0.0741384	0.298929	-0.293224	0.471074	FALSE	1.66764e-06	-0.293224	0.164202	-301.188
SNRPD1	0.0740973	0.298929	0.251072	0.804408	FALSE	3.77423e-07	0.251072	0.140577	-419.853
CUTC	0.0743353	0.299534	-0.787497	0.0688705	FALSE	0.134349	-0.787497	0.441288	-21.0048
PDHB	0.0744512	0.299625	0.433456	0.212121	FALSE	4.45325e-07	0.433456	0.242992	-183.82
PFDN6	0.0744293	0.299625	0.381158	0.325069	FALSE	3.56088e-07	0.381158	0.213658	-257.663
UBAC2	0.0746934	0.300412	0.508897	0.157025	FALSE	2.74462e-07	0.508897	0.285521	-163.873
RGL1	0.074841	0.300817	0.871548	0.0661157	FALSE	5.10777e-08	0.871548	0.489239	-91.3354
DUSP11	0.075083	0.301493	0.557324	0.115702	FALSE	0.213189	0.557324	0.313111	-6.7259
BNIP3L	0.0751031	0.301493	0.287438	0.53168	FALSE	1.95834e-07	0.287438	0.161497	-336.733
ARMCX1	0.0754005	0.301931	0.330454	0.0826446	FALSE	0.593915	0.330454	0.185855	-2.5273
RNF141	0.0753497	0.301931	-0.684311	0.0991736	FALSE	7.35053e-08	-0.684311	0.384805	-120.053
SRSF1	0.0753079	0.301931	-0.477933	0.184573	FALSE	3.19348e-07	-0.477933	0.268716	-178.536
CCDC137	0.0753766	0.301931	-0.318004	0.107438	FALSE	0.672488	-0.318004	0.178838	-26.3529
AKR1B1	0.0756619	0.302673	-0.297733	0.564738	FALSE	3.45613e-08	-0.297733	0.167602	-330.207
UGCG	0.07568	0.302673	0.516218	0.217631	FALSE	7.9014e-08	0.516218	0.290611	-182.957
SSBP1	0.0758051	0.302985	-0.222058	1.01928	FALSE	2.33628e-07	-0.222058	0.125063	-470.627
TAGAP	0.0759602	0.303416	0.516177	0.187328	FALSE	1.35477e-07	0.516177	0.290866	-198.457
KRTCAP2	0.0761023	0.303562	0.27488	0.589532	FALSE	1.37088e-06	0.27488	0.15497	-366.792
RSRC2	0.0760974	0.303562	-0.272134	0.743802	FALSE	7.47108e-07	-0.272134	0.153419	-412.691
TMED3	0.0761387	0.303562	-0.362084	0.338843	FALSE	4.58438e-07	-0.362084	0.204158	-251.489
IDS	0.0762299	0.303737	0.379303	0.347107	FALSE	4.04326e-07	0.379303	0.213933	-259.312
GPR108	0.0763836	0.30416	-0.40814	0.239669	FALSE	5.00943e-07	-0.40814	0.230319	-208.677
PABPC4	0.0765414	0.3046	0.285463	0.633609	FALSE	5.90446e-08	0.285463	0.161177	-388.713
ZNHIT3	0.0767372	0.30519	-0.430496	0.23416	FALSE	1.60674e-07	-0.430496	0.243226	-208.897
ANXA2	0.0768275	0.305359	-0.116846	10.5179	FALSE	4.18376e-08	-0.116846	0.0660373	-1096.42
SIL1	0.0770203	0.305747	0.420282	0.242424	FALSE	4.37507e-07	0.420282	0.237683	-216.699
ATXN7L3B	0.0770176	0.305747	0.853623	0.0606061	FALSE	2.51932e-07	0.853623	0.482748	-84.831
API5	0.0772982	0.306661	-0.589915	0.121212	FALSE	4.22914e-07	-0.589915	0.33393	-133.569
IQSEC2	0.0774274	0.306765	-0.78655	0.0688705	FALSE	0.0135798	-0.78655	0.445433	-85.4132
CINP	0.0774679	0.306765	-0.447895	0.187328	FALSE	0.112889	-0.447895	0.253683	-113.865
KCTD17	0.0774326	0.306765	-0.786494	0.0688705	FALSE	0.0412153	-0.786494	0.445409	0
SRI	0.0775752	0.307001	-0.245262	0.809917	FALSE	3.11733e-08	-0.245262	0.138964	-408.289
CIB1	0.077637	0.307056	-0.207239	1.25069	FALSE	2.96869e-07	-0.207239	0.117445	-526.82
HSPA8	0.0776952	0.307097	-0.159106	3.72176	FALSE	7.06274e-08	-0.159106	0.0901849	-809.928
FOLR2	0.0777542	0.307141	0.633288	0.30854	FALSE	3.85162e-09	0.633288	0.359034	-206.165
KRT8	0.0780888	0.308083	0.811495	0.110193	FALSE	3.79298e-08	0.811495	0.460584	-105.169
TMED2	0.0780886	0.308083	-0.237034	0.853994	FALSE	3.19682e-07	-0.237034	0.134534	-428.291
SNRNP25	0.0783035	0.308741	-0.433357	0.245179	FALSE	3.18495e-07	-0.433357	0.246139	-203.611
RAP2C	0.0784648	0.308997	-0.633644	0.115702	FALSE	1.06241e-07	-0.633644	0.360094	-138.677
CD300E	0.0784614	0.308997	0.556171	0.212121	FALSE	1.36096e-07	0.556171	0.316063	-205.278
HNRNPH1	0.0785434	0.309117	-0.312173	0.53168	FALSE	1.93034e-07	-0.312173	0.177452	-339.061
CRIM1	0.0787702	0.30982	0.830964	0.0688705	FALSE	4.46834e-08	0.830964	0.472711	-90.414
VTA1	0.0788844	0.310079	-0.618082	0.104683	FALSE	1.61629e-06	-0.618082	0.351743	-124.982
ZNF280D	0.0790097	0.310381	0.738978	0.0743802	FALSE	1.67735e-07	0.738978	0.42072	-95.8759
SLC50A1	0.079132	0.310672	-0.527437	0.15427	FALSE	1.76777e-07	-0.527437	0.300406	-163.636
TPD52L2	0.0792548	0.310964	0.482959	0.173554	FALSE	1.51919e-08	0.482959	0.275186	-163.779
PCBD1	0.079382	0.311272	-0.349255	0.358127	FALSE	1.85447e-07	-0.349255	0.199087	-265.298
CWC15	0.0796032	0.311851	-0.353153	0.413223	FALSE	4.76656e-08	-0.353153	0.201457	-307.54
OSGEP	0.0796268	0.311851	0.400176	0.212121	FALSE	0.0361251	0.400176	0.228299	-12.1664
TNPO3	0.0796889	0.311904	-0.570332	0.118457	FALSE	0.0587139	-0.570332	0.32544	0
MTRF1L	0.079782	0.312078	0.645842	0.0936639	FALSE	1.41906e-07	0.645842	0.368641	-108.021
GANAB	0.0798941	0.312326	-0.574933	0.143251	FALSE	4.11691e-08	-0.574933	0.328289	-155.405
ARHGDIB	0.0799811	0.312476	-0.150677	3.06061	FALSE	4.81694e-08	-0.150677	0.0860622	-736.401
SH3GLB1	0.0800699	0.312633	-0.244174	0.870523	FALSE	9.2132e-07	-0.244174	0.139506	-442.041
AAMP	0.0804606	0.313396	0.41896	0.212121	FALSE	9.83347e-07	0.41896	0.239677	-193.449
SOX4	0.0803741	0.313396	0.375488	0.429752	FALSE	1.21092e-07	0.375488	0.214746	-276.482
CNPY2	0.0803697	0.313396	0.322149	0.404959	FALSE	7.80643e-07	0.322149	0.184238	-286.575
LENG1	0.080454	0.313396	-0.575777	0.143251	FALSE	2.14691e-07	-0.575777	0.329381	-159.259
IMPDH2	0.0806297	0.313618	0.31467	0.214876	FALSE	0.602276	0.31467	0.180116	-30.1823
TMEM176A	0.0808108	0.313618	0.415734	0.37741	FALSE	8.77287e-09	0.415734	0.238106	-276.405
MOSPD2	0.0807468	0.313618	-0.574869	0.134986	FALSE	6.35924e-08	-0.574869	0.329179	-143.957
RSU1	0.0806344	0.313618	-0.315651	0.451791	FALSE	4.88988e-07	-0.315651	0.18068	-306.253
DUSP5	0.0807832	0.313618	-0.730914	0.115702	FALSE	1.09543e-08	-0.730914	0.418584	-131.835
MAFG	0.0807569	0.313618	0.54816	0.129477	FALSE	1.8128e-07	0.54816	0.313896	-146.873
VPS37B	0.0809011	0.313779	0.62722	0.110193	FALSE	1.41174e-07	0.62722	0.359339	-138.756
WDR1	0.0810088	0.313829	-0.253176	0.785124	FALSE	4.31036e-07	-0.253176	0.145098	-402.968
PPP1R10	0.0810118	0.313829	-0.407315	0.286501	FALSE	1.32468e-07	-0.407315	0.233439	-241.776
STOM	0.0811638	0.314228	-0.30716	0.564738	FALSE	1.48132e-07	-0.30716	0.176126	-332.444
CNBP	0.0812814	0.314494	0.190424	1.51515	FALSE	2.75084e-07	0.190424	0.109232	-571.655
DCTN5	0.081341	0.314535	-0.844675	0.0716253	FALSE	8.02379e-09	-0.844675	0.484621	-91.3588
VAMP3	0.0817335	0.315579	-0.32885	0.421488	FALSE	2.83248e-07	-0.32885	0.188916	-298.537
MAFK	0.0818569	0.315579	0.656657	0.104683	FALSE	1.33134e-08	0.656657	0.377386	-121.639
OAS1	0.0817064	0.315579	-0.454933	0.256198	FALSE	5.91041e-08	-0.454933	0.261325	-214.878
MTMR6	0.0818401	0.315579	-0.480653	0.201102	FALSE	5.71388e-07	-0.480653	0.27622	-199.97
ATXN3	0.0817623	0.315579	0.514844	0.14876	FALSE	6.24361e-07	0.514844	0.295793	-156.68
SNRK	0.0822941	0.316694	0.780372	0.0743802	FALSE	1.23082e-07	0.780372	0.449128	-102.419
GRK6	0.0822076	0.316694	-0.541642	0.165289	FALSE	2.99906e-07	-0.541642	0.311643	-170.107
VAT1	0.0822742	0.316694	-0.276635	0.633609	FALSE	3.63993e-07	-0.276635	0.159202	-363.919
ETF1	0.0823924	0.316812	-0.310387	0.471074	FALSE	9.58514e-08	-0.310387	0.178694	-315.508
ATP9B	0.082522	0.316812	-0.457209	0.0964187	FALSE	0.302511	-0.457209	0.263333	0
TPM4	0.0825206	0.316812	-0.200345	1.47107	FALSE	1.22423e-08	-0.200345	0.11539	-552.046
ABHD8	0.0824631	0.316812	-0.812379	0.0716253	FALSE	4.95643e-08	-0.812379	0.467807	-91.4959
TMEM59	0.0826479	0.317032	-0.167186	2.18182	FALSE	9.37753e-08	-0.167186	0.0963315	-646.155
ENTPD3-AS1	0.0828191	0.317032	-0.831349	0.0661157	FALSE	1.43529e-07	-0.831349	0.479286	-90.3439
NMD3	0.0828114	0.317032	-0.877054	0.0606061	FALSE	1.6744e-07	-0.877054	0.505623	-81.9883
CREB5	0.0828264	0.317032	0.501439	0.212121	FALSE	1.9449e-07	0.501439	0.289095	-194.531
RILP	0.0826808	0.317032	-0.417458	0.206612	FALSE	9.54959e-06	-0.417458	0.240563	-180.938
ARMC10	0.0829397	0.317088	-0.463564	0.187328	FALSE	3.8058e-07	-0.463564	0.267357	-176.173
MT1E	0.0828971	0.317088	-0.362399	1.2562	FALSE	5.91422e-08	-0.362399	0.208982	-504.067
FOXJ3	0.0830863	0.317384	-0.723111	0.0853994	FALSE	8.18484e-09	-0.723111	0.417247	-100.761
AIF1	0.0831161	0.317384	-0.141226	5.61157	FALSE	3.9536e-08	-0.141226	0.0814975	-969.169
PLK3	0.0832177	0.317583	0.380162	0.325069	FALSE	3.15257e-07	0.380162	0.219453	-262.362
SLC31A2	0.0832884	0.317664	-0.27667	0.666667	FALSE	1.23118e-06	-0.27667	0.159748	-382.74
HADHA	0.0833883	0.317856	-0.289916	0.523416	FALSE	4.26787e-07	-0.289916	0.16745	-326.832
YBX1	0.0835593	0.317968	-0.117125	9.33609	FALSE	1.71442e-07	-0.117125	0.067687	-1070.56
TBC1D10B	0.0835662	0.317968	-0.689391	0.0826446	FALSE	0.00441935	-0.689391	0.39841	-14.9797
GAS2L1	0.0834893	0.317968	0.670529	0.0936639	FALSE	2.70112e-08	0.670529	0.387412	-112.275
CH25H	0.0836528	0.318109	0.753592	0.115702	FALSE	6.56804e-08	0.753592	0.435634	-120.927
C3orf38	0.0837028	0.31811	0.459898	0.0853994	FALSE	0.223342	0.459898	0.265899	-79.6793
NSL1	0.083815	0.318275	-0.458762	0.192837	FALSE	2.09661e-07	-0.458762	0.265339	-175.621
PPFIBP1	0.0838452	0.318275	0.820246	0.0633609	FALSE	1.25921e-07	0.820246	0.47446	-85.962
SEC24B	0.083943	0.318458	0.789493	0.0743802	FALSE	2.25567e-08	0.789493	0.456816	-99.5076
GCC2	0.0843444	0.319603	-0.600458	0.140496	FALSE	8.36029e-09	-0.600458	0.347886	-145.827
DNAJB14	0.0843119	0.319603	-0.534162	0.15978	FALSE	3.95916e-08	-0.534162	0.309444	-166.473
TTC19	0.0844008	0.319628	0.480221	0.198347	FALSE	3.60815e-07	0.480221	0.278275	-191.467
CYTH1	0.0845157	0.319874	-0.440323	0.231405	FALSE	3.3129e-07	-0.440323	0.25525	-214.352
C3orf14	0.0848371	0.320335	-0.623089	0.110193	FALSE	1.40433e-07	-0.623089	0.361571	-127.797
KCNQ1OT1	0.084837	0.320335	0.645679	0.121212	FALSE	1.09608e-07	0.645679	0.374679	-127.882
ZDHHC6	0.084794	0.320335	0.58351	0.137741	FALSE	3.64613e-07	0.58351	0.338557	-147.817
SHTN1	0.0847329	0.320335	-0.516499	0.173554	FALSE	2.23834e-07	-0.516499	0.299617	-170.443
HSP90AB1	0.0849833	0.320698	-0.137997	5.49587	FALSE	8.63315e-08	-0.137997	0.0801156	-925.378
APRT	0.0850705	0.320839	0.201781	1.35537	FALSE	8.42414e-08	0.201781	0.117179	-546.355
SLC25A1	0.0851582	0.320842	-0.595741	0.121212	FALSE	1.88684e-08	-0.595741	0.346057	-131.444
PARVB	0.0851713	0.320842	0.375341	0.297521	FALSE	5.19136e-07	0.375341	0.218039	-242.121
LINC01094	0.0856093	0.321588	-0.822921	0.0606061	FALSE	0.0194581	-0.822921	0.478713	-29.1126
DNPH1	0.085559	0.321588	0.35309	0.369146	FALSE	4.38508e-07	0.35309	0.205368	-281.185
STAM	0.085609	0.321588	-0.822923	0.0606061	FALSE	3.33003e-07	-0.822923	0.478714	-78.0816
FOXN3	0.0856199	0.321588	0.462277	0.190083	FALSE	2.49471e-07	0.462277	0.268927	-187.197
ERCC4	0.085609	0.321588	-0.822923	0.0606061	FALSE	0.0141146	-0.822923	0.478714	-19.1907
NRGN	0.0856974	0.321691	-0.581175	0.15427	FALSE	2.61312e-08	-0.581175	0.338179	-158.75
TRAK2	0.0857624	0.321707	-0.631969	0.0550964	FALSE	0.20374	-0.631969	0.367811	-2.48119
TMEM170A	0.085802	0.321707	-0.33164	0.187328	FALSE	0.202255	-0.33164	0.193042	0
SNW1	0.0858724	0.321783	-0.347913	0.333333	FALSE	5.769e-07	-0.347913	0.202559	-265.361
CD59	0.0862521	0.323017	0.218304	1.75758	FALSE	1.63866e-09	0.218304	0.127253	-593.148
RNGTT	0.0863453	0.323178	-0.835876	0.0606061	FALSE	1.36143e-07	-0.835876	0.487391	-83.9799
HSPB1	0.0864182	0.323263	-0.180776	6.90634	FALSE	1.80426e-08	-0.180776	0.105433	-1028.97
PTPRC	0.0864779	0.323297	-0.241978	1.07438	FALSE	5.62516e-07	-0.241978	0.141154	-498.502
PRPS2	0.0868194	0.324385	-0.722996	0.0964187	FALSE	2.75302e-07	-0.722996	0.422207	-119.861
GSTP1	0.0870086	0.324903	-0.139959	3.35537	FALSE	7.00866e-08	-0.139959	0.0817807	-751.612
BMPR2	0.0872604	0.325276	0.579557	0.107438	FALSE	6.35357e-08	0.579557	0.338916	-119.671
C12orf57	0.0872323	0.325276	0.341359	0.415978	FALSE	1.39965e-07	0.341359	0.199604	-303.526
SNUPN	0.0871959	0.325276	-0.400957	0.126722	FALSE	0.128189	-0.400957	0.234426	0
COA3	0.0873971	0.325407	-0.323591	0.443526	FALSE	1.87563e-07	-0.323591	0.189313	-316.889
MYL12B	0.0873917	0.325407	-0.148972	2.68871	FALSE	1.83039e-06	-0.148972	0.087153	-703.975
METAP1	0.087775	0.326246	-0.713684	0.0826446	FALSE	5.03989e-08	-0.713684	0.41803	-101.312
CSTF3	0.0877681	0.326246	0.533607	0.132231	FALSE	9.69944e-08	0.533607	0.312546	-144.061
MED15	0.0877343	0.326246	0.546924	0.121212	FALSE	2.57689e-07	0.546924	0.320312	-141.137
INIP	0.0878313	0.326267	-0.623687	0.123967	FALSE	1.15995e-07	-0.623687	0.365381	-139.396
ADAM10	0.087963	0.326567	-0.337308	0.374656	FALSE	2.33358e-07	-0.337308	0.197691	-275.658
GM2A	0.0880659	0.326571	-0.370129	0.333333	FALSE	7.6157e-07	-0.370129	0.216997	-267.709
DNMT1	0.0880495	0.326571	0.418929	0.225895	FALSE	4.1471e-07	0.418929	0.245594	-201.407
AMFR	0.0881529	0.326705	-0.731628	0.077135	FALSE	3.11805e-07	-0.731628	0.429051	-100.088
TRAC	0.0885914	0.328141	0.891227	0.0661157	FALSE	1.26567e-08	0.891227	0.523366	-89.4131
PHF1	0.0887119	0.328221	0.706977	0.077135	FALSE	9.62577e-09	0.706977	0.415323	-94.2012
NDEL1	0.0887153	0.328221	0.621281	0.0964187	FALSE	3.25094e-08	0.621281	0.364984	-108.599
PHYH	0.0889235	0.328802	-0.534905	0.15978	FALSE	6.83246e-08	-0.534905	0.314446	-163.577
RAB4A	0.0889932	0.32887	-0.381553	0.300275	FALSE	4.00807e-08	-0.381553	0.224346	-241.55
ADRM1	0.0890964	0.328873	0.233093	0.815427	FALSE	7.60015e-07	0.233093	0.137099	-412.842
TUG1	0.0890839	0.328873	0.556026	0.126722	FALSE	6.26442e-08	0.556026	0.327026	-143.442
SLC30A9	0.0891657	0.328939	-0.751268	0.077135	FALSE	1.36914e-07	-0.751268	0.44197	-102.361
RBBP5	0.0892173	0.328941	-0.882367	0.0633609	FALSE	1.02971e-07	-0.882367	0.51918	-87.0382
LYST	0.0893876	0.329379	-0.519207	0.173554	FALSE	3.81054e-07	-0.519207	0.305661	-171.594
THAP4	0.0896386	0.330115	0.75178	0.077135	FALSE	1.55009e-07	0.75178	0.442925	-96.2928
SLC8A1	0.0897453	0.330318	-0.466734	0.247934	FALSE	9.15702e-09	-0.466734	0.275076	-214.78
HS1BP3	0.0900918	0.331139	-0.719728	0.0826446	FALSE	8.91184e-08	-0.719728	0.42464	-107.374
DCP1A	0.090123	0.331139	0.489796	0.15427	FALSE	7.13041e-07	0.489796	0.289008	-163.037
HDAC2	0.0901212	0.331139	0.332444	0.336088	FALSE	5.06325e-07	0.332444	0.19616	-257.994
UHMK1	0.0903232	0.331685	-0.54182	0.151515	FALSE	3.12621e-07	-0.54182	0.319904	-161.297
AGGF1	0.0905042	0.332159	-0.505346	0.137741	FALSE	0.126085	-0.505346	0.298537	-87.595
TRAPPC12	0.0905949	0.332302	-0.706389	0.0853994	FALSE	4.14542e-08	-0.706389	0.417421	-107.145
NUDC	0.0909641	0.332718	0.254335	0.666667	FALSE	3.63944e-07	0.254335	0.150464	-388.768
S100A10	0.0908802	0.332718	-0.126802	18.5813	FALSE	7.8545e-08	-0.126802	0.0749962	-1353.75
NCSTN	0.0907931	0.332718	-0.441258	0.209366	FALSE	3.1203e-07	-0.441258	0.260909	-195.043
N4BP1	0.0909012	0.332718	0.576541	0.132231	FALSE	3.87695e-08	0.576541	0.341015	-144.762
GOT2	0.0909675	0.332718	-0.502603	0.137741	FALSE	0.0787868	-0.502603	0.297343	0
GNPTAB	0.0912342	0.333504	-0.568147	0.118457	FALSE	1.6067e-07	-0.568147	0.336396	-128.311
HSDL2	0.0917869	0.335333	-0.656621	0.107438	FALSE	9.18905e-09	-0.656621	0.389445	-119.614
WDR33	0.091979	0.335844	-0.39826	0.278237	FALSE	5.5691e-08	-0.39826	0.236349	-239.514
C6orf1	0.0920506	0.335914	0.536849	0.140496	FALSE	1.19555e-07	0.536849	0.318665	-157.707
MIF4GD	0.0921131	0.335951	0.414979	0.22865	FALSE	1.28447e-07	0.414979	0.246373	-210.075
PANK3	0.0925073	0.337191	0.675663	0.077135	FALSE	4.07031e-07	0.675663	0.401626	-101.637
PPDPF	0.0926003	0.337191	-0.177026	2.15978	FALSE	2.4264e-07	-0.177026	0.105258	-668.334
PVRL2	0.0926105	0.337191	0.368174	0.336088	FALSE	3.12353e-07	0.368174	0.218919	-265.975
MZT2A	0.0927669	0.337377	-0.345837	0.347107	FALSE	2.92378e-07	-0.345837	0.205736	-259.491
DENR	0.0927251	0.337377	-0.465662	0.209366	FALSE	4.05356e-07	-0.465662	0.276983	-198.026
CCBL2	0.0934025	0.33894	-0.70709	0.0743802	FALSE	0.0295791	-0.70709	0.42146	-80.9694
SLC6A6	0.093427	0.33894	-0.348729	0.38292	FALSE	1.02902e-06	-0.348729	0.207875	-296.656
TRUB2	0.0933447	0.33894	-0.707207	0.0743802	FALSE	5.70563e-05	-0.707207	0.421455	-91.2882
DPP3	0.0933736	0.33894	-0.768033	0.0688705	FALSE	2.20447e-07	-0.768033	0.457744	-90.1182
CSRP2	0.0934605	0.33894	0.784122	0.0606061	FALSE	6.18022e-08	0.784122	0.467457	-78.6276
COPA	0.0938267	0.340076	-0.437493	0.192837	FALSE	1.34705e-07	-0.437493	0.261104	-182.163
NDUFB4	0.0939928	0.340485	-0.215538	1.01377	FALSE	8.32492e-07	-0.215538	0.128702	-470.753
UBR4	0.094376	0.34072	0.686311	0.0743802	FALSE	2.26143e-07	0.686311	0.410288	-95.7667
MARCKSL1	0.0942619	0.34072	0.523081	0.198347	FALSE	2.14765e-08	0.523081	0.312599	-171.891
DAB2	0.0942633	0.34072	-0.222608	1.26997	FALSE	3.09379e-07	-0.222608	0.133033	-533.399
ACOT13	0.0943395	0.34072	-0.485967	0.184573	FALSE	3.67929e-07	-0.485967	0.290487	-182.218
PPP1R18	0.0943038	0.34072	-0.319806	0.374656	FALSE	7.08625e-07	-0.319806	0.191143	-268.381
SLC25A25	0.0941185	0.34072	-0.522822	0.162534	FALSE	5.50723e-08	-0.522822	0.312308	-169.726
TXNDC12	0.0946798	0.341624	-0.330384	0.402204	FALSE	4.071e-07	-0.330384	0.197691	-278.198
EMD	0.0953567	0.343873	0.446938	0.201102	FALSE	1.76451e-07	0.446938	0.267982	-197.83
DHDDS	0.0955812	0.344264	0.53532	0.0633609	FALSE	0.141236	0.53532	0.321193	0
ARHGAP30	0.0957867	0.344264	-0.434967	0.250689	FALSE	6.12371e-07	-0.434967	0.261142	-232.321
SUCLG2	0.0955422	0.344264	-0.450625	0.198347	FALSE	1.88349e-07	-0.450625	0.270344	-198.096
FBXO8	0.0957363	0.344264	-0.626739	0.0991736	FALSE	2.36421e-07	-0.626739	0.37622	-118.845
KDM3B	0.095696	0.344264	0.53808	0.0606061	FALSE	0.153802	0.53808	0.32296	0
SUDS3	0.0957615	0.344264	-0.483633	0.0826446	FALSE	0.168367	-0.483633	0.290338	0
TMEM206	0.0960572	0.344401	0.781012	0.0798898	FALSE	1.24972e-07	0.781012	0.46928	-103.038
CCDC88A	0.0960831	0.344401	-0.288881	0.482094	FALSE	1.777e-07	-0.288881	0.173591	-325.133
CDKN2AIPNL	0.0959917	0.344401	0.752709	0.0633609	FALSE	9.42065e-08	0.752709	0.452185	-87.5989
MUC12	0.0961175	0.344401	-0.695903	0.0909091	FALSE	1.69173e-08	-0.695903	0.418217	-102.538
PGRMC1	0.0958938	0.344401	-0.432717	0.217631	FALSE	5.44927e-07	-0.432717	0.259876	-199.225
ARHGEF6	0.096147	0.344401	-0.63136	0.0881543	FALSE	0.0269367	-0.63136	0.379462	-27.5157
TWF1	0.0963297	0.344864	-0.765349	0.0661157	FALSE	2.17066e-07	-0.765349	0.460246	-88.7164
ARID5A	0.0966728	0.345899	0.318946	0.4573	FALSE	3.12997e-07	0.318946	0.191997	-316.541
MPC1	0.0968364	0.346291	-0.302303	0.410468	FALSE	2.75372e-07	-0.302303	0.182068	-284.982
MTIF3	0.096964	0.346555	-0.294408	0.528926	FALSE	6.57097e-07	-0.294408	0.17738	-353.358
TXNDC9	0.0971092	0.34688	-0.399088	0.231405	FALSE	4.61053e-07	-0.399088	0.240555	-207.188
ATF7IP2	0.0973556	0.347567	-0.829085	0.0633609	FALSE	7.80943e-08	-0.829085	0.500108	-88.5497
GTPBP1	0.0974625	0.347755	0.776946	0.0550964	FALSE	2.73707e-06	0.776946	0.468807	-76.1473
SAV1	0.0975714	0.34795	-0.553325	0.143251	FALSE	8.28936e-08	-0.553325	0.333984	-144.971
MIIP	0.0982364	0.349232	-0.438421	0.192837	FALSE	1.63593e-07	-0.438421	0.265153	-181.99
THRAP3	0.0981762	0.349232	0.294004	0.449036	FALSE	9.09232e-07	0.294004	0.177779	-311.74
PSMA5	0.0983115	0.349232	-0.25732	0.573003	FALSE	3.6094e-07	-0.25732	0.155659	-332.324
PRKAG2	0.098176	0.349232	0.566384	0.115702	FALSE	1.10982e-07	0.566384	0.342482	-134.02
MSRA	0.0982949	0.349232	-0.374448	0.272727	FALSE	4.86907e-07	-0.374448	0.226502	-227.926
ZBTB44	0.0982859	0.349232	-0.63046	0.0881543	FALSE	0.106098	-0.63046	0.381352	0
COQ9	0.0982303	0.349232	-0.576797	0.110193	FALSE	7.82736e-08	-0.576797	0.348835	-120.866
TRIM56	0.0984502	0.349531	0.669667	0.0826446	FALSE	6.9517e-08	0.669667	0.405266	-106.109
PSMA4	0.0985735	0.349775	-0.178484	1.63912	FALSE	2.63888e-07	-0.178484	0.108053	-579.759
ZRANB1	0.0987385	0.350167	0.718362	0.0743802	FALSE	6.85504e-08	0.718362	0.435107	-98.6605
TSN	0.0989439	0.350702	-0.512448	0.137741	FALSE	1.68204e-07	-0.512448	0.310575	-146.886
NECAP1	0.0990097	0.350741	-0.881152	0.0578512	FALSE	7.49013e-08	-0.881152	0.534137	-83.247
QKI	0.0991795	0.350955	-0.354994	0.325069	FALSE	6.72772e-07	-0.354994	0.215298	-266.822
TCEAL4	0.0991743	0.350955	-0.245107	0.716253	FALSE	8.42959e-08	-0.245107	0.148652	-394.571
KLHL6	0.0996226	0.352296	-0.305836	0.0991736	FALSE	0.636863	-0.305836	0.185728	-29.9074
UTP6	0.0996969	0.352296	0.509157	0.129477	FALSE	1.20124e-07	0.509157	0.309269	-141.77
IGFLR1	0.099723	0.352296	0.823684	0.0661157	FALSE	4.38374e-08	0.823684	0.500356	-97.38
RPL17	0.0999359	0.352854	0.236281	0.809917	FALSE	5.12005e-08	0.236281	0.143621	-437.841
MRPL34	0.100013	0.352932	-0.342009	0.347107	FALSE	6.28585e-07	-0.342009	0.207935	-271.194
LINC00493	0.100239	0.353535	-0.26113	0.608815	FALSE	7.9096e-07	-0.26113	0.158868	-365.375
CALU	0.100308	0.353584	-0.31213	0.460055	FALSE	3.56943e-07	-0.31213	0.189934	-311.415
APPL1	0.100371	0.353613	-0.361443	0.300275	FALSE	2.2172e-07	-0.361443	0.219982	-243.564
SMARCB1	0.100472	0.353775	0.405977	0.187328	FALSE	7.68112e-06	0.405977	0.24716	-162.294
SPTLC2	0.100578	0.353817	0.489966	0.146006	FALSE	7.47352e-08	0.489966	0.298386	-151.123
APMAP	0.10065	0.353817	-0.366443	0.322314	FALSE	5.30656e-07	-0.366443	0.223208	-253.404
PET100	0.1006	0.353817	-0.187421	1.38017	FALSE	1.14452e-06	-0.187421	0.114146	-554.413
SDHA	0.100754	0.353989	-0.4263	0.203857	FALSE	6.75984e-08	-0.4263	0.259747	-182.35
XPO1	0.101021	0.354379	-0.511432	0.162534	FALSE	2.90758e-08	-0.511432	0.311864	-161.486
FBXO25	0.10103	0.354379	-0.532875	0.115702	FALSE	0.00312198	-0.532875	0.324948	-131.359
KIAA0368	0.100955	0.354379	-0.78392	0.0578512	FALSE	0.104476	-0.78392	0.47793	-41.7344
CASP3	0.10139	0.355446	-0.463284	0.0853994	FALSE	0.141646	-0.463284	0.282809	0
LSP1	0.101584	0.355932	0.192429	2.00275	FALSE	2.69078e-08	0.192429	0.117534	-678.941
MMD	0.10167	0.35604	-0.774995	0.0688705	FALSE	3.97962e-08	-0.774995	0.473479	-89.4646
ARID1A	0.102205	0.357134	0.395655	0.22314	FALSE	2.18678e-07	0.395655	0.242101	-209.061
PARP1	0.102117	0.357134	-0.410797	0.22865	FALSE	9.87202e-08	-0.410797	0.251302	-202.646
BET1	0.102205	0.357134	-0.498447	0.129477	FALSE	0.0558705	-0.498447	0.304999	-4.73587
PSMC3	0.102094	0.357134	0.258317	0.61157	FALSE	7.47833e-07	0.258317	0.158013	-358.907
C15orf40	0.102761	0.35888	-0.526153	0.123967	FALSE	3.34028e-07	-0.526153	0.322474	-138.575
JAK1	0.102878	0.359094	0.31893	0.432507	FALSE	2.34123e-07	0.31893	0.195536	-320.964
TRAPPC3	0.103117	0.359672	-0.260069	0.561983	FALSE	9.58331e-07	-0.260069	0.159559	-343.95
QPCT	0.103212	0.359672	0.345454	0.333333	FALSE	7.39103e-07	0.345454	0.212003	-261.946
CRBN	0.103165	0.359672	-0.502982	0.176309	FALSE	1.52768e-07	-0.502982	0.308635	-173.32
NUDCD3	0.103324	0.359675	-0.715099	0.0743802	FALSE	2.80627e-07	-0.715099	0.438995	-101.449
HCAR2	0.10331	0.359675	-0.551514	0.179063	FALSE	1.10593e-07	-0.551514	0.338557	-160.754
AGL	0.103488	0.359679	0.343337	0.0716253	FALSE	0.446253	0.343337	0.210872	-5.1567
PTRHD1	0.10355	0.359679	-0.352238	0.30303	FALSE	1.72579e-07	-0.352238	0.216378	-252.485
GNAI2	0.103477	0.359679	-0.201131	1.19835	FALSE	1.12885e-06	-0.201131	0.123527	-513.199
DNAJC7	0.103525	0.359679	-0.272163	0.545455	FALSE	3.8037e-07	-0.272163	0.167176	-349.039
MKKS	0.103694	0.359825	0.368751	0.297521	FALSE	2.67366e-07	0.368751	0.226617	-247.826
H1F0	0.103704	0.359825	0.51206	0.162534	FALSE	5.91185e-08	0.51206	0.314696	-173.405
CDC16	0.103894	0.360291	-0.583601	0.112948	FALSE	6.38903e-08	-0.583601	0.358861	-122.342
SH3BGRL3	0.103978	0.360385	0.108969	12.3388	FALSE	2.35655e-07	0.108969	0.0670221	-1183.41
DAPK1	0.104155	0.360805	-0.585394	0.115702	FALSE	1.87774e-07	-0.585394	0.360235	-132.685
C11orf54	0.104263	0.360983	-0.649403	0.101928	FALSE	3.6371e-08	-0.649403	0.399748	-120.676
FAR2	0.104787	0.362408	-0.632085	0.0909091	FALSE	3.49611e-08	-0.632085	0.389676	-106.302
TMEM11	0.104754	0.362408	-0.477165	0.157025	FALSE	4.29174e-08	-0.477165	0.294141	-152.258
HPGDS	0.104951	0.362703	-0.830733	0.110193	FALSE	2.37502e-08	-0.830733	0.512383	-110.681
NCOA7	0.105072	0.362703	0.600971	0.151515	FALSE	1.11432e-08	0.600971	0.370799	-143.713
PHF10	0.105099	0.362703	0.718178	0.0606061	FALSE	0.088718	0.718178	0.443149	0
APBB1IP	0.105069	0.362703	-0.405465	0.253444	FALSE	1.49062e-07	-0.405465	0.25017	-225.634
MIDN	0.105199	0.362855	0.278327	0.581267	FALSE	1.41446e-07	0.278327	0.17179	-372.696
COX7A2L	0.105338	0.363139	-0.212859	0.958678	FALSE	2.23894e-07	-0.212859	0.131435	-463.179
TUBA4A	0.10553	0.363214	0.842755	0.0743802	FALSE	1.06835e-08	0.842755	0.520664	-91.6913
RHOF	0.105458	0.363214	0.717522	0.0606061	FALSE	0.00145712	0.717522	0.443203	-83.0438
PPIB	0.105517	0.363214	0.16659	1.89807	FALSE	1.42244e-08	0.16659	0.102917	-611.765
ETFB	0.105876	0.364211	-0.216485	0.724518	FALSE	1.889e-06	-0.216485	0.13388	-374.96
FKBP5	0.106274	0.364992	0.293535	0.429752	FALSE	1.30087e-06	0.293535	0.181736	-314.488
GOSR2	0.106231	0.364992	0.540899	0.101928	FALSE	0.137624	0.540899	0.334845	-48.2889
MT-ND6	0.106266	0.364992	-0.478045	0.184573	FALSE	3.32704e-08	-0.478045	0.295965	-184.826
PARP9	0.106454	0.365221	-0.419426	0.176309	FALSE	0.00934743	-0.419426	0.259813	-19.7997
ACAT1	0.106435	0.365221	-0.330254	0.341598	FALSE	1.1807e-07	-0.330254	0.204564	-263.132
FAM26F	0.106675	0.365785	0.505415	0.15978	FALSE	3.4931e-07	0.505415	0.313277	-166.294
FRA10AC1	0.106869	0.366252	0.512388	0.134986	FALSE	4.30672e-08	0.512388	0.317774	-141.732
DRAP1	0.106975	0.366419	0.193463	1.22039	FALSE	1.09909e-07	0.193463	0.120018	-511.066
NSFL1C	0.107345	0.367492	-0.431852	0.209366	FALSE	5.01123e-08	-0.431852	0.268191	-195.893
BROX	0.107556	0.367821	-0.562151	0.123967	FALSE	1.7956e-07	-0.562151	0.349319	-141.076
EIF2S3	0.10751	0.367821	-0.388124	0.242424	FALSE	2.31932e-07	-0.388124	0.241148	-211.305
GALNS	0.108203	0.369839	-0.693581	0.0798898	FALSE	2.73531e-08	-0.693581	0.431782	-95.7438
TGFBR1	0.108332	0.370081	0.623235	0.0964187	FALSE	1.86881e-07	0.623235	0.38813	-120.921
PPP6R1	0.108443	0.370262	-0.528929	0.129477	FALSE	1.11329e-07	-0.528929	0.329503	-146.946
FBXO6	0.108895	0.370545	-0.508493	0.134986	FALSE	2.32366e-08	-0.508493	0.317178	-139.14
CD46	0.108927	0.370545	-0.344694	0.30303	FALSE	1.14175e-07	-0.344694	0.215026	-243.307
EIF4G2	0.108893	0.370545	-0.198392	1.28099	FALSE	7.56576e-08	-0.198392	0.123748	-530.989
DNAJB12	0.108637	0.370545	-0.34818	0.14876	FALSE	0.265372	-0.34818	0.217022	0
ZC3H13	0.108806	0.370545	-0.319325	0.352617	FALSE	1.67928e-07	-0.319325	0.199132	-274.133
BCL2L12	0.108929	0.370545	0.620764	0.0909091	FALSE	4.87297e-08	0.620764	0.387246	-104.994
CBX6	0.108813	0.370545	0.694595	0.0909091	FALSE	6.80866e-08	0.694595	0.43316	-110.567
SLC52A2	0.109008	0.370616	-0.352519	0.143251	FALSE	0.349253	-0.352519	0.219958	-68.7147
NME7	0.10957	0.370672	0.752823	0.0578512	FALSE	4.62945e-07	0.752823	0.470476	-81.2893
FMNL2	0.109544	0.370672	-0.616385	0.0964187	FALSE	3.10103e-08	-0.616385	0.385181	-110.907
ZNF148	0.109277	0.370672	-0.581746	0.101928	FALSE	5.85799e-08	-0.581746	0.363262	-119.312
TBC1D1	0.109541	0.370672	-0.570668	0.115702	FALSE	1.75995e-08	-0.570668	0.356609	-128.1
SETD9	0.109321	0.370672	-0.647765	0.0798898	FALSE	4.75988e-06	-0.647765	0.404536	-99.3626
PDCL	0.109222	0.370672	-0.544533	0.129477	FALSE	1.74448e-07	-0.544533	0.339972	-135.654
BTBD10	0.109583	0.370672	-0.770106	0.0578512	FALSE	0.0629963	-0.770106	0.481295	-45.6352
SUPT16H	0.109313	0.370672	-0.435972	0.192837	FALSE	1.37254e-07	-0.435972	0.272263	-179.64
NME1	0.109657	0.370672	0.294568	0.550964	FALSE	7.77737e-09	0.294568	0.184135	-344.284
ATP5A1	0.109705	0.370672	-0.185274	1.19284	FALSE	5.85645e-07	-0.185274	0.115831	-480.414
TNFSF14	0.109718	0.370672	0.75153	0.110193	FALSE	6.29882e-09	0.75153	0.469864	-126.033
COLGALT1	0.109616	0.370672	-0.334799	0.330579	FALSE	5.57718e-07	-0.334799	0.20926	-265.456
ZMYND8	0.110014	0.371479	-0.512676	0.134986	FALSE	6.77097e-07	-0.512676	0.320797	-151.56
MAP4K4	0.110131	0.371677	0.505759	0.137741	FALSE	1.91843e-07	0.505759	0.316573	-150.444
PURB	0.11042	0.371872	0.530782	0.121212	FALSE	7.296e-08	0.530782	0.332506	-136.002
PRR13	0.110409	0.371872	-0.159037	1.92837	FALSE	1.22978e-06	-0.159037	0.0996247	-632.936
PIM3	0.110339	0.371872	0.285073	0.509642	FALSE	1.48849e-07	0.285073	0.178542	-344.733
MRPS6	0.110272	0.371872	0.332638	0.352617	FALSE	5.48864e-07	0.332638	0.208293	-272.601
THAP9-AS1	0.110738	0.372176	-0.559418	0.118457	FALSE	9.37717e-08	-0.559418	0.350758	-130.883
PUF60	0.110626	0.372176	0.265852	0.493113	FALSE	3.19114e-07	0.265852	0.166638	-326.363
SPIN1	0.110742	0.372176	-0.587016	0.110193	FALSE	2.53346e-07	-0.587016	0.368066	-127.559
FAM110A	0.110647	0.372176	-0.767736	0.0716253	FALSE	3.19316e-08	-0.767736	0.481252	-88.4499
CCPG1	0.11102	0.372912	-0.301031	0.421488	FALSE	7.35701e-08	-0.301031	0.188897	-295.863
CCNL2	0.111226	0.37341	-0.54894	0.107438	FALSE	4.32515e-06	-0.54894	0.344659	-122.438
ITGB1	0.111464	0.374014	-0.215236	0.936639	FALSE	1.59876e-07	-0.215236	0.135228	-448.902
MDFIC	0.111605	0.374154	-0.472326	0.15427	FALSE	4.47325e-07	-0.472326	0.29687	-157.454
PLVAP	0.111623	0.374154	0.764139	0.0881543	FALSE	2.3042e-09	0.764139	0.480306	-97.1412
USP39	0.112118	0.374836	-0.723226	0.0743802	FALSE	1.08761e-07	-0.723226	0.455218	-96.9507
CLCN3	0.112024	0.374836	0.75116	0.0578512	FALSE	5.37195e-08	0.75116	0.472677	-76.9352
EHBP1L1	0.111949	0.374836	-0.442815	0.184573	FALSE	1.81282e-07	-0.442815	0.278589	-182.552
PSME2	0.112093	0.374836	-0.178712	1.55647	FALSE	2.08196e-07	-0.178712	0.112479	-561.93
CPPED1	0.112024	0.374836	-0.49295	0.137741	FALSE	1.88256e-07	-0.49295	0.310195	-145.028
COA5	0.112659	0.375707	-0.356048	0.132231	FALSE	0.151863	-0.356048	0.224444	0
TNFAIP3	0.112699	0.375707	0.274459	0.853994	FALSE	2.44436e-08	0.274459	0.173032	-450.377
INTS1	0.112745	0.375707	-0.82036	0.0606061	FALSE	2.66859e-07	-0.82036	0.517259	-86.7955
ACP2	0.112773	0.375707	-0.390659	0.195592	FALSE	0.0881282	-0.390659	0.246341	0
SLC38A2	0.112728	0.375707	0.274155	0.523416	FALSE	7.50849e-08	0.274155	0.172854	-341.14
SLC2A4RG	0.112731	0.375707	0.668732	0.0661157	FALSE	0.0295708	0.668732	0.421637	0
DNASE2	0.112788	0.375707	-0.310858	0.498623	FALSE	3.24449e-08	-0.310858	0.196028	-319.629
FHL3	0.113045	0.375872	0.557424	0.0991736	FALSE	4.55279e-07	0.557424	0.351764	-116.931
MAPKAPK3	0.113072	0.375872	0.328647	0.31405	FALSE	1.21538e-07	0.328647	0.207409	-253.435
SNRPN	0.113069	0.375872	0.435934	0.170799	FALSE	1.29619e-08	0.435934	0.275115	-160.069
CRNKL1	0.112998	0.375872	-0.587145	0.101928	FALSE	4.06984e-08	-0.587145	0.370471	-115.234
PROS1	0.113299	0.376238	-0.580411	0.0936639	FALSE	0.00750848	-0.580411	0.366529	-100.314
MED11	0.113279	0.376238	-0.568979	0.121212	FALSE	9.16385e-08	-0.568979	0.359288	-139.031
C1orf122	0.11341	0.37629	0.27336	0.506887	FALSE	8.91939e-08	0.27336	0.172679	-329.097
ANO10	0.113432	0.37629	-0.695715	0.0743802	FALSE	4.34493e-08	-0.695715	0.439505	-96.7509
C14orf119	0.113602	0.376511	-0.28114	0.446281	FALSE	1.31956e-07	-0.28114	0.177689	-298.56
GALK1	0.113616	0.376511	0.385016	0.220386	FALSE	7.20642e-07	0.385016	0.24335	-202.802
CD37	0.113817	0.376982	-0.210109	1.09366	FALSE	1.59775e-07	-0.210109	0.132874	-497.602
ATP5I	0.114044	0.37754	0.13325	3.49311	FALSE	4.98374e-07	0.13325	0.0843212	-811.938
LARP7	0.114154	0.37771	-0.328846	0.374656	FALSE	2.1595e-07	-0.328846	0.208157	-277.925
MAFB	0.114417	0.378385	0.260343	0.859504	FALSE	3.60001e-08	0.260343	0.164916	-447.922
ARHGAP4	0.1146	0.378792	0.537465	0.107438	FALSE	5.9339e-08	0.537465	0.340631	-120.685
PQLC3	0.114682	0.37887	-0.351764	0.30303	FALSE	9.5161e-08	-0.351764	0.222989	-246.407
ATP5F1	0.114818	0.379125	-0.181407	1.19835	FALSE	3.59319e-07	-0.181407	0.11504	-496.48
S100A11	0.115019	0.379203	-0.0986201	25.3416	FALSE	2.45935e-08	-0.0986201	0.0625751	-1416.28
ATF6B	0.114922	0.379203	0.524157	0.137741	FALSE	5.22601e-08	0.524157	0.332492	-150.277
NOLC1	0.114973	0.379203	0.502499	0.140496	FALSE	2.84817e-07	0.502499	0.318798	-148.195
PAFAH1B3	0.115328	0.379917	-0.557025	0.107438	FALSE	1.44473e-07	-0.557025	0.353736	-121.623
TXNRD2	0.115354	0.379917	-0.496732	0.134986	FALSE	2.14455e-07	-0.496732	0.31547	-145.634
FAM122A	0.115801	0.381194	-0.727406	0.0798898	FALSE	9.6062e-09	-0.727406	0.462537	-99.8573
PGM1	0.116384	0.381847	-0.527581	0.121212	FALSE	1.63945e-07	-0.527581	0.33601	-128.991
ALPK1	0.116414	0.381847	-0.758384	0.0578512	FALSE	0.065475	-0.758384	0.483046	0
NT5DC1	0.116416	0.381847	-0.758377	0.0578512	FALSE	0.0115448	-0.758377	0.483044	-67.5014
ZC2HC1A	0.116414	0.381847	-0.758384	0.0578512	FALSE	1.89218e-07	-0.758384	0.483046	-78.1192
PDHX	0.116414	0.381847	-0.758384	0.0578512	FALSE	0.0799744	-0.758384	0.483046	0
ZBTB16	0.116365	0.381847	0.579499	0.101928	FALSE	6.49203e-08	0.579499	0.369057	-104.754
NCOA4	0.116317	0.381847	-0.309205	0.371901	FALSE	1.07084e-07	-0.309205	0.196893	-279.248
CWC22	0.11656	0.381929	0.587949	0.101928	FALSE	2.09319e-07	0.587949	0.374638	-125.23
MANEA	0.116537	0.381929	-0.758035	0.0578512	FALSE	0.0160589	-0.758035	0.482986	-69.3978
ATP6V1B2	0.116624	0.381942	-0.267715	0.62259	FALSE	3.25048e-07	-0.267715	0.170616	-383.919
TMEM189	0.116702	0.382003	-0.510263	0.0716253	FALSE	0.130295	-0.510263	0.325263	0
NMT1	0.116895	0.382442	-0.250286	0.567493	FALSE	8.07447e-08	-0.250286	0.159627	-340.301
HES1	0.117096	0.382791	0.385003	0.449036	FALSE	1.77431e-08	0.385003	0.245682	-294.615
TRIQK	0.117121	0.382791	-0.693423	0.0743802	FALSE	1.02267e-07	-0.693423	0.442524	-94.3046
RABGAP1L	0.117334	0.382902	-0.599154	0.0853994	FALSE	0.165452	-0.599154	0.382586	-24.9871
GSAP	0.117295	0.382902	-0.548266	0.110193	FALSE	5.01856e-08	-0.548266	0.350055	-124.52
CHFR	0.117279	0.382902	-0.734604	0.0688705	FALSE	1.02522e-07	-0.734604	0.469007	-95.0321
ADI1	0.117526	0.383137	-0.314627	0.396694	FALSE	9.93305e-08	-0.314627	0.201008	-282.704
GLO1	0.117515	0.383137	-0.344249	0.286501	FALSE	1.24217e-07	-0.344249	0.219927	-228.285
PGP	0.117626	0.383269	-0.366618	0.214876	FALSE	1.35959e-05	-0.366618	0.234288	-193.137
CORO1B	0.117699	0.383312	-0.309522	0.424242	FALSE	6.41123e-09	-0.309522	0.19784	-291.288
PFDN2	0.117949	0.383345	-0.182915	1.2865	FALSE	6.84936e-08	-0.182915	0.116995	-526.558
NINJ2	0.117805	0.383345	-0.714064	0.0743802	FALSE	1.3246e-07	-0.714064	0.456546	-93.3143
PDIA3	0.117975	0.383345	0.183109	1.23416	FALSE	1.22831e-06	0.183109	0.117128	-509.696
PKIG	0.117872	0.383345	0.396978	0.110193	FALSE	0.231952	0.396978	0.25386	-60.0742
PKN1	0.118008	0.383345	-0.507276	0.137741	FALSE	1.03324e-07	-0.507276	0.324513	-155.12
PPP1R12A	0.118302	0.384107	0.359866	0.280992	FALSE	3.59018e-07	0.359866	0.230397	-237.487
UGGT1	0.118495	0.384116	-0.693171	0.0716253	FALSE	1.74239e-07	-0.693171	0.444021	-97.0196
ATF1	0.118662	0.384116	0.530696	0.115702	FALSE	3.91702e-08	0.530696	0.340099	-127.833
MRPL46	0.118582	0.384116	-0.506231	0.121212	FALSE	1.83477e-07	-0.506231	0.32435	-129.921
RNASEK	0.118444	0.384116	0.460487	0.134986	FALSE	7.3697e-07	0.460487	0.294931	-150.882
WSB1	0.118664	0.384116	-0.204017	1.01653	FALSE	5.83033e-07	-0.204017	0.130746	-480.955
MLX	0.118663	0.384116	-0.408888	0.217631	FALSE	5.55668e-08	-0.408888	0.262038	-199.558
CIAPIN1	0.118779	0.384296	0.496089	0.121212	FALSE	1.33843e-07	0.496089	0.318022	-129.482
UMPS	0.118891	0.384464	-0.745909	0.0633609	FALSE	2.9969e-08	-0.745909	0.478317	-85.2706
NFE2L2	0.119024	0.384608	0.217754	0.928375	FALSE	3.50779e-07	0.217754	0.139686	-466.029
ISY1	0.119055	0.384608	-0.554761	0.107438	FALSE	2.20571e-08	-0.554761	0.355901	-116.166
KIAA0101	0.119281	0.384999	-0.840203	0.264463	FALSE	2.42989e-08	-0.840203	0.539353	-131.15
DSC2	0.119296	0.384999	-0.454871	0.162534	FALSE	7.1275e-07	-0.454871	0.292008	-175.608
DHRS9	0.119748	0.386264	0.76758	0.077135	FALSE	1.71079e-07	0.76758	0.493357	-102.408
NFYB	0.120193	0.387504	0.530946	0.110193	FALSE	2.66442e-07	0.530946	0.341673	-131.742
CES1	0.120342	0.387789	-0.452567	0.421488	FALSE	9.74704e-08	-0.452567	0.291351	-271.954
NAMPT	0.120426	0.387841	0.170961	2.1405	FALSE	6.01519e-08	0.170961	0.110085	-704.235
TRIP10	0.120479	0.387841	0.627233	0.077135	FALSE	4.27383e-08	0.627233	0.403946	-95.2459
NAA60	0.120548	0.387868	-0.298292	0.0936639	FALSE	0.598483	-0.298292	0.192139	-24.1564
KLHL9	0.121452	0.390582	-0.570553	0.0853994	FALSE	0.0535733	-0.570553	0.368406	-85.3211
RP11-108M9.4	0.121669	0.390598	0.429019	0.203857	FALSE	4.26465e-08	0.429019	0.277179	-204.828
FOSL2	0.121733	0.390598	0.292496	0.490358	FALSE	1.35457e-07	0.292496	0.189007	-347.129
ARL11	0.121761	0.390598	-0.573951	0.0936639	FALSE	6.89271e-08	-0.573951	0.370908	-111.429
[truncated: 4,420 more rows]
